# Supplementary material for: Proteomics and Metabolomics Based Analysis of Metabolic Changes in a Swine Model of Pulmonary Hypertension
Source: Preprints.org preprint supplement (doi:10.20944/preprints202301.0014.v1), 2023-01-03
Supplement: Supplementary file 2 [file supplementary data 1.xlsx]

## Sheet: Table 1
Proteins identified and quantified by LC-MS/MS-based proteomics
Gene	Protein IDs	Majority protein IDs	Fasta headers	Unique peptides	Razor + unique peptides	Intensity	Intensity Cntrl_Low_14	Intensity Cntrl_Low_16	Intensity Cntrl_Low_18	Intensity Cntrl_Low_19	Intensity Cntrl_Low_38	Intensity Cntrl_Low_6	Intensity Cntrl_Low_9	Intensity Cntrl_Up_14	Intensity Cntrl_Up_16	Intensity Cntrl_Up_18	Intensity Cntrl_Up_19	Intensity Cntrl_Up_38	Intensity Cntrl_Up_6	Intensity Cntrl_Up_9	Intensity PVB_Low_12	Intensity PVB_Low_13	Intensity PVB_Low_17_17	Intensity PVB_Low_17_18	Intensity PVB_Low_20	Intensity PVB_Low_8	Intensity PVB_Up_12	Intensity PVB_Up_13	Intensity PVB_Up_17_11	Intensity PVB_Up_17_16	Intensity PVB_Up_20	Intensity PVB_Up_8	LFQ intensity Cntrl_Low_14	LFQ intensity Cntrl_Low_16	LFQ intensity Cntrl_Low_18	LFQ intensity Cntrl_Low_19	LFQ intensity Cntrl_Low_38	LFQ intensity Cntrl_Low_6	LFQ intensity Cntrl_Low_9	LFQ intensity Cntrl_Up_14	LFQ intensity Cntrl_Up_16	LFQ intensity Cntrl_Up_18	LFQ intensity Cntrl_Up_19	LFQ intensity Cntrl_Up_38	LFQ intensity Cntrl_Up_6	LFQ intensity Cntrl_Up_9	LFQ intensity PVB_Low_12	LFQ intensity PVB_Low_13	LFQ intensity PVB_Low_17_17
LOC100737768	XP_020942626.1;XP_020942625.1;CON__P01966;XP_003481141.1	XP_020942626.1;XP_020942625.1	XP_020942626.1 hemoglobin subunit alpha-like GN=LOC100737768 [Sus scrofa];XP_020942625.1 hemoglobin subunit alpha GN=LOC110259958 [Sus scrofa]	11	12	6002900000000	302100000000	234130000000	256110000000	244080000000	247110000000	244920000000	292750000000	262150000000	138060000000	204450000000	128330000000	327850000000	228520000000	360480000000	177810000000	169310000000	311240000000	159450000000	230640000000	330540000000	206260000000	171900000000	101680000000	122820000000	290950000000	259310000000	305480000000	266910000000	244120000000	263520000000	314820000000	211280000000	272740000000	322820000000	350800000000	300870000000	376460000000	399960000000	630590000000	462350000000	147150000000	229680000000	429930000000
ALB	NP_001005208.1	NP_001005208.1	NP_001005208.1 serum albumin precursor GN=ALB [Sus scrofa]	54	67	4254000000000	144690000000	84073000000	136670000000	257480000000	206520000000	201860000000	191020000000	175970000000	82880000000	179240000000	84163000000	164820000000	279780000000	444640000000	160900000000	109180000000	128090000000	137970000000	135710000000	194150000000	160920000000	94087000000	129710000000	85807000000	83034000000	200660000000	165630000000	102860000000	141790000000	330590000000	264620000000	220430000000	216100000000	247550000000	202820000000	275970000000	201620000000	210230000000	779120000000	632700000000	154550000000	157870000000	193580000000
ACTG1	XP_003357976.1	XP_003357976.1	XP_003357976.1 actin, cytoplasmic 2 GN=ACTG1 [Sus scrofa]	2	32	4202100000000	189120000000	185520000000	186840000000	158020000000	193160000000	201570000000	179560000000	159370000000	117550000000	157790000000	109840000000	164990000000	89989000000	137200000000	204200000000	149200000000	154410000000	158730000000	190890000000	106880000000	181190000000	184210000000	167490000000	162130000000	143230000000	169080000000	213170000000	203910000000	189010000000	201180000000	203050000000	195590000000	191250000000	223240000000	278370000000	233410000000	280480000000	203220000000	231070000000	197170000000	187310000000	192750000000	212100000000
HBB	NP_001138313.1	NP_001138313.1	NP_001138313.1 hemoglobin subunit beta GN=HBB [Sus scrofa]	7	15	3876600000000	202280000000	155870000000	156740000000	157130000000	200910000000	150750000000	182630000000	149650000000	117430000000	133420000000	101540000000	205980000000	180070000000	176910000000	102770000000	117400000000	220010000000	97766000000	151640000000	157660000000	141480000000	135720000000	73965000000	97619000000	164320000000	144920000000	208690000000	178460000000	163280000000	175590000000	223780000000	134910000000	177790000000	227630000000	311640000000	224790000000	315150000000	232290000000	489980000000	299680000000	86547000000	166210000000	307750000000
MYH9	XP_020947197.1;REV__XP_013833673.1;REV__XP_020954903.1;REV__XP_020954902.1;REV__XP_020954901.1;REV__XP_020954900.1;REV__XP_013833674.2	XP_020947197.1	XP_020947197.1 LOW QUALITY PROTEIN: myosin-9 GN=MYH9 [Sus scrofa]	138	165	1233700000000	57700000000	40844000000	57665000000	50800000000	39906000000	64833000000	53636000000	52885000000	24125000000	39681000000	19107000000	46463000000	19305000000	43067000000	93664000000	53633000000	38833000000	56336000000	56890000000	30313000000	63485000000	59060000000	48493000000	32742000000	36350000000	53931000000	61522000000	49622000000	58472000000	59923000000	49685000000	62562000000	54929000000	68128000000	63863000000	59048000000	57543000000	55739000000	56340000000	54156000000	82812000000	77748000000	56875000000
FLNA	XP_020936397.1;XP_020936396.1;XP_020936395.1;XP_020936394.1;XP_020936393.1;XP_020936392.1;XP_020936390.1;XP_020936389.1;XP_020936386.1;XP_020936385.1;XP_020936387.1;XP_020936384.1;XP_020936388.1;XP_020936383.1;XP_020936382.1	XP_020936397.1;XP_020936396.1;XP_020936395.1;XP_020936394.1;XP_020936393.1;XP_020936392.1;XP_020936390.1;XP_020936389.1;XP_020936386.1;XP_020936385.1;XP_020936387.1;XP_020936384.1;XP_020936388.1;XP_020936383.1;XP_020936382.1	XP_020936397.1 filamin-A isoform X10 GN=FLNA [Sus scrofa];XP_020936396.1 filamin-A isoform X10 GN=FLNA [Sus scrofa];XP_020936395.1 filamin-A isoform X10 GN=FLNA [Sus scrofa];XP_020936394.1 filamin-A isoform X9 GN=FLNA [Sus scrofa];XP_020936393.1 filamin-A	30	152	1176700000000	62563000000	45373000000	51813000000	51047000000	58164000000	66982000000	54914000000	51575000000	23981000000	35337000000	17371000000	42509000000	17204000000	38009000000	89283000000	42784000000	36666000000	50591000000	47502000000	26396000000	62022000000	49306000000	50859000000	34072000000	27127000000	43253000000	69221000000	55847000000	56093000000	63983000000	70845000000	66821000000	56831000000	69095000000	65039000000	53922000000	55716000000	54477000000	52661000000	53467000000	82580000000	62586000000	53795000000
ACTA2	XP_020927845.1;XP_013838976.1;NP_001158122.1	XP_020927845.1;XP_013838976.1;NP_001158122.1	XP_020927845.1 actin, aortic smooth muscle isoform X1 GN=ACTA2 [Sus scrofa];XP_013838976.1 actin, aortic smooth muscle isoform X1 GN=ACTA2 [Sus scrofa];NP_001158122.1 actin, aortic smooth muscle GN=ACTA2 [Sus scrofa]	1	16	1166700000000	58045000000	46003000000	52594000000	51665000000	62218000000	64607000000	51286000000	55736000000	26664000000	35433000000	19513000000	45131000000	17720000000	42932000000	78837000000	42376000000	38644000000	44590000000	47730000000	24515000000	56707000000	49235000000	50241000000	34802000000	28878000000	40601000000	66645000000	55763000000	55450000000	64399000000	84428000000	68702000000	53489000000	81581000000	60940000000	51362000000	48195000000	55100000000	40097000000	59821000000	76134000000	61845000000	53200000000
VIM	XP_005668163.1;XP_005668164.1;XP_003126153.1;XP_020947259.1;NP_001231260.1	XP_005668163.1;XP_005668164.1	XP_005668163.1 vimentin isoform X1 GN=VIM [Sus scrofa];XP_005668164.1 vimentin isoform X2 GN=VIM [Sus scrofa]	48	55	1162200000000	40706000000	47114000000	78188000000	54432000000	48449000000	65415000000	55554000000	44906000000	22104000000	31505000000	15565000000	37266000000	17499000000	52313000000	76828000000	49574000000	38646000000	62365000000	46760000000	24661000000	49965000000	48860000000	52490000000	38776000000	26743000000	35526000000	43184000000	53539000000	80916000000	66024000000	55169000000	64618000000	58003000000	57239000000	62684000000	46037000000	47827000000	46897000000	50461000000	68444000000	70899000000	75594000000	55240000000
TF	NP_001231582.1	NP_001231582.1	NP_001231582.1 serotransferrin precursor GN=TF [Sus scrofa]	50	58	910510000000	33224000000	16402000000	32228000000	62570000000	38564000000	37720000000	38255000000	40551000000	15696000000	39906000000	15285000000	32167000000	42271000000	104340000000	29850000000	35435000000	32451000000	32966000000	31317000000	35633000000	28991000000	27636000000	31074000000	17613000000	17456000000	40900000000	36015000000	21619000000	34994000000	78249000000	45191000000	37374000000	39651000000	52520000000	43493000000	56486000000	48382000000	37357000000	118410000000	132090000000	28326000000	53664000000	45690000000
AHNAK	XP_013849669.2	XP_013849669.2	XP_013849669.2 LOW QUALITY PROTEIN: neuroblast differentiation-associated protein AHNAK GN=AHNAK [Sus scrofa]	305	305	815520000000	31767000000	33459000000	42812000000	35027000000	36522000000	43483000000	42442000000	30424000000	17202000000	25164000000	15718000000	32472000000	14387000000	28434000000	47220000000	27468000000	29660000000	41678000000	33405000000	15196000000	39433000000	32122000000	36923000000	31279000000	18317000000	33502000000	34207000000	40065000000	44366000000	42150000000	44049000000	41340000000	42870000000	39182000000	46227000000	36341000000	48878000000	41128000000	41859000000	38939000000	43632000000	39817000000	42404000000
LOC100152327	NP_001230248.1	NP_001230248.1	NP_001230248.1 immunoglobulin lambda-like polypeptide 5 precursor GN=LOC100152327 [Sus scrofa]	7	9	777050000000	59349000000	33482000000	27975000000	59056000000	34304000000	29466000000	16648000000	42381000000	18250000000	23526000000	8136300000	22286000000	28241000000	28201000000	17062000000	62892000000	50928000000	28595000000	49132000000	18566000000	12143000000	31626000000	31231000000	10235000000	15687000000	17652000000	53223000000	38602000000	23692000000	55214000000	30598000000	25880000000	14632000000	53317000000	48186000000	43709000000	28069000000	26799000000	93113000000	40113000000	14422000000	78368000000	68456000000
MYH11	XP_020941824.1	XP_020941824.1	XP_020941824.1 LOW QUALITY PROTEIN: myosin-11 GN=MYH11 [Sus scrofa]	131	141	739290000000	42183000000	30566000000	34689000000	32170000000	49176000000	46250000000	35554000000	34483000000	15978000000	20953000000	9557100000	26776000000	9380400000	25147000000	49586000000	30067000000	19990000000	28745000000	27862000000	12722000000	39460000000	29312000000	32497000000	18947000000	14827000000	22409000000	47110000000	36722000000	36247000000	39510000000	56053000000	44891000000	37330000000	45613000000	40510000000	30224000000	28730000000	33839000000	28201000000	35089000000	43706000000	42847000000	30028000000
CBR2	NP_998992.1	NP_998992.1	NP_998992.1 carbonyl reductase 2 GN=CBR2 [Sus scrofa]	16	16	738630000000	39349000000	37127000000	28868000000	38953000000	43399000000	37937000000	33127000000	25327000000	12657000000	19006000000	14589000000	45565000000	8736300000	21383000000	43557000000	14641000000	26050000000	25154000000	31325000000	13510000000	32246000000	27448000000	27530000000	36311000000	28736000000	26093000000	39852000000	42241000000	28773000000	44847000000	49120000000	34312000000	31924000000	31477000000	33773000000	28533000000	52075000000	49804000000	26269000000	24809000000	35099000000	20524000000	37675000000
ANXA2	XP_013848366.1;XP_005659594.1;NP_001005726.1	XP_013848366.1;XP_005659594.1;NP_001005726.1	XP_013848366.1 annexin A2 isoform X1 GN=ANXA2 [Sus scrofa];XP_005659594.1 annexin A2 isoform X1 GN=ANXA2 [Sus scrofa];NP_001005726.1 annexin A2 GN=ANXA2 [Sus scrofa]	39	39	690230000000	26886000000	32656000000	34340000000	27540000000	31227000000	32583000000	35199000000	21540000000	10829000000	20550000000	10701000000	29956000000	9033900000	21907000000	41686000000	22107000000	29696000000	40818000000	30110000000	15964000000	31866000000	28684000000	35693000000	25130000000	15533000000	28000000000	29274000000	41263000000	37509000000	34108000000	38406000000	32500000000	36062000000	28984000000	34865000000	32751000000	37115000000	37446000000	29419000000	28648000000	36930000000	32817000000	43277000000
TGM2	XP_003360037.3;XP_013848555.2	XP_003360037.3	XP_003360037.3 protein-glutamine gamma-glutamyltransferase 2 GN=TGM2 [Sus scrofa]	49	49	645940000000	32252000000	20883000000	26027000000	22360000000	25791000000	39051000000	30919000000	22142000000	10564000000	19217000000	8791200000	26525000000	9610800000	18496000000	39491000000	24125000000	18501000000	37312000000	44434000000	13877000000	25475000000	31054000000	26614000000	29581000000	18823000000	24027000000	34760000000	25169000000	26221000000	26098000000	27244000000	36701000000	34056000000	30102000000	29307000000	28913000000	29991000000	32536000000	26058000000	24992000000	32462000000	31812000000	26997000000
COL6A3	XP_020931400.1	XP_020931400.1	XP_020931400.1 LOW QUALITY PROTEIN: collagen alpha-3(VI) chain GN=COL6A3 [Sus scrofa]	155	155	573140000000	17738000000	23607000000	26845000000	22756000000	42394000000	28194000000	36623000000	12950000000	5396300000	9634200000	8603000000	34382000000	10331000000	18409000000	29313000000	25818000000	15521000000	37701000000	28318000000	6095400000	36313000000	10124000000	34458000000	8144400000	16397000000	27073000000	20095000000	30259000000	28194000000	27539000000	48261000000	28592000000	37273000000	18284000000	16346000000	15107000000	29140000000	41607000000	31243000000	24833000000	27171000000	36627000000	24795000000
A2M	XP_020948035.1;XP_013843850.2	XP_020948035.1;XP_013843850.2	XP_020948035.1 alpha-2-macroglobulin isoform X2 GN=A2M [Sus scrofa];XP_013843850.2 alpha-2-macroglobulin isoform X1 GN=A2M [Sus scrofa]	74	78	553480000000	22682000000	11177000000	18221000000	33408000000	26459000000	17764000000	17039000000	28144000000	10183000000	25086000000	7243600000	23521000000	24365000000	59176000000	15691000000	22700000000	22482000000	18534000000	25738000000	17978000000	16993000000	18947000000	19962000000	13544000000	19976000000	16471000000	27384000000	14262000000	20561000000	41510000000	31401000000	18268000000	18201000000	38245000000	27231000000	37090000000	22501000000	28541000000	68295000000	75655000000	14326000000	32663000000	35259000000
TUBB4B	XP_003122400.2	XP_003122400.2	XP_003122400.2 tubulin beta-4B chain GN=TUBB4B [Sus scrofa]	1	30	534590000000	23445000000	19107000000	24445000000	23070000000	20100000000	31116000000	27936000000	22364000000	10504000000	18351000000	8415700000	22109000000	8469500000	21166000000	37777000000	17664000000	17205000000	20598000000	19504000000	11644000000	26110000000	25487000000	22376000000	20627000000	13711000000	21290000000	24643000000	22689000000	25422000000	27778000000	24320000000	28259000000	27426000000	27363000000	26688000000	25003000000	26177000000	26288000000	24385000000	26263000000	32133000000	25159000000	23343000000
LOC396781	NP_998993.1;CON__ENSEMBL:ENSBTAP00000024466;CON__ENSEMBL:ENSBTAP00000024462	NP_998993.1	NP_998993.1 IgG heavy chain precursor GN=LOC396781 [Sus scrofa]	20	21	505650000000	28745000000	23649000000	11455000000	30178000000	25575000000	13116000000	13739000000	25375000000	13599000000	16015000000	6830400000	16386000000	24242000000	43817000000	11622000000	29027000000	24526000000	20553000000	21072000000	12014000000	12491000000	21334000000	19872000000	11353000000	15100000000	13969000000	27985000000	28540000000	13437000000	42487000000	20453000000	13932000000	16159000000	34464000000	33718000000	24490000000	21908000000	16361000000	68597000000	67576000000	11755000000	39582000000	35125000000
TLN1	XP_020921327.1;XP_020921321.1;XP_020921315.1	XP_020921327.1;XP_020921321.1;XP_020921315.1	XP_020921327.1 talin-1 isoform X3 GN=TLN1 [Sus scrofa];XP_020921321.1 talin-1 isoform X2 GN=TLN1 [Sus scrofa];XP_020921315.1 talin-1 isoform X2 GN=TLN1 [Sus scrofa]	2	131	498430000000	24653000000	18700000000	21848000000	22524000000	20643000000	26821000000	24632000000	20647000000	9268400000	18897000000	7385000000	21502000000	7953600000	16916000000	29412000000	17167000000	15415000000	20604000000	21971000000	9721400000	26477000000	21833000000	20717000000	18532000000	13843000000	20350000000	29423000000	23176000000	24413000000	26516000000	25758000000	26358000000	24989000000	26019000000	26387000000	26531000000	25537000000	25920000000	24129000000	22542000000	27233000000	25830000000	23724000000
VCL	XP_005671131.1;XP_005671130.1;NP_999099.1;XP_020927737.1	XP_005671131.1;XP_005671130.1;NP_999099.1;XP_020927737.1	XP_005671131.1 vinculin isoform X3 GN=VCL [Sus scrofa];XP_005671130.1 vinculin isoform X2 GN=VCL [Sus scrofa];NP_999099.1 vinculin GN=VCL [Sus scrofa];XP_020927737.1 vinculin isoform X1 GN=VCL [Sus scrofa]	70	70	458010000000	20518000000	15621000000	19876000000	21551000000	21189000000	25504000000	20619000000	17990000000	8410600000	13923000000	7374800000	18137000000	7029000000	13924000000	30372000000	16074000000	14590000000	21111000000	19525000000	10269000000	24318000000	20185000000	20675000000	17418000000	12244000000	19559000000	24084000000	20400000000	22375000000	26061000000	26352000000	24611000000	21392000000	23756000000	24121000000	20834000000	24260000000	23193000000	20705000000	19753000000	27307000000	24459000000	22332000000
H2BC11	XP_020955502.1;XP_020954093.1;XP_020945588.1;XP_020939042.1;XP_013852659.1;XP_003355262.2	XP_020955502.1;XP_020954093.1;XP_020945588.1;XP_020939042.1;XP_013852659.1;XP_003355262.2	XP_020955502.1 histone H2B type 1-J GN=LOC110261670 [Sus scrofa];XP_020954093.1 histone H2B type 1-B GN=LOC110261486 [Sus scrofa];XP_020945588.1 histone H2B type 2-E GN=LOC100738744 [Sus scrofa];XP_020939042.1 histone H2B type 3-B GN=LOC100515302 [Sus scro	2	4	444700000000	23215000000	20802000000	18537000000	15326000000	18674000000	22828000000	18473000000	19645000000	9365700000	16773000000	8512400000	15943000000	7612200000	16934000000	21161000000	15315000000	21434000000	19193000000	19034000000	8674100000	19263000000	20513000000	15517000000	17808000000	15572000000	18571000000	22854000000	24405000000	23958000000	22582000000	23756000000	27614000000	22841000000	23724000000	19314000000	21580000000	25285000000	20209000000	21132000000	21326000000	26133000000	22420000000	25839000000
LMNA	XP_020944105.1;XP_020944104.1;XP_020944103.1;XP_020944102.1;XP_020944101.1;XP_020944100.1;XP_020944099.1;XP_020944098.1;XP_013852415.1;XP_005663329.1;NP_001104727.2	XP_020944105.1;XP_020944104.1;XP_020944103.1;XP_020944102.1;XP_020944101.1;XP_020944100.1;XP_020944099.1;XP_020944098.1;XP_013852415.1;XP_005663329.1;NP_001104727.2	XP_020944105.1 prelamin-A/C isoform X1 GN=LMNA [Sus scrofa];XP_020944104.1 prelamin-A/C isoform X1 GN=LMNA [Sus scrofa];XP_020944103.1 prelamin-A/C isoform X1 GN=LMNA [Sus scrofa];XP_020944102.1 prelamin-A/C isoform X1 GN=LMNA [Sus scrofa];XP_020944101.1 p	49	50	442220000000	15963000000	17524000000	25484000000	22171000000	21496000000	28425000000	20970000000	13193000000	7399200000	10940000000	6420400000	14853000000	6257400000	16409000000	32764000000	15711000000	14785000000	24345000000	18892000000	9071400000	19782000000	16369000000	20425000000	17640000000	9965700000	14964000000	18494000000	20550000000	26486000000	25351000000	24110000000	25756000000	21413000000	17409000000	20110000000	15832000000	20466000000	18521000000	17413000000	20752000000	26948000000	22585000000	21198000000
ANXA5	XP_003129266.2	XP_003129266.2	XP_003129266.2 annexin A5 GN=ANXA5 [Sus scrofa]	33	34	431720000000	18213000000	18372000000	23567000000	17748000000	17915000000	22036000000	23031000000	15517000000	9366900000	17006000000	9010100000	17371000000	7389900000	15674000000	23959000000	13647000000	13283000000	17581000000	16714000000	8374500000	21399000000	20466000000	17747000000	16820000000	13207000000	16310000000	21898000000	22901000000	26160000000	23016000000	21496000000	23205000000	24140000000	25576000000	23008000000	27976000000	23146000000	21958000000	21012000000	20898000000	22422000000	21188000000	19934000000
TUBA1B	NP_001038009.1	NP_001038009.1	NP_001038009.1 tubulin alpha-1B chain GN=TUBA1B [Sus scrofa]	0	28	424230000000	18639000000	16489000000	19835000000	16774000000	16427000000	25623000000	21080000000	18464000000	10661000000	14711000000	7441600000	16874000000	7870100000	15049000000	27266000000	12754000000	14340000000	15746000000	15291000000	9964500000	21635000000	20955000000	15705000000	14475000000	11743000000	18413000000	21786000000	20450000000	22007000000	20509000000	19757000000	25191000000	22621000000	25790000000	28171000000	22645000000	23367000000	21956000000	23167000000	21722000000	24907000000	18923000000	21503000000
SPTAN1	XP_013849361.2	XP_013849361.2	XP_013849361.2 LOW QUALITY PROTEIN: spectrin alpha chain, non-erythrocytic 1 GN=SPTAN1 [Sus scrofa]	184	184	420570000000	17598000000	16654000000	21436000000	19594000000	15375000000	27031000000	22822000000	14731000000	7584700000	14184000000	6480100000	15228000000	7034800000	14644000000	26548000000	14671000000	14012000000	18840000000	15905000000	8440000000	21184000000	18918000000	16269000000	16551000000	9832800000	18998000000	20317000000	20388000000	22895000000	23720000000	18118000000	24655000000	23113000000	19778000000	20510000000	20211000000	20181000000	18619000000	19484000000	19835000000	23884000000	22218000000	20801000000
TAGLN	NP_001231079.1;XP_005667427.1;XP_005667428.1	NP_001231079.1;XP_005667427.1;XP_005667428.1	NP_001231079.1 transgelin GN=TAGLN [Sus scrofa];XP_005667427.1 transgelin isoform X1 GN=TAGLN [Sus scrofa];XP_005667428.1 transgelin isoform X2 GN=TAGLN [Sus scrofa]	22	22	385930000000	17434000000	12948000000	16603000000	17928000000	27251000000	20722000000	14567000000	20365000000	8991700000	10942000000	6213100000	12391000000	4691800000	10046000000	28044000000	15226000000	9580800000	18357000000	16081000000	7619000000	21164000000	16486000000	20484000000	13064000000	8521600000	10212000000	19670000000	15165000000	18158000000	20447000000	27204000000	20226000000	14934000000	24026000000	21459000000	14455000000	18256000000	15774000000	12610000000	15102000000	24806000000	22842000000	15091000000
TPM1	XP_020940135.1	XP_020940135.1	XP_020940135.1 tropomyosin alpha-1 chain isoform X3 GN=TPM1 [Sus scrofa]	0	33	365770000000	18888000000	14577000000	18282000000	17078000000	19405000000	21703000000	16214000000	15969000000	7726500000	8735300000	5267200000	12666000000	4663800000	12059000000	29316000000	16623000000	12236000000	15204000000	12689000000	5376700000	17834000000	14161000000	17689000000	11075000000	7149100000	13183000000	17613000000	15474000000	17061000000	18300000000	22708000000	17229000000	14501000000	19449000000	18213000000	12590000000	15211000000	14031000000	12266000000	14005000000	23682000000	20117000000	15690000000
SPTBN1	XP_020943881.1;XP_020943880.1;XP_020943879.1;XP_020943878.1;XP_020943877.1;XP_020943883.1	XP_020943881.1;XP_020943880.1;XP_020943879.1;XP_020943878.1;XP_020943877.1;XP_020943883.1	XP_020943881.1 spectrin beta chain, non-erythrocytic 1 isoform X1 GN=SPTBN1 [Sus scrofa];XP_020943880.1 spectrin beta chain, non-erythrocytic 1 isoform X1 GN=SPTBN1 [Sus scrofa];XP_020943879.1 spectrin beta chain, non-erythrocytic 1 isoform X1 GN=SPTBN1 [S	3	168	364670000000	15406000000	14231000000	17162000000	16639000000	12975000000	22694000000	19464000000	12813000000	6791000000	12813000000	5959200000	12592000000	6031500000	12491000000	22767000000	12711000000	12852000000	16754000000	14289000000	7052900000	18533000000	18150000000	13934000000	14081000000	8880500000	16608000000	17876000000	17991000000	18472000000	20611000000	15818000000	22682000000	20485000000	17372000000	19182000000	18671000000	18972000000	16051000000	17713000000	16876000000	21044000000	18711000000	18718000000
GAPDH	NP_001193288.1;XP_020946773.1	NP_001193288.1;XP_020946773.1	NP_001193288.1 glyceraldehyde-3-phosphate dehydrogenase GN=GAPDH [Sus scrofa];XP_020946773.1 glyceraldehyde-3-phosphate dehydrogenase isoform X1 GN=GAPDH [Sus scrofa]	20	22	345050000000	18298000000	14625000000	17994000000	16188000000	14092000000	18885000000	16569000000	12036000000	5449500000	10878000000	4814200000	14594000000	4772300000	15040000000	18252000000	10803000000	10971000000	15426000000	17227000000	7619100000	17268000000	15022000000	12382000000	11654000000	9989000000	14205000000	19435000000	17314000000	19632000000	18668000000	16072000000	18334000000	17048000000	16361000000	16584000000	16877000000	18493000000	17917000000	16206000000	19536000000	16394000000	17252000000	16639000000
EEF1A1	XP_005654459.1;NP_001090887.1	XP_005654459.1;NP_001090887.1	XP_005654459.1 elongation factor 1-alpha 1 isoform X1 GN=EEF1A1 [Sus scrofa];NP_001090887.1 elongation factor 1-alpha 1 GN=EEF1A1 [Sus scrofa]	14	23	333690000000	16201000000	14455000000	17707000000	14999000000	12597000000	19233000000	16195000000	13367000000	6175100000	11078000000	5886200000	12940000000	6215700000	14138000000	20922000000	11025000000	9883000000	12862000000	15492000000	9401700000	15671000000	11481000000	12002000000	9525600000	10145000000	14095000000	19163000000	17416000000	16039000000	18622000000	16308000000	19790000000	19047000000	19067000000	14259000000	16847000000	13943000000	17573000000	16631000000	20978000000	18722000000	15867000000	14925000000
DES	NP_001001535.1;XP_020930326.1	NP_001001535.1;XP_020930326.1	NP_001001535.1 desmin GN=DES [Sus scrofa];XP_020930326.1 desmin isoform X1 GN=DES [Sus scrofa]	44	44	330490000000	19892000000	15719000000	14397000000	11817000000	22824000000	15894000000	12952000000	17349000000	7780900000	9078000000	3238500000	11689000000	3870500000	8573600000	20160000000	12994000000	11647000000	14882000000	12853000000	6070700000	15473000000	12132000000	19785000000	11804000000	8319300000	9298500000	20520000000	18324000000	14587000000	13981000000	25764000000	15815000000	13479000000	23774000000	23344000000	13868000000	11084000000	14648000000	11921000000	12066000000	18527000000	20236000000	16665000000
C3	XP_020936478.1;NP_999174.1	XP_020936478.1;NP_999174.1	XP_020936478.1 complement C3 isoform X1 GN=C3 [Sus scrofa];NP_999174.1 complement C3 precursor GN=C3 [Sus scrofa]	83	104	324430000000	14107000000	10178000000	9870200000	16255000000	16283000000	9157600000	8609800000	18917000000	7280600000	15482000000	3598900000	16668000000	16429000000	42647000000	6228200000	16308000000	13456000000	10652000000	8378400000	11999000000	8842700000	10673000000	10662000000	6281400000	7000900000	8464700000	15607000000	12668000000	10645000000	18940000000	18519000000	9225600000	9969800000	25578000000	17946000000	21970000000	10776000000	20290000000	43579000000	52151000000	5765000000	21947000000	18942000000
HSP90AA1	NP_999138.1	NP_999138.1	NP_999138.1 heat shock protein HSP 90-alpha GN=HSP90AA1 [Sus scrofa]	33	50	306760000000	14898000000	14534000000	14639000000	11442000000	10858000000	17087000000	13433000000	11767000000	6079200000	9561000000	4160200000	11853000000	4499200000	9353100000	19275000000	10921000000	11298000000	12780000000	14605000000	6271700000	12409000000	16275000000	12448000000	13067000000	10128000000	13117000000	16888000000	17811000000	15872000000	14238000000	13683000000	17273000000	14838000000	16728000000	16642000000	14058000000	14109000000	15441000000	13146000000	14008000000	17817000000	16706000000	17050000000
-	CON__P15636	CON__P15636		13	13	303880000000	14278000000	9107800000	13662000000	12361000000	14448000000	15159000000	15348000000	11741000000	19126000000	12945000000	4720900000	9537600000	4633200000	14289000000	15015000000	12714000000	12420000000	12728000000	7515400000	6778600000	10407000000	9767000000	10723000000	13371000000	9609400000	11476000000	17963000000	13385000000	16138000000	18895000000	24484000000	16241000000	17271000000	14243000000	32562000000	16347000000	9405800000	13247000000	11012000000	20454000000	16718000000	19363000000	20314000000
ACTN1	NP_001229990.1	NP_001229990.1	NP_001229990.1 alpha-actinin-1 GN=ACTN1 [Sus scrofa]	37	66	293790000000	12337000000	10180000000	14554000000	12060000000	11726000000	17083000000	13619000000	13470000000	6248500000	9759800000	4303600000	10229000000	4774400000	10744000000	23892000000	11112000000	8839800000	12093000000	11553000000	7116700000	16667000000	11597000000	12237000000	9187000000	6965000000	11440000000	13405000000	12731000000	15460000000	14609000000	14993000000	16583000000	14028000000	17597000000	17226000000	14055000000	13892000000	12664000000	13473000000	13766000000	20676000000	15920000000	13169000000
MYL6	XP_005655646.1	XP_005655646.1	XP_005655646.1 myosin light polypeptide 6 isoform X3 GN=MYL6 [Sus scrofa]	1	12	291750000000	13603000000	11501000000	13836000000	11535000000	12195000000	15163000000	12652000000	13106000000	6168700000	9370200000	4102600000	9807200000	3989700000	9879500000	21240000000	12509000000	9663200000	14028000000	13221000000	6271900000	14456000000	14268000000	11657000000	8882700000	8016400000	10626000000	15640000000	13606000000	14907000000	13340000000	14428000000	14644000000	13848000000	18952000000	17283000000	15032000000	13205000000	12500000000	11467000000	12468000000	19870000000	18606000000	14109000000
NPG4	NP_999028.1	NP_999028.1	NP_999028.1 protegrin-4 precursor GN=NPG4 [Sus scrofa]	5	18	289890000000	22548000000	18621000000	6356100000	7911600000	11676000000	6292900000	7636800000	19267000000	8134800000	10400000000	2886300000	15506000000	8096900000	15020000000	2546100000	9795300000	33071000000	10336000000	11203000000	1066700000	7675100000	17294000000	9596900000	9592600000	9695900000	7662400000	27999000000	23827000000	6612500000	10399000000	15114000000	6796100000	9361300000	25250000000	19027000000	15387000000	10420000000	19663000000	23978000000	20121000000	2306700000	13059000000	58960000000
PPIA	NP_999518.1;XP_020934178.1;XP_013841254.1	NP_999518.1;XP_020934178.1;XP_013841254.1	NP_999518.1 peptidyl-prolyl cis-trans isomerase A GN=PPIA [Sus scrofa];XP_020934178.1 peptidyl-prolyl cis-trans isomerase A isoform X2 GN=PPIA [Sus scrofa];XP_013841254.1 peptidyl-prolyl cis-trans isomerase A isoform X1 GN=PPIA [Sus scrofa]	11	12	274800000000	11743000000	11358000000	14088000000	11545000000	9436300000	14906000000	13128000000	10752000000	5916700000	9894600000	4829900000	10883000000	4825900000	10149000000	19631000000	8420800000	8738000000	12201000000	11027000000	5925800000	14097000000	12574000000	10529000000	8368500000	7817300000	12017000000	12500000000	13126000000	14885000000	12797000000	11175000000	13803000000	12322000000	13555000000	16252000000	14961000000	15859000000	12593000000	13440000000	12032000000	16200000000	13543000000	12358000000
FGB	NP_001231042.1;CON__P02676	NP_001231042.1	NP_001231042.1 fibrinogen beta chain precursor GN=FGB [Sus scrofa]	33	33	270800000000	10272000000	6902300000	6697300000	13731000000	15333000000	4002000000	4960100000	15845000000	5715600000	12003000000	2615000000	17855000000	14618000000	28723000000	3060800000	14321000000	17853000000	10859000000	11445000000	4377500000	6219400000	6807500000	12660000000	7427700000	12278000000	4218300000	11562000000	9476200000	7929700000	18786000000	17611000000	4815200000	5705100000	21346000000	15547000000	18965000000	8937100000	22282000000	42057000000	38625000000	3518500000	21621000000	25564000000
LOC100125542	XP_020937735.1	XP_020937735.1	XP_020937735.1 immunoglobulin heavy variable 3-23 GN=LOC100125542 [Sus scrofa]	2	4	257280000000	14293000000	10473000000	8950000000	14151000000	13464000000	7352300000	6286800000	14267000000	7890300000	8676100000	3584200000	10997000000	11241000000	11682000000	6113700000	16065000000	13628000000	11741000000	8464800000	7173400000	5989200000	12223000000	10678000000	7102900000	7629600000	7160600000	16013000000	12345000000	8465700000	21372000000	17028000000	7462000000	6761900000	21356000000	21118000000	15042000000	13590000000	12762000000	28895000000	19345000000	5192800000	24183000000	22878000000
FN1	XP_003133690.2	XP_003133690.2	XP_003133690.2 LOW QUALITY PROTEIN: fibronectin GN=FN1 [Sus scrofa]	99	99	257160000000	11235000000	9436000000	13856000000	13745000000	10242000000	15153000000	14131000000	12852000000	5395800000	8366400000	4050200000	7998000000	7602000000	15751000000	17622000000	9901100000	5600900000	9811200000	9011500000	6659100000	10656000000	7930900000	9752700000	4292200000	5969700000	10135000000	12907000000	12039000000	14781000000	17316000000	12105000000	14139000000	13926000000	17217000000	14825000000	13006000000	12564000000	9906400000	21313000000	20547000000	15200000000	14802000000	9165200000
HP	NP_999165.1;XP_005664416.1	NP_999165.1;XP_005664416.1	NP_999165.1 haptoglobin precursor GN=HP [Sus scrofa];XP_005664416.1 haptoglobin isoform X1 GN=HP [Sus scrofa]	21	21	254010000000	14050000000	11206000000	9035500000	14931000000	19237000000	2521200000	3068900000	17744000000	7185600000	18492000000	3293200000	21006000000	6135100000	16528000000	1361300000	13845000000	10960000000	7486500000	11462000000	2989100000	2716700000	12912000000	7358300000	5498100000	9756800000	3228000000	16253000000	14746000000	7976500000	17020000000	23696000000	2968000000	4062300000	20156000000	17572000000	23030000000	9614300000	24235000000	15431000000	20862000000	1501500000	20581000000	17034000000
MSN	XP_013841673.1;NP_001009578.1	XP_013841673.1;NP_001009578.1	XP_013841673.1 moesin isoform X1 GN=MSN [Sus scrofa];NP_001009578.1 moesin GN=MSN [Sus scrofa]	31	43	253280000000	11294000000	12197000000	13360000000	9792500000	9785400000	14637000000	16197000000	9098800000	4634000000	10180000000	4905800000	10469000000	4723300000	7163700000	12353000000	8004200000	8847900000	9387500000	10777000000	4448400000	12861000000	11571000000	9238000000	8094900000	7687900000	11576000000	12603000000	13934000000	13832000000	11896000000	11959000000	14166000000	16560000000	12312000000	11878000000	13984000000	12636000000	12848000000	10278000000	11046000000	11419000000	11083000000	11456000000
TAGLN2	XP_020945244.1;XP_020945242.1;XP_013852337.1;XP_005663269.1;XP_003355153.1;XP_003125720.2;XP_020926049.1;XP_020926048.1	XP_020945244.1;XP_020945242.1;XP_013852337.1;XP_005663269.1;XP_003355153.1;XP_003125720.2	XP_020945244.1 transgelin-2 GN=TAGLN2 [Sus scrofa];XP_020945242.1 transgelin-2 GN=TAGLN2 [Sus scrofa];XP_013852337.1 transgelin-2 GN=TAGLN2 [Sus scrofa];XP_005663269.1 transgelin-2 GN=TAGLN2 [Sus scrofa];XP_003355153.1 transgelin-2 GN=TAGLN2 [Sus scrofa];X	20	20	250670000000	10676000000	9995800000	14020000000	11217000000	9045000000	12842000000	11700000000	8492100000	4276800000	7841700000	3985700000	9452900000	3360900000	8487000000	20107000000	8782800000	8488800000	11770000000	8796800000	5413600000	13407000000	11609000000	10908000000	8516700000	5472300000	12004000000	11668000000	12335000000	13876000000	13170000000	11098000000	13023000000	12891000000	11927000000	11160000000	12792000000	11085000000	12032000000	9384500000	11612000000	18572000000	12852000000	12475000000
H2AX	XP_003129998.3;XP_001925399.1;XP_020945584.1	XP_003129998.3;XP_001925399.1;XP_020945584.1	XP_003129998.3 histone H2AX GN=LOC100522201 [Sus scrofa];XP_001925399.1 histone H2A type 1-A GN=LOC100153329 [Sus scrofa];XP_020945584.1 histone H2A type 2-B GN=LOC100154181 [Sus scrofa]	2	6	244770000000	13031000000	12841000000	11638000000	10261000000	9051100000	11812000000	11003000000	9818100000	4366900000	6505700000	4136800000	10282000000	4643700000	7774000000	12737000000	10350000000	14082000000	6781100000	12536000000	4754000000	11975000000	9341800000	9641500000	8203200000	7023700000	10176000000	12958000000	13237000000	11927000000	12570000000	12519000000	13791000000	11720000000	12939000000	8735100000	9894600000	9455000000	13068000000	12498000000	11874000000	11353000000	15590000000	17746000000
FGG	XP_005666850.1;NP_001231453.1	XP_005666850.1;NP_001231453.1	XP_005666850.1 fibrinogen gamma chain isoform X1 GN=FGG [Sus scrofa];NP_001231453.1 fibrinogen gamma chain precursor GN=FGG [Sus scrofa]	25	25	239610000000	8951300000	7285500000	6517600000	14275000000	11225000000	4101500000	4715600000	12893000000	4790900000	11782000000	1920300000	15463000000	11964000000	25922000000	3532600000	12737000000	15094000000	9779400000	10180000000	4413900000	5123000000	6293800000	10498000000	6569400000	9671800000	3907900000	10296000000	9083200000	7058200000	16736000000	15427000000	4311600000	5291200000	16602000000	11899000000	16357000000	6682400000	19515000000	32547000000	32692000000	3495600000	20026000000	22705000000
LOC110257905	XP_020936571.1;XP_005673463.1;NP_001038020.1	XP_020936571.1;XP_005673463.1;NP_001038020.1	XP_020936571.1 thymosin beta-4-like GN=LOC110257905 [Sus scrofa];XP_005673463.1 thymosin beta-4 isoform X1 GN=TMSB4X [Sus scrofa];NP_001038020.1 thymosin beta-4 GN=TMSB4X [Sus scrofa]	4	4	230830000000	10176000000	9946400000	13600000000	10786000000	11846000000	12193000000	10699000000	8297700000	5543800000	8741200000	4680000000	8689500000	4111900000	8377400000	11718000000	8531300000	8259100000	9596700000	9068500000	3623700000	9107600000	10801000000	8147800000	8035900000	6477800000	9770200000	11539000000	12159000000	17465000000	10831000000	14123000000	13251000000	9767900000	12501000000	14586000000	14437000000	13424000000	8736100000	9442100000	10268000000	12719000000	16447000000	10134000000
PLEC	XP_020946044.1;XP_020946040.1;XP_020946039.1	XP_020946044.1;XP_020946040.1;XP_020946039.1	XP_020946044.1 plectin isoform X21 GN=PLEC [Sus scrofa];XP_020946040.1 plectin isoform X17 GN=PLEC [Sus scrofa];XP_020946039.1 plectin isoform X16 GN=PLEC [Sus scrofa]	2	274	230650000000	10574000000	10408000000	14799000000	10580000000	10676000000	15142000000	11916000000	8799500000	4294300000	7326300000	3538300000	8689100000	3542100000	8009300000	14229000000	7912600000	6801800000	9512400000	9427400000	4762900000	10508000000	9535700000	8383600000	6877900000	5253700000	9148900000	11682000000	12366000000	14577000000	12515000000	11848000000	13485000000	11735000000	11680000000	12614000000	11248000000	11923000000	10834000000	11326000000	10893000000	11668000000	11224000000	10418000000
HSPA8	NP_001230836.1	NP_001230836.1	NP_001230836.1 heat shock cognate 71 kDa protein GN=HSPA8 [Sus scrofa]	22	28	229800000000	10211000000	10131000000	12400000000	9182800000	8749500000	11435000000	11262000000	9766700000	5016900000	7928700000	3671400000	9094500000	3552400000	8923800000	13480000000	7832800000	7718200000	9225800000	9758100000	4451000000	10093000000	11617000000	8727800000	7527900000	7772300000	10267000000	12154000000	12967000000	13473000000	11142000000	10252000000	11248000000	11588000000	12817000000	13832000000	12156000000	12318000000	11472000000	11244000000	11984000000	12456000000	11780000000	12016000000
MYH10	XP_020923522.1	XP_020923522.1	XP_020923522.1 LOW QUALITY PROTEIN: myosin-10 GN=MYH10 [Sus scrofa]	108	110	223820000000	7676700000	7451400000	10288000000	8931400000	7804100000	12237000000	10324000000	9598200000	4546100000	7131300000	3450200000	7171900000	3032200000	7866900000	22238000000	8187400000	6679300000	12022000000	8408000000	5042700000	13053000000	8938000000	10739000000	7433700000	5583700000	7981600000	9495700000	9158300000	11228000000	11143000000	9123200000	11442000000	10553000000	11278000000	11261000000	9557300000	10490000000	8972400000	9888400000	10875000000	17755000000	11746000000	10326000000
EHD2	XP_013854004.1;XP_003356007.1	XP_013854004.1;XP_003356007.1	XP_013854004.1 EH domain-containing protein 2 GN=EHD2 [Sus scrofa];XP_003356007.1 EH domain-containing protein 2 GN=EHD2 [Sus scrofa]	39	44	216380000000	9928500000	8820300000	10231000000	8663900000	9973000000	13839000000	11726000000	8280300000	3655700000	7607000000	3276000000	10074000000	3260300000	7247300000	10303000000	5953200000	7108100000	9534300000	9507500000	4378500000	11915000000	9348700000	8631700000	8674000000	5689100000	8759100000	11875000000	10921000000	11284000000	10560000000	11917000000	13410000000	12465000000	11916000000	9709000000	11718000000	10493000000	13107000000	9447400000	10278000000	9714600000	8573600000	10452000000
LOC100525821	XP_020955511.1;XP_020955509.1;XP_020955508.1;XP_020955506.1;XP_020954094.1;XP_020954087.1;XP_020945589.1;XP_005665718.2	XP_020955511.1;XP_020955509.1;XP_020955508.1;XP_020955506.1;XP_020954094.1;XP_020954087.1;XP_020945589.1;XP_005665718.2	XP_020955511.1 LOW QUALITY PROTEIN: uncharacterized protein LOC100525821 GN=LOC100525821 [Sus scrofa];XP_020955509.1 histone H4 GN=LOC110261675 [Sus scrofa];XP_020955508.1 histone H4 GN=LOC110261674 [Sus scrofa];XP_020955506.1 histone H4 GN=LOC110261673 [S	11	16	213080000000	7121900000	8875200000	3453000000	6359100000	7429600000	8107900000	6400600000	13630000000	6091100000	6531100000	5281800000	6418200000	2986400000	4545300000	5282700000	9920300000	27010000000	12999000000	4043700000	1409900000	11567000000	10361000000	9710300000	4953700000	6909200000	15686000000	7832700000	10198000000	4021500000	8563100000	9229600000	8319900000	6841000000	17555000000	16966000000	9502700000	15856000000	7406500000	8304300000	5938200000	5072900000	17284000000	38054000000
-	CON__P00761;XP_020934123.1;XP_020934122.1;XP_020934121.1;XP_020934120.1;XP_020934119.1;NP_001156363.1	CON__P00761;XP_020934123.1;XP_020934122.1;XP_020934121.1;XP_020934120.1;XP_020934119.1;NP_001156363.1	;XP_020934123.1 trypsinogen isoform X1 GN=LOC100302368 [Sus scrofa];XP_020934122.1 trypsinogen isoform X1 GN=LOC100302368 [Sus scrofa];XP_020934121.1 trypsinogen isoform X1 GN=LOC100302368 [Sus scrofa];XP_020934120.1 trypsinogen isoform X1 GN=LOC100302368	5	5	205880000000	7017600000	4352400000	8787700000	7318500000	8482100000	9917700000	7455000000	7600100000	14323000000	10847000000	4643200000	5296500000	2454700000	6897700000	12396000000	12120000000	6202100000	10304000000	4900800000	3102400000	7917300000	8414000000	11876000000	10187000000	5748300000	7317500000	8795800000	6449600000	10142000000	10080000000	11776000000	11227000000	8969600000	11341000000	31122000000	14809000000	10024000000	7396200000	7116700000	10597000000	13124000000	19963000000	10184000000
RPS27A	XP_003125184.3;XP_013846730.1;XP_013846724.1;XP_005652973.1;NP_999376.1;XP_005654051.1;NP_001098779.1;XP_020929677.1;XP_020929676.1;XP_003483459.2	XP_003125184.3;XP_013846730.1;XP_013846724.1;XP_005652973.1;NP_999376.1;XP_005654051.1;NP_001098779.1;XP_020929677.1;XP_020929676.1;XP_003483459.2	XP_003125184.3 ubiquitin-40S ribosomal protein S27a GN=RPS27A [Sus scrofa];XP_013846730.1 ubiquitin-60S ribosomal protein L40 isoform X1 GN=UBA52 [Sus scrofa];XP_013846724.1 ubiquitin-60S ribosomal protein L40 isoform X1 GN=UBA52 [Sus scrofa];XP_005652973.	8	8	199110000000	9258600000	8476200000	9504900000	8327900000	7651800000	10697000000	10230000000	7680900000	4583500000	6600200000	3823700000	7659200000	3460600000	7697700000	10812000000	5446700000	7248600000	8526200000	7597300000	4649300000	9573600000	8540800000	8382700000	6327600000	7281500000	9073900000	11105000000	10517000000	10189000000	10098000000	9505000000	10197000000	10896000000	10183000000	13047000000	9933900000	13330000000	9309300000	10309000000	9618200000	10395000000	8104500000	11402000000
ENO1	XP_020950937.1;XP_020950938.1;XP_020950939.1	XP_020950937.1;XP_020950938.1;XP_020950939.1	XP_020950937.1 alpha-enolase isoform X1 GN=ENO1 [Sus scrofa];XP_020950938.1 alpha-enolase isoform X1 GN=ENO1 [Sus scrofa];XP_020950939.1 alpha-enolase isoform X2 GN=ENO1 [Sus scrofa]	19	26	192280000000	9124500000	8819200000	11304000000	6946400000	7046000000	11074000000	9907800000	7156600000	3655500000	6219300000	2750300000	7492800000	3098800000	7444100000	9915700000	6433100000	6588300000	7570700000	10176000000	3807700000	8803200000	8359300000	6827800000	7238000000	6977300000	7539100000	10085000000	10017000000	11598000000	8908400000	8979700000	10008000000	9485300000	9536100000	10225000000	10061000000	8776000000	8748600000	8964000000	8952600000	8062100000	9604600000	9380800000
FGA	XP_020957143.1;XP_020957142.1	XP_020957143.1;XP_020957142.1	XP_020957143.1 fibrinogen alpha chain isoform X2 GN=FGA [Sus scrofa];XP_020957142.1 fibrinogen alpha chain isoform X1 GN=FGA [Sus scrofa]	34	35	191970000000	6742700000	4848800000	5134100000	10480000000	9420700000	2949900000	3442800000	11000000000	3971900000	8941100000	1982600000	11930000000	11916000000	21362000000	2177500000	9888600000	12601000000	7666100000	7756400000	3792600000	4364600000	4493500000	8344100000	4265800000	8715200000	3782400000	7874400000	6537900000	6232500000	13090000000	12471000000	3124300000	3764100000	14698000000	11284000000	13621000000	6952400000	15399000000	31267000000	25115000000	2422000000	14560000000	19473000000
CFL1	NP_001004043.1	NP_001004043.1	NP_001004043.1 cofilin-1 GN=CFL1 [Sus scrofa]	17	18	191550000000	9783100000	7748400000	9031700000	7570200000	7319900000	10247000000	10228000000	8172700000	4287800000	8041500000	3146900000	7220400000	3773100000	6884700000	11688000000	6076500000	6562900000	6990500000	8047900000	4762900000	9501500000	8551300000	6956500000	5299900000	5494400000	8158600000	10735000000	9453400000	7957800000	8936700000	9210900000	10440000000	10667000000	11645000000	10134000000	12869000000	9862000000	8941700000	9937300000	9320500000	11207000000	9208300000	9392900000
CLTC	XP_020921708.1;XP_020921707.1;NP_001139599.1;XP_020921706.1	XP_020921708.1;XP_020921707.1;NP_001139599.1;XP_020921706.1	XP_020921708.1 clathrin heavy chain 1 isoform X3 GN=CLTC [Sus scrofa];XP_020921707.1 clathrin heavy chain 1 isoform X2 GN=CLTC [Sus scrofa];NP_001139599.1 clathrin heavy chain 1 GN=CLTC [Sus scrofa];XP_020921706.1 clathrin heavy chain 1 isoform X1 GN=CLTC	110	110	185200000000	9077500000	7765200000	9393100000	7899000000	7076800000	10276000000	9076100000	7164500000	3401400000	6755500000	2692400000	7129600000	2827300000	6368200000	11752000000	5987900000	5602100000	8938600000	8726500000	4329400000	9276500000	7942900000	7296300000	5865900000	5346000000	7229300000	10609000000	9527900000	10137000000	9880800000	8445500000	10208000000	9715500000	10168000000	9244500000	10209000000	8913200000	8992000000	8761100000	8920300000	10540000000	8915600000	8570100000
ATP5F1B	XP_001929445.4	XP_001929445.4	XP_001929445.4 ATP synthase subunit beta, mitochondrial GN=ATP5F1B [Sus scrofa]	28	28	183530000000	7815900000	7924300000	10389000000	6689400000	6922800000	10109000000	8384300000	6897300000	3341500000	6542800000	3031900000	7440700000	2928000000	6610000000	11222000000	6186500000	6430800000	8211400000	7805100000	4358100000	9219100000	8114100000	7705500000	6267100000	5867300000	7117300000	8770200000	9165000000	10349000000	8329800000	8333600000	9886500000	9216400000	9335200000	9759700000	9731300000	10223000000	9561600000	8996700000	9538200000	9825900000	9193700000	9730400000
YWHAE	XP_020923210.1;XP_020923211.1	XP_020923210.1;XP_020923211.1	XP_020923210.1 14-3-3 protein epsilon isoform X1 GN=YWHAE [Sus scrofa];XP_020923211.1 14-3-3 protein epsilon isoform X2 GN=YWHAE [Sus scrofa]	20	22	179670000000	8074800000	7111500000	9428500000	6711500000	7209500000	10297000000	10474000000	6163800000	4371600000	6490300000	3480100000	7488700000	3713000000	5149000000	9043300000	5453000000	5864900000	7456000000	7441500000	4182100000	8046600000	8092700000	6273200000	7597200000	5877600000	8180700000	9821200000	9118200000	10100000000	9600500000	8932800000	10098000000	10098000000	9072800000	10403000000	9410100000	9523800000	9965400000	9176500000	9047500000	9010100000	7876300000	9633200000
PKM	XP_020954784.1;XP_020954783.1;XP_001929104.1;XP_020954766.1;XP_020945383.1;XP_020945382.1;XP_020945381.1;XP_020945380.1	XP_020954784.1;XP_020954783.1;XP_001929104.1;XP_020954766.1	XP_020954784.1 pyruvate kinase PKM isoform X8 GN=PKM [Sus scrofa];XP_020954783.1 pyruvate kinase PKM isoform X8 GN=PKM [Sus scrofa];XP_001929104.1 pyruvate kinase PKM isoform X8 GN=PKM [Sus scrofa];XP_020954766.1 poly polymerase 6 isoform X2 GN=PKM [Sus s	5	40	179430000000	7672900000	7718900000	9961600000	7445100000	6406700000	11762000000	9317700000	6698000000	3096900000	6026600000	2590900000	6478700000	2993600000	7955200000	10233000000	5933300000	6079400000	7599600000	8442800000	4009500000	8784900000	7116200000	6172700000	7062600000	4823200000	7046900000	8294900000	9112000000	10163000000	9199100000	7806300000	10767000000	9368900000	8991300000	9013100000	9303000000	7921500000	8061400000	9237300000	9942800000	8943100000	8686800000	8923500000
PFN1	NP_001231345.1;CON__P02584	NP_001231345.1;CON__P02584	NP_001231345.1 profilin-1 GN=PFN1 [Sus scrofa];	12	12	175180000000	9702200000	8962900000	7814400000	7521600000	6478800000	9911500000	9132500000	6182000000	3318300000	7957000000	2633700000	7700300000	3304500000	6834900000	7897200000	5683600000	7038000000	6191400000	8458200000	3211400000	7491100000	8281200000	6370700000	4693700000	5915100000	6495900000	9788000000	9804500000	8849300000	8293400000	7747900000	8869500000	9049600000	7494300000	9447000000	10670000000	8452600000	8741100000	9238800000	8090400000	7265700000	7949900000	9353300000
LOC100623720	XP_020926755.1;XP_020926754.1;XP_020926753.1	XP_020926755.1;XP_020926754.1;XP_020926753.1	XP_020926755.1 collagen alpha-1(VI) chain GN=LOC100623720 [Sus scrofa];XP_020926754.1 collagen alpha-1(VI) chain GN=LOC100623720 [Sus scrofa];XP_020926753.1 collagen alpha-1(VI) chain GN=LOC100623720 [Sus scrofa]	34	34	172930000000	3879500000	6584900000	6469000000	6547100000	13608000000	8908600000	9879100000	3601900000	1732400000	2953500000	2598700000	11039000000	3336500000	5778500000	8870500000	7574300000	5476100000	11562000000	8691500000	1739500000	10462000000	2933600000	11940000000	2865200000	4857400000	9036900000	4871000000	8383000000	7408900000	7853900000	15865000000	8535700000	10767000000	5168100000	4979000000	4757400000	9022200000	13189000000	10391000000	7902300000	8228600000	11728000000	7908000000
ANXA1	NP_001157470.1	NP_001157470.1	NP_001157470.1 annexin A1 GN=ANXA1 [Sus scrofa]	22	22	168080000000	8052100000	8587200000	7036300000	6754400000	6093500000	7278400000	7973100000	7294900000	3834000000	6766600000	3122100000	7382600000	2848900000	5879700000	7075300000	5420300000	9159900000	7201100000	5686900000	2606500000	7534000000	8583300000	7555500000	6512400000	4846500000	6997400000	9292200000	11003000000	7717800000	8437300000	7967200000	7210000000	9048000000	10335000000	10505000000	10336000000	10615000000	9678300000	8248400000	8373800000	6534400000	8068100000	14075000000
DPYSL2	XP_020929234.1;XP_001927831.1;XP_001927836.1	XP_020929234.1;XP_001927831.1;XP_001927836.1	XP_020929234.1 dihydropyrimidinase-related protein 2 isoform X2 GN=DPYSL2 [Sus scrofa];XP_001927831.1 dihydropyrimidinase-related protein 2 isoform X3 GN=DPYSL2 [Sus scrofa];XP_001927836.1 dihydropyrimidinase-related protein 2 isoform X1 GN=DPYSL2 [Sus scr	26	27	167800000000	7285900000	6986300000	9073700000	7520600000	5557100000	9836600000	9588700000	6767200000	3132000000	5936000000	3023500000	6941300000	2726700000	5227800000	10510000000	5158400000	4814900000	7071700000	6420600000	3129700000	9357700000	6472900000	7746400000	6113300000	3947900000	7448300000	7977100000	8439800000	9525000000	9333700000	7627700000	9835800000	10076000000	8364800000	9258200000	8902000000	9297300000	8455200000	8148100000	8033600000	10235000000	8155800000	7818300000
PDIA3	NP_001182041.1	NP_001182041.1	NP_001182041.1 protein disulfide-isomerase A3 precursor GN=PDIA3 [Sus scrofa]	37	37	167180000000	8144000000	7791000000	9423700000	6341900000	5872900000	7783100000	9028000000	6177000000	3627500000	6120400000	3061400000	6030600000	2862800000	6117900000	9885400000	6095600000	5518200000	6594700000	7269200000	3914400000	7289400000	7391200000	6608800000	5238400000	5426900000	7562700000	9496000000	10143000000	9632800000	7555400000	6968400000	8097600000	9096400000	7823300000	9352700000	8826300000	9127400000	7311400000	8708600000	7721200000	8988500000	8280000000	8432100000
CAVIN1	XP_020922642.1	XP_020922642.1	XP_020922642.1 polymerase I and transcript release factor GN=CAVIN1 [Sus scrofa]	19	19	166800000000	7238100000	6496900000	8925600000	6934800000	8008900000	9888800000	8484600000	5835700000	3582000000	5432500000	3180900000	6997000000	2695400000	4541200000	9280800000	5241400000	5095300000	7942500000	6826700000	3305400000	8363900000	7947500000	7024000000	5962300000	4356700000	7214600000	8171100000	8408700000	9349100000	8813600000	9406800000	9935200000	9119700000	7458000000	9499200000	7985200000	9856300000	8938900000	7810300000	6162000000	8776000000	7939500000	8065000000
ITIH4	XP_020924169.1;XP_020924168.1;XP_020924171.1	XP_020924169.1;XP_020924168.1;XP_020924171.1	XP_020924169.1 inter-alpha-trypsin inhibitor heavy chain H4 isoform X2 GN=ITIH4 [Sus scrofa];XP_020924168.1 inter-alpha-trypsin inhibitor heavy chain H4 isoform X1 GN=ITIH4 [Sus scrofa];XP_020924171.1 inter-alpha-trypsin inhibitor heavy chain H4 isoform X4	0	51	166480000000	9554600000	3733900000	5166800000	2914600000	9611600000	842870000	1630400000	11369000000	3680700000	6506000000	609010000	8846300000	2149600000	8118800000	1093200000	8049500000	14709000000	11997000000	16113000000	1545200000	1714400000	5200100000	11415000000	6798100000	11947000000	1164000000	10602000000	4744300000	5793300000	3822000000	11287000000	1064400000	1940700000	14948000000	9247900000	9609300000	2508900000	10671000000	5750000000	11070000000	1209200000	11110000000	19849000000
HSPG2	XP_020951154.1;XP_020951143.1;XP_020951155.1;XP_020951150.1;XP_020951141.1;XP_020951144.1;XP_020951139.1;XP_020951148.1;XP_020951142.1;XP_020951145.1;XP_020951140.1;XP_020951149.1;XP_020951147.1;XP_020951146.1;XP_020951152.1;XP_020951151.1;XP_020951153.1	XP_020951154.1;XP_020951143.1;XP_020951155.1;XP_020951150.1;XP_020951141.1;XP_020951144.1;XP_020951139.1;XP_020951148.1;XP_020951142.1;XP_020951145.1;XP_020951140.1;XP_020951149.1;XP_020951147.1;XP_020951146.1;XP_020951152.1;XP_020951151.1;XP_020951153.1	XP_020951154.1 basement membrane-specific heparan sulfate proteoglycan core protein isoform X16 GN=HSPG2 [Sus scrofa];XP_020951143.1 basement membrane-specific heparan sulfate proteoglycan core protein isoform X5 GN=HSPG2 [Sus scrofa];XP_020951155.1 baseme	149	149	165980000000	6609400000	5805100000	6914500000	7317500000	8839900000	11261000000	9534600000	5845000000	2572400000	4518100000	2485100000	7700700000	2217100000	4592100000	14283000000	5495600000	4317300000	9648000000	7646400000	3020600000	8169700000	5768200000	7225400000	4147700000	3582200000	6465500000	7511800000	7372100000	7718300000	8479700000	9920900000	9654700000	8922200000	7925700000	7511000000	6858300000	8292300000	8865100000	7162700000	6471200000	11724000000	8285100000	6753900000
HSPB1	NP_001007519.1	NP_001007519.1	NP_001007519.1 heat shock protein beta-1 GN=HSPB1 [Sus scrofa]	18	18	161670000000	8017500000	6422000000	6713400000	5843200000	7215700000	7472300000	6788700000	7503200000	3312400000	4524100000	1924900000	7439200000	2417200000	5503500000	8760000000	6905100000	5690500000	7096600000	9040300000	4315600000	6962300000	8427000000	6610500000	5623600000	5026300000	6115400000	10020000000	8655300000	7105100000	7674500000	9141100000	7602900000	7509200000	9760200000	8347900000	6769900000	7042000000	9876700000	5605900000	7608500000	8490700000	9737600000	7903700000
HSPA5	XP_001927830.4;XP_020924489.1	XP_001927830.4;XP_020924489.1	XP_001927830.4 78 kDa glucose-regulated protein isoform X2 GN=HSPA5 [Sus scrofa];XP_020924489.1 78 kDa glucose-regulated protein isoform X1 GN=HSPA5 [Sus scrofa]	35	36	161520000000	7424500000	7570200000	9186800000	6034700000	5633900000	7574700000	6859200000	6137800000	3906600000	5318400000	2687000000	5766500000	3087800000	4994600000	10266000000	6718500000	5384200000	6922700000	6978300000	4299300000	6703200000	7902200000	6847200000	4657100000	5595500000	7060000000	8611900000	9574600000	9795900000	7529000000	6693400000	7602600000	7215300000	8416100000	10118000000	8281900000	8835300000	7121000000	8518700000	7282000000	9543800000	10066000000	8288000000
EEF2	XP_003354050.1;XP_020939748.1	XP_003354050.1;XP_020939748.1	XP_003354050.1 elongation factor 2 isoform X1 GN=EEF2 [Sus scrofa];XP_020939748.1 elongation factor 2 isoform X2 GN=EEF2 [Sus scrofa]	55	56	158070000000	8269300000	6965700000	8108900000	6878500000	5603700000	8717700000	7414400000	7007200000	2691100000	5369100000	2220700000	5769400000	2231900000	5050500000	10997000000	5656100000	4767800000	6567900000	7612900000	3960700000	7006300000	7114700000	5513700000	4605400000	4979700000	6986800000	8972400000	7881400000	8467300000	7897800000	6723900000	8465400000	7501700000	9055700000	7402000000	8301900000	7273700000	6962700000	6847500000	7393400000	9860300000	7971100000	6899500000
HSP90B1	XP_020946788.1;NP_999268.1	XP_020946788.1;NP_999268.1	XP_020946788.1 endoplasmin isoform X1 GN=HSP90B1 [Sus scrofa];NP_999268.1 endoplasmin precursor GN=HSP90B1 [Sus scrofa]	48	49	157830000000	7907500000	7900800000	8330100000	5310300000	5393000000	8129400000	7303200000	5700000000	3563500000	5372700000	2303300000	5274300000	2214500000	4612000000	9313400000	6957400000	4996600000	7035700000	7515900000	4019200000	7031800000	7744900000	6982000000	4790300000	5289800000	6835500000	9037200000	9942000000	9026900000	7117900000	6903100000	8209800000	7624800000	8353800000	8939300000	8084600000	7031400000	7257300000	7011600000	7027100000	8844100000	11188000000	7866000000
APOA1	NP_999563.1	NP_999563.1	NP_999563.1 apolipoprotein A-I preproprotein GN=APOA1 [Sus scrofa]	13	19	157240000000	3544000000	2652700000	5422000000	11526000000	8203600000	4914500000	5070500000	5999100000	2959300000	7285500000	3091500000	8775100000	13533000000	25808000000	2960900000	4892900000	3480400000	2412900000	2690600000	9694900000	5185000000	3207200000	2800000000	1943900000	2683700000	6506900000	4468000000	3402900000	6332100000	15119000000	9862300000	5192100000	5945400000	8435600000	7425600000	9909200000	8570300000	10843000000	39323000000	38159000000	3221600000	7387400000	5394400000
CALM2	XP_003125211.1;NP_001231139.1;NP_001231138.1;NP_001001862.1	XP_003125211.1;NP_001231139.1;NP_001231138.1	XP_003125211.1 calmodulin GN=CALM2 [Sus scrofa];NP_001231139.1 calmodulin GN=CALM1 [Sus scrofa];NP_001231138.1 calmodulin GN=CALM3 [Sus scrofa]	12	12	153300000000	6713300000	5878200000	7878400000	5896000000	5885300000	7856800000	7556300000	5881400000	3926300000	5611800000	3301900000	6210000000	2808800000	5233400000	9162000000	4967600000	4983000000	6744100000	5232700000	3564900000	7272400000	7412700000	6081100000	5536700000	4879300000	6824000000	7871500000	7393100000	8900400000	7964500000	7156000000	7689500000	8691800000	7986500000	9333600000	8430300000	8746300000	8087600000	7453700000	7319000000	8187400000	6815900000	7518300000
ACTN4	XP_003355931.2;XP_003127168.2;XP_020950003.1;XP_003355932.1;XP_005664653.1;XP_003355933.1	XP_003355931.2;XP_003127168.2;XP_020950003.1;XP_003355932.1;XP_005664653.1;XP_003355933.1	XP_003355931.2 alpha-actinin-4 isoform X3 GN=ACTN4 [Sus scrofa];XP_003127168.2 alpha-actinin-4 isoform X1 GN=ACTN4 [Sus scrofa];XP_020950003.1 alpha-actinin-4 isoform X4 GN=ACTN4 [Sus scrofa];XP_003355932.1 alpha-actinin-4 isoform X5 GN=ACTN4 [Sus scrofa];	38	39	150400000000	6167900000	4802900000	7656800000	6441800000	5278700000	7760100000	6460000000	5654100000	2779300000	4363400000	2051700000	4734400000	2237500000	4809600000	12954000000	6268600000	4323900000	6756700000	6433100000	4383700000	8837200000	7469500000	5963100000	4305100000	3838300000	7669200000	6794300000	5960000000	8220600000	7608200000	6252400000	7615300000	6581300000	7421700000	8051700000	7007000000	6815800000	6429900000	7160900000	6514100000	11296000000	9126900000	6461500000
HNRNPA2B1	XP_020934637.1;XP_005673365.1;XP_020934641.1;XP_020934640.1;XP_020934639.1;XP_020934638.1;XP_020934643.1;XP_020934642.1	XP_020934637.1;XP_005673365.1;XP_020934641.1;XP_020934640.1;XP_020934639.1;XP_020934638.1;XP_020934643.1;XP_020934642.1	XP_020934637.1 heterogeneous nuclear ribonucleoproteins A2/B1 isoform X1 GN=HNRNPA2B1 [Sus scrofa];XP_005673365.1 heterogeneous nuclear ribonucleoproteins A2/B1 isoform X1 GN=HNRNPA2B1 [Sus scrofa];XP_020934641.1 heterogeneous nuclear ribonucleoproteins A2	25	25	147960000000	7214300000	6779900000	7968800000	6175800000	5004700000	8423800000	7747300000	5971400000	2659400000	4790900000	2224900000	5438900000	2096900000	5415000000	9536100000	4689100000	5380000000	6079900000	7028300000	3333500000	6131200000	6543900000	5473100000	5128400000	4359300000	6366100000	7873400000	8056800000	8461700000	7640900000	6076400000	8033300000	7841400000	7465800000	7503500000	7198700000	7581700000	6867000000	6193200000	6940600000	8329500000	6879000000	7736300000
IQGAP1	XP_020954569.1;XP_020945330.1;XP_013852411.1	XP_020954569.1	XP_020954569.1 ras GTPase-activating-like protein IQGAP1 GN=IQGAP1 [Sus scrofa]	106	108	145510000000	5917000000	7171300000	7460400000	6152100000	5969000000	8495900000	7789700000	5664000000	2441300000	5298500000	2777800000	6657000000	2015400000	5200100000	7308000000	4638700000	5058800000	6044300000	5838100000	3007900000	7622700000	6396800000	5935600000	4291700000	3797300000	6561900000	6970300000	8788100000	7748100000	7471400000	7411100000	7967100000	8130300000	7600500000	7523300000	8096000000	9529900000	7961000000	6520500000	6682800000	6650900000	6988500000	7483400000
TKT	NP_001106151.1;XP_020923847.1	NP_001106151.1;XP_020923847.1	NP_001106151.1 transketolase GN=TKT [Sus scrofa];XP_020923847.1 transketolase isoform X1 GN=TKT [Sus scrofa]	34	34	143240000000	8668600000	7677800000	6968200000	5571600000	5502600000	8517000000	6996700000	5997900000	2893200000	5942000000	2710600000	5870700000	2147900000	4532800000	5041900000	4121500000	5393300000	5541600000	5559400000	3310900000	6267700000	6679400000	5511800000	5563600000	3853900000	6395400000	8477300000	8741500000	7574300000	6413800000	6661700000	8435800000	7546800000	7729700000	7724000000	8250800000	7191900000	7361100000	7015900000	7010800000	4861600000	6159000000	7578500000
LCP1	XP_005668474.1;XP_001929173.1	XP_005668474.1;XP_001929173.1	XP_005668474.1 plastin-2 GN=LCP1 [Sus scrofa];XP_001929173.1 plastin-2 GN=LCP1 [Sus scrofa]	42	51	142840000000	9657700000	8195900000	7176000000	4857600000	5617300000	8584200000	7984300000	6442600000	2644200000	7190800000	1939600000	6700200000	2055300000	5333200000	3986800000	3617300000	5558600000	4193900000	7507200000	1690900000	5301700000	7187400000	4200500000	4489600000	5807500000	4916500000	11212000000	9670700000	7761300000	6412800000	6759300000	8711400000	8889100000	8165900000	7214500000	9882900000	6959000000	8364700000	6869900000	7046100000	4190400000	5385600000	8507800000
KRT8	NP_001153087.1;XP_020947339.1;XP_020947338.1;XP_020947337.1;CON__REFSEQ:XP_932229	NP_001153087.1	NP_001153087.1 keratin, type II cytoskeletal 8 GN=KRT8 [Sus scrofa]	25	42	141310000000	4037400000	5380800000	7343100000	5621200000	4834700000	7960400000	7520000000	3958100000	2123500000	3453000000	2054700000	7560300000	1712500000	11738000000	10057000000	2369400000	5804100000	5787500000	3723700000	4603900000	5587100000	4815000000	4475500000	8416800000	3951700000	6418100000	4441300000	6834900000	7601500000	7030400000	5801100000	7834000000	8464700000	5512400000	5405900000	5367000000	6598100000	9491200000	5169200000	16295000000	8619000000	3651600000	8268400000
YWHAZ	XP_020944416.1;XP_020944415.1;XP_005663006.1;XP_001927263.3;NP_001302655.1	XP_020944416.1;XP_020944415.1;XP_005663006.1;XP_001927263.3;NP_001302655.1	XP_020944416.1 14-3-3 protein zeta/delta isoform X1 GN=YWHAZ [Sus scrofa];XP_020944415.1 14-3-3 protein zeta/delta isoform X1 GN=YWHAZ [Sus scrofa];XP_005663006.1 14-3-3 protein zeta/delta isoform X1 GN=YWHAZ [Sus scrofa];XP_001927263.3 14-3-3 protein zeta	17	19	139580000000	6193400000	5416300000	7383300000	6431500000	5944900000	8038600000	7970100000	6097500000	2566800000	5291400000	2055000000	5727300000	1756900000	5494100000	8302800000	4402300000	4463100000	6260300000	5246600000	2575300000	6708700000	6379100000	5106000000	4834700000	3500400000	5437400000	6951000000	6514100000	7196300000	7558100000	6852000000	7446100000	7928600000	6845900000	6733700000	6771100000	6461700000	6449500000	5211100000	6294000000	7212000000	6616300000	6896400000
HPX	NP_999118.1;XP_020957866.1	NP_999118.1;XP_020957866.1	NP_999118.1 hemopexin precursor GN=HPX [Sus scrofa];XP_020957866.1 hemopexin isoform X1 GN=HPX [Sus scrofa]	21	21	139560000000	5956400000	3997100000	4266200000	9005100000	7928700000	4496100000	4037800000	9042000000	3358200000	5624700000	2178400000	6166100000	5728200000	11795000000	3763100000	5811500000	5570700000	6041300000	6498600000	3632800000	4774200000	4032400000	5523800000	3371600000	4097300000	2866200000	8378700000	5800300000	5125600000	10451000000	9868700000	5103700000	5140400000	12712000000	8296100000	8727400000	5650300000	8087200000	14624000000	18747000000	3616300000	7853600000	8069100000
COL1A1	XP_020922814.1;XP_020922813.1;XP_020922812.1;CON__Q862S4	XP_020922814.1;XP_020922813.1;XP_020922812.1	XP_020922814.1 collagen alpha-1(I) chain isoform X3 GN=COL1A1 [Sus scrofa];XP_020922813.1 collagen alpha-1(I) chain isoform X2 GN=COL1A1 [Sus scrofa];XP_020922812.1 collagen alpha-1(I) chain isoform X1 GN=COL1A1 [Sus scrofa]	18	18	138010000000	4719300000	3091300000	5778100000	9632000000	9646300000	3978900000	7729900000	2002800000	1158400000	1326800000	1837600000	5715400000	2870800000	5716600000	4487300000	15093000000	1956100000	21033000000	6242500000	2967700000	4003500000	1390400000	8691400000	2016700000	2498900000	2424300000	5953400000	4012900000	6733400000	11589000000	11332000000	4058400000	7457300000	3596700000	4001600000	2191100000	6852300000	6835600000	8393900000	7762200000	4810900000	21044000000	3302800000
TPM2	XP_005660265.1;CON__Q3SX28	XP_005660265.1;CON__Q3SX28	XP_005660265.1 tropomyosin beta chain isoform X3 GN=TPM2 [Sus scrofa];	0	18	133570000000	6999300000	4910900000	6671600000	6760100000	6998200000	7679700000	6869400000	6195000000	3039600000	3597200000	1878700000	4009900000	1654900000	4061300000	10593000000	5628300000	4025100000	5571600000	4448200000	2368900000	6558700000	5581500000	6660800000	3633400000	2808000000	4366500000	6146300000	4751900000	5648200000	6411200000	7704700000	6000400000	5165600000	7363400000	7904200000	4980500000	5857700000	4763900000	3922700000	4450900000	8309300000	7539400000	5113100000
ATP5F1A	NP_001172071.1	NP_001172071.1	NP_001172071.1 ATP synthase subunit alpha, mitochondrial GN=ATP5F1A [Sus scrofa]	28	28	133170000000	4967700000	5222000000	7512800000	4771700000	4775800000	7224100000	6579900000	4869200000	2570700000	4573000000	2525300000	5436700000	2601400000	4421600000	8407700000	4337000000	4118600000	5582500000	5153200000	3661900000	6575400000	5605600000	5900700000	5054500000	4732000000	5991600000	6251000000	6574600000	7637000000	6160000000	5922100000	7337500000	6957400000	6594300000	7843000000	7200000000	8299300000	6754200000	7323700000	6251800000	7279100000	6631300000	6285100000
COL6A2	XP_020938158.1	XP_020938158.1	XP_020938158.1 LOW QUALITY PROTEIN: collagen alpha-2(VI) chain GN=COL6A2 [Sus scrofa]	32	32	132940000000	3253500000	5484800000	5270000000	4483300000	9755700000	6712900000	8343500000	2637800000	1605400000	2359300000	2402100000	8676900000	2620700000	4292800000	6766900000	5775200000	4140800000	7683600000	6306300000	1676400000	8635900000	2306100000	8695100000	2102100000	3907000000	7041100000	3567400000	6514600000	5781600000	6004600000	11661000000	6214900000	8220200000	3714000000	4556200000	3702000000	8019200000	10390000000	7944500000	5652700000	6450400000	8629700000	6084700000
LOC733637	NP_001231180.1;NP_001038037.3	NP_001231180.1;NP_001038037.3	NP_001231180.1 myosin regulatory light chain 2 protein isoform 2 GN=LOC733637 [Sus scrofa];NP_001038037.3 myosin regulatory light chain 2 protein isoform 1 GN=LOC733637 [Sus scrofa]	1	16	132900000000	5301000000	5896500000	6326200000	4998700000	4893800000	7819800000	6362400000	5496400000	2756800000	4053600000	2280900000	4412800000	2213500000	3844200000	10326000000	5541300000	3915700000	6540700000	6170800000	4026000000	6458900000	5502600000	5059400000	4560300000	3626700000	4513400000	6037300000	6360300000	6567900000	6881200000	6156800000	7240900000	6226900000	7496300000	6597100000	6389900000	6461800000	6534700000	6265100000	6112400000	8549500000	8249400000	6119000000
FLNB	XP_020924726.1;XP_020924725.1;XP_020924724.1;XP_020924723.1;XP_020924721.1;XP_020924720.1;XP_020924722.1	XP_020924726.1;XP_020924725.1;XP_020924724.1;XP_020924723.1;XP_020924721.1;XP_020924720.1;XP_020924722.1	XP_020924726.1 filamin-B isoform X7 GN=FLNB [Sus scrofa];XP_020924725.1 filamin-B isoform X6 GN=FLNB [Sus scrofa];XP_020924724.1 filamin-B isoform X5 GN=FLNB [Sus scrofa];XP_020924723.1 filamin-B isoform X4 GN=FLNB [Sus scrofa];XP_020924721.1 filamin-B iso	128	131	132820000000	5489700000	4464200000	6091100000	5563400000	5139700000	7086800000	5930800000	5115600000	2411600000	3819700000	1813200000	4769600000	1891400000	4231100000	11112000000	5129200000	3989000000	6617600000	6974100000	3433100000	7232200000	5766200000	5536100000	4119900000	3202400000	5889800000	6266800000	5502700000	6613100000	6527700000	6040600000	6867000000	6093000000	7166500000	7339200000	6048100000	6597500000	5924000000	6573900000	5691100000	9228200000	7583200000	6048400000
SERPINH1	NP_001231061.1	NP_001231061.1	NP_001231061.1 serpin H1 precursor GN=SERPINH1 [Sus scrofa]	23	23	131430000000	3910300000	4423100000	7908300000	5545900000	3259000000	5629900000	4985600000	6130900000	2626600000	3680100000	1809000000	3391200000	2173400000	5899800000	12962000000	7717800000	2804400000	6721400000	4300800000	4033400000	6765600000	5845800000	6822200000	3124000000	4214000000	4743600000	4718100000	5692500000	8905100000	6810800000	4334400000	5706800000	5438500000	8324000000	7338600000	5646900000	6419200000	4171500000	6669700000	7941300000	11580000000	11041000000	4519800000
KRT19	XP_003131485.1;CON__P35900;XP_003131478.3;XP_003131482.3;CON__Q9UE12;NP_001231824.1;CON__Q15323;CON__Q14525;XP_005653958.1;CON__Q497I4;CON__Q6NTB9;CON__O76009;CON__O76011;XP_020921967.1;CON__Q9C075;CON__Q6IFU5;CON__Q8IUT8;XP_003358093.2	XP_003131485.1	XP_003131485.1 keratin, type I cytoskeletal 19 GN=KRT19 [Sus scrofa]	16	38	129950000000	3215400000	4502500000	6650700000	6716500000	4909700000	7015100000	7237100000	3029200000	1780400000	3425700000	2075700000	8338500000	1329600000	11513000000	10456000000	2030200000	5161400000	6135000000	3174800000	3361500000	4637000000	3580600000	3551100000	7815100000	3716500000	4589400000	3360200000	4995600000	6662400000	6909800000	5385200000	6387900000	7272400000	4192600000	4544600000	5092400000	6396700000	9854900000	4096300000	14734000000	8950500000	2816000000	6953900000
TPM3	NP_001001632.1;XP_005663430.1;XP_020944392.1;XP_020944393.1;XP_013852498.1;XP_005663433.1	NP_001001632.1;XP_005663430.1;XP_020944392.1;XP_020944393.1;XP_013852498.1;XP_005663433.1	NP_001001632.1 tropomyosin alpha-3 chain GN=TPM3 [Sus scrofa];XP_005663430.1 tropomyosin alpha-3 chain isoform X18 GN=TPM3 [Sus scrofa];XP_020944392.1 tropomyosin alpha-3 chain isoform X11 GN=TPM3 [Sus scrofa];XP_020944393.1 tropomyosin alpha-3 chain isofo	0	19	129650000000	6601700000	5540300000	7076900000	5680200000	5508300000	6289000000	6695300000	5130300000	2398500000	5069500000	2237300000	5967300000	2137800000	5031000000	6659900000	3938100000	4891600000	5040100000	5228800000	2198700000	5957900000	6452900000	4498200000	4378700000	3673900000	5364000000	5878200000	5898900000	6244700000	5841400000	5342900000	5558000000	5974400000	5240100000	5751500000	6408200000	5497400000	5984500000	4618300000	5139500000	4950100000	5691600000	6153400000
MYH14	XP_020950448.1;XP_020950442.1	XP_020950448.1;XP_020950442.1	XP_020950448.1 myosin-14 isoform X6 GN=MYH14 [Sus scrofa];XP_020950442.1 myosin-14 isoform X3 GN=MYH14 [Sus scrofa]	3	110	128300000000	6175100000	6061800000	7916800000	4949000000	5182200000	7626400000	6416800000	4846200000	2328100000	4393400000	1988500000	6166400000	1942100000	3906500000	7986100000	3594900000	4243600000	5032600000	4725100000	2866500000	6298400000	5743800000	4241100000	4563000000	2675900000	6426000000	6792000000	7126100000	7854200000	5782000000	6209500000	7174900000	6624400000	6268300000	6537900000	6877700000	6728800000	7505400000	6228100000	5182400000	6507300000	5073900000	6121700000
PRDX6	NP_999573.1	NP_999573.1	NP_999573.1 peroxiredoxin-6 GN=PRDX6 [Sus scrofa]	23	23	126650000000	5619900000	3930400000	6229600000	6572900000	5081300000	8240700000	7158000000	5084600000	2576400000	5099500000	2722700000	6341300000	1883000000	4588600000	5454800000	2885700000	3561800000	4125700000	5280100000	2894100000	5894300000	5540600000	3955400000	5101400000	3820000000	7010200000	6610500000	5160200000	7004200000	8354400000	6349700000	8137400000	7844800000	6930600000	7300000000	7524200000	9029500000	8009200000	6255000000	6652300000	4749800000	4275300000	5206100000
H2AC20	XP_013852658.1;XP_005663563.1;XP_003355263.3	XP_013852658.1;XP_005663563.1;XP_003355263.3	XP_013852658.1 histone H2A type 2-C GN=LOC106510170 [Sus scrofa];XP_005663563.1 histone H2A type 2-A-like GN=LOC102159655 [Sus scrofa];XP_003355263.3 histone H2A type 2-A-like GN=LOC100624086 [Sus scrofa]	1	3	126390000000	6334800000	6324100000	5802000000	4963600000	4039800000	7202100000	5412700000	6267800000	2361200000	3646900000	1716500000	3585500000	1910000000	4958300000	6461000000	5177200000	6793700000	6637700000	5251200000	2095100000	7219800000	4489400000	3959900000	3498300000	3208700000	7076700000	7302600000	10152000000	10483000000	10111000000	6242800000	5949300000	6693200000	8730500000	7147600000	5357700000	6416400000	3516000000	5932700000	4168400000	5487900000	6045200000	5772300000
PGK1	NP_001093402.1;NP_998947.1	NP_001093402.1	NP_001093402.1 phosphoglycerate kinase 1 GN=PGK1 [Sus scrofa]	29	29	126260000000	6139000000	5219300000	6440000000	5271600000	5332500000	7083000000	6237200000	4893000000	2576500000	4461100000	2293400000	5298000000	2500500000	4937700000	5713600000	4059100000	4305400000	5191800000	5964600000	2556700000	5582000000	5380800000	4931800000	4715100000	4139200000	5038600000	7421700000	6390200000	7270300000	6925800000	6825700000	7253000000	6847900000	6485200000	7262100000	6853600000	7257300000	6761600000	6958500000	6349200000	5675400000	6269800000	6392300000
LOC106504545	XP_020955331.1	XP_020955331.1	XP_020955331.1 LOW QUALITY PROTEIN: serpin A3-8 GN=LOC106504545 [Sus scrofa]	13	21	123590000000	3679000000	4911700000	6175000000	11130000000	7772000000	4182600000	4032900000	4793200000	2128000000	4487600000	2553200000	6183500000	5131800000	11530000000	2371400000	4540500000	4275600000	4017900000	7008400000	3326800000	2672100000	2891300000	3755700000	2023500000	4803800000	3209600000	3831300000	5924400000	6599800000	13495000000	9285000000	3622200000	4280300000	5510100000	5274200000	6272300000	7706200000	7394000000	14521000000	15957000000	2688400000	7048700000	5328900000
CAP1	XP_020951657.1;XP_020951656.1;XP_020951655.1;XP_003127872.5	XP_020951657.1;XP_020951656.1;XP_020951655.1;XP_003127872.5	XP_020951657.1 adenylyl cyclase-associated protein 1 isoform X1 GN=CAP1 [Sus scrofa];XP_020951656.1 adenylyl cyclase-associated protein 1 isoform X1 GN=CAP1 [Sus scrofa];XP_020951655.1 adenylyl cyclase-associated protein 1 isoform X1 GN=CAP1 [Sus scrofa];X	0	34	122680000000	7048800000	5994300000	5606200000	5548600000	4164200000	7619900000	7484100000	4802900000	2096600000	4685000000	1803900000	5085200000	1995000000	4084800000	7182200000	4077200000	4830500000	4940600000	6549800000	2536500000	4786200000	4699700000	4090300000	3661400000	3366800000	3941400000	7445000000	6787200000	6259300000	6403400000	5834000000	6710100000	6996400000	6621600000	5232500000	6760100000	5745000000	6081200000	5863900000	6200000000	6077600000	6120000000	6552000000
ALDOA	XP_020943663.1;XP_020943661.1;XP_020943660.1;XP_020943659.1;XP_020943658.1;XP_020943657.1;XP_020943656.1;XP_020943655.1;XP_020943654.1;XP_020922513.1	XP_020943663.1;XP_020943661.1;XP_020943660.1;XP_020943659.1;XP_020943658.1;XP_020943657.1;XP_020943656.1;XP_020943655.1;XP_020943654.1	XP_020943663.1 fructose-bisphosphate aldolase A isoform X4 GN=ALDOA [Sus scrofa];XP_020943661.1 fructose-bisphosphate aldolase A isoform X4 GN=ALDOA [Sus scrofa];XP_020943660.1 fructose-bisphosphate aldolase A isoform X4 GN=ALDOA [Sus scrofa];XP_020943659.	21	25	122170000000	6607800000	5188400000	6591100000	4808800000	5733400000	6625800000	5942500000	3792800000	2050300000	5972800000	1724100000	4684100000	1731500000	4880800000	5752900000	4594900000	4396500000	5193100000	6181000000	2369000000	4783200000	4962000000	4607500000	4277900000	3759000000	4959300000	7496200000	6452400000	6938900000	6331800000	6256800000	6998200000	6797700000	5908800000	5400500000	6632500000	5634600000	6293400000	5792400000	7504700000	5732400000	5880000000	6126700000
DYNC1H1	XP_020937243.1	XP_020937243.1	XP_020937243.1 LOW QUALITY PROTEIN: cytoplasmic dynein 1 heavy chain 1 GN=DYNC1H1 [Sus scrofa]	245	245	122110000000	5048800000	4648300000	6289800000	4794300000	4375700000	6738500000	6488900000	5060900000	2120900000	4060500000	1778300000	4533200000	1771600000	4163900000	9663100000	4319300000	3573900000	5243800000	5129300000	2747800000	6609200000	5614200000	5100100000	3293800000	3615600000	5331000000	5698300000	5699800000	6285700000	5770500000	5234800000	6002100000	6217700000	6804000000	6820100000	5995600000	6973100000	5550700000	6166300000	5789600000	7690500000	6531800000	5467000000
LGALS1	NP_001001867.1	NP_001001867.1	NP_001001867.1 galectin-1 GN=LGALS1 [Sus scrofa]	8	8	118410000000	4141000000	3629100000	4854100000	5638400000	5983100000	6104400000	6442600000	5108400000	2783700000	3476300000	2021700000	3572300000	2076700000	4695300000	8799400000	3830500000	3543900000	6403100000	5162000000	3039100000	6513300000	4466800000	5752300000	3780800000	2888200000	3700300000	4945700000	4939400000	4905300000	7444900000	7066100000	6194900000	7196200000	6596600000	6916100000	5520100000	6314700000	4662400000	6248600000	6295900000	7440400000	5505200000	5359900000
-	CON__Q3SX09	CON__Q3SX09		1	3	117770000000	4063800000	4035200000	4150600000	4412700000	4370000000	4619200000	5957900000	7014500000	2469900000	5475500000	2722900000	5867900000	7116400000	7315900000	2003100000	2858000000	3765700000	2955800000	2948800000	9955600000	5002000000	4465600000	2565400000	3578800000	3796200000	4283600000	3930200000	4484900000	3582100000	4932500000	5175400000	3683400000	5599400000	5799100000	5492900000	6335300000	8226000000	6553600000	15595000000	7980500000	1506900000	2858900000	6070800000
PEBP1	XP_003132938.1;XP_020928716.1	XP_003132938.1;XP_020928716.1	XP_003132938.1 phosphatidylethanolamine-binding protein 1 isoform X1 GN=PEBP1 [Sus scrofa];XP_020928716.1 phosphatidylethanolamine-binding protein 1 isoform X2 GN=PEBP1 [Sus scrofa]	16	16	112630000000	5118800000	4103100000	5345300000	5092500000	5378000000	6916700000	5901500000	3809600000	2090900000	3232800000	1892300000	4263100000	1939700000	4836600000	7026200000	4051500000	3740600000	5120600000	4690500000	2465400000	5073300000	4542700000	4559500000	4264600000	2684700000	4488800000	6158600000	5240900000	5440100000	6682400000	5989500000	6999100000	6387800000	5424500000	6045500000	5055500000	6249600000	5512300000	5566700000	6698200000	6564400000	5872400000	5734200000
TUBB	NP_001038077.1	NP_001038077.1	NP_001038077.1 tubulin beta chain GN=TUBB [Sus scrofa]	5	6	110290000000	4260500000	4675700000	6480500000	4920800000	3560500000	6430700000	5621700000	4369000000	2418200000	3647400000	1778300000	3453800000	1950800000	4190300000	9093900000	4475900000	3225200000	5048700000	4291300000	2397600000	5540700000	4371500000	4331200000	2930000000	2517400000	4308700000	4612000000	6037400000	6300300000	6155200000	4729700000	5739400000	5811200000	6110900000	5990100000	6045200000	5709500000	4315100000	5538000000	5628800000	7461700000	6546500000	4996400000
HNRNPK	XP_020919685.1;XP_020919684.1;XP_020919683.1;XP_020919690.1;XP_020919689.1;XP_020919688.1;XP_020919687.1;XP_020919686.1	XP_020919685.1;XP_020919684.1;XP_020919683.1;XP_020919690.1;XP_020919689.1;XP_020919688.1;XP_020919687.1;XP_020919686.1	XP_020919685.1 heterogeneous nuclear ribonucleoprotein K isoform X3 GN=HNRNPK [Sus scrofa];XP_020919684.1 heterogeneous nuclear ribonucleoprotein K isoform X3 GN=HNRNPK [Sus scrofa];XP_020919683.1 heterogeneous nuclear ribonucleoprotein K isoform X3 GN=HNR	2	31	109070000000	4652800000	4395500000	5699800000	4793700000	3895000000	5936100000	5216800000	4921600000	2219800000	3538000000	1925400000	4332000000	1915500000	4280500000	7243600000	3192400000	3666000000	4799800000	4728800000	2549000000	5344900000	4237600000	3997500000	3538500000	3186900000	4858600000	5415100000	5401500000	6396700000	5624300000	4697900000	5949800000	5586800000	5778400000	4859400000	5107200000	4387900000	5014800000	4645100000	5235500000	6897100000	5050000000	5257900000
CALD1	XP_020934828.1;XP_020934827.1;XP_020934826.1;XP_020934825.1;XP_005673203.1;XP_005673202.1	XP_020934828.1;XP_020934827.1;XP_020934826.1;XP_020934825.1;XP_005673203.1;XP_005673202.1	XP_020934828.1 caldesmon isoform X6 GN=CALD1 [Sus scrofa];XP_020934827.1 caldesmon isoform X5 GN=CALD1 [Sus scrofa];XP_020934826.1 caldesmon isoform X5 GN=CALD1 [Sus scrofa];XP_020934825.1 caldesmon isoform X5 GN=CALD1 [Sus scrofa];XP_005673203.1 caldesmon	0	27	108950000000	5137900000	3534300000	5193100000	4693700000	5364000000	6579100000	5030300000	4441500000	2099500000	2974100000	1658400000	3732700000	1563900000	3279000000	8262200000	4636300000	3474400000	5030600000	4932100000	1588900000	5323100000	4542300000	4679800000	3994900000	2830200000	4371200000	6008900000	4526900000	5305200000	5600000000	6216800000	6367300000	5353200000	5959700000	6046600000	4232000000	5139200000	4802400000	5008000000	4353300000	7001600000	6858700000	5267500000
LOC100739163	XP_020938403.1	XP_020938403.1	XP_020938403.1 glutathione S-transferase P-like isoform X3 GN=LOC100739163 [Sus scrofa]	2	15	108580000000	5258800000	5159100000	5735900000	5042500000	4103900000	7174300000	5292300000	3523200000	2122900000	4449400000	2096100000	4531100000	1901800000	3739800000	5872200000	2934700000	3044900000	4107900000	5212600000	1751600000	4926600000	4756900000	3898600000	4391200000	3547700000	4001900000	5906700000	6464000000	6054200000	6273900000	5303100000	7156500000	5791700000	4952500000	5353600000	6705200000	6687100000	5880900000	5788200000	5186100000	5529000000	5120600000	4815700000
TPI1	NP_001032228.1	NP_001032228.1	NP_001032228.1 triosephosphate isomerase GN=TPI1 [Sus scrofa]	15	15	106970000000	4285600000	4637700000	5124600000	4082700000	4404000000	6123900000	5631700000	3415700000	2159700000	3381100000	1673600000	4588900000	1797100000	4029900000	6324600000	3265600000	3842400000	5268600000	5198000000	2324600000	4735000000	5143900000	3988400000	4697300000	2857000000	3985100000	4572100000	5082400000	5735700000	4866100000	5065400000	6019300000	5623800000	4490900000	6458500000	5100100000	5605500000	5560000000	5608800000	5243400000	5188200000	4424300000	5416500000
YWHAB	XP_005673018.1	XP_005673018.1	XP_005673018.1 14-3-3 protein beta/alpha GN=YWHAB [Sus scrofa]	12	14	105930000000	6169100000	4437400000	6108200000	5574800000	5211300000	6674500000	5855700000	3332100000	1608700000	2796800000	1197600000	4487100000	1421700000	3364800000	7052600000	3948400000	4294500000	4941400000	6219900000	1543400000	4524300000	3367900000	3697400000	2471300000	1939700000	3684600000	6199700000	5296800000	5625600000	5754300000	5146300000	5856100000	5611500000	4546100000	4821500000	5363400000	4598100000	5336600000	4728300000	4677600000	5507800000	5224200000	5926700000
PZP	XP_020948034.1	XP_020948034.1	XP_020948034.1 LOW QUALITY PROTEIN: pregnancy zone protein GN=PZP [Sus scrofa]	69	72	105470000000	3920700000	2364500000	2982700000	7575900000	6022800000	2366800000	2742000000	5978600000	2151000000	6085700000	1396900000	6054600000	7520200000	16322000000	1435900000	3715000000	3523300000	2038500000	4305400000	3170000000	2194600000	2575600000	2283400000	1421600000	3544000000	1782800000	4641700000	2995800000	3425400000	9219600000	7077900000	2796500000	3197700000	7894600000	5793800000	8406300000	4334900000	7128900000	20198000000	20090000000	1673200000	5106800000	5052200000
CSRP1	XP_003357724.1	XP_003357724.1	XP_003357724.1 cysteine and glycine-rich protein 1 GN=CSRP1 [Sus scrofa]	11	11	104580000000	5512900000	5089000000	2799500000	6336800000	5095700000	6178500000	5077700000	4651600000	1727700000	2908000000	1144000000	4291200000	1361200000	4284900000	5871600000	3015300000	3563600000	4345800000	5598400000	1669600000	4836900000	5095300000	3971700000	3229200000	2027700000	4897600000	6929600000	6008000000	2321900000	8219000000	6341700000	6158500000	5172300000	6539400000	5120100000	4669800000	4460400000	5492400000	4443700000	4983600000	6348800000	4400500000	5642600000
MACF1	XP_020951642.1	XP_020951642.1	XP_020951642.1 LOW QUALITY PROTEIN: microtubule-actin cross-linking factor 1 GN=MACF1 [Sus scrofa]	259	261	104210000000	3699900000	4860800000	4389600000	5123600000	2455800000	5502200000	4731500000	3490300000	2126100000	3986900000	2320800000	3004800000	2034500000	2912100000	9701600000	3829200000	3764100000	4601200000	3416000000	2564700000	6132100000	4946600000	4349800000	2831600000	2289000000	5141700000	4695100000	5056800000	5323200000	5376500000	3953400000	5367100000	5154400000	5333100000	5797800000	5311900000	6880300000	4502500000	5689000000	5081500000	8221900000	5623800000	4558200000
-	CON__Q3SX14	CON__Q3SX14		23	23	103970000000	4886600000	5035300000	6123000000	4802600000	4815600000	7437700000	5693400000	3387300000	1695700000	2986700000	1737600000	3982100000	1959200000	4045400000	6537300000	3804400000	3560300000	4911200000	3649500000	2350000000	4207300000	3548200000	4089400000	3028200000	1750000000	3941800000	5061900000	6022500000	6605600000	6333100000	5679000000	7022200000	5738300000	4630700000	4636200000	4437900000	4438500000	5044100000	5309100000	5462000000	5918900000	5255500000	4756000000
CAT	NP_999466.2;XP_020937157.1	NP_999466.2;XP_020937157.1	NP_999466.2 catalase GN=CAT [Sus scrofa];XP_020937157.1 catalase isoform X1 GN=CAT [Sus scrofa]	30	30	103620000000	5793700000	3380300000	5277500000	4203000000	5186400000	6012500000	4573400000	4036300000	1819600000	3422300000	1671100000	4849700000	1850400000	4297800000	5714900000	3470100000	3896100000	3969200000	4345000000	3328600000	4421300000	4075300000	2990600000	3620700000	3566100000	3846400000	6041100000	4075100000	5591400000	4993900000	5982800000	5705000000	4662600000	5108600000	4732800000	4683000000	4838700000	5965200000	5562100000	5578100000	5006700000	5075400000	5551800000
P4HB	XP_020922086.1	XP_020922086.1	XP_020922086.1 protein disulfide-isomerase GN=P4HB [Sus scrofa]	31	31	102950000000	4268200000	4349500000	5826000000	4402600000	3789000000	5365500000	4468700000	4261400000	1977800000	3259800000	1540500000	4016100000	1593700000	3525200000	6342300000	4377500000	3431900000	4858700000	4486700000	2549800000	4073000000	4922400000	4202800000	3606300000	3079900000	4374300000	4999900000	5403400000	6083400000	5268000000	4596400000	5401500000	4597000000	5265000000	5762300000	4777500000	5490100000	5035300000	4707100000	4659200000	5897700000	6664700000	5131500000
FHL1	NP_999540.1;XP_020935182.1;XP_020935183.1;XP_020935184.1;XP_020935185.1;XP_020935181.1;XP_020935180.1;XP_013846457.1;XP_005657972.1;XP_020935179.1;XP_020935178.1;XP_013846455.1;XP_005657973.1;XP_005657971.1;XP_013846458.1;XP_020935187.1;XP_020935188.1	NP_999540.1;XP_020935182.1;XP_020935183.1;XP_020935184.1;XP_020935185.1;XP_020935181.1;XP_020935180.1;XP_013846457.1;XP_005657972.1;XP_020935179.1;XP_020935178.1;XP_013846455.1;XP_005657973.1;XP_005657971.1;XP_013846458.1;XP_020935187.1;XP_020935188.1	NP_999540.1 four and a half LIM domains protein 1 GN=FHL1 [Sus scrofa];XP_020935182.1 four and a half LIM domains protein 1 isoform X5 GN=FHL1 [Sus scrofa];XP_020935183.1 four and a half LIM domains protein 1 isoform X5 GN=FHL1 [Sus scrofa];XP_020935184.1	17	17	102200000000	4485700000	6271400000	991880000	7685200000	5171000000	6508100000	6073000000	3732100000	1734900000	2988800000	1196600000	3644000000	1416200000	4135400000	6989200000	2550600000	4022500000	4818900000	6125000000	1453200000	4361900000	3845900000	4003200000	3352500000	1423900000	3219500000	5279500000	7902900000	973220000	9781900000	6362600000	6644600000	6185300000	4913700000	4827300000	4315500000	3610900000	4861900000	4487100000	5550000000	6503500000	3860000000	6217500000
CALR	NP_001167604.1	NP_001167604.1	NP_001167604.1 calreticulin precursor GN=CALR [Sus scrofa]	21	21	98983000000	4486100000	4248700000	4828500000	3500800000	3286900000	5234600000	4801200000	4622500000	2060800000	4263400000	1721700000	3635000000	1084800000	3639600000	5643000000	3088500000	3064000000	4093600000	4940300000	2250200000	4847700000	5043700000	3849000000	3209900000	3293200000	4245700000	5276000000	5209300000	5650000000	4538400000	4239000000	5101000000	5068900000	5199700000	4954900000	5283400000	4119000000	4347700000	3705800000	4889100000	5739500000	5046700000	4797800000
CNN1	NP_999043.1;XP_020936224.1;XP_013842817.1	NP_999043.1;XP_020936224.1;XP_013842817.1	NP_999043.1 calponin-1 GN=CNN1 [Sus scrofa];XP_020936224.1 calponin-1 isoform X1 GN=CNN1 [Sus scrofa];XP_013842817.1 calponin-1 isoform X1 GN=CNN1 [Sus scrofa]	21	21	96837000000	4570400000	3437800000	4249700000	4441100000	6343600000	6069100000	4482400000	5046900000	2335700000	2449500000	1631600000	3817900000	1037500000	3491700000	7322400000	3458900000	2681900000	3290900000	2952400000	1867000000	5826300000	3409100000	5005700000	2733700000	1971300000	2912500000	5201600000	4356700000	4211600000	5526700000	7385600000	5713800000	4410700000	6958500000	6584800000	3808800000	5035800000	4711200000	3583700000	5176300000	6569200000	5662800000	3868700000
LMNB1	XP_003123930.2	XP_003123930.2	XP_003123930.2 lamin-B1 GN=LMNB1 [Sus scrofa]	44	47	96037000000	4355700000	3825300000	5236400000	4393600000	3839100000	6477500000	5504100000	3255700000	1469700000	2847100000	1321300000	3496900000	1257100000	3595100000	6022500000	3541200000	3996000000	5195400000	4626900000	1434000000	3666500000	3318300000	3702800000	3877000000	2468000000	3313600000	4624200000	4231300000	5421800000	4896800000	4576400000	5343200000	5140300000	4340200000	3899200000	4185400000	4034400000	4201300000	3961700000	4834500000	5009900000	4788100000	5446500000
HSP70.2	NP_998931.1	NP_998931.1	NP_998931.1 heat shock 70 kDa protein 1B GN=HSP70.2 [Sus scrofa]	17	27	95124000000	4589400000	4226000000	4909300000	3904200000	5246100000	5465200000	4136600000	3111800000	1562000000	2352400000	1465400000	3737800000	1279900000	2796600000	4805800000	3273700000	3304700000	5616300000	5518600000	1622500000	3692400000	3896800000	4364900000	4864500000	2570600000	2810700000	5290600000	5167800000	5270800000	4820000000	6662000000	5291600000	4381300000	4428200000	4715300000	3816500000	4427900000	5023400000	3818900000	4059800000	4383300000	4791100000	5063500000
OGN	XP_020941477.1;XP_013851234.1;NP_001302657.1	XP_020941477.1;XP_013851234.1;NP_001302657.1	XP_020941477.1 mimecan isoform X1 GN=OGN [Sus scrofa];XP_013851234.1 mimecan isoform X1 GN=OGN [Sus scrofa];NP_001302657.1 mimecan precursor GN=OGN [Sus scrofa]	17	17	94006000000	4992300000	2487700000	5334500000	7494100000	5977500000	5087100000	5663900000	2901800000	958180000	2550300000	922630000	2697700000	1331800000	6708100000	1870300000	5839300000	1922300000	8158000000	5132600000	1575300000	3008600000	1215900000	4511200000	3317000000	1672400000	675190000	5699500000	2994600000	5753600000	9317100000	6932700000	4604600000	5818800000	3986500000	3075500000	3713700000	4504500000	3312400000	4174200000	9465900000	1845700000	8230800000	2968200000
ACTB	XP_020941706.1;XP_003124328.1	XP_020941706.1;XP_003124328.1	XP_020941706.1 actin, cytoplasmic 1 GN=ACTB [Sus scrofa];XP_003124328.1 actin, cytoplasmic 1 GN=ACTB [Sus scrofa]	2	2	93886000000	4518300000	3678400000	2565300000	3844500000	3524200000	4428300000	4394100000	3895700000	3325100000	4351200000	1977100000	3696200000	2681900000	2872200000	4674200000	2443300000	3563600000	3753100000	4527500000	2429700000	4517300000	4020100000	3972900000	3154000000	2697400000	4380600000	0	0	0	0	0	0	0	0	0	0	0	0	0	0	0	0	0
FASN	NP_001093400.1	NP_001093400.1	NP_001093400.1 fatty acid synthase GN=FASN [Sus scrofa]	116	116	91183000000	4871100000	4285000000	5145000000	5116200000	3551900000	4322800000	4258000000	3389300000	1435000000	2343100000	1047600000	3573000000	1265700000	2682100000	5650300000	4974500000	2568100000	4067700000	3087200000	2547200000	5309400000	4121100000	2992700000	2835100000	1594300000	4149900000	5014100000	4902900000	5080400000	5772200000	4174900000	4016600000	4127800000	4622900000	4839000000	3698500000	4265700000	4390000000	4376800000	3669400000	4632700000	6184300000	3743700000
PARK7	NP_001072131.1	NP_001072131.1	NP_001072131.1 protein DJ-1 GN=PARK7 [Sus scrofa]	18	18	89962000000	4678900000	3731300000	4280900000	4146100000	4390100000	5240200000	4985600000	3154200000	1658000000	2757300000	1237300000	4062600000	1155100000	3845400000	4968800000	2986900000	2959700000	4303600000	4071200000	1552200000	4258900000	3199400000	3496000000	3112900000	2311700000	3418000000	5521400000	4733600000	4688700000	5267200000	5194800000	4864300000	4987100000	4639800000	4361900000	4402900000	3726900000	4874100000	3790900000	5205200000	4716100000	3969300000	4613200000
ARHGDIA	XP_020921798.1;XP_020921797.1;NP_001188313.1;XP_020921795.1	XP_020921798.1;XP_020921797.1;NP_001188313.1;XP_020921795.1	XP_020921798.1 rho GDP-dissociation inhibitor 1 isoform X2 GN=ARHGDIA [Sus scrofa];XP_020921797.1 rho GDP-dissociation inhibitor 1 isoform X2 GN=ARHGDIA [Sus scrofa];NP_001188313.1 rho GDP-dissociation inhibitor 1 GN=ARHGDIA [Sus scrofa];XP_020921795.1 rho	13	13	89869000000	4982700000	3818400000	4732700000	4041900000	3361100000	5754700000	5472700000	3372800000	1790900000	3703300000	1517300000	3894500000	1481900000	3680500000	4596900000	2391700000	2976300000	3130200000	3598700000	1538800000	4070200000	4061000000	2663700000	2654000000	2206300000	4375700000	5728800000	4911400000	5050600000	5241100000	4719000000	5739200000	5852600000	4426400000	5085600000	5531400000	5554400000	4760100000	4329400000	5002000000	4173700000	3656700000	4578100000
TNS1	XP_020930866.1	XP_020930866.1	XP_020930866.1 LOW QUALITY PROTEIN: tensin-1 GN=TNS1 [Sus scrofa]	71	74	86957000000	4574500000	3171000000	3683500000	3856500000	4482000000	5338400000	4238500000	2943400000	1302200000	2577100000	1270400000	3280200000	964080000	1966800000	5445300000	3075900000	2848800000	4569400000	4962800000	1549200000	4105800000	3531800000	3750600000	3855400000	1955300000	3658700000	5041500000	4031700000	4022100000	4757600000	5298300000	5024200000	4255400000	4103600000	4300900000	3990100000	4535600000	4127600000	3594200000	3140700000	4751800000	4485100000	4348600000
VCP	NP_999445.1	NP_999445.1	NP_999445.1 transitional endoplasmic reticulum ATPase GN=VCP [Sus scrofa]	3	56	84586000000	4187600000	3312200000	4157700000	3397700000	3020500000	4954400000	4487100000	3453900000	1586400000	2756900000	1120700000	3467200000	1433000000	3143000000	5468800000	2880000000	2704800000	3437900000	3548300000	2095800000	4122500000	4016000000	3276700000	2916700000	2420600000	3219400000	4672900000	4080500000	4327600000	4195600000	3876400000	4631900000	4564500000	4484500000	4719400000	4113000000	4152300000	4232500000	4221900000	4626600000	5116200000	4422000000	4064900000
PRDX2	NP_001231403.1	NP_001231403.1	NP_001231403.1 peroxiredoxin-2 GN=PRDX2 [Sus scrofa]	12	12	84357000000	3918100000	3315400000	2947200000	3201000000	4060000000	4139900000	4596000000	3421300000	1865200000	3364500000	1643800000	3396000000	2076800000	3853100000	3122600000	2489400000	3611400000	2903300000	3736400000	3162300000	3327600000	3138400000	2441400000	2699200000	3965100000	3961600000	4630900000	4043300000	3659700000	4044900000	4736800000	4244100000	5168600000	4867600000	5477300000	5059600000	5212200000	4424500000	6059500000	5976900000	3049600000	4093900000	5279800000
-	CON__P02768-1	CON__P02768-1		6	6	84259000000	2666800000	1883500000	5379600000	5839700000	5045600000	4131700000	3784200000	2841700000	892360000	2456500000	1115500000	3161100000	4617500000	8401600000	3588100000	2340800000	2896000000	3165800000	2432700000	3456300000	2510000000	1550200000	2631000000	1409100000	1645600000	4415900000	0	0	0	0	0	0	0	3988900000	3900200000	3844900000	6466600000	3350900000	14259000000	5338900000	0	0	0
COL14A1	XP_020946209.1;XP_005662937.1	XP_020946209.1;XP_005662937.1	XP_020946209.1 collagen alpha-1(XIV) chain isoform X4 GN=COL14A1 [Sus scrofa];XP_005662937.1 collagen alpha-1(XIV) chain isoform X2 GN=COL14A1 [Sus scrofa]	1	72	84028000000	3242200000	927770000	5680300000	8648600000	3870200000	2221200000	4701200000	2481100000	966310000	2026400000	687800000	1462200000	1909800000	7288500000	2225000000	7163000000	1071700000	7696200000	7119800000	2073200000	2411600000	963790000	3130900000	1714900000	1519200000	824990000	3823700000	1497400000	5750500000	9763600000	4616900000	2538700000	4669700000	3371200000	3158400000	3185200000	2700400000	2233100000	5683400000	8984500000	2287700000	9915900000	1962000000
LDHA	XP_020937318.1;XP_020937314.1;XP_020937310.1;XP_013849955.2;NP_001165834.1;XP_020933349.1;XP_020933342.1;XP_020933337.1;NP_001182704.1	XP_020937318.1;XP_020937314.1;XP_020937310.1;XP_013849955.2;NP_001165834.1	XP_020937318.1 L-lactate dehydrogenase A chain isoform X3 GN=LDHA [Sus scrofa];XP_020937314.1 L-lactate dehydrogenase A chain isoform X3 GN=LDHA [Sus scrofa];XP_020937310.1 L-lactate dehydrogenase A chain isoform X2 GN=LDHA [Sus scrofa];XP_013849955.2 L-la	25	26	82509000000	4730000000	4092700000	4441100000	3179500000	2916000000	4476400000	3479700000	2799900000	1263500000	2756800000	1056600000	2762200000	1226300000	3410600000	5543700000	2529000000	2743700000	3440700000	5123700000	1479300000	3662300000	3251400000	2855900000	3678200000	2320300000	3289200000	5091200000	5312400000	4999400000	3634100000	3650900000	4660600000	3729200000	3779800000	3116600000	4115000000	2936100000	3687400000	3237200000	4398500000	3487600000	3575400000	4103200000
ANXA6	XP_005672670.3	XP_005672670.3	XP_005672670.3 LOW QUALITY PROTEIN: annexin A6 GN=ANXA6 [Sus scrofa]	52	52	82296000000	3253100000	3556800000	3586200000	2520600000	3229700000	3755800000	4098200000	3065600000	1913400000	3007900000	1653900000	3227300000	1450700000	2831300000	5915700000	2729400000	2647400000	3529300000	2880100000	1551400000	5347300000	4150300000	4194300000	1420700000	2536100000	4243500000	3750400000	4471000000	4228100000	3142800000	3733700000	3729200000	4359700000	3967700000	5034000000	4371700000	5695300000	4002300000	4634200000	3771400000	5093300000	4086300000	3968900000
RBMS3	XP_020925631.1;XP_020925630.1;XP_020925629.1	XP_020925631.1;XP_020925630.1;XP_020925629.1	XP_020925631.1 RNA-binding motif, single-stranded-interacting protein 3 isoform X3 GN=RBMS3 [Sus scrofa];XP_020925630.1 RNA-binding motif, single-stranded-interacting protein 3 isoform X2 GN=RBMS3 [Sus scrofa];XP_020925629.1 RNA-binding motif, single-stran	4	5	80557000000	4563700000	39886000	4489200000	4257100000	2198700000	3645300000	4724500000	3370700000	2156500000	2380600000	2563100000	4306100000	3803800000	5134500000	2949000000	2939200000	12766000	2645600000	4021100000	4845400000	2635800000	1934300000	1624000000	1713300000	3801500000	3801300000	3870500000	4016600000	3349000000	5183800000	3673100000	4550100000	4894300000	0	5805300000	3857700000	6237300000	5315000000	7900600000	4121700000	5239400000	5036100000	0
MYO1C	XP_020923218.1;XP_020923212.1;XP_020923219.1;XP_020923213.1	XP_020923218.1;XP_020923212.1;XP_020923219.1;XP_020923213.1	XP_020923218.1 unconventional myosin-Ic isoform X4 GN=MYO1C [Sus scrofa];XP_020923212.1 unconventional myosin-Ic isoform X1 GN=MYO1C [Sus scrofa];XP_020923219.1 unconventional myosin-Ic isoform X5 GN=MYO1C [Sus scrofa];XP_020923213.1 unconventional myosin-	3	72	80408000000	3587600000	3251700000	3852200000	3332500000	3946400000	4706200000	4426200000	2958900000	1594000000	3111800000	1304100000	3811500000	1189100000	2436100000	3710700000	2465300000	2669900000	3312300000	3639200000	1475600000	4243700000	3841400000	3144600000	2869400000	1990900000	3537000000	4053000000	3907100000	4088000000	4036500000	4219100000	4500600000	4601600000	4022200000	4790900000	4676700000	5304000000	4501400000	4096000000	3584600000	3245900000	3466500000	3999800000
LUM	NP_001230268.1;CON__Q05443	NP_001230268.1	NP_001230268.1 lumican precursor GN=LUM [Sus scrofa]	13	13	80115000000	3752600000	1559400000	5087400000	5786300000	4603800000	3148700000	3941700000	2342800000	1096700000	1919800000	814450000	1799800000	1520600000	6235000000	1727700000	5886900000	1869200000	7836400000	5350700000	1162400000	1746200000	1270300000	4068200000	3193500000	1337000000	1057000000	4274400000	1965100000	6032900000	7160000000	5766100000	3109200000	4262000000	3318900000	3137900000	2950300000	2811000000	2274900000	4594500000	8256000000	1627400000	8737700000	2997800000
AGER	XP_013833109.1;NP_001116690.1;XP_013833110.1	XP_013833109.1;NP_001116690.1;XP_013833110.1	XP_013833109.1 advanced glycosylation end product-specific receptor isoform X1 GN=AGER [Sus scrofa];NP_001116690.1 advanced glycosylation end product-specific receptor precursor GN=AGER [Sus scrofa];XP_013833110.1 advanced glycosylation end product-specifi	12	12	80018000000	2595300000	3829800000	3635500000	2867200000	4586100000	4863400000	5565500000	2586700000	1527500000	3048900000	1838300000	4018400000	1396300000	2482500000	3886400000	2114800000	2618500000	3000100000	2760100000	1083700000	4542500000	3438200000	3356300000	2190400000	1917700000	4268400000	2917700000	4886200000	3956500000	3571300000	5276500000	4811100000	5607800000	3174900000	3583400000	3973000000	5448800000	5351800000	3396800000	3342200000	3655700000	3096800000	3804500000
TNC	XP_020938789.1;XP_020938779.1;XP_020938766.1;XP_020938755.1;XP_020938818.1;XP_020938841.1	XP_020938789.1;XP_020938779.1;XP_020938766.1;XP_020938755.1;XP_020938818.1;XP_020938841.1	XP_020938789.1 tenascin isoform X5 GN=TNC [Sus scrofa];XP_020938779.1 tenascin isoform X4 GN=TNC [Sus scrofa];XP_020938766.1 tenascin isoform X2 GN=TNC [Sus scrofa];XP_020938755.1 tenascin isoform X1 GN=TNC [Sus scrofa];XP_020938818.1 tenascin isoform X10	0	91	78090000000	2375100000	3277400000	4391500000	3333900000	1930400000	5820100000	4333000000	5668700000	2287700000	2928400000	1801900000	2138300000	1732700000	2239800000	11205000000	1097500000	1742600000	1203600000	866630000	1708000000	7169400000	2064800000	1745500000	610950000	1041800000	3375500000	2965000000	3959100000	4713200000	4191300000	2646200000	5087200000	4262300000	7184900000	5914100000	4376700000	5619700000	2908500000	5163200000	3184200000	9003000000	1992300000	2832400000
LDHB	XP_020947911.1;NP_001106758.1;XP_013843801.1	XP_020947911.1;NP_001106758.1;XP_013843801.1	XP_020947911.1 L-lactate dehydrogenase B chain isoform X2 GN=LDHB [Sus scrofa];NP_001106758.1 L-lactate dehydrogenase B chain GN=LDHB [Sus scrofa];XP_013843801.1 L-lactate dehydrogenase B chain isoform X1 GN=LDHB [Sus scrofa]	18	18	77881000000	3974400000	3351600000	4183200000	3326600000	3289000000	4150700000	3686800000	3085600000	1504900000	2978700000	1142000000	3078300000	1274700000	3145500000	3914800000	2579000000	2648900000	3900300000	3619600000	1419400000	3533900000	3452200000	2819100000	2710600000	2605500000	2505200000	4055400000	3850000000	4348200000	3742500000	4073000000	3739300000	3553400000	3946800000	4484100000	4043700000	4031800000	3755600000	3947200000	3842200000	3522000000	3451000000	3812600000
LAP3	XP_003356918.4	XP_003356918.4	XP_003356918.4 cytosol aminopeptidase isoform X2 GN=LAP3 [Sus scrofa]	2	33	76769000000	4135600000	2618600000	3761200000	2426800000	3642600000	4668400000	4039300000	2375100000	1416000000	3243700000	1289600000	3603400000	1277100000	1946500000	3500700000	2539800000	2725500000	3848500000	4402900000	1475100000	2469300000	2797400000	3435800000	3662600000	2519600000	2948500000	4854200000	3313300000	4180400000	3343700000	4313100000	4173600000	4286000000	3393500000	3881200000	4597100000	4033900000	4560400000	3619600000	2808900000	3451800000	3547000000	4082000000
CP	NP_001254623.2;XP_020924233.1;XP_013847041.1;CON__ENSEMBL:ENSBTAP00000031900	NP_001254623.2;XP_020924233.1;XP_013847041.1	NP_001254623.2 ceruloplasmin precursor GN=CP [Sus scrofa];XP_020924233.1 ceruloplasmin isoform X1 GN=CP [Sus scrofa];XP_013847041.1 ceruloplasmin isoform X1 GN=CP [Sus scrofa]	42	42	75100000000	3728300000	1890600000	3269000000	4343000000	4442900000	1636800000	1849100000	4445900000	1319600000	3995900000	703720000	4359000000	2691700000	7766500000	1423500000	3045100000	3205200000	2869500000	3906200000	1749100000	1782800000	2089400000	2683100000	1611800000	2660500000	1631300000	4097800000	2529500000	3526000000	4938100000	5518200000	1806700000	2011200000	6008900000	4100400000	6032400000	2642200000	5232100000	7946500000	10023000000	1296700000	4424100000	5159900000
TMSB10	NP_001090951.1;CON__P21752	NP_001090951.1;CON__P21752	NP_001090951.1 thymosin beta-10 GN=TMSB10 [Sus scrofa];	2	2	74993000000	3825600000	2747600000	4075100000	3481400000	2882200000	3774700000	3901900000	2955300000	1535700000	2834500000	1383600000	2677100000	1053200000	2837100000	4227100000	2617300000	2509000000	2711600000	3322900000	1502400000	3199400000	4250600000	2646700000	2311700000	2393500000	3335600000	0	0	3551500000	0	0	0	0	0	0	0	0	0	0	0	2398900000	7549400000	0
LPP	XP_020926910.1;XP_020926909.1;XP_020926908.1;XP_020926907.1;XP_020926906.1;XP_020926905.1	XP_020926910.1;XP_020926909.1;XP_020926908.1;XP_020926907.1;XP_020926906.1;XP_020926905.1	XP_020926910.1 lipoma-preferred partner GN=LPP [Sus scrofa];XP_020926909.1 lipoma-preferred partner GN=LPP [Sus scrofa];XP_020926908.1 lipoma-preferred partner GN=LPP [Sus scrofa];XP_020926907.1 lipoma-preferred partner GN=LPP [Sus scrofa];XP_020926906.1 l	43	43	74855000000	3816900000	2894500000	2668400000	3525000000	3785600000	4513400000	3888000000	3488900000	1508800000	2332200000	912480000	2535900000	795610000	1908000000	5325300000	2646800000	2256500000	3330100000	3764900000	1095300000	3754800000	3511700000	3279000000	2633400000	1603000000	3080100000	4025700000	3134800000	3146500000	3840600000	4158900000	4099900000	3521600000	3884900000	3167300000	2880200000	2872800000	2930800000	2456700000	2686000000	4555100000	3445800000	3057100000
ORM1	XP_005660429.1;XP_020923626.1;XP_005660428.1	XP_005660429.1;XP_020923626.1;XP_005660428.1	XP_005660429.1 alpha-1-acid glycoprotein isoform X2 GN=ORM1 [Sus scrofa];XP_020923626.1 alpha-1-acid glycoprotein isoform X3 GN=ORM1 [Sus scrofa];XP_005660428.1 alpha-1-acid glycoprotein isoform X1 GN=ORM1 [Sus scrofa]	13	13	74439000000	1285700000	2605700000	1455200000	3840400000	5431300000	2144000000	3744100000	1901500000	1354000000	1331200000	1307700000	4226900000	2481600000	8903700000	3189700000	4840800000	2674300000	2962300000	3206500000	950990000	3037600000	3386000000	2941700000	1496700000	2363800000	1375300000	1512100000	3229900000	1814900000	4907400000	6687000000	2061100000	3951300000	2598500000	3652700000	2013100000	4376800000	5347800000	7051200000	11575000000	2842200000	6992800000	4101400000
HNRNPM	XP_005654810.2;NP_001231859.1;XP_005654811.2;XP_020934397.1;XP_013842803.1;XP_020934422.1;XP_020934405.1;XP_020934430.1;XP_013842804.1;XP_013842805.1;XP_020934444.1;XP_020934452.1	XP_005654810.2;NP_001231859.1;XP_005654811.2;XP_020934397.1;XP_013842803.1;XP_020934422.1;XP_020934405.1;XP_020934430.1;XP_013842804.1;XP_013842805.1;XP_020934444.1;XP_020934452.1	XP_005654810.2 heterogeneous nuclear ribonucleoprotein M isoform X1 GN=HNRNPM [Sus scrofa];NP_001231859.1 heterogeneous nuclear ribonucleoprotein M GN=HNRNPM [Sus scrofa];XP_005654811.2 heterogeneous nuclear ribonucleoprotein M isoform X2 GN=HNRNPM [Sus sc	2	33	72408000000	3328200000	2970100000	4350200000	3177300000	2032000000	4488900000	3764600000	2734300000	1312100000	2256700000	1041800000	2728600000	981520000	2476300000	4954500000	2519200000	2476200000	3311800000	3416100000	1375400000	3235300000	3321500000	2682200000	2421500000	2185400000	2866500000	3424700000	3388500000	4419500000	3483400000	2839100000	3775900000	3471100000	3756100000	3899700000	3358500000	3972900000	3334700000	3256700000	3261300000	4228300000	3493500000	3527800000
IDH2	NP_001157479.1	NP_001157479.1	NP_001157479.1 isocitrate dehydrogenase , mitochondrial GN=IDH2 [Sus scrofa]	25	26	71828000000	2967800000	2902500000	3117500000	2603300000	2938600000	3574000000	3426000000	2565700000	1805000000	3120500000	1662100000	3308400000	1040000000	2363800000	3999100000	1939900000	2245600000	2581800000	2551000000	1402000000	4221600000	3949200000	2645500000	2776900000	2639500000	3480200000	3712000000	3809800000	3934700000	3606900000	3690800000	3548100000	3560400000	3295300000	4229700000	4007700000	4860900000	3792000000	3693700000	3152100000	3655700000	2942100000	3632200000
S100A12	NP_001153744.1	NP_001153744.1	NP_001153744.1 protein S100-A12 GN=S100A12 [Sus scrofa]	7	7	70803000000	4609300000	3751900000	2411300000	1846700000	2343600000	2198800000	1853200000	5052100000	2183100000	3972200000	1125300000	3515200000	1364400000	3354800000	898400000	2866800000	5574500000	2392400000	2501100000	739450000	2067800000	3890100000	2922700000	2457300000	3423600000	1487400000	5635800000	4651000000	2854900000	2269800000	2881400000	2345200000	2254400000	7185200000	3580500000	6018500000	2997100000	4482700000	3403400000	4746600000	935350000	4643900000	8377800000
FBN1	NP_001001771.1;XP_013850150.2	NP_001001771.1	NP_001001771.1 fibrillin-1 precursor GN=FBN1 [Sus scrofa]	83	86	70375000000	1875300000	1204800000	1361800000	2137600000	7374600000	3033200000	6624800000	472180000	371580000	819120000	1084500000	3948400000	1100800000	1646500000	3602800000	4216000000	1295100000	7239000000	3900000000	503000000	4002300000	1133500000	5826900000	991140000	2092100000	2518600000	2308300000	1645300000	1628300000	2889500000	8261200000	2821700000	6267600000	1039400000	1597700000	1563700000	3652100000	5028000000	3452000000	2492600000	3031100000	5640200000	2139200000
CRIP2	XP_020937308.1;XP_020937307.1	XP_020937308.1;XP_020937307.1	XP_020937308.1 cysteine-rich protein 2 isoform X2 GN=CRIP2 [Sus scrofa];XP_020937307.1 cysteine-rich protein 2 isoform X1 GN=CRIP2 [Sus scrofa]	14	14	70280000000	3295200000	3699400000	2635700000	3803700000	3480600000	4333200000	4281600000	2164000000	1476600000	2019900000	1120600000	2683200000	1048700000	2178500000	4558300000	1967100000	2524300000	3153400000	4385000000	995640000	3022500000	2745200000	2814600000	2445500000	1230000000	2217500000	4104900000	3909700000	3185500000	5260000000	3883300000	3966100000	4509800000	2798800000	2811000000	2737000000	2917500000	3950400000	2990700000	2828000000	3965500000	2555100000	3756100000
LOC100156325	XP_001928879.1;CON__Q9TTE1;CON__A2I7N0	XP_001928879.1	XP_001928879.1 serpin A3-6 GN=LOC100156325 [Sus scrofa]	7	18	69876000000	3942000000	2819200000	3176700000	2210600000	3761300000	830530000	463200000	5788000000	2277400000	2051600000	362450000	3201600000	854790000	2232500000	861390000	3518800000	4718500000	4798500000	4459300000	1042900000	792790000	2600000000	5065300000	2806200000	4401800000	838180000	6092600000	3291800000	2422100000	1742100000	4881600000	668640000	726220000	8472700000	5251500000	2748900000	1515900000	6016200000	2885600000	3595000000	627710000	4755200000	7600000000
UBA1	XP_020936016.1;XP_020936015.1;XP_020936014.1;XP_020936013.1;XP_013846320.2;XP_020936576.1	XP_020936016.1;XP_020936015.1;XP_020936014.1;XP_020936013.1;XP_013846320.2	XP_020936016.1 ubiquitin-like modifier-activating enzyme 1 GN=UBA1 [Sus scrofa];XP_020936015.1 ubiquitin-like modifier-activating enzyme 1 GN=UBA1 [Sus scrofa];XP_020936014.1 ubiquitin-like modifier-activating enzyme 1 GN=UBA1 [Sus scrofa];XP_020936013.1 u	49	49	69428000000	3301300000	2675400000	3732900000	3129100000	2922200000	3816500000	3543500000	2849800000	1233800000	2494100000	942780000	2999800000	1043600000	2719100000	3952600000	2219800000	2193800000	3181700000	3364100000	1314500000	3094400000	2813400000	2660200000	2521800000	2187000000	2520500000	3777000000	3355000000	3987300000	3710500000	3360100000	3615100000	3514600000	3670500000	3629600000	3681500000	3391000000	3569200000	3479400000	3707400000	3432300000	3306500000	3366700000
PGAM1	XP_003483583.1	XP_003483583.1	XP_003483583.1 phosphoglycerate mutase 1 GN=PGAM1 [Sus scrofa]	14	17	69425000000	3895400000	3443700000	3941700000	2828800000	2859100000	4485000000	3539500000	2074300000	1085700000	2299000000	931060000	2643000000	1035600000	1722600000	4059500000	2703000000	2756700000	3518700000	4089600000	1280300000	2691700000	2700200000	2339000000	2245900000	1696400000	2559900000	3740400000	3784200000	3984500000	3235700000	3593100000	3744000000	3579200000	2608000000	2681800000	2900000000	2793400000	3055300000	2862400000	2826300000	3191400000	3152300000	3539000000
TPM4	NP_999500.1;XP_020937225.1	NP_999500.1;XP_020937225.1	NP_999500.1 tropomyosin alpha-4 chain GN=TPM4 [Sus scrofa];XP_020937225.1 tropomyosin alpha-4 chain isoform X2 GN=TPM4 [Sus scrofa]	6	6	68736000000	2508400000	1900600000	2032400000	2573400000	2454000000	3173300000	2920300000	2173200000	2188600000	2306700000	1859400000	2638000000	1727800000	2167200000	4476300000	2381100000	2587600000	2978800000	2419100000	1871000000	3119400000	2950100000	3178100000	4246300000	2717600000	3187600000	2725700000	2205200000	2978200000	3752800000	2972500000	3504300000	3043500000	3254600000	4547400000	3446200000	4378600000	3332500000	4574300000	3032500000	4757500000	3800900000	3917700000
ACTR3	NP_001127815.1;XP_020934966.1;XP_020934965.1;XP_020934963.1;XP_020934961.1;XP_020934956.1	NP_001127815.1	NP_001127815.1 actin-related protein 3 GN=ACTR3 [Sus scrofa]	24	28	68209000000	4039300000	3385100000	2805200000	3129300000	3160300000	4039900000	3833000000	2526500000	1166400000	2777400000	1027500000	2849000000	1051700000	2365700000	3852100000	1969500000	2385900000	2774900000	3593900000	1310600000	3077200000	2612400000	2327800000	1973100000	1961700000	2213300000	4283300000	4003300000	3269600000	3613900000	3487100000	3778100000	3816000000	3467600000	3737400000	4226900000	3984700000	3426000000	3481000000	3304200000	3110400000	2783300000	3519300000
PLS3	XP_001925971.4	XP_001925971.4	XP_001925971.4 LOW QUALITY PROTEIN: plastin-3 GN=PLS3 [Sus scrofa]	32	34	68186000000	3013400000	3007500000	3019800000	2564100000	2313800000	3991500000	3450800000	2681600000	1182100000	2059600000	1091900000	2845600000	1171000000	1774200000	4979100000	2180100000	2659300000	2763300000	2938100000	1832000000	3788400000	3393400000	2430900000	2367900000	1711200000	2975100000	3415200000	3692700000	3416600000	3116300000	2920200000	4056000000	3669300000	3637000000	3604300000	3103000000	3696900000	3573200000	3314800000	2779700000	4748600000	3324600000	3696600000
-	REV__XP_013851016.1;REV__XP_013851015.1;REV__XP_013851014.1;REV__XP_003354560.2	REV__XP_013851016.1;REV__XP_013851015.1;REV__XP_013851014.1;REV__XP_003354560.2	XP_013851016.1 general transcription factor II-I repeat domain-containing protein 2 isoform X4 GN=LOC100620992 [Sus scrofa];XP_013851015.1 general transcription factor II-I repeat domain-containing protein 2 isoform X3 GN=LOC100620992 [Sus scrofa];XP_01385	2	2	68100000000	1804100000	1641900000	3783600000	6168800000	2139200000	1126600000	2509900000	288550000	308590000	104740000	549200000	1453300000	1321200000	1594900000	2698500000	11194000000	459790000	15903000000	4202500000	482260000	1151000000	222180000	5726000000	551100000	306000000	409140000	748110000	898420000	1469300000	2293300000	0	434400000	894410000	0	0	0	904580000	642280000	1210900000	531400000	1008400000	7773700000	1087500000
PRDX1	XP_020952403.1;XP_020952402.1;XP_020952401.1	XP_020952403.1;XP_020952402.1;XP_020952401.1	XP_020952403.1 peroxiredoxin-1 GN=PRDX1 [Sus scrofa];XP_020952402.1 peroxiredoxin-1 GN=PRDX1 [Sus scrofa];XP_020952401.1 peroxiredoxin-1 GN=PRDX1 [Sus scrofa]	12	14	67665000000	3481200000	3531300000	3445200000	2568900000	2479500000	4184900000	3384700000	2656200000	1030300000	2128200000	831330000	2467000000	1134300000	2338100000	4245000000	2108700000	2013000000	2572400000	4115800000	1365300000	2701200000	2721600000	2366600000	2226500000	2549600000	3018800000	3686100000	4337300000	3919500000	3353900000	3175600000	3858500000	3335700000	3644800000	3702100000	3413600000	3392800000	3199200000	3776300000	3138300000	3926700000	3192600000	3129100000
WDR1	XP_020956671.1	XP_020956671.1	XP_020956671.1 WD repeat-containing protein 1 GN=WDR1 [Sus scrofa]	31	31	67518000000	3501300000	2738700000	3229100000	2695900000	2943800000	3960700000	3518200000	2880900000	1518500000	2439600000	1101600000	2905800000	1151200000	2530500000	3794100000	2156700000	2381000000	2371400000	2756700000	1252800000	3257900000	3210800000	2678300000	2034500000	1605900000	2902300000	4033100000	3423300000	3351900000	3409500000	3367300000	3874500000	3867200000	3884500000	4313600000	3947200000	3894900000	3594600000	3732900000	3125300000	3338500000	3310700000	3681400000
HSPD1	NP_001241645.1	NP_001241645.1	NP_001241645.1 60 kDa heat shock protein, mitochondrial GN=HSPD1 [Sus scrofa]	37	37	67321000000	2949500000	2896800000	3617300000	2421900000	2447800000	2992200000	3014900000	2469900000	1042600000	2505300000	827860000	2796200000	857070000	2236300000	3708700000	2505000000	2748900000	3620900000	2986100000	1527600000	3048300000	3042600000	3170100000	2853700000	2573500000	2460000000	3267600000	3477500000	3658900000	3021400000	3047700000	3114000000	3156200000	3443400000	3528200000	3437600000	3006600000	3692500000	2885700000	2978500000	3276400000	3484600000	3787600000
GPI	NP_999495.1;CON__Q3ZBD7	NP_999495.1	NP_999495.1 glucose-6-phosphate isomerase GN=GPI [Sus scrofa]	29	29	66578000000	3867000000	3606000000	3507700000	2772000000	2734700000	3374000000	3250400000	2488900000	998600000	2441000000	877070000	2998100000	896610000	2994700000	3119500000	2114300000	2522400000	2783700000	3034400000	1086200000	3351500000	2645500000	2418500000	2147700000	2034400000	2513200000	4279100000	4091500000	3816600000	3283100000	3292500000	3465100000	3311400000	2958100000	3120200000	3396700000	2935900000	3394100000	3000700000	3450000000	2756600000	3156800000	3677600000
HMGB1	XP_020920819.1;XP_020920818.1;XP_005668375.2;XP_005668374.2;XP_005668373.2;NP_001004034.1	XP_020920819.1;XP_020920818.1;XP_005668375.2;XP_005668374.2;XP_005668373.2;NP_001004034.1	XP_020920819.1 high mobility group protein B1 isoform X1 GN=HMGB1 [Sus scrofa];XP_020920818.1 high mobility group protein B1 isoform X1 GN=HMGB1 [Sus scrofa];XP_005668375.2 high mobility group protein B1 isoform X1 GN=HMGB1 [Sus scrofa];XP_005668374.2 high	16	19	66453000000	2954900000	2816600000	3179500000	2859500000	3022600000	3991100000	3504100000	2515700000	1103100000	2025200000	821380000	2891800000	714380000	2658900000	4229300000	1976600000	2860600000	3449200000	3234200000	1053400000	2727400000	2722700000	2387000000	2014800000	1658000000	3080800000	3334400000	3275800000	3105500000	3535900000	3808900000	3958400000	3896900000	3321700000	3434200000	3028500000	2861400000	3528500000	2292500000	3487500000	3853100000	2895300000	4214900000
ALDH1A1	XP_020920570.1	XP_020920570.1	XP_020920570.1 retinal dehydrogenase 1 GN=ALDH1A1 [Sus scrofa]	30	36	65783000000	2631200000	2895900000	2878000000	3126300000	2975100000	4653900000	1920000000	1872200000	1241700000	1917100000	1363400000	3707500000	1124500000	1331200000	4724300000	1493100000	1924300000	2116600000	2625500000	1851700000	2985900000	3397200000	2213500000	2994000000	2532600000	3286300000	2980500000	3326100000	3071500000	3796200000	3262100000	4725400000	2062600000	2620300000	3554500000	3123200000	4003900000	4797500000	3375600000	2062400000	4324200000	1918200000	2561200000
FERMT2	XP_020957796.1;XP_020957768.1;XP_020957787.1;XP_020957759.1;XP_020957783.1;XP_020957739.1	XP_020957796.1;XP_020957768.1;XP_020957787.1;XP_020957759.1;XP_020957783.1;XP_020957739.1	XP_020957796.1 fermitin family homolog 2 isoform X6 GN=FERMT2 [Sus scrofa];XP_020957768.1 fermitin family homolog 2 isoform X6 GN=FERMT2 [Sus scrofa];XP_020957787.1 fermitin family homolog 2 isoform X5 GN=FERMT2 [Sus scrofa];XP_020957759.1 fermitin family	3	38	65472000000	3027200000	2741700000	2729500000	2885500000	3045500000	3741000000	3480300000	2374500000	1069800000	2330800000	1009100000	2482700000	836480000	2147400000	3918500000	2123800000	2104800000	3038400000	3095000000	1170300000	3571600000	2945600000	2780600000	2423000000	1669200000	2729600000	3508400000	3404400000	2892500000	3543100000	3569000000	3590700000	3558300000	3350900000	3005100000	3313700000	3320100000	3179800000	2875800000	3199400000	3472500000	2930400000	3169900000
CAV1	NP_001335864.1;NP_999603.2;NP_001335866.1;NP_001335865.1;NP_001032226.1	NP_001335864.1;NP_999603.2;NP_001335866.1;NP_001335865.1	NP_001335864.1 caveolin-1 isoform a GN=CAV1 [Sus scrofa];NP_999603.2 caveolin-1 isoform b GN=CAV1 [Sus scrofa];NP_001335866.1 caveolin-1 isoform b GN=CAV1 [Sus scrofa];NP_001335865.1 caveolin-1 isoform b GN=CAV1 [Sus scrofa]	8	8	64145000000	1921000000	2976700000	3158700000	1975300000	3070400000	3611000000	3334100000	1619700000	1077400000	1653900000	1176700000	3697600000	1128200000	2627900000	3238300000	1621300000	2664300000	3237000000	2719700000	1295300000	2427000000	2633500000	3921100000	1533500000	2380000000	3445300000	2564300000	3856700000	3559000000	2456900000	4086500000	3697700000	3877500000	2244400000	2316700000	2563000000	3262900000	4838800000	3116900000	3417000000	2961200000	2214100000	3765400000
LTF	XP_020924222.1;NP_999527.2	XP_020924222.1;NP_999527.2	XP_020924222.1 lactotransferrin isoform X1 GN=LTF [Sus scrofa];NP_999527.2 lactotransferrin precursor GN=LTF [Sus scrofa]	42	42	63136000000	4285300000	4490100000	1218900000	2079100000	2331200000	1274200000	1430900000	4129800000	1734200000	2801000000	845070000	2333000000	1319500000	2679200000	550170000	2312300000	7674500000	2688300000	2874800000	155400000	1805900000	4209100000	1920000000	2010400000	2481700000	1502100000	4405200000	5098600000	1645800000	2549200000	2908200000	1278400000	1594400000	5388200000	4982900000	4292200000	3181600000	3258700000	4145100000	3528500000	649610000	3331800000	10607000000
MDH2	NP_001231082.1	NP_001231082.1	NP_001231082.1 malate dehydrogenase, mitochondrial GN=MDH2 [Sus scrofa]	16	16	63076000000	3138200000	2411100000	3049800000	2348100000	2657700000	3035300000	3009300000	2736400000	1309500000	2095100000	1063200000	2851300000	1124200000	2495400000	4121600000	2029200000	1862000000	2445100000	2847000000	1259700000	3177500000	2885600000	2263300000	1848200000	2088000000	2924300000	3425200000	2989900000	3060300000	2790500000	3201100000	2780400000	2943100000	3611700000	3694400000	3276600000	3446800000	3427800000	3414000000	3077700000	3745300000	3096100000	2879800000
AHSG	XP_005652426.1	XP_005652426.1	XP_005652426.1 alpha-2-HS-glycoprotein GN=AHSG [Sus scrofa]	8	8	62800000000	1798700000	1607000000	1790000000	5641300000	2349400000	3012500000	3201700000	2449700000	1116900000	2204200000	1217200000	1966400000	3615800000	9678800000	2805500000	1851200000	1716800000	1336000000	1345400000	1768000000	2900400000	1818400000	1567600000	821320000	698940000	2520600000	2210600000	1938300000	1845400000	7294300000	2949200000	3032300000	3402400000	3413300000	2994000000	3136600000	3825200000	2437500000	9982700000	13615000000	2526800000	2905500000	2724400000
TGFBI	XP_020940443.1	XP_020940443.1	XP_020940443.1 LOW QUALITY PROTEIN: transforming growth factor-beta-induced protein ig-h3 GN=TGFBI [Sus scrofa]	30	30	62226000000	2436300000	3270800000	3658800000	3177400000	3571900000	4673200000	3950300000	2867400000	1001000000	1977900000	993280000	2319200000	804170000	1880600000	4329800000	1530300000	1799000000	2846900000	2134100000	1002300000	3446700000	1630000000	2370000000	1765100000	858430000	1931200000	2587700000	3666600000	3714600000	3481300000	4262200000	4347000000	3863800000	3569400000	2378500000	2793800000	3134800000	2990600000	2374500000	2674400000	3882200000	2380900000	2496100000
LAMC1	NP_001258644.1	NP_001258644.1	NP_001258644.1 laminin subunit gamma-1 precursor GN=LAMC1 [Sus scrofa]	61	62	61874000000	2576000000	2333800000	2872800000	2862400000	3229700000	3589900000	3768800000	2151900000	1115000000	1716500000	1073900000	3081900000	839110000	1800300000	4094700000	2024200000	1645000000	3586000000	3123800000	1050200000	2893200000	1824700000	2656800000	2005000000	1595100000	2363600000	2902600000	2783900000	3119700000	3484600000	3744900000	3291800000	3723500000	3014400000	3298100000	2797300000	3316400000	3710500000	2735600000	2617700000	3312300000	2942500000	2667200000
ACTBL2	XP_005674537.3	XP_005674537.3	XP_005674537.3 beta-actin-like protein 2 GN=ACTBL2 [Sus scrofa]	3	3	61831000000	0	18356000000	8332900	27685000	25377000	22032000	18735000	0	0	14690000	15598000	0	10879000000	18284000	11676000	0	0	16745000000	0	7669300	5170100	0	15648000000	5718300	12386000	9120700	0	0	0	0	0	0	0	0	0	0	0	0	0	0	0	0	0
PDIA4	NP_001254763.1	NP_001254763.1	NP_001254763.1 protein disulfide-isomerase A4 precursor GN=PDIA4 [Sus scrofa]	40	40	61550000000	3222200000	3101600000	3722800000	2162200000	1909600000	3057200000	2736700000	2143300000	1429100000	2011200000	1140500000	2352300000	970470000	1863800000	3724000000	2555300000	1829800000	2504100000	2752800000	1332800000	2519400000	3024700000	2696800000	2021800000	2156100000	2609200000	3511200000	3736700000	3681100000	2609500000	2230900000	2709800000	2624700000	2903300000	3748300000	2815800000	3221000000	2782700000	2848900000	2534600000	3090800000	3614700000	2829200000
PGD	XP_003127605.2	XP_003127605.2	XP_003127605.2 LOW QUALITY PROTEIN: 6-phosphogluconate dehydrogenase, decarboxylating GN=PGD [Sus scrofa]	32	32	61313000000	3576100000	3616900000	3404900000	2661900000	2650700000	3525300000	3569000000	1981400000	861520000	2287000000	761600000	2400700000	759360000	2284000000	3075700000	1637700000	2119800000	2480900000	3830200000	939500000	2562700000	2234500000	1946300000	1709500000	2074700000	2361100000	3952000000	3977800000	3512100000	3017500000	2931600000	3527300000	3726200000	2854600000	2453100000	3479000000	2636000000	3119300000	2688100000	3039000000	2502900000	2584000000	3397500000
GDI2	NP_001001643.1	NP_001001643.1	NP_001001643.1 rab GDP dissociation inhibitor beta GN=GDI2 [Sus scrofa]	26	33	61101000000	3056900000	2445400000	2986700000	2539100000	2206500000	3410800000	3037700000	2543500000	1223000000	2480400000	930790000	2527600000	915120000	2272300000	3526600000	2144100000	2036600000	2639400000	2842700000	1316300000	2875800000	2492900000	2312000000	2193600000	2075000000	2069900000	3523700000	3224100000	3458700000	3340300000	2921200000	3257100000	3201600000	3402800000	3512300000	3482200000	2818600000	3001700000	2890300000	3117600000	3196100000	3165500000	2953200000
DHX9	XP_020919438.1;XP_020919437.1;XP_020919442.1;XP_020919441.1;XP_020919440.1	XP_020919438.1;XP_020919437.1;XP_020919442.1;XP_020919441.1;XP_020919440.1	XP_020919438.1 ATP-dependent RNA helicase A isoform X1 GN=DHX9 [Sus scrofa];XP_020919437.1 ATP-dependent RNA helicase A isoform X1 GN=DHX9 [Sus scrofa];XP_020919442.1 ATP-dependent RNA helicase A isoform X2 GN=DHX9 [Sus scrofa];XP_020919441.1 ATP-dependent	60	60	60469000000	3085400000	2685900000	3181800000	2389400000	2262700000	3559700000	3088900000	2715600000	1184000000	2210000000	898610000	2213800000	823680000	2284500000	3923300000	2035700000	1996900000	2488200000	2856900000	1251100000	2760900000	2513500000	2243000000	1749400000	1840500000	2225700000	3333700000	3107200000	3496800000	3043300000	2533300000	3337400000	3099400000	3482500000	2977700000	3209800000	3160600000	2736300000	2528700000	3331900000	3409900000	2939500000	3064200000
LOC396685	XP_013833854.1	XP_013833854.1	XP_013833854.1 serpin A3-8 GN=LOC396685 [Sus scrofa]	9	10	60093000000	530510000	1850100000	4062200000	6091900000	1217400000	2806700000	588370000	631490000	771870000	2804100000	1218600000	912530000	3594300000	2040400000	3582500000	5400100000	1868000000	1780800000	3917600000	1468000000	2863600000	3241300000	1940600000	934320000	2443400000	1531900000	615360000	2431300000	4178200000	8200800000	933770000	2576300000	904550000	816040000	2360300000	4293400000	4163300000	1568500000	11786000000	4146100000	3078500000	7210000000	2962600000
CAVIN2	XP_005652497.1	XP_005652497.1	XP_005652497.1 serum deprivation-response protein GN=CAVIN2 [Sus scrofa]	17	17	59868000000	2471500000	2719700000	3053100000	2462800000	3690000000	3221800000	3534000000	1947200000	1259700000	1956000000	1215900000	2272000000	945410000	2097300000	2936600000	1734200000	2059400000	2696000000	3094400000	1429100000	2748000000	2287800000	2125000000	2288600000	1481400000	2141000000	3379300000	3689400000	3646500000	3400900000	3294100000	3310900000	4163400000	2988900000	2608900000	2890000000	2958000000	3294000000	3148500000	3262200000	2755500000	2598300000	3418100000
LTA4H	NP_001172061.2	NP_001172061.2	NP_001172061.2 leukotriene A-4 hydrolase GN=LTA4H [Sus scrofa]	35	35	58994000000	2905300000	2748400000	2596000000	2380600000	2781100000	3630700000	2849700000	2349100000	1063200000	1914700000	906160000	2740200000	871110000	2118400000	3168300000	1535900000	2260700000	2578300000	2848800000	1209400000	2533600000	2497000000	2158400000	2494700000	1686600000	2167500000	3243300000	3262300000	2664300000	3034600000	3163000000	3303600000	2814300000	3046700000	3199000000	2796700000	2835300000	3295600000	2816200000	2798100000	2668900000	2158000000	3234800000
MYLK	XP_020925894.1;XP_020925893.1;XP_020925892.1;XP_020925891.1;XP_020925890.1;XP_020925896.1;XP_020925895.1;XP_020925897.1;XP_020925898.1;XP_020925900.1;XP_001929113.6	XP_020925894.1;XP_020925893.1;XP_020925892.1;XP_020925891.1;XP_020925890.1;XP_020925896.1;XP_020925895.1;XP_020925897.1;XP_020925898.1	XP_020925894.1 myosin light chain kinase, smooth muscle isoform X1 GN=MYLK [Sus scrofa];XP_020925893.1 myosin light chain kinase, smooth muscle isoform X1 GN=MYLK [Sus scrofa];XP_020925892.1 myosin light chain kinase, smooth muscle isoform X1 GN=MYLK [Sus	10	81	58581000000	2748700000	1925200000	2380800000	2933900000	2721900000	3267200000	2649300000	2452600000	951050000	1730400000	816880000	1688800000	779710000	1669400000	5108400000	2024200000	2109300000	2796600000	2971900000	1108500000	2758000000	2628300000	3009800000	2306200000	1189300000	1854700000	2794100000	2395800000	2662600000	3029600000	3026200000	2707500000	2591400000	2961800000	2924200000	2605200000	2964800000	2309800000	2447600000	2341700000	3908700000	2928900000	2611500000
SERPINA3-2	NP_998952.1	NP_998952.1	NP_998952.1 alpha-1-antichymotrypsin 2 precursor GN=SERPINA3-2 [Sus scrofa]	19	25	58462000000	2253000000	1711000000	2261200000	2850500000	3530400000	1509500000	1741600000	2718900000	860960000	1884700000	687070000	2958900000	2199500000	6543900000	1293800000	1764000000	3511100000	3047400000	2606500000	1374100000	1935000000	1411900000	3071000000	1384200000	1873800000	1478100000	2562900000	2037200000	2394600000	3246100000	4052000000	1581700000	2235800000	4161300000	2646600000	3059700000	2359000000	4032600000	6717300000	8826800000	1678400000	2734000000	4281700000
ALDH2	NP_001038076.1	NP_001038076.1	NP_001038076.1 aldehyde dehydrogenase, mitochondrial precursor GN=ALDH2 [Sus scrofa]	27	28	58219000000	2373900000	1942500000	2752200000	2259200000	3293800000	4024700000	2536500000	1702500000	1112900000	1697800000	999620000	2433500000	910910000	1697500000	3414300000	1906200000	2080600000	3186200000	2966400000	1487900000	2609400000	2031000000	2586100000	2372400000	1692700000	2148800000	2776800000	2562800000	3082200000	2771400000	3125300000	3041300000	2651000000	2572400000	3201200000	2744500000	3496800000	2823400000	2864500000	2497400000	3325500000	2957200000	3097800000
LOC106504547	XP_020955329.1	XP_020955329.1	XP_020955329.1 LOW QUALITY PROTEIN: serpin A3-8 GN=LOC106504547 [Sus scrofa]	16	21	58145000000	3231200000	3116600000	1517000000	361810000	6118200000	281570000	261970000	2403300000	1224900000	1216400000	166940000	3734800000	572650000	789870000	401820000	3423100000	4890600000	6501400000	3328000000	534460000	448440000	1703600000	5669500000	2126000000	3506700000	614350000	3631000000	4245700000	1819700000	582970000	6941200000	381340000	408170000	3044600000	2103400000	1820700000	606610000	5465400000	1565600000	998370000	326450000	5049900000	6900300000
CAPNS1	NP_999483.1;XP_013850079.1	NP_999483.1	NP_999483.1 calpain small subunit 1 GN=CAPNS1 [Sus scrofa]	17	17	56419000000	2692000000	2576400000	3084600000	2318900000	2506100000	3510800000	2897000000	2216700000	707860000	2082800000	779740000	2641600000	828950000	1895400000	3410700000	1843800000	1700700000	2598100000	2320100000	1242500000	2733200000	2119000000	2268800000	2016700000	1551200000	1875200000	2836100000	3180200000	3192300000	2635100000	3246700000	3297700000	3009200000	2949300000	1692400000	3091400000	1530200000	3118400000	2040300000	2564200000	2906000000	2634900000	2353200000
HSP90AB1	XP_005666120.1;NP_001231362.1	XP_005666120.1;NP_001231362.1	XP_005666120.1 heat shock protein HSP 90-beta isoform X1 GN=HSP90AB1 [Sus scrofa];NP_001231362.1 heat shock protein HSP 90-beta GN=HSP90AB1 [Sus scrofa]	27	27	56358000000	2736500000	2734400000	2786300000	1884100000	1717100000	2707400000	2746400000	2462900000	1237800000	1899600000	733010000	1856000000	748070000	2155700000	3452600000	1870600000	2169100000	2148900000	2673900000	1413600000	2228900000	3067300000	2438400000	2198200000	1813000000	2478600000	3076200000	3256000000	2912700000	2418500000	2027500000	2390200000	2870000000	3211300000	3270700000	2792700000	2547900000	2085400000	2234200000	2668500000	2947200000	2638900000	3192900000
LOC396684	XP_013833856.2	XP_013833856.2	XP_013833856.2 LOW QUALITY PROTEIN: serpin A3-5 GN=LOC396684 [Sus scrofa]	10	10	56336000000	5169500000	1932800000	1017200000	493900000	5272200000	476620000	462720000	6036800000	2203600000	959040000	229200000	4642400000	777850000	1986200000	286280000	1440200000	4231300000	3976800000	3308600000	569420000	480970000	1118400000	3646300000	2137200000	2777800000	702550000	6190400000	2405400000	1116900000	732270000	6345700000	476690000	582150000	8162000000	5804700000	1256900000	849520000	5952600000	2350000000	2769200000	389790000	2219700000	5842400000
GC	XP_003357019.1;CON__ENSEMBL:ENSBTAP00000018229;CON__Q3MHN5	XP_003357019.1	XP_003357019.1 vitamin D-binding protein GN=GC [Sus scrofa]	28	28	56093000000	2136000000	1631200000	2040100000	3425800000	3197300000	1673100000	2507300000	2585600000	1003500000	2336100000	630090000	2908400000	1913000000	7178900000	1995400000	2226400000	1721500000	2083600000	1882700000	1470900000	2219700000	1459600000	2067600000	1191300000	1211600000	1396100000	2577400000	2114500000	2485200000	4214500000	3730900000	1838400000	2645000000	3539700000	3196900000	3467100000	2492100000	3345800000	5642300000	8741700000	1911200000	3120700000	2661700000
LAMB2	XP_020926319.1	XP_020926319.1	XP_020926319.1 laminin subunit beta-2 GN=LAMB2 [Sus scrofa]	67	67	54592000000	2272800000	2168900000	2268600000	2703800000	3519100000	3502600000	3459300000	1852100000	905040000	1490900000	1100800000	2963100000	705410000	1523000000	3257500000	1730100000	1615100000	2947800000	2396900000	784170000	2691200000	1689400000	2168200000	1590700000	1063900000	2221100000	2583400000	2522500000	2571600000	3004200000	3657600000	2992600000	3216900000	2461800000	2836700000	2413300000	3469700000	3508700000	2396900000	2401000000	2624900000	2435400000	2435800000
LOC110258650	XP_020937602.1;XP_020937601.1;NP_001116621.1;XP_020924234.1	XP_020937602.1;XP_020937601.1;NP_001116621.1;XP_020924234.1	XP_020937602.1 protegrin-3-like GN=LOC110258650 [Sus scrofa];XP_020937601.1 protegrin-3-like GN=LOC110258649 [Sus scrofa];NP_001116621.1 protegrin-1 precursor GN=NPG1 [Sus scrofa];XP_020924234.1 antibacterial protein PR-39 isoform X1 GN=PR39 [Sus scrofa]	0	9	54533000000	4156000000	2876400000	502060000	1618800000	2347000000	1217200000	1471600000	3477000000	1478400000	2263000000	642660000	2258200000	1342100000	2673100000	547620000	1980100000	6482000000	2153000000	3568900000	213040000	1712400000	2950200000	1638600000	1457700000	1909000000	1597000000	5217000000	3714600000	725430000	2055500000	2747700000	1200100000	1735400000	5124300000	4087900000	3036700000	1894900000	3280000000	3999700000	3587100000	616690000	2842800000	10361000000
FABP5	NP_001034835.1	NP_001034835.1	NP_001034835.1 fatty acid-binding protein, epidermal GN=FABP5 [Sus scrofa]	9	9	54019000000	2032900000	1838100000	1951000000	2329200000	3057800000	3439500000	2058900000	1698400000	844380000	1224300000	722790000	2097800000	937950000	1980400000	2025200000	1205800000	1651100000	3273400000	4800300000	1227700000	1865700000	1091400000	3205700000	3861600000	1731900000	1866000000	2324700000	2392300000	2070800000	3126900000	3726700000	3604100000	2239800000	2259900000	2505500000	1745700000	2289300000	2386000000	2910200000	2443800000	2028200000	2019200000	2814300000
ILK	XP_005656654.1;XP_005656653.1;XP_003357179.1;XP_020917995.1;XP_020917994.1;XP_020917993.1	XP_005656654.1;XP_005656653.1;XP_003357179.1;XP_020917995.1;XP_020917994.1;XP_020917993.1	XP_005656654.1 integrin-linked protein kinase isoform X2 GN=ILK [Sus scrofa];XP_005656653.1 integrin-linked protein kinase isoform X2 GN=ILK [Sus scrofa];XP_003357179.1 integrin-linked protein kinase isoform X2 GN=ILK [Sus scrofa];XP_020917995.1 integrin-l	21	21	53856000000	2476300000	2071100000	2300500000	2114800000	2328000000	3007800000	2455500000	2153500000	1066700000	1804300000	896380000	2366800000	696670000	1857500000	3352800000	1712700000	1712500000	2290600000	2615600000	909950000	2639100000	2510500000	2312800000	2444000000	1481700000	2277300000	2647000000	2349100000	2095200000	2448600000	2774300000	2782300000	2284000000	2637300000	3053200000	2506600000	3006000000	2580400000	2270700000	2168700000	2616100000	2340900000	2344900000
HNRNPA3	XP_020930797.1;XP_020930793.1;XP_005672037.1;XP_005672036.1;XP_003133549.1	XP_020930797.1;XP_020930793.1;XP_005672037.1;XP_005672036.1;XP_003133549.1	XP_020930797.1 heterogeneous nuclear ribonucleoprotein A3 isoform X5 GN=HNRNPA3 [Sus scrofa];XP_020930793.1 heterogeneous nuclear ribonucleoprotein A3 isoform X2 GN=HNRNPA3 [Sus scrofa];XP_005672037.1 heterogeneous nuclear ribonucleoprotein A3 isoform X2 G	1	19	53764000000	2356200000	2283000000	2805700000	2185500000	1986600000	3127700000	2620800000	2173200000	1135600000	1974900000	1039600000	1968300000	860920000	1893100000	3598000000	1854800000	1758600000	2380300000	2372000000	1401900000	2372500000	2017900000	2199500000	1744600000	1530200000	2123000000	2832700000	2609000000	3387700000	3132000000	2315000000	3280900000	2965200000	3005500000	2853300000	2858200000	3044700000	2725300000	2492400000	2902500000	3623800000	2671300000	2632100000
NID1	XP_020929418.1;XP_020929417.1	XP_020929418.1;XP_020929417.1	XP_020929418.1 nidogen-1 isoform X2 GN=NID1 [Sus scrofa];XP_020929417.1 nidogen-1 isoform X1 GN=NID1 [Sus scrofa]	45	45	53671000000	2266700000	1957900000	2773200000	2249000000	2690500000	3125000000	3304000000	1925900000	892230000	1898100000	871840000	2317000000	800960000	1786100000	3442700000	1387200000	1999100000	2762600000	2448400000	1039900000	2422100000	2126100000	1962800000	2083900000	1031600000	2106300000	2430900000	2447000000	3092600000	2564100000	2939800000	2862500000	3190800000	2429800000	2327900000	2489300000	2653500000	2972500000	2233300000	2371100000	2827100000	2328100000	2591600000
S100A8	NP_001153743.1	NP_001153743.1	NP_001153743.1 protein S100-A8 GN=S100A8 [Sus scrofa]	9	9	53082000000	3316600000	3859500000	1375000000	1352800000	2379800000	1251800000	1373700000	3169000000	2549700000	3352200000	1071400000	2162000000	426340000	1057500000	460550000	3207400000	4543200000	2023400000	1857200000	301960000	1599400000	2876100000	1875700000	1947500000	2971500000	720520000	4492000000	5167500000	1808300000	2252400000	2900500000	1656100000	1631500000	4309900000	3568000000	4285000000	2348900000	2561000000	1312500000	1535400000	696820000	4272000000	6883000000
PGM5	XP_003121981.4	XP_003121981.4	XP_003121981.4 phosphoglucomutase-like protein 5 GN=PGM5 [Sus scrofa]	35	35	52974000000	2667100000	2125000000	2228700000	2278500000	3327900000	3047200000	2778500000	2347100000	947860000	1535700000	733830000	2139300000	691740000	2261200000	3421000000	1705200000	1624400000	2200300000	2173000000	1046200000	2920300000	1928500000	2356800000	1861200000	1082300000	1545100000	3032900000	2610100000	2379300000	2719000000	3718100000	3012900000	2950100000	3027700000	2818000000	2341900000	2544800000	2486500000	2209700000	2931800000	2983100000	2543000000	2436900000
PCBP1	XP_003125105.1;XP_013837213.1;XP_013837212.1;XP_003358505.1;XP_005669675.1	XP_003125105.1	XP_003125105.1 poly(rC)-binding protein 1 GN=PCBP1 [Sus scrofa]	13	17	52558000000	2793300000	2236700000	2219700000	2336300000	2100200000	2954700000	2629200000	2186800000	1007500000	2022400000	736990000	2005000000	857530000	1781500000	3355500000	1687300000	1916000000	2136600000	2564400000	1235200000	2377600000	2339400000	1982900000	1708300000	1175500000	2211400000	3032100000	2631100000	2140800000	2745800000	2473400000	2873400000	2702200000	3043600000	2711700000	2853000000	2527400000	2429700000	2671600000	2380500000	2921600000	2473400000	2633000000
DPYSL3	XP_003124114.4;XP_013852013.1;XP_020944687.1;XP_001925286.2	XP_003124114.4	XP_003124114.4 LOW QUALITY PROTEIN: dihydropyrimidinase-related protein 3 GN=DPYSL3 [Sus scrofa]	28	32	52029000000	1795500000	1675600000	3074000000	3089000000	2651600000	3631100000	2943300000	2042600000	971330000	1262000000	785590000	1775300000	933590000	2086900000	4817900000	2328700000	1396800000	2706300000	1528100000	768200000	2517000000	1492400000	2347100000	1505500000	771240000	1132000000	1899400000	2039100000	3329300000	3878200000	3263700000	3426500000	3092500000	2892600000	2965600000	1844500000	2731700000	2197900000	3282900000	3003200000	4160600000	3271000000	2111700000
CAPN2	NP_001093658.1	NP_001093658.1	NP_001093658.1 calpain-2 catalytic subunit GN=CAPN2 [Sus scrofa]	40	40	51518000000	2582200000	2227900000	2525800000	2169300000	2482200000	3319800000	2899900000	2072500000	897110000	1917000000	674120000	2246200000	747450000	1759800000	2934200000	1593000000	1586100000	2336000000	2212200000	971570000	2398300000	2067500000	2038200000	1798600000	1056600000	2004300000	2909000000	2731900000	2544300000	2506600000	2881600000	3113400000	2946300000	3062800000	2524100000	2828100000	2499400000	2709200000	2266100000	2511100000	2677600000	2339300000	2419500000
A1BG	XP_003128180.1;CON__Q2KJF1	XP_003128180.1	XP_003128180.1 alpha-1B-glycoprotein GN=A1BG [Sus scrofa]	23	23	50993000000	2155200000	1787700000	1690900000	2278100000	3501700000	1311000000	1757300000	2791900000	1111500000	1544600000	416600000	3132600000	1717200000	5987100000	2087100000	2367000000	1552000000	1692200000	1697700000	1414400000	2188000000	1554300000	1653600000	791540000	1328400000	1483000000	2380100000	2168300000	1860700000	3019100000	4229700000	1275100000	1739000000	3981800000	3165000000	2405100000	1755800000	4201500000	5251800000	7377300000	1898100000	3446600000	2310000000
MFAP4	XP_020923614.1	XP_020923614.1	XP_020923614.1 microfibril-associated glycoprotein 4 GN=MFAP4 [Sus scrofa]	7	7	50703000000	3586600000	2023800000	1825900000	2757200000	3263400000	3031700000	2802100000	2379800000	647670000	1572200000	599840000	2077400000	214290000	1639600000	2319800000	2419300000	1494400000	2795500000	2505400000	850270000	1736600000	1573800000	2467300000	2533000000	836850000	748680000	3428100000	2339300000	1974100000	2810900000	4410000000	4280200000	3344300000	3241300000	1164700000	2373700000	1195600000	3037600000	660480000	2266900000	2181500000	3169400000	1961900000
PRELP	XP_005656706.1;XP_003130154.1	XP_005656706.1;XP_003130154.1	XP_005656706.1 prolargin GN=PRELP [Sus scrofa];XP_003130154.1 prolargin GN=PRELP [Sus scrofa]	20	20	50399000000	3118600000	1336000000	3719700000	3535100000	3647300000	2688300000	2576900000	969320000	420130000	1162800000	484420000	1334400000	806220000	1913900000	1251100000	3331800000	924170000	4739400000	3556100000	691400000	1171000000	795880000	2885600000	1711000000	988640000	639850000	3446200000	1870900000	3828400000	4120900000	3817600000	2713100000	2722800000	1319800000	1254600000	1702600000	1506200000	1673600000	2228300000	2694300000	1341200000	4642700000	1565800000
PTBP1	XP_005661470.1;NP_999396.2;XP_020936997.1;XP_020936988.1;XP_020936977.1;XP_020936969.1	XP_005661470.1;NP_999396.2;XP_020936997.1;XP_020936988.1;XP_020936977.1;XP_020936969.1	XP_005661470.1 polypyrimidine tract-binding protein 1 isoform X5 GN=PTBP1 [Sus scrofa];NP_999396.2 polypyrimidine tract-binding protein 1 GN=PTBP1 [Sus scrofa];XP_020936997.1 polypyrimidine tract-binding protein 1 isoform X4 GN=PTBP1 [Sus scrofa];XP_020936	16	17	50389000000	2171400000	2129200000	2832800000	2185000000	1931200000	2848800000	2561400000	1712300000	713060000	1479900000	614750000	2184100000	627710000	1998700000	3145000000	1560700000	1758000000	2271200000	2511500000	1418500000	2763600000	2115600000	1965900000	1520000000	1578400000	1789900000	2430600000	2444200000	2925200000	2449800000	2190700000	2584000000	2399700000	2250000000	1937000000	2145300000	1751400000	2323600000	1951400000	2519400000	2857700000	2278500000	2367400000
SOD1	NP_001177351.1	NP_001177351.1	NP_001177351.1 superoxide dismutase GN=SOD1 [Sus scrofa]	11	11	50135000000	2680200000	1703900000	2248400000	2272800000	2129300000	3698300000	3390100000	1693000000	779220000	1407500000	585620000	2541600000	429980000	2206000000	3197800000	1332700000	1976800000	2094900000	1783400000	1020300000	1795700000	2217500000	1782500000	1848000000	996780000	2323100000	2147500000	1500900000	1822900000	1819100000	2411200000	3081700000	2823100000	1960400000	1653000000	1629400000	1416100000	2163000000	1017200000	2327700000	2214700000	1802900000	2212300000
USH2A	XP_020919951.1	XP_020919951.1	XP_020919951.1 LOW QUALITY PROTEIN: usherin GN=USH2A [Sus scrofa]	2	2	50118000000	4218800000	1810000000	1996300000	2794300000	0	1422000000	634020000	4810400000	2268300000	2116000000	1161700000	3821000000	2457200000	0	1042900000	5020000000	0	2242500000	1034300000	1508500000	1299600000	2736200000	2876600000	1716600000	0	1130400000	0	0	0	0	0	0	680770000	0	0	0	0	0	0	0	0	0	0
NCL	XP_020930619.1;XP_020930618.1	XP_020930619.1;XP_020930618.1	XP_020930619.1 nucleolin isoform X2 GN=NCL [Sus scrofa];XP_020930618.1 nucleolin isoform X1 GN=NCL [Sus scrofa]	25	26	49570000000	2110200000	2014400000	2433400000	1812300000	1911200000	2534100000	2210100000	1902200000	1143300000	1733500000	979250000	1924300000	923200000	1476500000	2863500000	1892900000	1917200000	2084400000	2074400000	1309200000	2430600000	2339900000	2089400000	1767600000	1544700000	2148700000	2490900000	2587500000	2628800000	2252200000	2318400000	2496700000	2308200000	2542300000	3287100000	2681800000	3236300000	2381100000	2903300000	1986600000	2593600000	2814200000	2832100000
CTNNA1	XP_003124036.3;XP_020943863.1;XP_020943864.1;XP_020930046.1;XP_005671093.2;XP_020930045.1;XP_020930043.1;XP_020930042.1;XP_020930041.1;XP_020930040.1;XP_020930039.1	XP_003124036.3	XP_003124036.3 catenin alpha-1 GN=CTNNA1 [Sus scrofa]	37	47	49454000000	1840400000	2332500000	2566500000	1930500000	2338000000	2635200000	2826400000	1712000000	773530000	1569600000	670130000	2280700000	675290000	1527000000	2913000000	1558400000	1655800000	2446600000	2215000000	988440000	2572200000	2097800000	1948200000	1685400000	1333200000	2362600000	2193300000	2685400000	2505200000	2273300000	2501600000	2564200000	2869400000	2514000000	2398600000	2518300000	2603900000	2776900000	2225000000	2352500000	2462500000	2186400000	2532600000
YWHAQ	XP_020943521.1	XP_020943521.1	XP_020943521.1 14-3-3 protein theta GN=YWHAQ [Sus scrofa]	14	14	49449000000	2542300000	1705300000	2139400000	2459200000	1934300000	2918100000	2826900000	2013000000	700020000	1594700000	625350000	1763900000	776130000	2294900000	3263800000	1650100000	1886100000	2312500000	2082000000	949550000	2292300000	2268700000	1618000000	1514700000	1106900000	2211300000	2448400000	2177100000	2215700000	2739900000	2353400000	2574200000	2783000000	2416700000	1732700000	2258000000	1902600000	1970700000	2141300000	2979100000	2772300000	2312100000	2502800000
DDX17	XP_020947146.1	XP_020947146.1	XP_020947146.1 probable ATP-dependent RNA helicase DDX17, partial GN=DDX17 [Sus scrofa]	24	31	48262000000	2156600000	2027100000	2545000000	2274700000	1754600000	2704000000	2263800000	1853000000	943750000	1668700000	867780000	1781500000	723380000	1656900000	3104200000	1558500000	1591100000	2121400000	2206500000	1044000000	2116100000	2114200000	1917300000	1776000000	1471500000	2020400000	2329700000	2377900000	2613300000	2412200000	2142800000	2412200000	2164000000	2409500000	2680500000	2390900000	2718800000	2214100000	2238500000	2229600000	2742100000	2296600000	2246100000
FKBP1A	NP_001033089.1;XP_020932989.1;XP_020932988.1	NP_001033089.1;XP_020932989.1;XP_020932988.1	NP_001033089.1 peptidyl-prolyl cis-trans isomerase FKBP1A GN=FKBP1A [Sus scrofa];XP_020932989.1 peptidyl-prolyl cis-trans isomerase FKBP1A isoform X1 GN=FKBP1A [Sus scrofa];XP_020932988.1 peptidyl-prolyl cis-trans isomerase FKBP1A isoform X1 GN=FKBP1A [Sus	9	9	48258000000	2308700000	1906500000	2521700000	1971400000	2092600000	2856100000	2503600000	2083100000	930990000	1623300000	716070000	2039200000	579340000	1747000000	3092000000	1327600000	1611400000	2416800000	2224300000	914860000	2065600000	1946000000	1980200000	1559500000	1543000000	1697600000	2514100000	2594400000	2906100000	2368400000	2347900000	2893000000	2829100000	2773600000	2606600000	2386500000	2417800000	2625000000	1663600000	2220400000	2737600000	1947700000	2445500000
SELENBP1	XP_001929678.1;XP_020945522.1;XP_013852605.1;XP_013852604.1	XP_001929678.1;XP_020945522.1;XP_013852605.1;XP_013852604.1	XP_001929678.1 selenium-binding protein 1 isoform X3 GN=SELENBP1 [Sus scrofa];XP_020945522.1 selenium-binding protein 1 isoform X1 GN=SELENBP1 [Sus scrofa];XP_013852605.1 selenium-binding protein 1 isoform X4 GN=SELENBP1 [Sus scrofa];XP_013852604.1 seleniu	32	32	48149000000	2437500000	1942200000	2737700000	2538600000	2448500000	2124600000	1738500000	1708600000	862990000	1485700000	676550000	1758800000	618430000	1648600000	1316200000	1619700000	2088300000	3492400000	2915200000	688510000	1303100000	2068200000	2204900000	3252300000	1170300000	1302600000	2663200000	2270900000	2824700000	2839000000	2735500000	2012400000	1800800000	2151600000	2495600000	2212300000	2283100000	2152400000	1946000000	2218600000	1237000000	2421000000	2872800000
RAN	XP_020928360.1	XP_020928360.1	XP_020928360.1 GTP-binding nuclear protein Ran GN=RAN [Sus scrofa]	10	10	48114000000	2156900000	1914700000	2504000000	2001500000	1927700000	2562100000	2504200000	1755000000	925640000	1747400000	771610000	2032700000	896030000	1908400000	2637300000	1493400000	1542800000	2173200000	2198500000	918320000	2114600000	2151100000	1843400000	1708700000	1580600000	2144600000	2512500000	2536200000	2296400000	2473400000	2499900000	2683500000	2662300000	2576700000	2672000000	2663200000	2750800000	2550200000	2796000000	2557300000	2491700000	2383000000	2553900000
PSAP	XP_020927548.1;NP_001185848.1;XP_020927549.1;XP_020927547.1;XP_005671100.1;XP_005671099.1;XP_005671098.1;XP_020927551.1	XP_020927548.1;NP_001185848.1;XP_020927549.1;XP_020927547.1;XP_005671100.1;XP_005671099.1;XP_005671098.1;XP_020927551.1	XP_020927548.1 saposin-B-Val isoform X5 GN=PSAP [Sus scrofa];NP_001185848.1 saposin-B-Val precursor GN=PSAP [Sus scrofa];XP_020927549.1 saposin-B-Val isoform X6 GN=PSAP [Sus scrofa];XP_020927547.1 saposin-B-Val isoform X4 GN=PSAP [Sus scrofa];XP_005671100.	20	20	47910000000	2976800000	1112500000	2293900000	993560000	1999900000	2610000000	2233900000	2007800000	650290000	1746900000	705740000	2288700000	708600000	1646800000	2566200000	1151400000	1891100000	2116200000	2614900000	1009100000	2821700000	2537400000	1891900000	1562400000	1467700000	2304300000	2785900000	1785300000	2231300000	1584800000	2218100000	2175100000	1944200000	2595900000	2079500000	2914900000	2399400000	2758300000	2251400000	2045500000	2131400000	1761600000	2420000000
PDLIM1	NP_001302707.1	NP_001302707.1	NP_001302707.1 PDZ and LIM domain protein 1 GN=PDLIM1 [Sus scrofa]	19	19	47882000000	1774200000	1610200000	2111800000	2427800000	1690400000	2535000000	2308600000	2388300000	1061500000	1533300000	772470000	1723500000	854840000	1903700000	4038500000	1506100000	1465100000	1637300000	1745000000	1126800000	2754400000	2309100000	1987800000	1151000000	1241600000	2223100000	2004800000	1978000000	2301700000	2834600000	2128100000	2433800000	2498000000	3051400000	2915100000	2512700000	2708300000	2173000000	2545900000	2425000000	3761700000	2460600000	2311900000
ENPP6	XP_020930545.1	XP_020930545.1	XP_020930545.1 ectonucleotide pyrophosphatase/phosphodiesterase family member 6 GN=ENPP6 [Sus scrofa]	17	17	47811000000	1641400000	1835700000	2012100000	1960300000	2693600000	2545900000	2980800000	1647700000	650720000	1597100000	864800000	3400000000	663980000	1573900000	2225100000	1248600000	1402300000	1959900000	1565700000	1385400000	2660500000	2000400000	1796800000	1420400000	1276900000	2800600000	1984400000	2379800000	2206600000	2413000000	3389000000	2860200000	3020800000	2249100000	1898600000	2500600000	2729700000	4098800000	1978000000	2188400000	2126900000	2051300000	2219000000
SERPINB1	XP_003482167.1;XP_003132567.1	XP_003482167.1	XP_003482167.1 leukocyte elastase inhibitor GN=SERPINB1 [Sus scrofa]	26	27	47768000000	3072100000	3265500000	2099900000	1697200000	2209800000	2004100000	1780400000	1919700000	1062700000	1797000000	738010000	2067800000	952450000	1720200000	1437400000	1847400000	3325400000	1852600000	2589000000	638340000	1497300000	1892300000	1353000000	1590200000	2059300000	1298400000	3362300000	3455300000	2158600000	2177100000	2361700000	2068400000	1907900000	3027600000	2788000000	2805600000	2688300000	2620600000	2668000000	2408000000	1324300000	2542000000	3871300000
ARF1	XP_020932909.1;XP_020932905.1;XP_020932903.1;XP_005661199.1;XP_005661198.1;NP_001153899.1;XP_020932893.1;XP_020946634.1;NP_001153898.1;XP_020932894.1	XP_020932909.1;XP_020932905.1;XP_020932903.1;XP_005661199.1;XP_005661198.1;NP_001153899.1;XP_020932893.1;XP_020946634.1;NP_001153898.1;XP_020932894.1	XP_020932909.1 ADP-ribosylation factor 1 isoform X3 GN=ARF1 [Sus scrofa];XP_020932905.1 ADP-ribosylation factor 1 isoform X3 GN=ARF1 [Sus scrofa];XP_020932903.1 ADP-ribosylation factor 1 isoform X3 GN=ARF1 [Sus scrofa];XP_005661199.1 ADP-ribosylation facto	5	15	47585000000	2084900000	2297900000	2373200000	1773900000	2092400000	2877700000	2432700000	1617800000	694040000	1710300000	631920000	2211100000	579350000	1807300000	2889400000	1310900000	1406300000	1960800000	1956500000	1027500000	2658300000	2131800000	1832000000	1617400000	1664300000	1945300000	2099100000	2562500000	2320200000	1946000000	2107100000	2709900000	2633800000	2210900000	1803900000	2796400000	1847100000	2443100000	1677400000	2354500000	2366700000	1604600000	1976400000
FBLN5	XP_001929062.1;XP_005656504.1;XP_020955282.1	XP_001929062.1;XP_005656504.1;XP_020955282.1	XP_001929062.1 fibulin-5 isoform X3 GN=FBLN5 [Sus scrofa];XP_005656504.1 fibulin-5 isoform X2 GN=FBLN5 [Sus scrofa];XP_020955282.1 fibulin-5 isoform X1 GN=FBLN5 [Sus scrofa]	19	19	47463000000	2380200000	1191400000	1649000000	2123700000	2566900000	2923600000	2664500000	2038900000	870460000	1816400000	692300000	1460100000	669850000	1100700000	4081800000	1797300000	1060900000	2887100000	2083500000	1166200000	2231300000	1797100000	2628900000	1230900000	1052300000	1297800000	2685700000	1567500000	2030700000	2655200000	3011900000	2745000000	2686600000	2569800000	2707100000	2556500000	2456400000	1838100000	2067500000	1650000000	3746200000	2721800000	1743000000
SFPQ	XP_020951556.1;XP_020951557.1	XP_020951556.1;XP_020951557.1	XP_020951556.1 splicing factor, proline- and glutamine-rich isoform X1 GN=SFPQ [Sus scrofa];XP_020951557.1 splicing factor, proline- and glutamine-rich isoform X2 GN=SFPQ [Sus scrofa]	23	23	47419000000	2407200000	2278200000	3104600000	2174400000	1552600000	2813400000	2592800000	1668300000	656260000	1260000000	552080000	1701400000	584970000	1479300000	3372700000	1769200000	1811000000	2185900000	2438100000	1163600000	1910000000	1696000000	1620100000	1435200000	1378800000	1812800000	2496100000	2625000000	3157800000	2376700000	2084000000	2440300000	2473800000	2396700000	2134000000	2178400000	2415000000	2289800000	2026300000	2453400000	2696800000	2200200000	2400300000
TPM4	XP_005661255.1	XP_005661255.1	XP_005661255.1 tropomyosin alpha-4 chain isoform X1 GN=TPM4 [Sus scrofa]	7	15	47324000000	1705200000	1435200000	1717700000	1706100000	1956000000	2451800000	2103300000	2012300000	1253600000	1460500000	872250000	1451000000	845820000	1180300000	3607200000	2161200000	1651400000	2347000000	2280000000	1146200000	2610200000	1938500000	2511700000	1832300000	1393500000	1693900000	1830800000	1609900000	1755900000	1985600000	2373500000	2421600000	2226200000	2628700000	3090000000	2575100000	2313900000	1882200000	2072000000	1706800000	3367500000	3144200000	2105700000
POSTN	NP_001193276.1;CON__Q2KJC7	NP_001193276.1;CON__Q2KJC7	NP_001193276.1 periostin isoform 1 precursor GN=POSTN [Sus scrofa];	0	41	47266000000	1665300000	1924800000	3325600000	1861800000	2106300000	3819400000	2505700000	1424900000	519540000	1195400000	464350000	1322700000	387840000	1584000000	3788100000	1885900000	796610000	2799200000	4860000000	579730000	1776300000	781110000	2276400000	1364800000	1465300000	784670000	2059100000	2485200000	3539600000	2409000000	2584100000	3432700000	2522300000	2119900000	1424900000	1896500000	1635500000	1628500000	1226500000	2334200000	3442000000	2619800000	1339400000
EIF4A1	NP_001093666.1;XP_020921673.1	NP_001093666.1;XP_020921673.1	NP_001093666.1 eukaryotic initiation factor 4A-I GN=EIF4A1 [Sus scrofa];XP_020921673.1 eukaryotic initiation factor 4A-I isoform X1 GN=EIF4A1 [Sus scrofa]	17	30	46634000000	2254800000	2103200000	2617300000	1865100000	1542300000	2413500000	2035200000	1934500000	943340000	1714400000	684970000	1556000000	731190000	1410000000	3115700000	1816800000	1413200000	1900000000	2033000000	1056500000	2354800000	2154400000	1804800000	1400300000	1620900000	2157500000	2585600000	2469500000	2725600000	2285400000	2008000000	2155800000	2118100000	2698200000	2464800000	2550900000	2403700000	1989400000	2191300000	2167800000	2754500000	2597600000	2144400000
EZR	XP_013847913.2	XP_013847913.2	XP_013847913.2 ezrin GN=EZR [Sus scrofa]	28	31	46501000000	2642000000	2205100000	2051700000	2089200000	1882200000	2651500000	2616700000	1853900000	807130000	1587500000	852230000	2138600000	643520000	1813200000	2695000000	1298000000	1506300000	1808900000	1701700000	694660000	2158600000	2435100000	1405800000	1553400000	1576300000	1832800000	2262700000	2778400000	2328800000	2455700000	2449100000	2495500000	2901300000	2341100000	2452800000	2519100000	2489700000	2654500000	2022500000	2219400000	2430700000	2055400000	2414400000
ACO2	NP_999119.1	NP_999119.1	NP_999119.1 aconitate hydratase, mitochondrial precursor GN=ACO2 [Sus scrofa]	36	36	46462000000	2186400000	2099700000	2154800000	2273800000	1635800000	2330000000	2310900000	1618900000	884890000	1748900000	812690000	1713100000	813350000	1610500000	2884800000	1242500000	1978800000	1960000000	2271000000	712430000	2239000000	1919700000	1748200000	1812800000	1177700000	2321800000	2490200000	2240700000	2403200000	2460900000	2143800000	2315300000	2457300000	2312400000	2579500000	2317300000	2860200000	2278300000	2640000000	2292400000	2611000000	2001900000	2512100000
FLNC	XP_003134748.1;XP_003134747.1;XP_020934610.1;XP_005657826.1;XP_020934609.1;XP_020934608.1	XP_003134748.1;XP_003134747.1;XP_020934610.1;XP_005657826.1;XP_020934609.1;XP_020934608.1	XP_003134748.1 filamin-C isoform X6 GN=FLNC [Sus scrofa];XP_003134747.1 filamin-C isoform X4 GN=FLNC [Sus scrofa];XP_020934610.1 filamin-C isoform X3 GN=FLNC [Sus scrofa];XP_005657826.1 filamin-C isoform X5 GN=FLNC [Sus scrofa];XP_020934609.1 filamin-C iso	103	103	46360000000	2114000000	2421900000	1723200000	1948000000	3489600000	2068700000	1828200000	3130300000	946070000	1121600000	450420000	1884000000	469910000	1561300000	3802700000	1388600000	1559700000	1662000000	1178800000	998020000	3314000000	1333600000	2735900000	1085900000	830710000	1313300000	2323800000	2626500000	2030100000	2224700000	3644300000	2074600000	1891400000	3652700000	2957600000	1862000000	1800400000	2189500000	1764500000	2197700000	3024100000	2141600000	2358500000
DCN	NP_999085.1	NP_999085.1	NP_999085.1 decorin precursor GN=DCN [Sus scrofa]	13	13	45857000000	1677900000	1180500000	3725000000	3483900000	2245400000	2095000000	2359500000	826930000	579000000	906870000	529660000	1188300000	950380000	3919400000	1060900000	2810700000	985890000	4959000000	2620600000	632650000	1108600000	635800000	2572500000	1606000000	758230000	438380000	2426200000	1494900000	3595400000	3479700000	3349600000	2002000000	2412000000	1723300000	1471200000	1829000000	1559400000	1559400000	2116500000	4631200000	1027600000	4607400000	1475100000
HNRNPF	XP_020929556.1;XP_020929555.1;XP_020929554.1;XP_020929553.1;XP_020929551.1;XP_013838718.1;XP_013838717.1;XP_005671058.1;XP_005671057.1;XP_005671056.1;XP_001929089.1	XP_020929556.1;XP_020929555.1;XP_020929554.1;XP_020929553.1;XP_020929551.1;XP_013838718.1;XP_013838717.1;XP_005671058.1;XP_005671057.1;XP_005671056.1;XP_001929089.1	XP_020929556.1 heterogeneous nuclear ribonucleoprotein F GN=HNRNPF [Sus scrofa];XP_020929555.1 heterogeneous nuclear ribonucleoprotein F GN=HNRNPF [Sus scrofa];XP_020929554.1 heterogeneous nuclear ribonucleoprotein F GN=HNRNPF [Sus scrofa];XP_020929553.1 h	20	22	45539000000	2338200000	1987600000	2428700000	1728900000	1551100000	2636300000	2324400000	1961000000	902440000	1605500000	614880000	1890900000	672880000	1453100000	2735400000	1477000000	1639700000	1808600000	1936900000	999340000	1939100000	2292200000	1687500000	1650700000	1451700000	1824900000	2517200000	2388500000	2660800000	2124000000	1941600000	2413300000	2357700000	2551100000	2317000000	2384900000	1944700000	2231200000	1922400000	2077700000	2538600000	2275400000	2472100000
TXN	NP_999478.1;XP_020938922.1	NP_999478.1;XP_020938922.1	NP_999478.1 thioredoxin GN=TXN [Sus scrofa];XP_020938922.1 thioredoxin isoform X1 GN=TXN [Sus scrofa]	8	8	44478000000	1982300000	1897900000	2534300000	1477100000	2061900000	2505500000	2171400000	1835400000	1000700000	1589600000	653540000	1858100000	750710000	1781000000	1997200000	1352400000	1601200000	1794200000	2184600000	1055300000	1765400000	1833700000	1652500000	1449000000	1589600000	2103400000	2251400000	2214500000	2360600000	1823100000	2340500000	2439100000	2285100000	2415700000	3159200000	2645200000	2466900000	2212800000	2754600000	2365900000	1827600000	2052700000	2106000000
TALDO1	NP_001231864.1	NP_001231864.1	NP_001231864.1 transaldolase GN=TALDO1 [Sus scrofa]	13	13	44269000000	2653300000	2091800000	2081500000	1721900000	1660300000	2748900000	2209800000	1735300000	787100000	1649700000	651790000	1838500000	569790000	1548700000	2158100000	1363000000	1712800000	1694400000	2123000000	845170000	1794600000	2099900000	1553900000	1857300000	1521100000	1597300000	2854100000	2543500000	2350700000	2205100000	2155600000	2573300000	2254600000	2231800000	2121700000	2362800000	1841400000	2396600000	1918600000	2026700000	1845500000	1938200000	2526500000
TJP1	XP_003480471.3;XP_020954525.1;XP_020954504.1;XP_020954519.1;XP_020954495.1;XP_020954492.1;XP_020954486.1;XP_020954550.1;XP_020954545.1;XP_020954537.1;XP_020954555.1;XP_020954542.1;XP_020954515.1;XP_020954507.1;XP_020954502.1	XP_003480471.3;XP_020954525.1;XP_020954504.1;XP_020954519.1;XP_020954495.1;XP_020954492.1;XP_020954486.1;XP_020954550.1;XP_020954545.1;XP_020954537.1;XP_020954555.1;XP_020954542.1;XP_020954515.1;XP_020954507.1;XP_020954502.1	XP_003480471.3 tight junction protein ZO-1 isoform X10 GN=TJP1 [Sus scrofa];XP_020954525.1 tight junction protein ZO-1 isoform X9 GN=TJP1 [Sus scrofa];XP_020954504.1 tight junction protein ZO-1 isoform X5 GN=TJP1 [Sus scrofa];XP_020954519.1 tight junction	70	70	44126000000	2484800000	2400000000	3373100000	2748700000	2109300000	2330800000	2088200000	1934100000	564420000	1144400000	640790000	1794200000	480660000	1759900000	1607000000	868150000	1981500000	2646900000	2473400000	609170000	1453400000	1255700000	1043400000	1382900000	600160000	2350900000	2132300000	2420700000	2605200000	2428200000	1952300000	2492000000	2636600000	2111400000	2313800000	2163000000	2612200000	2041000000	2167500000	1875900000	1992600000	1896700000	2329800000
RPSA	NP_001032223.1;XP_020933343.1	NP_001032223.1	NP_001032223.1 40S ribosomal protein SA GN=RPSA [Sus scrofa]	15	15	44122000000	2226800000	1719600000	2410100000	1724700000	1503200000	2387300000	2012900000	1915100000	966480000	1596200000	681910000	1533600000	641730000	1590100000	2992600000	1646400000	1344500000	1949200000	2068500000	1024600000	2114300000	1925000000	1643700000	1442200000	1323000000	1738700000	2447300000	2181000000	2569600000	2105600000	1832300000	2311500000	2131600000	2649300000	2593300000	2447400000	2359300000	1935200000	2147900000	2027900000	2652800000	2408700000	2006600000
MAP4	XP_005669550.1;XP_020926251.1;XP_020926252.1;XP_020926242.1;XP_005669546.1;XP_013837068.1;XP_020926255.1;XP_020926249.1;XP_020926246.1;XP_020926241.1;XP_020926243.1;XP_020926253.1;XP_020926248.1;XP_020926245.1;XP_020926261.1;XP_020926238.1;XP_013837073.1;XP_020926229.1;XP_020926244.1;XP_020926231.1;XP_020926230.1;XP_020926228.1;XP_020926227.1;XP_020926226.1;XP_020926235.1;XP_020926247.1;XP_020926…	XP_005669550.1;XP_020926251.1;XP_020926252.1;XP_020926242.1;XP_005669546.1;XP_013837068.1;XP_020926255.1;XP_020926249.1;XP_020926246.1;XP_020926241.1;XP_020926243.1;XP_020926253.1;XP_020926248.1;XP_020926245.1;XP_020926261.1;XP_020926238.1;XP_013837073.1;XP_020926229.1;XP_020926244.1;XP_020926231.1;XP_020926230.1;XP_020926228.1;XP_020926227.1;XP_020926226.1;XP_020926235.1;XP_020926247.1;XP_020926…	XP_005669550.1 microtubule-associated protein 4 isoform X18 GN=MAP4 [Sus scrofa];XP_020926251.1 microtubule-associated protein 4 isoform X26 GN=MAP4 [Sus scrofa];XP_020926252.1 microtubule-associated protein 4 isoform X26 GN=MAP4 [Sus scrofa];XP_020926242.	36	36	43875000000	1403200000	1807700000	2486500000	1959100000	1857600000	2390500000	2157700000	1479800000	718980000	1302700000	679780000	1613100000	669830000	1388600000	3484900000	1761400000	1722700000	2063800000	1682200000	1034600000	2294500000	1954900000	1700300000	1039900000	1038100000	2182700000	1593500000	2196500000	2440400000	2157400000	2138700000	2320600000	2286800000	1951600000	2195000000	2100100000	2534900000	2053700000	1974900000	1806400000	2854300000	2410500000	2338800000
S100A10	XP_005663495.1;XP_005663494.1;XP_003355214.1;NP_001278853.1	XP_005663495.1;XP_005663494.1;XP_003355214.1;NP_001278853.1	XP_005663495.1 protein S100-A10 isoform X1 GN=S100A10 [Sus scrofa];XP_005663494.1 protein S100-A10 isoform X1 GN=S100A10 [Sus scrofa];XP_003355214.1 protein S100-A10 isoform X1 GN=S100A10 [Sus scrofa];NP_001278853.1 protein S100-A10 GN=S100A10 [Sus scrofa]	5	5	43715000000	1293200000	1821700000	2339400000	1404700000	1799200000	2290300000	2330300000	1957300000	859660000	1290600000	702710000	2025200000	540590000	1387100000	2264400000	1557400000	1359800000	3007600000	1386800000	848570000	1838200000	2113500000	2629800000	1901600000	1054900000	1710700000	1654100000	2451800000	2572900000	1931600000	2337800000	2100700000	2183600000	2477600000	2303000000	1724600000	2161600000	2415200000	1485400000	1874100000	2300400000	2169700000	2073900000
GNAI2	XP_020924205.1;XP_005669625.1;NP_001116588.1;XP_005669626.1	XP_020924205.1;XP_005669625.1;NP_001116588.1;XP_005669626.1	XP_020924205.1 guanine nucleotide-binding protein G(i) subunit alpha-2 isoform X1 GN=GNAI2 [Sus scrofa];XP_005669625.1 guanine nucleotide-binding protein G(i) subunit alpha-2 isoform X1 GN=GNAI2 [Sus scrofa];NP_001116588.1 guanine nucleotide-binding protei	15	23	43055000000	1518900000	2165700000	1817200000	1496800000	1843700000	2416500000	2703400000	1466100000	782180000	1689100000	816020000	2025600000	824000000	1582900000	2081200000	1176000000	1781100000	1918700000	1852200000	611090000	2367900000	1899000000	1694000000	988240000	1321500000	2215800000	1933900000	2627000000	1888400000	1775000000	2123400000	2210400000	2862200000	1917600000	2102600000	2479500000	2533800000	2422500000	2463400000	2082600000	1907200000	1639000000	2629300000
PPIB	XP_020949539.1	XP_020949539.1	XP_020949539.1 peptidyl-prolyl cis-trans isomerase B GN=PPIB [Sus scrofa]	17	18	42616000000	1503200000	1817500000	2306700000	1622600000	1760400000	2230300000	1842800000	1309900000	848580000	1298100000	885510000	1399500000	871350000	1294700000	2837500000	1927600000	1373200000	2096700000	2112600000	1159700000	1661000000	1665200000	1818600000	1585400000	1502900000	1884900000	2096900000	2274500000	2648300000	2061500000	1908600000	2212700000	1925800000	1876800000	2504400000	1975700000	2695900000	1944900000	2396500000	1907100000	2648000000	2902100000	2017500000
YWHAG	XP_005662019.1	XP_005662019.1	XP_005662019.1 14-3-3 protein gamma GN=YWHAG [Sus scrofa]	8	8	42533000000	2361000000	1878600000	2063300000	2019500000	1998400000	2506100000	2506300000	1453100000	614210000	1416000000	554870000	1854800000	548400000	1656500000	2646600000	1615200000	1748100000	2069900000	1877300000	926270000	1824400000	1382300000	1198900000	1457200000	988940000	1367000000	2593900000	2714100000	2318700000	2526100000	2375300000	2423800000	2630600000	2170700000	1165100000	2283500000	1743000000	2496300000	1696000000	2274000000	2272500000	2240300000	2746500000
RACK1	NP_999497.1	NP_999497.1	NP_999497.1 receptor of activated protein C kinase 1 GN=RACK1 [Sus scrofa]	20	20	42522000000	2220200000	1729800000	1904900000	1581500000	1525500000	2446000000	1968700000	1777300000	879740000	1479600000	684690000	1475400000	659970000	1263400000	3042800000	1480600000	1451500000	1867300000	2084800000	810510000	1847400000	2158700000	1689200000	1491600000	1161500000	1839000000	2673800000	2148800000	2101700000	2042400000	1918400000	2378700000	2100500000	2533400000	2446700000	2300300000	2238800000	1900200000	2166700000	1805700000	2539900000	2296800000	2166000000
PLG	NP_001038055.1;CON__P06868	NP_001038055.1	NP_001038055.1 plasminogen precursor GN=PLG [Sus scrofa]	49	49	41823000000	2200600000	1058500000	984590000	2520300000	2172500000	1293900000	1549200000	2772700000	783080000	1792300000	460730000	2171000000	1565100000	5206300000	1093900000	1616200000	2097700000	1661600000	1807200000	768300000	1067300000	874060000	1449500000	961410000	1049100000	846050000	2492700000	1459700000	1251100000	2987000000	2732400000	1206200000	1661800000	3378100000	2193800000	2493000000	1631800000	2614900000	4412800000	6463100000	1069200000	2180200000	3070800000
EPB41L2	XP_020943702.1;XP_020943794.1;XP_020943720.1;XP_020943833.1;XP_020943737.1;XP_020943706.1;XP_020943802.1;XP_020943712.1;XP_020943755.1;XP_020943743.1;XP_020943752.1;XP_020943759.1;XP_020943765.1;XP_020943768.1;XP_020943726.1;XP_020943852.1;XP_020943789.1;XP_020943841.1;XP_020943775.1;XP_020943784.1;XP_020943813.1;XP_020943893.1;XP_020943903.1;XP_020943914.1;XP_020943862.1;XP_020943876.1;XP_020943…	XP_020943702.1;XP_020943794.1;XP_020943720.1;XP_020943833.1;XP_020943737.1;XP_020943706.1;XP_020943802.1;XP_020943712.1;XP_020943755.1;XP_020943743.1;XP_020943752.1;XP_020943759.1;XP_020943765.1;XP_020943768.1;XP_020943726.1;XP_020943852.1;XP_020943789.1;XP_020943841.1;XP_020943775.1;XP_020943784.1;XP_020943813.1;XP_020943893.1;XP_020943903.1;XP_020943914.1;XP_020943862.1;XP_020943876.1;XP_020943…	XP_020943702.1 band 4.1-like protein 2 isoform X1 GN=EPB41L2 [Sus scrofa];XP_020943794.1 band 4.1-like protein 2 isoform X5 GN=EPB41L2 [Sus scrofa];XP_020943720.1 band 4.1-like protein 2 isoform X1 GN=EPB41L2 [Sus scrofa];XP_020943833.1 band 4.1-like prote	3	51	41489000000	1859900000	1457500000	2370700000	1968600000	1814800000	2775700000	2613700000	1606400000	715310000	1502100000	660790000	1531400000	852890000	1683300000	2356700000	1343900000	1211500000	1717400000	1595800000	602330000	1794100000	1603300000	1726200000	1403400000	963610000	1757700000	2173900000	1805300000	2298100000	2500500000	2108500000	2530200000	2439400000	1872600000	2028700000	1977900000	2126600000	1937600000	2427700000	2030300000	2166900000	1878600000	2030200000
ZYX	XP_005657776.1;XP_003134640.2	XP_005657776.1;XP_003134640.2	XP_005657776.1 zyxin GN=ZYX [Sus scrofa];XP_003134640.2 zyxin GN=ZYX [Sus scrofa]	26	26	41295000000	2216900000	1820800000	1948800000	2204000000	1697200000	2432400000	2086200000	1238700000	619350000	1047700000	564870000	1490400000	539430000	1314800000	3191600000	1725500000	1520100000	1872300000	2096500000	758710000	1803500000	1486600000	1877300000	1289200000	715870000	1736000000	2125000000	2044000000	2012300000	2380500000	1824600000	2122700000	1911500000	1866000000	2221300000	1759900000	2057200000	1815400000	1765300000	1763300000	2316500000	2103200000	2146500000
S100A6	XP_020944411.1;XP_020944412.1;NP_001038022.1	XP_020944411.1;XP_020944412.1;NP_001038022.1	XP_020944411.1 protein S100-A6 isoform X1 GN=S100A6 [Sus scrofa];XP_020944412.1 protein S100-A6 isoform X1 GN=S100A6 [Sus scrofa];NP_001038022.1 protein S100-A6 GN=S100A6 [Sus scrofa]	4	4	41095000000	2568300000	3529700000	2843500000	2876400000	3042800000	3252700000	2445500000	1121800000	147390000	490170000	207220000	850990000	169660000	943740000	2418500000	899710000	1720900000	4101500000	2500800000	1020500000	1327600000	302020000	1301100000	386500000	188780000	437200000	2406900000	4238800000	2906300000	3401800000	3773700000	3294100000	2167000000	1033800000	99246000	636570000	325750000	843860000	331230000	1326900000	1953900000	1141800000	2313200000
ARPC2	NP_001177168.1	NP_001177168.1	NP_001177168.1 actin-related protein 2/3 complex subunit 2 GN=ARPC2 [Sus scrofa]	25	25	40892000000	2136800000	2243300000	2189100000	1803800000	1541500000	2549000000	2081100000	1616000000	810160000	1869200000	743930000	1415200000	682440000	1288100000	2157100000	1266100000	1372700000	1656500000	1931100000	834620000	1692400000	1716400000	1287000000	1186600000	1373300000	1448300000	2439000000	2700400000	2566600000	2250800000	2029000000	2225800000	2263200000	2016800000	1852500000	2465000000	1864900000	2086600000	2101100000	2105200000	1916300000	1909400000	2118600000
NID2	XP_020957573.1;XP_020957580.1;XP_020957589.1	XP_020957573.1;XP_020957580.1;XP_020957589.1	XP_020957573.1 nidogen-2 isoform X1 GN=NID2 [Sus scrofa];XP_020957580.1 nidogen-2 isoform X2 GN=NID2 [Sus scrofa];XP_020957589.1 nidogen-2 isoform X3 GN=NID2 [Sus scrofa]	54	55	40699000000	1871500000	890140000	1954600000	1934900000	1780200000	2452500000	2105300000	1459100000	531450000	1375100000	524860000	1083100000	450900000	1154100000	3499300000	1913400000	879900000	2711600000	2903900000	776420000	1417600000	1206700000	2187300000	1380500000	832820000	1421700000	2008500000	1279100000	2249600000	2460200000	2319700000	2203100000	2004400000	1693100000	1884800000	2006800000	2126500000	1494200000	1672600000	1677700000	2846200000	2667100000	1514900000
C4A	NP_001116561.1;CON__ENSEMBL:ENSBTAP00000007350	NP_001116561.1	NP_001116561.1 complement C4-A precursor GN=C4A [Sus scrofa]	71	75	40556000000	1519700000	1204500000	1169100000	2294800000	2274600000	1058700000	1048500000	2100500000	681460000	1899800000	284330000	2477000000	1806900000	5374000000	635530000	1322000000	2011900000	1784000000	1826200000	1385700000	996990000	798650000	1593800000	892500000	1283900000	830770000	1900400000	1622700000	1502900000	2773500000	2717500000	1064900000	1205100000	2749400000	2104500000	2695800000	1363900000	2913200000	4831900000	6153100000	920390000	2118300000	2895600000
BLVRB	XP_003355965.1	XP_003355965.1	XP_003355965.1 flavin reductase (NADPH) GN=BLVRB [Sus scrofa]	12	12	40112000000	2334400000	1476700000	1865700000	1450900000	1603300000	1727200000	1942400000	1564300000	683070000	1351600000	569930000	2047800000	1198800000	2470200000	1509200000	1144000000	2806900000	1030700000	1476800000	1968900000	1332800000	1368600000	743380000	837440000	2145000000	1461900000	2237800000	1533800000	1611400000	1728800000	1976400000	1512100000	1956600000	1951600000	1823700000	2054200000	1860900000	2271100000	3485800000	3113900000	904900000	1393100000	2742600000
COL12A1	XP_013848274.2;XP_020948019.1;XP_013848273.2;XP_020948033.1;XP_020948029.1;XP_020948028.1	XP_013848274.2;XP_020948019.1;XP_013848273.2;XP_020948033.1;XP_020948029.1;XP_020948028.1	XP_013848274.2 collagen alpha-1(XII) chain isoform X2 GN=COL12A1 [Sus scrofa];XP_020948019.1 collagen alpha-1(XII) chain isoform X1 GN=COL12A1 [Sus scrofa];XP_013848273.2 collagen alpha-1(XII) chain isoform X1 GN=COL12A1 [Sus scrofa];XP_020948033.1 collage	84	84	39967000000	1481100000	2229800000	2210700000	1885700000	2038900000	2456500000	1916600000	1479500000	705890000	1012300000	722960000	1247400000	554120000	914910000	3388100000	1211500000	1467600000	2432900000	1518600000	843260000	2044800000	952730000	2361500000	1035200000	682410000	1172300000	1719900000	2564000000	2136100000	2241500000	2428600000	2241400000	2005000000	2083500000	2156500000	1604600000	2381000000	1745900000	1830100000	1529100000	2788800000	1958100000	2061600000
CAPZB	NP_001106915.1;XP_020948867.1	NP_001106915.1;XP_020948867.1	NP_001106915.1 F-actin-capping protein subunit beta GN=CAPZB [Sus scrofa];XP_020948867.1 F-actin-capping protein subunit beta isoform X3 GN=CAPZB [Sus scrofa]	2	19	39834000000	2177400000	1597400000	1924000000	1573400000	1701600000	2271600000	2148500000	1623500000	726760000	1547300000	553720000	1554500000	693830000	1346800000	2095700000	1043400000	1413100000	1615400000	2054000000	685110000	2036100000	1809300000	1435600000	1345700000	1059700000	1800800000	2601700000	1942000000	1912500000	2008900000	1963300000	2339800000	2381600000	2150800000	2336700000	2416500000	2119200000	2082400000	2198400000	1924000000	2133600000	1493300000	2076900000
PDIA6	NP_001182048.1	NP_001182048.1	NP_001182048.1 protein disulfide-isomerase A6 precursor GN=PDIA6 [Sus scrofa]	19	19	39647000000	1982600000	1862100000	2460700000	1669500000	1267700000	1952200000	1657200000	1536700000	767910000	1481800000	506160000	1385100000	653630000	1390700000	2581600000	1519400000	1283800000	1954700000	1846400000	1003500000	1669800000	1737300000	1574500000	1110700000	1245100000	1546500000	2292300000	2334000000	2542500000	2125200000	1711000000	1880600000	1833500000	2085800000	2076600000	2165000000	1758400000	1813700000	1913000000	2069300000	2350500000	2315800000	1977700000
CTSD	NP_001032810.1	NP_001032810.1	NP_001032810.1 cathepsin D precursor GN=CTSD [Sus scrofa]	18	18	39308000000	2039800000	2641100000	2048600000	1219200000	1488400000	2012300000	1237700000	1413200000	841000000	1440500000	592820000	1717000000	620900000	1103300000	1765600000	945510000	1638000000	1619700000	1730400000	799880000	1766200000	1816300000	1737100000	1703000000	1127400000	2242800000	2392200000	3237700000	2473600000	1600400000	1785600000	1947300000	1479800000	1836000000	2308100000	2142800000	1989000000	1957100000	1778900000	1411000000	1670400000	1482200000	2615300000
ARHGDIB	NP_001231169.1	NP_001231169.1	NP_001231169.1 rho GDP-dissociation inhibitor 2 GN=ARHGDIB [Sus scrofa]	9	9	39163000000	2597500000	1716700000	1762700000	1712700000	1555000000	2305000000	2183300000	1354000000	774070000	1724400000	576900000	1783200000	788020000	1820800000	1651900000	1334300000	1508700000	1355300000	1859800000	466580000	1550900000	1784400000	1091800000	1108900000	1269700000	1526000000	2779400000	2384500000	2007600000	2168900000	1766100000	2203000000	2228100000	2092100000	2003300000	2447500000	1989300000	2063100000	2392200000	2216000000	1807900000	1943000000	2630500000
NME2	NP_001038075.1	NP_001038075.1	NP_001038075.1 nucleoside diphosphate kinase B GN=NME2 [Sus scrofa]	5	8	38780000000	1959900000	1367800000	2316600000	1494600000	1561000000	2111600000	2115400000	1617000000	696990000	1515700000	802290000	1530700000	485490000	1435000000	1899300000	1332100000	1155200000	1572900000	1919600000	805650000	1732100000	1453800000	1373300000	1518300000	1455300000	1551800000	2274000000	1908000000	2553200000	1864900000	2100600000	2101800000	2276600000	2186600000	1765300000	2253300000	2058600000	2032600000	1533300000	2329000000	1759400000	1981200000	1725800000
SEPTIN7	XP_005657832.1;XP_003360219.1;XP_020934288.1;XP_013846294.1;XP_003134838.1;XP_020934289.1;XP_013846295.1	XP_005657832.1;XP_003360219.1;XP_020934288.1;XP_013846294.1;XP_003134838.1;XP_020934289.1;XP_013846295.1	XP_005657832.1 septin-7 isoform X5 GN=SEPTIN7 [Sus scrofa];XP_003360219.1 septin-7 isoform X4 GN=SEPTIN7 [Sus scrofa];XP_020934288.1 septin-7 isoform X2 GN=SEPTIN7 [Sus scrofa];XP_013846294.1 septin-7 isoform X3 GN=SEPTIN7 [Sus scrofa];XP_003134838.1 septi	19	20	38443000000	1767300000	1445700000	1891100000	1601600000	1683800000	2344100000	1923600000	1366200000	592120000	1081700000	613870000	1302300000	577100000	1459200000	2578900000	1315900000	1042700000	1909300000	1982000000	809800000	1960200000	1542100000	1644300000	1417200000	1024200000	1566600000	1869100000	1644300000	1790400000	1950200000	1815200000	2104300000	1941700000	1712000000	1547100000	1717500000	1792300000	1628700000	1543300000	1903800000	2226000000	1851600000	1572100000
MIF	NP_001070681.1	NP_001070681.1	NP_001070681.1 macrophage migration inhibitory factor GN=MIF [Sus scrofa]	5	5	38336000000	1874600000	1758200000	2082300000	1671600000	1521900000	2151100000	2147500000	1472700000	591970000	1676800000	486690000	1889100000	510990000	1457600000	1986400000	1149000000	1224300000	1597300000	2229800000	816040000	1695600000	1590500000	1290600000	1254900000	1151900000	1056600000	2228200000	2347700000	1939000000	2203400000	1970200000	2255800000	2622600000	1977100000	1256900000	2724100000	907440000	2435100000	1181400000	1804100000	1899800000	1466300000	1848200000
MDH1	NP_999039.1	NP_999039.1	NP_999039.1 malate dehydrogenase, cytoplasmic GN=MDH1 [Sus scrofa]	13	13	38274000000	2062700000	1611600000	2160100000	1511700000	1606400000	2228400000	2075800000	1379300000	633690000	1278400000	601880000	1449200000	630830000	1728800000	2318600000	1277300000	1385300000	1620200000	1571600000	831470000	1599100000	1439700000	1538500000	1231400000	886000000	1616400000	2199700000	2046800000	2360400000	2259000000	1918800000	2223200000	2291300000	1867300000	1682400000	1890900000	1760900000	1881400000	1889400000	2300500000	1989800000	1756400000	2002300000
CLIC1	XP_020954121.1;XP_020954120.1	XP_020954121.1;XP_020954120.1	XP_020954121.1 chloride intracellular channel protein 1 GN=CLIC1 [Sus scrofa];XP_020954120.1 chloride intracellular channel protein 1 GN=CLIC1 [Sus scrofa]	17	17	38034000000	1848900000	1834000000	1824900000	1726600000	1442700000	2327000000	2153500000	1682800000	919860000	1620800000	727720000	1380600000	648250000	1275600000	2020700000	1163600000	1532800000	1442400000	1757700000	618590000	1532500000	1638900000	1276600000	1229000000	856840000	1551300000	2088600000	2210100000	1865900000	1967800000	1802100000	2150500000	2165500000	2443000000	2332300000	2470000000	2273700000	1868600000	2277500000	1890200000	1714700000	1582400000	2225800000
RAP1B	XP_013853164.1;XP_005664026.1	XP_013853164.1;XP_005664026.1	XP_013853164.1 ras-related protein Rap-1b GN=RAP1B [Sus scrofa];XP_005664026.1 ras-related protein Rap-1b GN=RAP1B [Sus scrofa]	6	15	37868000000	1474900000	1850100000	1893200000	1437800000	1653100000	1996800000	2226200000	1222400000	537520000	1162600000	663950000	2086700000	654170000	1345700000	1722800000	1213200000	1489800000	1766300000	1766400000	736080000	1981100000	1605500000	1705000000	1018700000	1072500000	1585100000	1572400000	2274000000	1999600000	1839300000	2016200000	1958300000	2290700000	1586900000	1656500000	1953300000	2382900000	2572900000	1994400000	1906700000	1593600000	1733600000	2248200000
S100A9	NP_001171377.1;XP_020944112.1;XP_013852489.2	NP_001171377.1;XP_020944112.1;XP_013852489.2	NP_001171377.1 protein S100-A9 GN=S100A9 [Sus scrofa];XP_020944112.1 S100 calcium binding protein A9 isoform X2 GN=S100A9 [Sus scrofa];XP_013852489.2 S100 calcium binding protein A9 isoform X1 GN=S100A9 [Sus scrofa]	8	8	37631000000	2992600000	2941500000	999880000	1150300000	1385600000	947130000	890200000	2611900000	1209600000	1687400000	561900000	1347300000	359110000	610170000	416960000	2281000000	3427900000	1712500000	1208500000	212500000	1018200000	3054700000	1381000000	1111100000	1443000000	668830000	3030400000	3538200000	1031800000	1238000000	1553700000	881030000	909300000	3446500000	3788500000	2754500000	1732700000	1697200000	1228100000	856360000	347240000	3283400000	4534100000
CA1	XP_001924218.1	XP_001924218.1	XP_001924218.1 carbonic anhydrase 1 GN=CA1 [Sus scrofa]	14	14	37627000000	2464100000	1244400000	1760300000	1447700000	1467800000	829530000	2294200000	2077500000	840430000	1375500000	555260000	1697900000	692520000	3858900000	470260000	1890900000	1391000000	383810000	1519000000	2300500000	731590000	2068600000	208790000	271040000	2522900000	1263000000	3008100000	1526900000	1915100000	1831700000	1790300000	813790000	2441200000	2818800000	2345800000	2103300000	1860500000	2284700000	2292400000	4925600000	503920000	2588900000	2323200000
HNRNPA1	XP_005663912.1;NP_001070686.1;XP_005663911.1;XP_020922747.1	XP_005663912.1;NP_001070686.1;XP_005663911.1	XP_005663912.1 heterogeneous nuclear ribonucleoprotein A1 isoform X2 GN=HNRNPA1 [Sus scrofa];NP_001070686.1 heterogeneous nuclear ribonucleoprotein A1 GN=HNRNPA1 [Sus scrofa];XP_005663911.1 heterogeneous nuclear ribonucleoprotein A1 isoform X1 GN=HNRNPA1 [	17	17	37296000000	1633700000	1620000000	2004400000	1166700000	1572400000	2127500000	1960700000	1585700000	552540000	1273900000	498180000	1546500000	566750000	1488400000	2541000000	1274200000	1211800000	1631200000	1989100000	905170000	1610200000	1438100000	1554600000	991030000	908140000	1644200000	1750000000	1942300000	2060400000	1819200000	1673400000	2101900000	2001300000	2259200000	1795200000	1979700000	1572200000	1952100000	1501200000	2229900000	2300400000	1875400000	1902000000
ALDH9A1	XP_005663205.1;XP_020945146.1;XP_020933986.1	XP_005663205.1;XP_020945146.1	XP_005663205.1 4-trimethylaminobutyraldehyde dehydrogenase isoform X1 GN=ALDH9A1 [Sus scrofa];XP_020945146.1 4-trimethylaminobutyraldehyde dehydrogenase isoform X2 GN=ALDH9A1 [Sus scrofa]	28	28	37181000000	2338500000	1522300000	1864700000	1640300000	1999600000	2108300000	2162900000	1319900000	785150000	1615600000	644800000	1436100000	710450000	1224300000	1777800000	981080000	1327400000	1687400000	1814800000	551130000	1391800000	1363300000	1274700000	1407200000	999430000	1232200000	2333500000	1739600000	1833800000	1687300000	2030200000	2148200000	2425100000	2034900000	2307700000	2529000000	2205000000	1961300000	2160800000	1686300000	1494500000	1515700000	1864400000
ACTR2	NP_001127826.1;XP_005662565.1	NP_001127826.1;XP_005662565.1	NP_001127826.1 actin-related protein 2 GN=ACTR2 [Sus scrofa];XP_005662565.1 actin-related protein 2 isoform X1 GN=ACTR2 [Sus scrofa]	20	20	36965000000	2031900000	1798500000	1598100000	1811500000	1757600000	2020900000	1838200000	1183300000	690910000	1366800000	643970000	1571400000	574910000	1305200000	1982500000	1108900000	1262500000	1653800000	1864200000	650550000	1830300000	1499100000	1293100000	1132100000	1103300000	1391100000	2192600000	2281800000	1904700000	2075400000	1927200000	2014200000	1962100000	1752800000	1954000000	2098800000	2035500000	1932000000	1700400000	1756300000	1745400000	1665300000	1856100000
CYB5R3	XP_003126030.2	XP_003126030.2	XP_003126030.2 LOW QUALITY PROTEIN: NADH-cytochrome b5 reductase 3-like GN=LOC100524254 [Sus scrofa]	15	15	36934000000	1339000000	1822400000	1361000000	1303100000	1552300000	2079800000	2367600000	1393900000	747550000	1327900000	752380000	1720000000	622710000	1367900000	2125300000	938560000	1103200000	1477600000	1088900000	656770000	2453300000	1699700000	1641300000	956650000	1030500000	2005200000	1644600000	2300100000	1610800000	1715700000	1923300000	2013300000	2533100000	1921100000	1939300000	1878300000	2515900000	2058900000	2047200000	1995700000	2087900000	1411300000	1747700000
CSTB	NP_001090965.1	NP_001090965.1	NP_001090965.1 cystatin-B GN=CSTB [Sus scrofa]	6	6	36454000000	2219600000	1631600000	2057700000	1426000000	1443000000	2476300000	2066500000	1171700000	542780000	1459400000	436170000	1378300000	441750000	1038500000	1702900000	1136300000	1755500000	1369200000	1991700000	542770000	1412400000	1477700000	1225900000	1347000000	1191300000	1512500000	2602300000	2305100000	2191600000	1857400000	1865200000	2387600000	1788600000	1676100000	2037800000	2424600000	1321000000	1852900000	1465300000	1517200000	1533400000	1410100000	2243000000
SLC25A5	XP_001927475.1	XP_001927475.1	XP_001927475.1 ADP/ATP translocase 2 GN=SLC25A5 [Sus scrofa]	7	15	36385000000	1280200000	1673800000	1748400000	1007000000	1151700000	1789700000	1755500000	1170200000	664740000	1455200000	893910000	1828400000	658340000	1316100000	2037500000	1011900000	1222100000	1238300000	1412600000	1005000000	2288700000	1766100000	1503700000	852320000	1553400000	2099800000	1491400000	2197000000	1865500000	1224400000	1814200000	1855100000	1981200000	1570900000	1816700000	2161800000	2838100000	2390800000	2079300000	1726200000	1887400000	1475300000	1806800000
H2BC16	XP_020955505.1;XP_020955504.1;XP_020955500.1;XP_020955495.1;XP_020945586.1;XP_003356615.2;XP_001927974.2;XP_001927752.1;NP_001230585.1;XP_020955503.1;XP_013832959.2;XP_020954075.1;XP_020954074.1;XP_013846203.1	XP_020955505.1;XP_020955504.1;XP_020955500.1;XP_020955495.1;XP_020945586.1;XP_003356615.2;XP_001927974.2;XP_001927752.1;NP_001230585.1;XP_020955503.1;XP_013832959.2	XP_020955505.1 LOW QUALITY PROTEIN: histone H2B type 1-K GN=LOC100512420 [Sus scrofa];XP_020955504.1 histone H2B type 1-K GN=LOC110261672 [Sus scrofa];XP_020955500.1 histone H2B type 1 GN=LOC110261669 [Sus scrofa];XP_020955495.1 histone H2B type 1 GN=LOC11	2	2	36315000000	1062800000	1198100000	2086000000	1391900000	1479200000	3064700000	2458200000	624320000	557360000	1159800000	1103300000	1323300000	633800000	1250600000	3680600000	726020000	1138400000	837250000	1200600000	1196000000	2334100000	1144400000	1303600000	1172600000	770080000	1418100000	1097000000	1451500000	2307700000	1931600000	1177200000	3160200000	2704600000	804860000	1597700000	1736100000	4005700000	1643400000	2365800000	1852300000	3505800000	1337500000	1327600000
CFB	NP_001095294.1;CON__Q3KUS7	NP_001095294.1	NP_001095294.1 complement factor B precursor GN=CFB [Sus scrofa]	1	34	36307000000	1494400000	1037400000	1451500000	2019700000	2094100000	1228700000	1346800000	1935500000	679740000	1509800000	371920000	1919800000	1439500000	4225100000	787550000	1418000000	1444400000	1337500000	995670000	1055100000	1491300000	1224700000	1233000000	794460000	676990000	1094100000	1731900000	1227100000	1609700000	2412800000	2638400000	1138400000	1322600000	2365100000	1750400000	2079800000	1306000000	2442200000	4345500000	5244900000	946120000	2120200000	2229300000
SLA-1	XP_020954096.1;XP_013833010.1	XP_020954096.1;XP_013833010.1	XP_020954096.1 MHC class I antigen 1 isoform X1 GN=SLA-1 [Sus scrofa];XP_013833010.1 MHC class I antigen 1 isoform X2 GN=SLA-1 [Sus scrofa]	8	17	36260000000	1817600000	2115500000	868340000	960270000	1215800000	2055600000	2072600000	1549900000	784520000	994820000	685540000	1932800000	711140000	1303000000	1898000000	1334000000	929020000	741820000	1409200000	838710000	2185500000	2386800000	991600000	536530000	1354000000	2587300000	1696400000	2327100000	910530000	1368300000	1731700000	1806800000	2411200000	1693700000	1919600000	1641000000	2578000000	2386500000	2008100000	1743300000	1602500000	1781900000	1417000000
HNRNPL	XP_020950008.1	XP_020950008.1	XP_020950008.1 LOW QUALITY PROTEIN: heterogeneous nuclear ribonucleoprotein L GN=HNRNPL [Sus scrofa]	22	22	35886000000	1920500000	1527200000	1947600000	1800700000	1328900000	2096400000	1821500000	1268500000	591530000	1105400000	482600000	1305900000	525000000	1089800000	2832900000	1197500000	1196500000	1824600000	1735700000	671590000	1542900000	1506300000	1149400000	1158800000	923720000	1334900000	2008500000	1707600000	2056700000	1899600000	1605900000	1853600000	1767800000	1623900000	1755200000	1665800000	1549800000	1703100000	1614500000	1549900000	2302300000	1571900000	1789500000
ITGB1	NP_999133.1	NP_999133.1	NP_999133.1 integrin beta-1 precursor GN=ITGB1 [Sus scrofa]	2	26	35880000000	1061300000	1682600000	1389200000	1126200000	1804600000	1695700000	2050600000	956080000	535170000	978620000	651580000	1767600000	527040000	846760000	2251800000	1242800000	1438500000	1913100000	1582900000	638640000	2397500000	1566800000	1826000000	719960000	1110500000	2118900000	1261000000	2017500000	1589000000	1337200000	2019200000	1608500000	2159000000	1381700000	1504800000	1535900000	1959500000	2228900000	1718300000	1349800000	1968800000	1857200000	1982200000
PPP2R1A	NP_999189.1	NP_999189.1	NP_999189.1 serine/threonine-protein phosphatase 2A 65 kDa regulatory subunit A alpha isoform GN=PPP2R1A [Sus scrofa]	25	33	35841000000	2061400000	1513800000	1999700000	1393700000	1498600000	2135400000	1977500000	1535900000	577160000	1442700000	450040000	1413000000	517520000	1259800000	2212600000	1129800000	1238100000	1633900000	1765300000	721220000	1608900000	1555700000	1064100000	1026000000	742000000	1367000000	2193100000	1812000000	2044100000	1638000000	1760000000	2065900000	1898200000	2090100000	1619200000	2102200000	1411600000	1739800000	1559200000	1827000000	1909600000	1459100000	1785900000
RPLP2	NP_001231795.1	NP_001231795.1	NP_001231795.1 60S acidic ribosomal protein P2 GN=RPLP2 [Sus scrofa]	8	8	35788000000	1880400000	1527300000	2166900000	1467900000	1174400000	1756800000	1607200000	1565000000	767690000	1274700000	529100000	1006300000	734810000	1121400000	2429400000	1357200000	1282800000	1489900000	1756000000	989740000	1203500000	1632200000	1064100000	968700000	1227800000	1807300000	2198800000	1789000000	2243700000	1752000000	1427100000	1673200000	1706200000	2260100000	2069300000	1814200000	1686800000	1653300000	2057200000	2027000000	2052200000	1998300000	1933300000
LAMA4	XP_013848215.2	XP_013848215.2	XP_013848215.2 LOW QUALITY PROTEIN: laminin subunit alpha-4 GN=LAMA4 [Sus scrofa]	64	64	35656000000	1638900000	1479100000	1848000000	1720600000	1687600000	2135400000	2126400000	1319100000	610460000	1233300000	584500000	1302800000	419220000	994470000	2337200000	1314000000	1034700000	1695900000	1669800000	691740000	1627900000	1323500000	1589600000	1359900000	808900000	1103500000	1719600000	1659800000	1992200000	2039400000	1905700000	1960500000	2036100000	1762500000	1694100000	1736900000	2171900000	1747800000	1591200000	1720100000	1902100000	1794800000	1603500000
AKR1A1	XP_020949157.1;XP_020949156.1;XP_020949154.1;NP_999055.1;XP_020949153.1	XP_020949157.1;XP_020949156.1;XP_020949154.1;NP_999055.1;XP_020949153.1	XP_020949157.1 alcohol dehydrogenase isoform X2 GN=AKR1A1 [Sus scrofa];XP_020949156.1 alcohol dehydrogenase isoform X2 GN=AKR1A1 [Sus scrofa];XP_020949154.1 alcohol dehydrogenase isoform X2 GN=AKR1A1 [Sus scrofa];NP_999055.1 alcohol dehydrogenase GN=AK	17	17	35602000000	1637700000	1785500000	1873700000	1611700000	1625200000	2376900000	2055600000	1299100000	660180000	1229500000	530780000	1329500000	629540000	1313700000	2087500000	1136700000	872080000	1546500000	1688700000	717360000	1491100000	1443800000	1301200000	1021500000	1000100000	1337200000	1807300000	1971800000	1983400000	1844700000	1803000000	2218300000	1996600000	1679900000	1815900000	1881600000	1806800000	1592600000	1832300000	1781600000	1735800000	1753200000	1483700000
GANAB	XP_005660829.1;XP_020936320.1	XP_005660829.1;XP_020936320.1	XP_005660829.1 neutral alpha-glucosidase AB isoform X3 GN=GANAB [Sus scrofa];XP_020936320.1 neutral alpha-glucosidase AB isoform X1 GN=GANAB [Sus scrofa]	2	49	35520000000	1520000000	1657600000	2001300000	1172600000	1339900000	1959000000	1690200000	1509000000	711610000	1151500000	536990000	1398400000	533880000	1246100000	2423600000	1287800000	1134600000	1528100000	1513600000	794010000	1598500000	1482700000	1445100000	1224100000	1221600000	1438000000	1741400000	1896800000	2102600000	1511000000	1589900000	1883100000	1823500000	1890500000	2076600000	1706300000	1920300000	1705900000	1803900000	1763100000	2285200000	1850700000	1779600000
LOC100153899	XP_020955330.1;XP_001928857.4	XP_020955330.1;XP_001928857.4	XP_020955330.1 serpin A3-8 GN=LOC100153899 [Sus scrofa];XP_001928857.4 serpin A3-8 GN=LOC100153899 [Sus scrofa]	13	13	35505000000	1751400000	1705200000	1220500000	600040000	2772600000	219890000	165680000	1644700000	698200000	988120000	169110000	2670600000	348740000	694400000	188070000	1834900000	2942200000	3974400000	1617500000	294760000	491800000	1170200000	3832700000	1185600000	1922100000	402220000	2130800000	2251500000	1278000000	1015900000	3493100000	315880000	360180000	2364300000	1598300000	1521300000	615770000	3238100000	1130100000	1110800000	223060000	3008800000	3566100000
PALM2AKAP2	XP_020943345.1;XP_020943300.1;XP_020943450.1;XP_020943558.1;XP_020943497.1;NP_001191110.1	XP_020943345.1;XP_020943300.1;XP_020943450.1;XP_020943558.1;XP_020943497.1;NP_001191110.1	XP_020943345.1 A-kinase anchor protein 2 isoform X2 GN=PALM2AKAP2 [Sus scrofa];XP_020943300.1 A-kinase anchor protein 2 isoform X1 GN=PALM2AKAP2 [Sus scrofa];XP_020943450.1 A-kinase anchor protein 2 isoform X4 GN=PALM2AKAP2 [Sus scrofa];XP_020943558.1 A-ki	3	37	35332000000	1587700000	1473400000	1637900000	1537600000	1490800000	1984700000	2159500000	1391600000	696400000	1132500000	670430000	1503200000	603710000	1102800000	2489500000	1076000000	1072700000	1380800000	1376400000	752210000	1653900000	1456800000	1235600000	1226400000	801690000	1837400000	1740100000	1809500000	1849100000	1778800000	1739800000	1900100000	2176700000	1698400000	1801300000	1592000000	1915100000	1697900000	1665400000	1572800000	1990300000	1777300000	1714200000
CCT8	XP_003358947.2	XP_003358947.2	XP_003358947.2 LOW QUALITY PROTEIN: T-complex protein 1 subunit theta GN=CCT8 [Sus scrofa]	34	34	35257000000	1625100000	1512300000	1917200000	1323400000	1348400000	1824100000	1716200000	1448000000	752260000	1237800000	579450000	1223500000	578640000	1431500000	1682700000	1231400000	1244000000	1473200000	1732700000	861840000	1421200000	1641800000	1503100000	1328500000	1092100000	1526800000	1934100000	1856600000	2043200000	1694000000	1635100000	1677700000	1695200000	1978700000	2278200000	1775200000	1962500000	1800800000	1782200000	1769200000	1868200000	1766600000	1886500000
HRG	NP_001231568.1	NP_001231568.1	NP_001231568.1 histidine-rich glycoprotein precursor GN=HRG [Sus scrofa]	19	19	35255000000	798630000	623970000	877900000	4401900000	1216000000	1377100000	2209300000	1147500000	455620000	1046800000	970120000	1196300000	1833100000	7545100000	1940200000	786600000	574730000	553220000	553060000	1114900000	1889700000	435730000	455940000	226650000	196940000	828040000	907790000	753590000	1105300000	5050000000	1468800000	1310200000	2342400000	1516500000	1641600000	1674800000	2961600000	1493200000	5372900000	9945600000	1740900000	993950000	970440000
ANXA4	NP_001161111.1	NP_001161111.1	NP_001161111.1 annexin A4 GN=ANXA4 [Sus scrofa]	28	28	35180000000	1411800000	1871200000	2030900000	1237200000	1767500000	2095800000	1862100000	1098400000	612640000	1017200000	640070000	1881700000	591380000	1022800000	2025900000	1208100000	1362200000	1718200000	1605000000	860300000	1342500000	1181100000	1540400000	731640000	885930000	1577500000	1628300000	2258800000	2080000000	1504800000	2004000000	1946600000	1922400000	1641100000	1798200000	1818200000	2289300000	2156100000	1833900000	1602300000	1678900000	1829000000	2023000000
PYGL	NP_001116644.1	NP_001116644.1	NP_001116644.1 glycogen phosphorylase, liver form GN=PYGL [Sus scrofa]	44	50	34991000000	1934000000	1598400000	1602300000	1537300000	1372900000	1927700000	1761300000	1224700000	708830000	1601700000	783130000	1570000000	657730000	1155700000	1623300000	1149100000	1299500000	1316300000	1145200000	598760000	1725100000	1692400000	1374600000	1042300000	1053500000	1534700000	2001400000	1995700000	1793100000	1873600000	1636800000	1858700000	1791700000	1729200000	1993900000	2159000000	2336100000	1825400000	1939300000	1660400000	1499900000	1675600000	1883800000
KRT18	XP_005652636.3	XP_005652636.3	XP_005652636.3 keratin, type I cytoskeletal 18 GN=KRT18 [Sus scrofa]	20	30	34905000000	1182200000	1519200000	1199700000	1659500000	1296600000	2127600000	1215100000	1047200000	537550000	728530000	433990000	1996200000	405200000	847880000	3430600000	770270000	1740800000	1109000000	1293700000	1249300000	1837400000	1442700000	1128000000	1421400000	1044000000	2241500000	1358600000	1898600000	1679600000	1109800000	1476300000	2296400000	1402700000	1303100000	1477900000	980200000	1323800000	2019400000	1236600000	1138600000	2672300000	1230500000	2176200000
TCP1	NP_001230356.1	NP_001230356.1	NP_001230356.1 T-complex protein 1 subunit alpha GN=TCP1 [Sus scrofa]	30	30	34725000000	1670000000	1386800000	1699800000	1386200000	1153800000	1867400000	1729900000	1408000000	676750000	1319000000	424570000	1376300000	530660000	1301300000	2061500000	1215100000	1214700000	1511300000	1684200000	828830000	1584900000	1586200000	1373900000	1250200000	1083000000	1400700000	1895400000	1654000000	1713900000	1622500000	1450600000	1721400000	1721900000	1940500000	1894500000	1724300000	1575900000	1770500000	1512600000	1619800000	1795800000	1813300000	1753300000
AP2B1	XP_020921804.1;XP_020921803.1;XP_020921802.1;NP_001230112.1	XP_020921804.1;XP_020921803.1;XP_020921802.1;NP_001230112.1	XP_020921804.1 AP-2 complex subunit beta isoform X2 GN=AP2B1 [Sus scrofa];XP_020921803.1 AP-2 complex subunit beta isoform X1 GN=AP2B1 [Sus scrofa];XP_020921802.1 AP-2 complex subunit beta isoform X1 GN=AP2B1 [Sus scrofa];NP_001230112.1 AP-2 complex subuni	33	48	34714000000	1638600000	1379200000	1809400000	1393600000	1251100000	2076600000	1735000000	1513000000	619220000	1304100000	527700000	1401500000	550880000	1139800000	2310500000	1144100000	1088600000	1516000000	1526900000	731030000	1748600000	1438600000	1263800000	1164600000	1024800000	1416400000	1849900000	1623200000	1939700000	1662300000	1600500000	1954100000	1786500000	1945600000	1924100000	1894400000	1939900000	1767100000	1698700000	1728800000	1902100000	1625700000	1647800000
LASP1	XP_020922719.1;XP_020922720.1	XP_020922719.1;XP_020922720.1	XP_020922719.1 LIM and SH3 domain protein 1 isoform X1 GN=LASP1 [Sus scrofa];XP_020922720.1 LIM and SH3 domain protein 1 isoform X2 GN=LASP1 [Sus scrofa]	10	10	34403000000	1627100000	1477000000	1760600000	1657700000	1555300000	1809400000	1785400000	1252000000	804220000	1161900000	547150000	1213200000	583200000	1148300000	1864000000	1117000000	1228800000	1520400000	1944300000	778830000	1322300000	1400300000	1238400000	1041900000	1055500000	1508700000	1670000000	1742600000	1786900000	1895200000	1581300000	1503700000	1698600000	1677500000	1887900000	1571400000	1647800000	1511800000	1664700000	1611900000	1626700000	1721200000	1801400000
LAMA5	XP_020933877.1;XP_020933876.1	XP_020933877.1;XP_020933876.1	XP_020933877.1 laminin subunit alpha-5 isoform X2 GN=LAMA5 [Sus scrofa];XP_020933876.1 laminin subunit alpha-5 isoform X1 GN=LAMA5 [Sus scrofa]	87	88	34328000000	1201900000	1628800000	1542300000	1227200000	2254100000	2315800000	2245500000	899800000	415590000	741270000	600200000	2356000000	456620000	946140000	2127800000	1051500000	1174200000	2380900000	1510100000	522600000	1631700000	817800000	1353900000	711480000	832770000	1382300000	1305400000	1774500000	1897100000	1510600000	2453300000	1776100000	2017900000	1300900000	1325100000	1215600000	1838700000	2512300000	1352700000	1305900000	1572700000	1443600000	1528200000
CLIC4	XP_020951248.1	XP_020951248.1	XP_020951248.1 chloride intracellular channel protein 4 GN=CLIC4 [Sus scrofa]	22	23	33952000000	1650000000	1462800000	1599300000	1631900000	1231700000	2005200000	1938300000	1406900000	614020000	1129800000	468590000	1361900000	512950000	1053500000	2326200000	1133200000	1196900000	1685000000	1582100000	711990000	1651100000	1418600000	1222800000	988540000	608930000	1359900000	1879800000	1874600000	1694700000	1912100000	1598000000	1881600000	1931800000	1879900000	1540300000	1682900000	1601900000	1778300000	1560500000	1639200000	1994500000	1569900000	1797500000
DDX39B	XP_005665851.1;XP_005665850.1;NP_001005157.1;XP_005665849.1;XP_020954000.1	XP_005665851.1;XP_005665850.1;NP_001005157.1;XP_005665849.1;XP_020954000.1	XP_005665851.1 spliceosome RNA helicase DDX39B isoform X3 GN=DDX39B [Sus scrofa];XP_005665850.1 spliceosome RNA helicase DDX39B isoform X3 GN=DDX39B [Sus scrofa];NP_001005157.1 spliceosome RNA helicase DDX39B GN=DDX39B [Sus scrofa];XP_005665849.1 spliceoso	13	27	33916000000	1455600000	1329300000	1788600000	1434400000	1207900000	1941300000	1696700000	1470200000	700000000	1258600000	549260000	1306200000	652080000	1132700000	1978700000	977400000	1134600000	1413600000	1608900000	852430000	1493400000	1504300000	1208400000	1291100000	1157200000	1373300000	1797500000	1664100000	1966700000	1744700000	1572900000	1915200000	1920700000	1933100000	1940100000	1837900000	1918000000	1633200000	1840100000	1770200000	1808300000	1512400000	1750300000
CLIC5	NP_001185852.2	NP_001185852.2	NP_001185852.2 chloride intracellular channel protein 5 GN=CLIC5 [Sus scrofa]	15	16	33761000000	1699200000	1571300000	1417800000	1173800000	1649200000	1874700000	2186200000	1318100000	635360000	1297400000	507390000	1820900000	396380000	1161700000	1606300000	747150000	1173200000	1270400000	1430700000	527420000	1907400000	1717300000	1024000000	1256900000	810530000	1579900000	1947400000	2007000000	1541700000	1625700000	1916500000	1815600000	2347200000	1745300000	1828500000	1947800000	1685500000	2088900000	1390000000	1575400000	1484700000	1210500000	1834100000
CCT5	XP_020932224.1	XP_020932224.1	XP_020932224.1 T-complex protein 1 subunit epsilon isoform X1 GN=CCT5 [Sus scrofa]	2	38	33732000000	1429000000	1433500000	1751700000	1246400000	1229300000	1665200000	1540200000	1375200000	673740000	1130800000	423150000	1318000000	408360000	1357300000	2042700000	1294700000	1083500000	1514600000	1766000000	690990000	1665400000	1702900000	1317400000	1328600000	1173100000	1170700000	1663900000	1749500000	1765800000	1505900000	1521600000	1526900000	1598100000	1925600000	1893100000	1793800000	1762000000	1623900000	1474900000	1656200000	1754200000	1812200000	1713500000
GOT2	NP_999093.1	NP_999093.1	NP_999093.1 aspartate aminotransferase, mitochondrial precursor GN=GOT2 [Sus scrofa]	24	24	33717000000	1222000000	1263300000	1354200000	1243300000	1387200000	1641400000	1405400000	1184500000	482130000	1043900000	477110000	1337600000	603260000	1137300000	2415500000	880960000	1345200000	1755900000	1730900000	878260000	1811000000	1361100000	1558600000	1333400000	1039400000	1823600000	1559100000	1589500000	1465500000	1523700000	1511500000	1664600000	1514800000	1511400000	1547200000	1535100000	1746600000	1609500000	1711300000	1503400000	2185500000	1330900000	1883300000
DBI	NP_999284.1	NP_999284.1	NP_999284.1 acyl-CoA-binding protein GN=DBI [Sus scrofa]	8	8	33662000000	1683600000	1455100000	1913800000	1442500000	1541800000	2048300000	1629800000	1228800000	737700000	1183700000	617900000	1389000000	649880000	1473700000	1962800000	1358700000	924450000	1118400000	1197600000	489090000	1633800000	1671800000	1014400000	949690000	934990000	1411100000	1901000000	1856800000	1973900000	1776200000	1955400000	1920900000	1798300000	1656700000	2252100000	1758300000	2030800000	1785200000	1728000000	1805200000	1830700000	1890700000	1488200000
CNN3	XP_003125950.3	XP_003125950.3	XP_003125950.3 LOW QUALITY PROTEIN: calponin-3 GN=CNN3 [Sus scrofa]	16	17	33521000000	1451600000	1184300000	1590400000	1452100000	1330400000	1945800000	1841100000	1055600000	713190000	1123900000	572360000	1202700000	555440000	977580000	2310900000	1185500000	1032700000	1679400000	1350300000	814790000	1669900000	1408500000	1573600000	1235400000	751430000	1512200000	1657600000	1423000000	1718000000	1873300000	1526500000	1899600000	1889900000	1631800000	2133500000	1593000000	1794200000	1490400000	1704100000	1496200000	2046600000	1850300000	1506600000
SEPTIN11	XP_005666843.1;XP_005666842.1;XP_003129144.1;XP_013834262.1;XP_005666839.1;XP_005666838.1;XP_020957132.1;XP_020957131.1;XP_020957130.1;XP_020957128.1;XP_020957135.1;XP_020957133.1;XP_020957136.1	XP_005666843.1;XP_005666842.1;XP_003129144.1;XP_013834262.1;XP_005666839.1;XP_005666838.1;XP_020957132.1;XP_020957131.1;XP_020957130.1;XP_020957128.1;XP_020957135.1;XP_020957133.1;XP_020957136.1	XP_005666843.1 septin-11 isoform X8 GN=SEPTIN11 [Sus scrofa];XP_005666842.1 septin-11 isoform X7 GN=SEPTIN11 [Sus scrofa];XP_003129144.1 septin-11 isoform X6 GN=SEPTIN11 [Sus scrofa];XP_013834262.1 septin-11 isoform X5 GN=SEPTIN11 [Sus scrofa];XP_005666839	16	28	33453000000	1554800000	1394800000	2275600000	1709900000	1061300000	2177500000	1438900000	1107600000	488440000	885920000	436260000	1017500000	427300000	1128700000	2901800000	1433000000	953970000	2015000000	1690700000	613440000	1369900000	1245700000	1247000000	989840000	718560000	1168900000	1434200000	1480700000	1844400000	1663700000	1382100000	1787400000	1549000000	1368200000	1548900000	1385400000	1611100000	1263400000	1549500000	1512000000	2052600000	1637000000	1549000000
VDAC2	XP_020927834.1;NP_999534.1	XP_020927834.1;NP_999534.1	XP_020927834.1 voltage-dependent anion-selective channel protein 2 isoform X1 GN=VDAC2 [Sus scrofa];NP_999534.1 voltage-dependent anion-selective channel protein 2 GN=VDAC2 [Sus scrofa]	15	15	33387000000	1071000000	1425800000	1386400000	1135800000	1470700000	1527700000	1666000000	928210000	593400000	1094200000	746770000	1549500000	635910000	1160500000	2066600000	1066600000	1083300000	1547500000	1279200000	893380000	1978200000	1591300000	1618700000	864130000	1185100000	1820600000	1265300000	1783400000	1516500000	1370500000	1773400000	1495100000	1722200000	1414200000	1657100000	1701900000	2295100000	1864600000	1813700000	1548800000	1908000000	1559600000	1724300000
CORO1A	XP_020943688.1;XP_020943687.1	XP_020943688.1;XP_020943687.1	XP_020943688.1 coronin-1A GN=CORO1A [Sus scrofa];XP_020943687.1 coronin-1A GN=CORO1A [Sus scrofa]	21	21	33333000000	2626300000	1998000000	1327000000	1440100000	1599400000	1497900000	1605800000	1326500000	575590000	1297300000	349310000	1278200000	497400000	1212100000	1310200000	1207300000	1771200000	1357900000	2201900000	341200000	1135600000	1461600000	886560000	720180000	1275300000	1033500000	2398900000	2113700000	1640700000	1479600000	2097200000	1256100000	1501400000	1747200000	1620400000	2013300000	1207300000	1705400000	1422000000	1774700000	1192400000	1816500000	2358600000
GLUD1	NP_001231430.1	NP_001231430.1	NP_001231430.1 glutamate dehydrogenase 1, mitochondrial GN=GLUD1 [Sus scrofa]	31	31	33054000000	1542600000	1541100000	1703100000	1255600000	1351100000	1583400000	1368800000	1096500000	700430000	1118600000	577110000	1265000000	537770000	960440000	2355000000	1010800000	1116400000	1611300000	1227300000	668430000	1742500000	1625700000	1436800000	1041300000	994460000	1622600000	1698100000	1814000000	1725200000	1467800000	1465600000	1572500000	1556900000	1593600000	2079300000	1704800000	2149400000	1528300000	1781100000	1398100000	1881400000	1577800000	1699300000
FABP3	NP_001093401.1	NP_001093401.1	NP_001093401.1 fatty acid-binding protein, heart GN=FABP3 [Sus scrofa]	9	9	32920000000	1847400000	1368300000	2310200000	1511000000	1891100000	2015000000	1517300000	1221100000	604340000	816100000	639530000	1030000000	445810000	848750000	1471200000	1152600000	1026000000	1747900000	1888900000	500290000	924580000	1175200000	1177900000	1463100000	1134700000	1192100000	2093900000	1764100000	2402300000	1826200000	2310000000	1972000000	1574000000	1669700000	1551500000	1242700000	1817000000	1690100000	1439300000	1396400000	1337200000	1602400000	1591800000
HSPA6	NP_001116599.1	NP_001116599.1	NP_001116599.1 heat shock 70 kDa protein GN=HSPA6 [Sus scrofa]	2	2	32713000000	1652800000	1431400000	1870900000	1330500000	1309800000	1838100000	1618500000	1263400000	696830000	915400000	459340000	1312600000	330400000	1434200000	1946800000	972280000	1297900000	1534700000	1626300000	645780000	1353700000	1287100000	1104900000	1175500000	1015900000	1288400000	0	0	0	0	0	0	0	0	0	0	1619000000	0	0	0	0	0	0
CCT2	NP_001163991.1;XP_020946622.1	NP_001163991.1;XP_020946622.1	NP_001163991.1 T-complex protein 1 subunit beta GN=CCT2 [Sus scrofa];XP_020946622.1 T-complex protein 1 subunit beta isoform X1 GN=CCT2 [Sus scrofa]	31	31	32622000000	1664000000	1514000000	1744800000	1088900000	1126800000	1829800000	1558300000	1255600000	667950000	981850000	524700000	1336800000	465270000	1180000000	1861200000	1246400000	1308300000	1538000000	1326800000	788050000	1378700000	1487700000	1361300000	1097300000	1017200000	1272600000	1705800000	1681700000	1670400000	1400700000	1396500000	1566300000	1583200000	1920600000	2144400000	1797500000	1805600000	1696500000	1606800000	1598300000	1752200000	1810200000	1653900000
AKAP12	XP_001927300.5	XP_001927300.5	XP_001927300.5 LOW QUALITY PROTEIN: A-kinase anchor protein 12 GN=AKAP12 [Sus scrofa]	58	58	32438000000	1472500000	1109100000	1654400000	2222500000	1340900000	1902500000	2095300000	1133000000	595320000	876140000	494310000	1137400000	518040000	1488100000	1969200000	1334200000	968200000	1829800000	1499300000	733700000	1110000000	979480000	1326900000	1224400000	548040000	875290000	1639600000	1363300000	1757100000	2423500000	1781600000	1608500000	1927600000	1599300000	1691700000	1439400000	1844300000	1455000000	1820600000	2212400000	1616600000	1782700000	1613600000
GNB4	XP_020925519.1;XP_013842734.1;XP_013842725.1;NP_001230422.1	XP_020925519.1	XP_020925519.1 guanine nucleotide-binding protein subunit beta-4 GN=GNB4 [Sus scrofa]	9	15	32319000000	1391600000	1366600000	1736700000	1400000000	1338600000	1826200000	1863800000	1107900000	531790000	1179500000	563320000	1470300000	517480000	1019000000	1703400000	1034000000	1243100000	1460500000	1437000000	542130000	1644400000	1447700000	1237400000	1302500000	733380000	1221000000	1694400000	1787900000	1361700000	1747600000	1635200000	1691600000	2028600000	1487900000	1324700000	1734000000	1759400000	1627400000	1440100000	1637200000	1592400000	1487600000	1573400000
STAT1	XP_020930319.1	XP_020930319.1	XP_020930319.1 signal transducer and activator of transcription 1 isoform X4 GN=STAT1 [Sus scrofa]	1	35	31938000000	1762200000	1925200000	1292600000	1018100000	1042300000	1553100000	2717600000	1065300000	626550000	1374800000	446540000	1289200000	548060000	1631100000	1485200000	740340000	711960000	782970000	1300200000	1228500000	1327100000	1439400000	722720000	618280000	1223000000	2065800000	1786600000	2285400000	1333500000	1335500000	1257900000	1506500000	2577700000	1419600000	2006100000	2004000000	1867900000	1528900000	1933900000	2075100000	1328700000	1395300000	1258100000
HNRNPD	XP_020957544.1;XP_020957543.1;XP_020957542.1;XP_020957541.1;XP_020957540.1;XP_020957539.1	XP_020957544.1;XP_020957543.1;XP_020957542.1;XP_020957541.1;XP_020957540.1;XP_020957539.1	XP_020957544.1 heterogeneous nuclear ribonucleoprotein D0 isoform X4 GN=HNRNPD [Sus scrofa];XP_020957543.1 heterogeneous nuclear ribonucleoprotein D0 isoform X3 GN=HNRNPD [Sus scrofa];XP_020957542.1 heterogeneous nuclear ribonucleoprotein D0 isoform X3 GN=	13	15	31906000000	1207100000	1368500000	1203100000	1411100000	1209100000	1814000000	1696400000	1373200000	693740000	1008300000	719720000	989330000	607460000	932010000	2390300000	1077900000	942300000	1798200000	1672300000	753860000	1323100000	1379500000	1214000000	1225000000	854020000	1042100000	1254200000	1393400000	1307200000	1431800000	1353300000	1588700000	1607500000	1517600000	1601300000	1570800000	1724600000	1597300000	1604700000	1429100000	1642600000	1270200000	1442100000
CTNND1	XP_005660946.1;XP_020938676.1;XP_020938672.1;XP_013849763.1;XP_005660947.1;XP_020938673.1;XP_020938674.1;XP_020938675.1;XP_005660948.1;XP_005660949.1;XP_020938678.1;XP_005660950.1;XP_020938679.1;XP_020938680.1;XP_020938681.1;XP_020938683.1;XP_005660952.1;XP_020938682.1;XP_020938684.1	XP_005660946.1;XP_020938676.1;XP_020938672.1;XP_013849763.1;XP_005660947.1;XP_020938673.1;XP_020938674.1;XP_020938675.1;XP_005660948.1;XP_005660949.1;XP_020938678.1;XP_005660950.1;XP_020938679.1;XP_020938680.1;XP_020938681.1;XP_020938683.1;XP_005660952.1;XP_020938682.1;XP_020938684.1	XP_005660946.1 catenin delta-1 isoform X1 GN=CTNND1 [Sus scrofa];XP_020938676.1 catenin delta-1 isoform X6 GN=CTNND1 [Sus scrofa];XP_020938672.1 catenin delta-1 isoform X1 GN=CTNND1 [Sus scrofa];XP_013849763.1 catenin delta-1 isoform X1 GN=CTNND1 [Sus scro	46	46	31850000000	1141600000	1539600000	1563000000	1281700000	1204600000	1811600000	1970700000	1011500000	544100000	1131800000	444330000	1237900000	444340000	943720000	2475500000	1231600000	945200000	1361300000	1279100000	565400000	1462200000	1547800000	1351000000	1003700000	760900000	1596200000	1345300000	1724200000	1642100000	1550800000	1368700000	1714100000	1873000000	1484900000	1538200000	1574200000	1713800000	1609400000	1478400000	1343200000	1740300000	1529600000	1487500000
UTRN	XP_020927932.1;XP_020927926.1;XP_020927920.1;XP_020927957.1;XP_020927948.1;XP_020927942.1;XP_020927939.1;XP_020927918.1;XP_020927913.1;XP_020927911.1;XP_020927969.1;XP_020927964.1;XP_020927962.1;XP_020927986.1;XP_020927985.1;XP_020927979.1	XP_020927932.1;XP_020927926.1;XP_020927920.1;XP_020927957.1;XP_020927948.1;XP_020927942.1;XP_020927939.1;XP_020927918.1;XP_020927913.1;XP_020927911.1;XP_020927969.1;XP_020927964.1;XP_020927962.1	XP_020927932.1 utrophin isoform X5 GN=UTRN [Sus scrofa];XP_020927926.1 utrophin isoform X4 GN=UTRN [Sus scrofa];XP_020927920.1 utrophin isoform X4 GN=UTRN [Sus scrofa];XP_020927957.1 utrophin isoform X9 GN=UTRN [Sus scrofa];XP_020927948.1 utrophin isoform	137	139	31776000000	1348100000	1242700000	1734300000	1295100000	1298500000	2071700000	1857200000	1068600000	479030000	1232200000	434980000	1498100000	409660000	755800000	1679600000	921590000	958290000	1545400000	1702500000	555440000	1614800000	1222700000	1386400000	1352700000	718070000	1392600000	1586900000	1431300000	1691900000	1573300000	1599800000	1772300000	1699200000	1496000000	1718700000	1655000000	1872900000	1646100000	1689300000	1458100000	1480800000	1497900000	1537400000
RPS3	XP_020957928.1;XP_020957927.1;XP_020957926.1;NP_001038066.1	XP_020957928.1;XP_020957927.1;XP_020957926.1;NP_001038066.1	XP_020957928.1 40S ribosomal protein S3 isoform X1 GN=RPS3 [Sus scrofa];XP_020957927.1 40S ribosomal protein S3 isoform X1 GN=RPS3 [Sus scrofa];XP_020957926.1 40S ribosomal protein S3 isoform X1 GN=RPS3 [Sus scrofa];NP_001038066.1 40S ribosomal protein S3	20	20	31689000000	1449000000	1390900000	1558300000	1250400000	1266600000	1736800000	1590800000	1132100000	624920000	1125900000	621690000	1204200000	560320000	1156600000	1936000000	1177700000	857390000	1229600000	1346400000	767880000	1444400000	1450700000	1186600000	1010700000	1178300000	1435100000	1537300000	1676200000	1766000000	1553900000	1394500000	1544400000	1616800000	1616900000	1765800000	1695500000	1942200000	1593400000	1881000000	1530100000	1772600000	1645800000	1391200000
ILF3	XP_020939457.1;XP_020939456.1;XP_020939455.1;XP_020939454.1;XP_020939453.1;XP_020939452.1	XP_020939457.1;XP_020939456.1;XP_020939455.1;XP_020939454.1;XP_020939453.1;XP_020939452.1	XP_020939457.1 interleukin enhancer-binding factor 3 isoform X4 GN=ILF3 [Sus scrofa];XP_020939456.1 interleukin enhancer-binding factor 3 isoform X4 GN=ILF3 [Sus scrofa];XP_020939455.1 interleukin enhancer-binding factor 3 isoform X3 GN=ILF3 [Sus scrofa];X	36	38	31636000000	1443700000	1396400000	1888500000	1348900000	1128300000	1917400000	1639800000	1158200000	541040000	1088400000	446880000	1046200000	452000000	1189600000	2012900000	1025800000	1247700000	1556900000	1360200000	627630000	1138900000	1385000000	1103600000	1051400000	799560000	1640500000	1521800000	1538800000	1820500000	1641700000	1393000000	1710100000	1580900000	1602000000	1614200000	1535300000	1668100000	1398100000	1428300000	1462300000	1634600000	1531400000	1734900000
CTSB	XP_020927423.1;XP_020927422.1;XP_013845747.1;XP_005657324.1;XP_005657323.1;NP_001090927.1;XP_005657322.3;XP_020927424.1	XP_020927423.1;XP_020927422.1;XP_013845747.1;XP_005657324.1;XP_005657323.1;NP_001090927.1;XP_005657322.3;XP_020927424.1	XP_020927423.1 cathepsin B isoform X2 GN=CTSB [Sus scrofa];XP_020927422.1 cathepsin B isoform X2 GN=CTSB [Sus scrofa];XP_013845747.1 cathepsin B isoform X2 GN=CTSB [Sus scrofa];XP_005657324.1 cathepsin B isoform X2 GN=CTSB [Sus scrofa];XP_005657323.1 cathe	14	14	31612000000	2416800000	1516800000	1224200000	1463700000	1329900000	2013800000	1546500000	1096100000	617050000	1369000000	496510000	1262800000	509200000	521170000	1590000000	700560000	1120600000	1046400000	1413100000	560070000	1584700000	1667600000	947010000	973810000	895510000	1728800000	2512900000	1894500000	1416100000	1909200000	1537600000	1839800000	1660200000	1374500000	1761400000	2049400000	1911300000	1481800000	1419800000	1038000000	1450100000	1053400000	1708300000
MYL9	NP_001231401.1	NP_001231401.1	NP_001231401.1 myosin regulatory light polypeptide 9 GN=MYL9 [Sus scrofa]	8	8	31558000000	1489300000	1144600000	1149400000	1375200000	1848600000	2126300000	1683200000	1641500000	561460000	947210000	371480000	1117700000	486850000	1235500000	2486900000	1292900000	826940000	1151400000	1125100000	623700000	1789400000	1446500000	1304000000	801560000	551750000	979980000	1702100000	1479700000	1246300000	1461600000	1939200000	1845400000	1539800000	2002900000	1861700000	1563800000	1453000000	1285400000	1351700000	1479000000	2166800000	2073500000	1156100000
TRIM25	XP_005657028.3	XP_005657028.3	XP_005657028.3 E3 ubiquitin/ISG15 ligase TRIM25 GN=TRIM25 [Sus scrofa]	25	25	31102000000	1199800000	895080000	1501700000	2222100000	1887200000	1152900000	1568500000	717150000	248080000	517530000	441450000	1327900000	621340000	1391100000	1249400000	2411500000	565930000	3643500000	1640100000	266490000	1183100000	634460000	1565500000	555770000	865900000	828170000	1771900000	1737400000	1653000000	1743900000	1426600000	1719000000	1667400000	1438300000	1407700000	1491300000	1801900000	1489600000	1627400000	1462900000	1653100000	1386200000	1465500000
ITGB2	NP_999073.1	NP_999073.1	NP_999073.1 integrin beta-2 precursor GN=ITGB2 [Sus scrofa]	29	29	31022000000	1549400000	1708100000	1744100000	1456800000	1379700000	2224000000	2018900000	1010300000	543190000	1202400000	508030000	1195500000	239490000	1095500000	225850000	1044800000	1433800000	1463800000	1548000000	528040000	1517700000	819690000	1291900000	1051100000	1021500000	1200000000	1889800000	2462100000	1379000000	1265500000	1562700000	1637100000	2036300000	1219200000	1749900000	2278900000	2198400000	1741300000	2043500000	1277200000	826300000	1142400000	2243700000
BCAM	XP_003481932.1;XP_013850432.1	XP_003481932.1;XP_013850432.1	XP_003481932.1 basal cell adhesion molecule isoform X1 GN=BCAM [Sus scrofa];XP_013850432.1 basal cell adhesion molecule isoform X2 GN=BCAM [Sus scrofa]	28	28	30856000000	886400000	1274700000	1847700000	1183100000	1860500000	1939700000	2254300000	863710000	476420000	953720000	610180000	1714900000	458020000	1089800000	1629200000	769840000	964630000	1310400000	1138500000	543990000	1597200000	1368300000	1088800000	905690000	615040000	1511400000	1294700000	1658200000	1882100000	1569000000	2092500000	1800300000	2313100000	1247600000	1442800000	1492000000	1896000000	2054700000	1435700000	1519500000	1602000000	1245400000	1447700000
VAT1	XP_005657006.1	XP_005657006.1	XP_005657006.1 synaptic vesicle membrane protein VAT-1 homolog GN=VAT1 [Sus scrofa]	26	26	30577000000	1180000000	1217800000	1825100000	1146200000	888850000	1635800000	1338800000	1356000000	636360000	1181900000	494960000	1220200000	532570000	1195600000	1828800000	1090000000	934860000	1411500000	1248600000	706450000	1293100000	1515200000	1208000000	1082100000	937860000	1470800000	1495600000	1543400000	1886800000	1279900000	1260200000	1528800000	1453400000	1682900000	1664500000	1669400000	1633900000	1540900000	1591900000	1567100000	1680400000	1403300000	1526600000
EEF1G	XP_005660855.3	XP_005660855.3	XP_005660855.3 LOW QUALITY PROTEIN: elongation factor 1-gamma GN=EEF1G [Sus scrofa]	24	24	30243000000	1386400000	1312700000	1604000000	1189400000	971540000	1669500000	1452100000	1265900000	733340000	1099800000	463800000	1162400000	473750000	1117400000	2208000000	1061900000	869920000	1418700000	1345800000	525950000	1418000000	1218400000	1113000000	1041300000	926090000	1194000000	1720600000	1636400000	1823100000	1509900000	1288100000	1598400000	1504200000	1747600000	1876400000	1585400000	1653800000	1418200000	1472700000	1494300000	1886100000	1575900000	1418100000
VDAC1	XP_020936424.1;XP_005653007.1;XP_005653006.1;XP_005653005.1;NP_999125.1	XP_020936424.1;XP_005653007.1;XP_005653006.1;XP_005653005.1;NP_999125.1	XP_020936424.1 voltage-dependent anion-selective channel protein 1 isoform X1 GN=VDAC1 [Sus scrofa];XP_005653007.1 voltage-dependent anion-selective channel protein 1 isoform X1 GN=VDAC1 [Sus scrofa];XP_005653006.1 voltage-dependent anion-selective channel	18	18	30144000000	961780000	1198500000	1338000000	982380000	1268700000	1492200000	1684400000	926290000	429420000	910380000	564540000	1350100000	467580000	985100000	2126700000	897650000	981440000	1469400000	1216900000	815700000	1862400000	1271200000	1354500000	823870000	1018900000	1746400000	1105100000	1514700000	1462000000	1196100000	1392800000	1433100000	1681700000	1274700000	1319800000	1411000000	1776600000	1560100000	1536400000	1432500000	1775100000	1488300000	1464900000
LOC100158003	XP_001928233.2	XP_001928233.2	XP_001928233.2 LOW QUALITY PROTEIN: tubulin alpha-1D chain GN=LOC100158003 [Sus scrofa]	2	2	30142000000	1200300000	996220000	1455700000	875640000	961590000	1547800000	1420000000	1975800000	1160900000	1228200000	680790000	1259200000	806620000	1462600000	1428600000	500130000	854830000	842890000	973280000	794870000	1490800000	1797100000	1195700000	982530000	876940000	1373300000	1788200000	1511800000	2474300000	1418900000	1577800000	1802200000	1687200000	2208300000	2183700000	1669300000	1455900000	2160600000	1563200000	2028900000	1799900000	1102500000	1539600000
RAC1	NP_001230514.1;XP_020941412.1;XP_020922061.1;XP_020922062.1;XP_005662632.1;XP_005659127.1;XP_005662631.1	NP_001230514.1;XP_020941412.1;XP_020922061.1	NP_001230514.1 ras-related C3 botulinum toxin substrate 1 GN=RAC1 [Sus scrofa];XP_020941412.1 ras-related C3 botulinum toxin substrate 1 isoform X1 GN=RAC1 [Sus scrofa];XP_020922061.1 ras-related C3 botulinum toxin substrate 3 isoform X1 GN=RAC3 [Sus scrof	6	10	30064000000	1176500000	1416000000	1289600000	996640000	1260900000	1775400000	1733600000	908910000	590520000	1151900000	731300000	1358800000	525030000	1191400000	1726800000	897210000	1100500000	1020900000	1106400000	309810000	1784100000	1482700000	1173500000	815900000	908730000	1631300000	1304300000	1791400000	1492800000	1348200000	1647700000	1844700000	1812600000	1256100000	1353600000	1511500000	2203600000	1705300000	1495800000	1505000000	1574400000	1264700000	1704200000
MYOF	XP_020929515.1;XP_020929514.1;XP_020929513.1;XP_020929511.1;XP_020929512.1	XP_020929515.1;XP_020929514.1;XP_020929513.1;XP_020929511.1;XP_020929512.1	XP_020929515.1 myoferlin isoform X5 GN=MYOF [Sus scrofa];XP_020929514.1 myoferlin isoform X4 GN=MYOF [Sus scrofa];XP_020929513.1 myoferlin isoform X3 GN=MYOF [Sus scrofa];XP_020929511.1 myoferlin isoform X1 GN=MYOF [Sus scrofa];XP_020929512.1 myoferlin iso	102	102	29963000000	933010000	1427600000	1650900000	908990000	1572800000	1717000000	1730500000	846260000	466070000	803750000	554310000	1570700000	392350000	836820000	2446600000	738040000	982220000	1400700000	1210900000	606500000	1770800000	1325700000	1063100000	769110000	846920000	1391000000	1147500000	1589500000	1701600000	1220500000	1704700000	1669700000	1596400000	1213300000	1409800000	1321700000	1935300000	1771400000	1427100000	1177600000	1800600000	1227300000	1486900000
CNDP2	XP_020918145.1;XP_020918104.1;XP_005659874.1;NP_001230636.1	XP_020918145.1;XP_020918104.1;XP_005659874.1;NP_001230636.1	XP_020918145.1 cytosolic non-specific dipeptidase isoform X1 GN=CNDP2 [Sus scrofa];XP_020918104.1 cytosolic non-specific dipeptidase isoform X1 GN=CNDP2 [Sus scrofa];XP_005659874.1 cytosolic non-specific dipeptidase isoform X1 GN=CNDP2 [Sus scrofa];NP_0012	29	29	29873000000	2146600000	1587700000	1735200000	1150300000	1185600000	1889000000	2206100000	1060800000	479150000	1317000000	512020000	1300300000	406620000	1069000000	1067300000	586470000	926440000	978060000	1539900000	684870000	1247100000	1170300000	692190000	900670000	897710000	1136100000	2196900000	1987800000	1720900000	1455700000	1404500000	1630800000	2051200000	1390800000	1514800000	1895600000	1672200000	1605600000	1396900000	1476500000	981220000	1106500000	1472000000
PALLD	XP_020928969.1;XP_020928972.1;XP_020928971.1;XP_020928968.1;XP_020928970.1	XP_020928969.1;XP_020928972.1;XP_020928971.1;XP_020928968.1;XP_020928970.1	XP_020928969.1 palladin isoform X2 GN=PALLD [Sus scrofa];XP_020928972.1 palladin isoform X4 GN=PALLD [Sus scrofa];XP_020928971.1 palladin isoform X4 GN=PALLD [Sus scrofa];XP_020928968.1 palladin isoform X1 GN=PALLD [Sus scrofa];XP_020928970.1 palladin isof	2	31	29774000000	1344400000	1031400000	1541000000	1497400000	1400900000	1871900000	1345100000	1279600000	655890000	845160000	408920000	835920000	433990000	1091700000	2801800000	1039300000	785060000	1242000000	1269100000	469440000	1681200000	1103700000	1282700000	899200000	673160000	944250000	1428600000	1292100000	1580700000	1795600000	1643400000	1532500000	1446800000	1652600000	1733800000	1303000000	1597500000	1034600000	1322100000	1290000000	2165300000	1568500000	1228500000
CCT3	NP_001231109.1	NP_001231109.1	NP_001231109.1 T-complex protein 1 subunit gamma GN=CCT3 [Sus scrofa]	31	31	29655000000	1404800000	1328100000	1283900000	1128400000	982650000	1661700000	1469300000	1192200000	480370000	943500000	376910000	1194500000	436060000	1030700000	1989800000	892320000	1030600000	1200200000	1568500000	647940000	1411200000	1509900000	1144200000	1174800000	945550000	1226800000	1579300000	1534300000	1462300000	1338900000	1270200000	1445900000	1391000000	1563800000	1603400000	1466900000	1534400000	1485600000	1485600000	1326200000	1629200000	1470700000	1519900000
HADH	NP_999496.1	NP_999496.1	NP_999496.1 hydroxyacyl-coenzyme A dehydrogenase, mitochondrial precursor GN=HADH [Sus scrofa]	12	12	29650000000	1103600000	1036100000	1736500000	1431900000	1341800000	1232900000	1350500000	1093800000	508800000	1019200000	370270000	1581800000	336650000	1114400000	1513800000	1002100000	916350000	1417900000	1349600000	684580000	1424100000	1336000000	1563300000	1176700000	934940000	1071900000	1418300000	1275300000	1713100000	1735600000	1586000000	1433800000	1455300000	1470000000	1026100000	1405100000	1106800000	1812900000	868330000	1566900000	1505700000	1606400000	1321700000
CAPZA1	NP_001090923.1	NP_001090923.1	NP_001090923.1 F-actin-capping protein subunit alpha-1 GN=CAPZA1 [Sus scrofa]	11	13	29601000000	1480400000	1218700000	1542700000	1201100000	1180700000	1549800000	1504300000	1171100000	724690000	1157500000	536030000	1229200000	563700000	1082900000	1443600000	917060000	1020500000	1179700000	1362600000	587250000	1374000000	1299300000	1092700000	987450000	936770000	1256700000	1756500000	1554100000	1694700000	1498600000	1414700000	1593900000	1594300000	1572600000	2162900000	1722600000	1680900000	1671900000	1739500000	1445200000	1314400000	1229200000	1677000000
NPM1	XP_013846116.1	XP_013846116.1	XP_013846116.1 nucleophosmin GN=NPM1 [Sus scrofa]	13	13	29442000000	1460100000	1322800000	1578500000	1061200000	1175100000	1871100000	1793800000	1175200000	452420000	1010200000	374680000	913170000	384950000	1052400000	1711900000	1044500000	1045700000	1358000000	1529000000	516900000	1189700000	1228700000	1134700000	1032000000	966900000	1058400000	1549300000	1541000000	1937200000	1399000000	1360200000	1537000000	1583700000	1616600000	1136000000	1430100000	945290000	1316600000	979540000	1607700000	1683600000	1640600000	1416900000
COL4A1	XP_020921569.1	XP_020921569.1	XP_020921569.1 LOW QUALITY PROTEIN: collagen alpha-1(IV) chain GN=COL4A1 [Sus scrofa]	6	8	29233000000	590040000	901880000	1032600000	718280000	1616300000	1060700000	2235200000	784810000	304780000	670740000	380590000	2311000000	345460000	671850000	2613800000	1094600000	719140000	2243900000	745850000	312030000	2164700000	698060000	1973000000	280700000	658400000	2104300000	656840000	1129600000	920590000	928260000	1738200000	1075000000	1495100000	911820000	504990000	889350000	811420000	1998300000	737920000	776970000	1611100000	1085900000	1019200000
CORO1B	XP_020938415.1	XP_020938415.1	XP_020938415.1 coronin-1B GN=CORO1B [Sus scrofa]	20	20	29211000000	1909100000	1440100000	1261000000	1233100000	1144700000	1724600000	1712400000	976970000	479930000	1537800000	636560000	1298300000	505820000	848150000	1567100000	832000000	939940000	1023200000	1164300000	436190000	1527200000	1338400000	1055300000	910460000	628450000	1080100000	2138300000	1720200000	1522700000	1574400000	1602700000	1686000000	1832500000	1328000000	1466500000	2305800000	1938400000	1792800000	1464300000	1365300000	1362000000	1112500000	1440200000
ARPC1B	XP_020941233.1;XP_020941232.1;NP_001127828.1	XP_020941233.1;XP_020941232.1;NP_001127828.1	XP_020941233.1 actin-related protein 2/3 complex subunit 1B isoform X1 GN=ARPC1B [Sus scrofa];XP_020941232.1 actin-related protein 2/3 complex subunit 1B isoform X1 GN=ARPC1B [Sus scrofa];NP_001127828.1 actin-related protein 2/3 complex subunit 1B GN=ARPC1	19	20	29194000000	1886000000	1464200000	1189400000	1392100000	972240000	1953900000	1821600000	1138300000	507490000	1446300000	517650000	1190700000	400270000	1107200000	1576800000	807950000	888970000	959310000	1369700000	311580000	1250000000	1344300000	878080000	617940000	956880000	1245500000	1685900000	1595900000	1218300000	1547800000	1230900000	1651300000	1718000000	1410100000	1385000000	1793800000	1504200000	1522400000	1285100000	1350400000	1138700000	1044000000	1289200000
FSCN1	NP_001139772.1	NP_001139772.1	NP_001139772.1 fascin GN=FSCN1 [Sus scrofa]	25	25	29149000000	861060000	872090000	2435300000	1305500000	1073600000	1930900000	1773800000	1461100000	625400000	886540000	333820000	713630000	582190000	1399300000	1728300000	827230000	599340000	1534000000	2344900000	592970000	857390000	600310000	1119500000	907890000	1100700000	682190000	1056600000	1185800000	2604200000	1580000000	1320100000	1904300000	1864800000	1953000000	1570700000	1439700000	1247100000	947720000	1477500000	1814900000	1557100000	1266400000	1014600000
NPEPPS	XP_003131575.2	XP_003131575.2	XP_003131575.2 puromycin-sensitive aminopeptidase GN=NPEPPS [Sus scrofa]	43	43	29075000000	1433500000	1221600000	1712300000	1303400000	1168700000	1848300000	1532500000	1017400000	555310000	959160000	490980000	1167200000	454810000	1235200000	1520100000	852280000	862800000	1428000000	1311900000	500570000	1260500000	1182800000	1179700000	1094200000	767560000	1014400000	1555800000	1434100000	1752200000	1569300000	1488600000	1633500000	1522100000	1489900000	1647400000	1547100000	1706100000	1481000000	1502800000	1572400000	1319300000	1294800000	1318000000
MAOA	NP_001001640.1	NP_001001640.1	NP_001001640.1 amine oxidase A GN=MAOA [Sus scrofa]	5	20	29050000000	1059800000	1431200000	1354900000	1207200000	1533200000	1496400000	1587000000	905570000	394000000	779540000	514350000	1359400000	418530000	1077200000	1865200000	943540000	907590000	1569800000	1515800000	539520000	1242700000	1050700000	1553700000	918650000	840430000	984050000	1183400000	1660700000	1549600000	1397000000	1790300000	1437000000	1556800000	1159100000	1283800000	1268100000	1639300000	1536000000	1270900000	1362700000	1519300000	1296400000	1261500000
CANX	XP_020934812.1;NP_001230139.1	XP_020934812.1;NP_001230139.1	XP_020934812.1 calnexin isoform X1 GN=CANX [Sus scrofa];NP_001230139.1 calnexin precursor GN=CANX [Sus scrofa]	27	27	29044000000	1168400000	1708000000	1428300000	917400000	1157000000	1591900000	1636700000	763490000	480580000	681620000	577920000	1389200000	593850000	810330000	1838000000	935550000	1144200000	1257000000	1643300000	613030000	1427000000	1434900000	1065200000	493690000	903230000	1384600000	1342100000	1961400000	1483800000	1105300000	1355500000	1301700000	1488700000	1146200000	1520100000	1356200000	2013700000	1557500000	1629200000	1231500000	1512300000	1347600000	1404200000
AHCY	NP_001011727.1	NP_001011727.1	NP_001011727.1 adenosylhomocysteinase GN=AHCY [Sus scrofa]	22	22	28853000000	1260200000	1369000000	1524100000	1124400000	1257700000	1859200000	1423100000	1038700000	522590000	796420000	473080000	1193300000	547960000	1141800000	1305000000	886450000	1054100000	1283100000	1635000000	635400000	1028600000	1190400000	1045700000	1293600000	768910000	1195000000	1603400000	1544400000	1748600000	1478000000	1480500000	1733800000	1430100000	1308100000	1522300000	1360500000	1488900000	1347900000	1337600000	1336600000	1396800000	1343100000	1494600000
YWHAH	XP_001928111.1	XP_001928111.1	XP_001928111.1 14-3-3 protein eta GN=YWHAH [Sus scrofa]	15	15	28680000000	1183900000	1201700000	1538900000	1038100000	1061000000	1844500000	1236200000	1202000000	663860000	1167800000	436480000	1154600000	461950000	923400000	1675000000	1115500000	1120500000	1408500000	1230700000	581460000	1270600000	1238900000	1044900000	1031200000	620800000	1227900000	1518000000	1455700000	1472100000	1366700000	1389800000	1703100000	1365700000	1505500000	1525400000	1547100000	1239200000	1529100000	1363100000	1505100000	1407100000	1365600000	1702100000
CAND1	XP_003126410.2	XP_003126410.2	XP_003126410.2 LOW QUALITY PROTEIN: cullin-associated NEDD8-dissociated protein 1 GN=CAND1 [Sus scrofa]	54	56	28633000000	1282000000	1219000000	1765900000	1245000000	1246500000	1533800000	1359500000	1152500000	464880000	969190000	296610000	1205100000	367410000	1129100000	1634300000	886660000	874590000	1311800000	1508300000	609710000	1283900000	1240300000	1148600000	935810000	938520000	1024800000	1426900000	1497500000	1687600000	1441300000	1432800000	1487600000	1417600000	1455700000	1562800000	1452400000	1514500000	1470800000	1474300000	1368500000	1440000000	1344600000	1408000000
SERPINA1	NP_999560.2;NP_001335871.1;XP_020955327.1;XP_020955326.1;XP_020955325.1;CON__P34955;XP_020955324.1;XP_020955323.1	NP_999560.2;NP_001335871.1	NP_999560.2 alpha-1-antitrypsin precursor GN=SERPINA1 [Sus scrofa];NP_001335871.1 alpha-1-antitrypsin precursor GN=SERPINA1 [Sus scrofa]	20	20	28618000000	924860000	654490000	1080400000	1381500000	1665100000	1077100000	1294600000	1228200000	465910000	881120000	333170000	1491700000	1511200000	4496000000	888250000	752080000	892880000	866380000	768840000	1205800000	973590000	545870000	989470000	560360000	655000000	1034700000	1112200000	898430000	1138400000	1835300000	2023900000	1079200000	1391500000	1708800000	1474300000	1433700000	1381000000	1750100000	4016200000	4884100000	872710000	1165400000	1440400000
LOC100156470	XP_003483504.1;XP_020928114.1;XP_005670904.1;XP_020928115.1	XP_003483504.1;XP_020928114.1;XP_005670904.1;XP_020928115.1	XP_003483504.1 SEC14-like protein 3 isoform X1 GN=LOC100156470 [Sus scrofa];XP_020928114.1 SEC14-like protein 3 isoform X2 GN=LOC100156470 [Sus scrofa];XP_005670904.1 SEC14-like protein 3 isoform X2 GN=LOC100156470 [Sus scrofa];XP_020928115.1 SEC14-like pr	21	23	28603000000	1279900000	1300400000	1380500000	1379400000	1303100000	1948900000	1860600000	1168500000	502520000	1216400000	437590000	1098100000	356300000	812400000	1287000000	514000000	961740000	869300000	982070000	571750000	1757200000	1723300000	765920000	766710000	590750000	1768800000	1395600000	1476500000	1304400000	1615900000	1463300000	1772800000	1639000000	1491200000	1535500000	1659500000	1317700000	1264800000	1146600000	1073600000	1129800000	775900000	1252700000
STIP1	XP_003353842.1	XP_003353842.1	XP_003353842.1 stress-induced-phosphoprotein 1 GN=STIP1 [Sus scrofa]	27	27	28455000000	1483100000	1302000000	1565900000	1042900000	1104400000	1649600000	1242300000	1059800000	656130000	870290000	429770000	1137700000	466660000	910180000	1745800000	964260000	1126000000	1132200000	1424800000	410940000	1165000000	1385200000	1021700000	1094400000	1016400000	1047500000	1582500000	1542500000	1564900000	1312500000	1392400000	1561400000	1327900000	1585400000	1745100000	1366800000	1415000000	1492300000	1405100000	1362100000	1440800000	1426900000	1568600000
SEPTIN2	XP_020930257.1;XP_020930256.1;NP_001230722.1;XP_020930255.1;XP_020930254.1;XP_020930259.1	XP_020930257.1;XP_020930256.1;NP_001230722.1;XP_020930255.1;XP_020930254.1	XP_020930257.1 septin-2 isoform X2 GN=SEPTIN2 [Sus scrofa];XP_020930256.1 septin-2 isoform X2 GN=SEPTIN2 [Sus scrofa];NP_001230722.1 septin-2 GN=SEPTIN2 [Sus scrofa];XP_020930255.1 septin-2 isoform X1 GN=SEPTIN2 [Sus scrofa];XP_020930254.1 septin-2 isoform	20	20	28430000000	1115800000	969190000	1408400000	1227800000	1216800000	1584800000	1427200000	1203500000	571100000	848430000	478200000	1120600000	459920000	1099100000	1784900000	1090600000	822360000	1342600000	1348000000	538490000	1300400000	1250900000	1319000000	1117200000	706730000	1077800000	1328900000	1299900000	1598700000	1623600000	1549000000	1580900000	1487200000	1524800000	1473700000	1327500000	1385200000	1316600000	1354800000	1336200000	1584700000	1637600000	1372100000
PGM2	XP_003128958.1	XP_003128958.1	XP_003128958.1 phosphoglucomutase-2 GN=PGM2 [Sus scrofa]	33	33	28427000000	1483400000	1315300000	1789900000	1221500000	1367200000	1742800000	1326000000	1002200000	445820000	1319400000	406840000	1184500000	305910000	1076300000	1179800000	950820000	906440000	1102800000	1969800000	471600000	1100600000	1169200000	872970000	883410000	808600000	1023400000	1642400000	1586100000	1791900000	1430100000	1395300000	1485400000	1364500000	1344200000	1512900000	1907800000	1675700000	1381400000	1339900000	1211900000	1068600000	1003300000	1417300000
HNRNPH1	XP_020939989.1;XP_020939988.1;XP_020939987.1;XP_003123691.1;XP_020939985.1;XP_005654998.1;XP_005654997.1;XP_005654996.1;XP_020939991.1;XP_020939990.1;XP_020939986.1;XP_013842977.1;XP_013842975.1;XP_013842978.1;XP_013842976.1	XP_020939989.1;XP_020939988.1;XP_020939987.1;XP_003123691.1;XP_020939985.1;XP_005654998.1;XP_005654997.1;XP_005654996.1;XP_020939991.1;XP_020939990.1;XP_020939986.1;XP_013842977.1;XP_013842975.1;XP_013842978.1;XP_013842976.1	XP_020939989.1 heterogeneous nuclear ribonucleoprotein H isoform X7 GN=HNRNPH1 [Sus scrofa];XP_020939988.1 heterogeneous nuclear ribonucleoprotein H isoform X7 GN=HNRNPH1 [Sus scrofa];XP_020939987.1 heterogeneous nuclear ribonucleoprotein H isoform X7 GN=H	10	16	28385000000	1371400000	1171400000	1275000000	1395700000	1032800000	1537400000	1625800000	1265300000	537620000	790010000	449590000	1073400000	419280000	1017400000	2039100000	879040000	1104600000	1208100000	1314000000	698140000	1133100000	1252200000	995060000	927930000	594700000	1277300000	1449700000	1325200000	1231000000	1473200000	1185600000	1407100000	1612300000	1562900000	1533500000	1249200000	1387000000	1234800000	1253700000	1428100000	1658600000	1258700000	1508000000
PRDX5	NP_999309.1	NP_999309.1	NP_999309.1 peroxiredoxin-5, mitochondrial GN=PRDX5 [Sus scrofa]	14	14	28146000000	1766600000	954980000	1252400000	1295100000	1537100000	1676900000	1000100000	972220000	623480000	770230000	443770000	1301700000	488240000	685890000	1529000000	1114600000	760190000	1226200000	1280600000	572350000	1310000000	1670200000	743170000	1092400000	786770000	1292100000	1764900000	1361500000	1577400000	1367200000	1539800000	1919000000	1275700000	1486300000	1617700000	1277900000	1404400000	1615200000	1472900000	1244700000	1303100000	1593900000	1217000000
PSME1	NP_999469.1	NP_999469.1	NP_999469.1 proteasome activator complex subunit 1 GN=PSME1 [Sus scrofa]	13	14	28110000000	1758600000	1428300000	1465100000	1161800000	1119600000	1376300000	1573200000	1131800000	615460000	1073600000	486620000	1266100000	549510000	968840000	1337500000	719800000	833530000	834740000	1441400000	592950000	1224600000	1294000000	659040000	893120000	1022700000	1282200000	1858900000	1703700000	1439300000	1437000000	1310900000	1445700000	1461900000	1462200000	1726200000	1796300000	2086100000	1568300000	1604800000	1352100000	1267400000	1195800000	1182200000
RPS12	NP_999528.1	NP_999528.1	NP_999528.1 40S ribosomal protein S12 GN=RPS12 [Sus scrofa]	9	9	27818000000	1433400000	1166000000	973400000	1087200000	887840000	1501200000	1302700000	1307100000	576280000	1113500000	403740000	1012700000	400320000	1242400000	1775700000	926780000	921050000	1125000000	1308600000	716720000	1212400000	1522100000	1203400000	878370000	767420000	1052500000	1871600000	1399500000	1000100000	1353700000	1197000000	1607400000	1453200000	1883600000	1342500000	1453600000	929820000	1410300000	1194000000	1635900000	1794400000	1377400000	1460800000
HADHA	NP_999127.1	NP_999127.1	NP_999127.1 trifunctional enzyme subunit alpha, mitochondrial GN=HADHA [Sus scrofa]	31	31	27807000000	1115700000	1385400000	1605500000	1149600000	1353200000	1509700000	1243500000	944270000	429440000	788600000	411080000	1142700000	437660000	944780000	1591200000	826690000	937100000	1554100000	1423600000	659120000	1396600000	860420000	1247300000	847720000	889170000	1112600000	1183100000	1553000000	1631900000	1326200000	1405000000	1302500000	1250300000	1316400000	1260900000	1386000000	1623300000	1425800000	1330500000	1263400000	1426400000	1319200000	1376300000
MATR3	XP_013850634.1;XP_020940516.1;XP_020940506.1;XP_020940507.1;XP_020940514.1;XP_020940518.1;XP_005661770.1;XP_020940509.1;XP_020940508.1;XP_020940517.1;XP_020940515.1;XP_005661767.1;XP_020940513.1;XP_005661764.1;XP_005661765.1;XP_005661766.1;XP_005661768.1;XP_020940510.1;XP_013850633.1;XP_020940512.1;XP_020940511.1;XP_020940523.1;XP_020940519.1;XP_020940521.1;XP_020940524.1;XP_020940522.1;XP_020940…	XP_013850634.1;XP_020940516.1;XP_020940506.1;XP_020940507.1;XP_020940514.1;XP_020940518.1;XP_005661770.1;XP_020940509.1;XP_020940508.1;XP_020940517.1;XP_020940515.1;XP_005661767.1;XP_020940513.1;XP_005661764.1;XP_005661765.1;XP_005661766.1;XP_005661768.1;XP_020940510.1;XP_013850633.1;XP_020940512.1;XP_020940511.1	XP_013850634.1 matrin-3 isoform X4 GN=MATR3 [Sus scrofa];XP_020940516.1 matrin-3 isoform X4 GN=MATR3 [Sus scrofa];XP_020940506.1 matrin-3 isoform X2 GN=MATR3 [Sus scrofa];XP_020940507.1 matrin-3 isoform X2 GN=MATR3 [Sus scrofa];XP_020940514.1 matrin-3 isof	30	30	27611000000	1306300000	1224000000	1515000000	1131300000	1038800000	1628300000	1344600000	1045700000	444920000	882230000	321830000	1014900000	351920000	1117400000	1925800000	908610000	928380000	1224800000	1187800000	659290000	1375500000	1186200000	1013400000	982390000	822250000	1029900000	1394200000	1376400000	1554700000	1437400000	1284000000	1481400000	1408200000	1503600000	1372800000	1322300000	1189600000	1429700000	1341300000	1560100000	1584400000	1347700000	1412600000
ST13	XP_003481579.1	XP_003481579.1	XP_003481579.1 hsc70-interacting protein GN=ST13 [Sus scrofa]	12	12	27442000000	1307700000	1146700000	1323900000	1075300000	1171500000	1488100000	1323800000	1162100000	588280000	646260000	438710000	1104700000	471100000	923220000	1456400000	1003000000	977430000	1321300000	1304900000	574860000	1194700000	1379400000	1104700000	1275100000	730240000	948600000	1574500000	1423200000	1571100000	1353200000	1430100000	1441400000	1366800000	1526900000	1589800000	1314800000	1437400000	1483500000	1476300000	1315600000	1308300000	1571900000	1553400000
CTNNB1	XP_020924225.1;XP_020924224.1;XP_020924223.1;XP_013836946.1;XP_005669434.1;NP_999532.1	XP_020924225.1;XP_020924224.1;XP_020924223.1;XP_013836946.1;XP_005669434.1;NP_999532.1	XP_020924225.1 catenin beta-1 isoform X1 GN=CTNNB1 [Sus scrofa];XP_020924224.1 catenin beta-1 isoform X1 GN=CTNNB1 [Sus scrofa];XP_020924223.1 catenin beta-1 isoform X1 GN=CTNNB1 [Sus scrofa];XP_013836946.1 catenin beta-1 isoform X1 GN=CTNNB1 [Sus scrofa];	31	31	27384000000	1016300000	1510400000	1448900000	887110000	1111100000	1310600000	1592800000	782870000	443090000	1005400000	385130000	1223500000	293580000	595490000	1599200000	978670000	1412300000	1500100000	1028700000	625300000	1179500000	1442400000	1084900000	1030400000	543490000	1353100000	1066400000	1597700000	1267500000	1158000000	1249200000	1340800000	1537000000	1337700000	1684300000	1422000000	1624000000	1426400000	1299400000	1258400000	1521300000	1261700000	1460800000
RHOC	XP_003125894.1;XP_020946420.1	XP_003125894.1;XP_020946420.1	XP_003125894.1 rho-related GTP-binding protein RhoC isoform X2 GN=RHOC [Sus scrofa];XP_020946420.1 rho-related GTP-binding protein RhoC isoform X1 GN=RHOC [Sus scrofa]	3	12	27375000000	1251200000	1369200000	1113600000	1029600000	1154700000	1715400000	1897700000	895660000	402690000	1143400000	471520000	1169600000	468020000	958270000	1424300000	763080000	851110000	1108600000	1219600000	531090000	1577400000	1178900000	1005900000	630650000	670580000	1373000000	1313600000	1809100000	1205800000	1436500000	1448400000	1642100000	1832800000	1063100000	1365100000	1584500000	1889600000	1364300000	1547300000	1262100000	1316500000	1119500000	1346200000
RNH1	XP_020938202.1;XP_020938201.1;XP_020938200.1;XP_020938199.1;XP_020938198.1	XP_020938202.1;XP_020938201.1;XP_020938200.1;XP_020938199.1;XP_020938198.1	XP_020938202.1 ribonuclease inhibitor isoform X3 GN=RNH1 [Sus scrofa];XP_020938201.1 ribonuclease inhibitor isoform X3 GN=RNH1 [Sus scrofa];XP_020938200.1 ribonuclease inhibitor isoform X3 GN=RNH1 [Sus scrofa];XP_020938199.1 ribonuclease inhibitor isoform	22	22	27203000000	1504200000	1044500000	955510000	1171200000	1131400000	1547500000	1616400000	1160100000	505650000	1008800000	329100000	1062600000	429880000	1084600000	1582700000	714100000	971580000	1216500000	1590800000	553440000	1093100000	1116500000	1081200000	959350000	755820000	1017000000	1603000000	1353500000	941120000	1429600000	1465600000	1588500000	1557100000	1557700000	1412400000	1512100000	1076500000	1330400000	1274600000	1433100000	1426000000	1119600000	1520400000
LGALS3	XP_005660031.1;NP_001090970.1	XP_005660031.1;NP_001090970.1	XP_005660031.1 galectin-3 isoform X1 GN=LGALS3 [Sus scrofa];NP_001090970.1 galectin-3 GN=LGALS3 [Sus scrofa]	11	11	27099000000	1334800000	1479800000	2218300000	1192500000	1277400000	2153800000	1124900000	890560000	351840000	845510000	440650000	1296800000	395730000	748790000	1259700000	901170000	872550000	1152100000	963530000	508520000	986470000	960250000	1073400000	1100100000	548950000	1021200000	1484700000	1811200000	2274800000	1246600000	1478100000	2027100000	1174400000	1233600000	1280300000	1319900000	1370400000	1647000000	1220700000	1028400000	1213800000	1183800000	1257100000
HNRNPC	XP_020953924.1;XP_020953908.1;XP_020953916.1;XP_020953914.1;XP_020953913.1;XP_020953912.1;XP_020953915.1;XP_020953910.1;XP_020953909.1;XP_020953907.1;XP_020953922.1;XP_020953911.1;XP_020953923.1;XP_020953917.1;XP_020953918.1;XP_020953919.1;XP_020953920.1;XP_020953921.1;NP_001230623.1	XP_020953924.1;XP_020953908.1;XP_020953916.1;XP_020953914.1;XP_020953913.1;XP_020953912.1;XP_020953915.1;XP_020953910.1;XP_020953909.1;XP_020953907.1;XP_020953922.1;XP_020953911.1;XP_020953923.1;XP_020953917.1;XP_020953918.1;XP_020953919.1;XP_020953920.1;XP_020953921.1;NP_001230623.1	XP_020953924.1 heterogeneous nuclear ribonucleoproteins C1/C2 isoform X4 GN=HNRNPC [Sus scrofa];XP_020953908.1 heterogeneous nuclear ribonucleoproteins C1/C2 isoform X3 GN=HNRNPC [Sus scrofa];XP_020953916.1 heterogeneous nuclear ribonucleoproteins C1/C2 is	3	16	27048000000	1042600000	1297400000	1390100000	878520000	1041600000	1339300000	1106700000	888710000	580170000	922440000	555190000	986310000	619140000	848970000	1546400000	1133700000	1139700000	1213000000	1417300000	733520000	1097800000	987540000	1076500000	1051200000	1028200000	1126100000	1408500000	1379100000	1614400000	1293800000	1134400000	1464800000	1331700000	1402400000	1457300000	1335700000	1646600000	1388500000	1541200000	1326400000	1575000000	1402400000	1373600000
CNN2	XP_003354007.2	XP_003354007.2	XP_003354007.2 LOW QUALITY PROTEIN: calponin-2 GN=CNN2 [Sus scrofa]	13	13	26542000000	996430000	1018300000	1243200000	942490000	883940000	1515700000	1365000000	1219700000	600880000	1003600000	436380000	841730000	482680000	896390000	2235700000	832240000	904660000	1467000000	1041500000	701680000	1221400000	1179700000	926000000	908660000	646460000	1030800000	1251500000	1224400000	1383400000	1375000000	1206700000	1499400000	1560500000	1521200000	1267600000	1337400000	1013500000	1129800000	1107800000	1271900000	1891000000	1287000000	1210000000
VWF	XP_020946855.1	XP_020946855.1	XP_020946855.1 von Willebrand factor isoform X1 GN=VWF [Sus scrofa]	1	97	26426000000	1508500000	709720000	1714000000	1323400000	1321800000	1458600000	1367400000	1341100000	505240000	721010000	330150000	1663900000	623320000	1170300000	1252200000	1234900000	707990000	1659800000	1160100000	316240000	781020000	938940000	1024000000	648400000	356080000	588230000	1418900000	928970000	1815800000	1473700000	1421700000	1340300000	1258600000	1608600000	1349800000	1255800000	1301800000	1705600000	1751400000	1548700000	1087000000	1623400000	1191400000
CKAP4	NP_001231560.1	NP_001231560.1	NP_001231560.1 cytoskeleton-associated protein 4 GN=CKAP4 [Sus scrofa]	30	30	26360000000	791090000	1008900000	1610800000	736710000	768840000	1140900000	1152700000	946850000	448810000	984240000	484070000	937450000	547720000	706150000	2303500000	1265200000	758230000	1389100000	1140400000	735440000	1416800000	1140800000	1193800000	415870000	1188600000	1146500000	856090000	1379800000	1682500000	992550000	991150000	1196800000	1211000000	1177600000	1417100000	1307900000	1601900000	1205900000	1555900000	1103300000	1899800000	1605100000	1217700000
KPNB1	XP_003131576.3	XP_003131576.3	XP_003131576.3 importin subunit beta-1 GN=KPNB1 [Sus scrofa]	49	49	26337000000	1278000000	1137900000	1441600000	1113100000	1028200000	1484900000	1589400000	1122200000	452600000	832760000	323050000	1055200000	341300000	1195100000	1531400000	1020200000	829010000	1162700000	1395500000	576800000	1313000000	972620000	830160000	696620000	701560000	912250000	1394000000	1310900000	1519900000	1178800000	1196800000	1290200000	1475000000	1391400000	1113600000	1295200000	1221500000	1181800000	1314100000	1413600000	1194600000	1060600000	1225100000
CCT4	XP_003125148.1	XP_003125148.1	XP_003125148.1 T-complex protein 1 subunit delta GN=CCT4 [Sus scrofa]	25	25	26330000000	1247200000	1140200000	1255400000	1023500000	1084100000	1170000000	1246000000	1229300000	531560000	967770000	374920000	958600000	417000000	989570000	1496800000	820310000	973640000	1227000000	1309300000	508860000	1246200000	1193300000	1137100000	962860000	877170000	941780000	1420500000	1416300000	1374500000	1236100000	1158300000	1250500000	1248800000	1612500000	1673900000	1445600000	1373500000	1219200000	1375000000	1191200000	1393800000	1299100000	1350300000
RPN1	NP_999498.1	NP_999498.1	NP_999498.1 dolichyl-diphosphooligosaccharide--protein glycosyltransferase subunit 1 precursor GN=RPN1 [Sus scrofa]	27	27	26325000000	798940000	1065000000	1317300000	796940000	958120000	1518100000	1413300000	1141000000	541310000	888800000	529610000	1391800000	471380000	1120400000	1548600000	813820000	737440000	1183300000	1031100000	566720000	1490100000	1032400000	1056000000	638840000	1056700000	1218300000	953820000	1283800000	1348600000	1019800000	1089200000	1267400000	1294100000	1232800000	1517300000	1246000000	1530000000	1474300000	1479500000	1278400000	1306300000	1194300000	1141400000
SERPINB9	NP_001104726.1	NP_001104726.1	NP_001104726.1 serpin B9 GN=SERPINB9 [Sus scrofa]	28	30	26264000000	1718900000	1296800000	1132400000	1244700000	1039300000	1543100000	1635200000	880830000	413130000	1275300000	498040000	1528400000	382450000	831620000	1137500000	631380000	686910000	811980000	1315100000	370580000	1445800000	1230800000	704290000	697090000	838110000	974240000	1792700000	1539200000	1286100000	1509200000	1239600000	1402200000	1490000000	1252000000	1507200000	1794400000	1913800000	1553000000	1352000000	1236500000	893810000	925650000	1133100000
RSU1	XP_020920488.1;XP_020920486.1;XP_020920487.1	XP_020920488.1;XP_020920486.1;XP_020920487.1	XP_020920488.1 ras suppressor protein 1 isoform X3 GN=RSU1 [Sus scrofa];XP_020920486.1 ras suppressor protein 1 isoform X1 GN=RSU1 [Sus scrofa];XP_020920487.1 ras suppressor protein 1 isoform X2 GN=RSU1 [Sus scrofa]	13	13	26263000000	1185600000	1033400000	1563400000	893940000	1061000000	1441000000	1596300000	803740000	274280000	697050000	327180000	1204400000	220350000	845140000	1383700000	1048800000	718870000	1775800000	1644700000	740560000	1677100000	776330000	1274100000	720070000	715090000	641150000	1291100000	1243700000	1470600000	1338800000	1426100000	1315600000	1265000000	1034500000	1066200000	1014600000	1502500000	1264300000	1409900000	1057400000	1511100000	1453900000	1245800000
TPPP3	XP_020949745.1;XP_013853721.1;XP_003126976.1;XP_003126975.1	XP_020949745.1;XP_013853721.1;XP_003126976.1;XP_003126975.1	XP_020949745.1 tubulin polymerization-promoting protein family member 3 GN=TPPP3 [Sus scrofa];XP_013853721.1 tubulin polymerization-promoting protein family member 3 GN=TPPP3 [Sus scrofa];XP_003126976.1 tubulin polymerization-promoting protein family membe	11	11	26146000000	809410000	1156900000	1581200000	1420100000	1326200000	1471500000	1389400000	969050000	537770000	1043700000	530830000	1597000000	416280000	1186800000	1608400000	463430000	936050000	630210000	522170000	426740000	1241500000	1162800000	892740000	1095800000	608020000	1122000000	1079300000	1485200000	1673900000	1779000000	1620900000	1586700000	1484900000	1310700000	1508500000	1524200000	1813000000	2107100000	1271100000	1618400000	1498300000	707400000	1404100000
LMNB2	XP_003354039.2	XP_003354039.2	XP_003354039.2 lamin-B2 GN=LMNB2 [Sus scrofa]	35	35	26139000000	1392700000	1021400000	1651100000	1295000000	1065100000	1650300000	1343400000	864880000	374390000	630290000	412400000	1096200000	349240000	972020000	1470900000	782320000	1007500000	1308400000	1372500000	338530000	1059900000	957840000	1041100000	1173600000	614230000	893850000	1573400000	1164100000	1660700000	1534300000	1373900000	1531400000	1383400000	1253200000	1178900000	1147800000	1345200000	1254600000	1166900000	1347300000	1307500000	1196100000	1524500000
EIF5A	XP_020923476.1;XP_013843405.1;XP_003131980.1;XP_003131979.1;XP_020925458.1;XP_020925457.1;XP_020923474.1	XP_020923476.1;XP_013843405.1;XP_003131980.1;XP_003131979.1	XP_020923476.1 eukaryotic translation initiation factor 5A-1 isoform X2 GN=EIF5A [Sus scrofa];XP_013843405.1 eukaryotic translation initiation factor 5A-1 isoform X2 GN=EIF5A [Sus scrofa];XP_003131980.1 eukaryotic translation initiation factor 5A-1 isoform	12	12	26056000000	1498500000	1085300000	1154100000	1166400000	1019400000	1599000000	1371200000	1224200000	418500000	1108000000	316460000	999160000	407940000	988660000	1850200000	730600000	728360000	1035500000	1230600000	485530000	1238100000	1074900000	840290000	692500000	740370000	1052100000	1685800000	1329700000	1168600000	1447800000	1278600000	1464700000	1445800000	1691500000	1142800000	1515300000	1022400000	1241600000	1086600000	1458900000	1445900000	1289200000	1207500000
SNX17	XP_020943348.1	XP_020943348.1	XP_020943348.1 LOW QUALITY PROTEIN: sorting nexin-17 GN=SNX17 [Sus scrofa]	9	9	26046000000	1579000000	999770000	1190100000	1134200000	1526000000	1268400000	1869700000	5756500	3630700	9414900	13006000	10430000	972530000	62822000	671460000	10660000000	1651400000	594250000	1368000000	4899000	14203000	17304000	12812000	383690000	15184000	7687100	0	1474700000	1853500000	0	0	1745700000	2515000000	0	0	1896600000	2568500000	1687100000	2244000000	885330000	1694800000	1745700000	0
AKR1B1	NP_001001539.1;XP_020934157.1;XP_020934156.1;XP_020919735.1;XP_020919734.1;XP_013835806.1;XP_013835805.1;NP_001038033.2	NP_001001539.1;XP_020934157.1;XP_020934156.1	NP_001001539.1 aldo-keto reductase family 1 member B1 GN=AKR1B1 [Sus scrofa];XP_020934157.1 aldose reductase isoform X1 GN=AKR1B1 [Sus scrofa];XP_020934156.1 aldose reductase isoform X1 GN=AKR1B1 [Sus scrofa]	14	14	26028000000	1313900000	1072100000	1690900000	1179100000	1080600000	2015500000	1632800000	1046100000	387470000	889930000	401230000	1003500000	373030000	871430000	1587500000	803420000	676780000	903910000	1129200000	476400000	1353000000	1030800000	824020000	913760000	573780000	798210000	1442700000	1205400000	1813100000	1375400000	1196800000	1743200000	1563300000	1374800000	1192100000	1463300000	1326600000	1276100000	1274400000	1349700000	1343800000	1084600000	1154300000
SOD2	NP_999292.2	NP_999292.2	NP_999292.2 superoxide dismutase , mitochondrial GN=SOD2 [Sus scrofa]	11	11	25978000000	1881900000	1208800000	1678500000	962310000	1301800000	1393000000	1084000000	716220000	289510000	916160000	279200000	1221600000	300870000	507280000	1185400000	937900000	743910000	1264800000	2812500000	404000000	840930000	906690000	706140000	742430000	946830000	745340000	1822400000	1382400000	1722900000	1084100000	1423500000	1254200000	1006900000	1113100000	1057800000	1603800000	1119800000	1344000000	985300000	1024100000	973970000	1410100000	987180000
PARVA	XP_020938970.1;XP_013840602.1	XP_020938970.1	XP_020938970.1 LOW QUALITY PROTEIN: alpha-parvin GN=PARVA [Sus scrofa]	16	18	25629000000	1181200000	973230000	1165100000	998330000	1263100000	1294000000	1086400000	895490000	574550000	814720000	435810000	1058000000	421350000	983230000	1396800000	852590000	822270000	1212500000	1241600000	618550000	1336800000	1141300000	1048800000	1078300000	797080000	938110000	1287400000	1200700000	1311300000	1257900000	1450000000	1277900000	1189200000	1404600000	1700900000	1167400000	1582000000	1337900000	1268500000	1197500000	1298500000	1204400000	1237100000
AKR1C4	NP_001033715.2;XP_020919738.1;XP_020919737.1;XP_013835808.1;XP_005668293.1;XP_005668289.1;XP_005668288.1;XP_005668287.1;NP_001038083.1	NP_001033715.2	NP_001033715.2 aldo-keto reductase family 1, member C-like 1 GN=AKR1C4 [Sus scrofa]	11	23	25427000000	1894400000	846500000	978210000	695080000	1207000000	1549400000	1037100000	934100000	417740000	938580000	238350000	1467700000	343900000	549050000	1366300000	713210000	726160000	1303000000	1563000000	296720000	1046000000	915290000	1010600000	1822100000	937670000	629690000	1912600000	1044600000	1094600000	767680000	1453500000	1405000000	995890000	1217700000	1021100000	1247200000	857920000	1757400000	1162900000	793050000	1101100000	1168400000	1054100000
CCT6A	XP_005662075.1;XP_005674660.3	XP_005662075.1	XP_005662075.1 T-complex protein 1 subunit zeta GN=CCT6A [Sus scrofa]	27	27	25404000000	1186900000	920970000	1272600000	899660000	779640000	1210700000	1072300000	1111400000	574700000	943550000	324800000	1017800000	367450000	984270000	1668100000	929590000	725580000	1036300000	1083600000	599860000	1243700000	1288700000	1227300000	984360000	877070000	1073300000	1390700000	1268400000	1469300000	1225600000	1098700000	1274300000	1228500000	1391100000	1451500000	1265400000	1248200000	1349200000	1236200000	1246000000	1483000000	1532600000	1208500000
AGRN	XP_020950836.1;XP_020950837.1	XP_020950836.1;XP_020950837.1	XP_020950836.1 agrin isoform X1 GN=AGRN [Sus scrofa];XP_020950837.1 agrin isoform X2 GN=AGRN [Sus scrofa]	62	62	25379000000	994030000	1206000000	802610000	907410000	1074300000	1706000000	1955200000	929280000	377100000	775270000	292180000	1188400000	191530000	468980000	2389800000	467320000	640870000	1206100000	1242100000	692680000	1203900000	1169400000	785730000	842480000	343610000	1526300000	980110000	1283900000	993730000	1097700000	1279500000	1440600000	1538700000	1143100000	1160400000	1176100000	1156200000	1348900000	1019000000	768190000	1664500000	857160000	1060000000
NUMA1	XP_020918084.1;XP_005653725.1;XP_005653724.1;XP_005653723.1;XP_005653722.1;XP_005653721.1;XP_020918085.1;XP_013854694.1	XP_020918084.1;XP_005653725.1;XP_005653724.1;XP_005653723.1;XP_005653722.1;XP_005653721.1;XP_020918085.1;XP_013854694.1	XP_020918084.1 nuclear mitotic apparatus protein 1 isoform X1 GN=NUMA1 [Sus scrofa];XP_005653725.1 nuclear mitotic apparatus protein 1 isoform X1 GN=NUMA1 [Sus scrofa];XP_005653724.1 nuclear mitotic apparatus protein 1 isoform X1 GN=NUMA1 [Sus scrofa];XP_0	81	81	25306000000	1099300000	1096300000	1491400000	1171900000	848660000	1782200000	1366100000	981290000	437640000	874800000	305190000	847280000	289190000	799480000	2043000000	825970000	896070000	1216500000	1149800000	363150000	1095900000	1011300000	856800000	859550000	637380000	959720000	1158400000	1121100000	1505100000	1362800000	1209500000	1394000000	1259100000	1208700000	1215100000	1176900000	1291300000	1241600000	1247300000	1335100000	1476000000	1156500000	1304600000
COL6A6	XP_020926990.1	XP_020926990.1	XP_020926990.1 LOW QUALITY PROTEIN: collagen alpha-6(VI) chain GN=COL6A6 [Sus scrofa]	61	63	25055000000	509280000	825510000	1326400000	1057800000	2518800000	1315200000	1168400000	537350000	169650000	447170000	257070000	2003300000	737900000	1180400000	1681200000	1305300000	524730000	1301000000	562890000	486690000	2261600000	135630000	1404600000	263780000	225800000	847330000	626670000	998240000	1326800000	1208100000	2638600000	965410000	1144700000	858650000	736180000	833600000	1051300000	2241900000	2101500000	1533400000	1390800000	1554800000	829230000
H1-2	NP_001020387.1;XP_020954089.1	NP_001020387.1	NP_001020387.1 histone H1.2 GN=H1-2 [Sus scrofa]	1	7	24927000000	953920000	751800000	904190000	1465500000	923950000	389210000	380530000	1882600000	865590000	522650000	303440000	1187500000	494580000	660980000	482630000	1334500000	3132700000	2844400000	910750000	126520000	814540000	808810000	980670000	404080000	440950000	960470000	1066700000	972450000	951640000	1651300000	1108700000	536280000	544620000	1904100000	1940700000	700350000	985730000	1409600000	1475100000	838720000	414560000	1826700000	4702000000
EEF1D	XP_020946118.1;XP_020946119.1;XP_020946117.1	XP_020946118.1;XP_020946119.1;XP_020946117.1	XP_020946118.1 elongation factor 1-delta isoform X2 GN=EEF1D [Sus scrofa];XP_020946119.1 elongation factor 1-delta isoform X2 GN=EEF1D [Sus scrofa];XP_020946117.1 elongation factor 1-delta isoform X1 GN=EEF1D [Sus scrofa]	13	15	24922000000	1286700000	1039800000	1488000000	1086500000	896050000	1432100000	1084200000	953000000	352010000	820090000	335810000	828690000	362200000	805860000	1740900000	977250000	799650000	1180400000	1298100000	562210000	1051300000	1136800000	867020000	741530000	717270000	1078800000	1443700000	1269100000	1595300000	1305100000	1114500000	1363100000	1157000000	1271500000	1352700000	1165900000	1150100000	1076600000	1158900000	1163000000	1537000000	1483800000	1175600000
PABPC1	XP_001927782.1;XP_005674625.2	XP_001927782.1	XP_001927782.1 polyadenylate-binding protein 1 GN=PABPC1 [Sus scrofa]	18	28	24352000000	1127000000	1187400000	1581000000	1026300000	823950000	1167200000	1203100000	765540000	384380000	649160000	336730000	936120000	368210000	988180000	1662200000	946650000	636420000	1114700000	1091800000	569410000	1234200000	1152600000	909650000	542090000	766660000	1180900000	1276600000	1304300000	1468200000	1173600000	1064500000	1089500000	1223200000	1126900000	1288600000	1165400000	1363500000	1252300000	1234700000	1181700000	1378700000	1377400000	1063900000
SQOR	XP_020947945.1;XP_020947804.1;XP_020947727.1;XP_020947661.1;XP_020947618.1;XP_020947564.1;XP_020947489.1;XP_005659694.2;NP_001231167.1	XP_020947945.1;XP_020947804.1;XP_020947727.1;XP_020947661.1;XP_020947618.1;XP_020947564.1;XP_020947489.1;XP_005659694.2;NP_001231167.1	XP_020947945.1 sulfide:quinone oxidoreductase, mitochondrial isoform X1 GN=SQOR [Sus scrofa];XP_020947804.1 sulfide:quinone oxidoreductase, mitochondrial isoform X1 GN=SQOR [Sus scrofa];XP_020947727.1 sulfide:quinone oxidoreductase, mitochondrial isoform X	30	30	24239000000	1113000000	1247500000	1193400000	866830000	1097500000	1426800000	1108800000	737010000	401310000	824050000	433470000	1205800000	337900000	663640000	1282900000	696230000	852410000	1089100000	1193800000	295430000	1016600000	1205400000	1085800000	876520000	999400000	988570000	1159800000	1356800000	1251700000	1035300000	1314200000	1238800000	1057400000	980970000	1199400000	1279600000	1545300000	1475300000	1214100000	955700000	1128500000	1058100000	1195400000
CAPN1	XP_005660759.1;NP_001335713.1	XP_005660759.1;NP_001335713.1	XP_005660759.1 calpain-1 catalytic subunit isoform X1 GN=CAPN1 [Sus scrofa];NP_001335713.1 calpain-1 catalytic subunit GN=CAPN1 [Sus scrofa]	47	47	24160000000	1191600000	907300000	1202600000	1094500000	1123400000	1485400000	1270400000	965140000	432080000	819750000	342830000	1047300000	385880000	1032300000	1377600000	657600000	685900000	1048600000	1143400000	483220000	1176500000	902640000	897930000	795670000	710170000	980740000	1345000000	1228900000	1284100000	1377700000	1282800000	1424800000	1248800000	1241500000	1293000000	1261800000	1255200000	1279200000	1304300000	1295800000	1215200000	1036700000	1077200000
RRBP1	XP_020933696.1;XP_020933695.1	XP_020933696.1;XP_020933695.1	XP_020933696.1 ribosome-binding protein 1 isoform X2 GN=RRBP1 [Sus scrofa];XP_020933695.1 ribosome-binding protein 1 isoform X1 GN=RRBP1 [Sus scrofa]	35	35	23706000000	1187000000	1067800000	1271200000	1251100000	975810000	763450000	581540000	511620000	553210000	401720000	561350000	1097000000	493170000	981640000	2122700000	1105900000	865040000	673670000	1051700000	209500000	1548500000	1233300000	1245800000	195990000	392130000	1363600000	1052500000	1141900000	1266500000	1209300000	961270000	1024200000	1136600000	1180000000	1425900000	1036900000	1581400000	1028200000	1312800000	982950000	1506200000	1504900000	1102200000
GPX1	NP_999366.1	NP_999366.1	NP_999366.1 glutathione peroxidase 1 GN=GPX1 [Sus scrofa]	15	15	23547000000	2015200000	1441800000	1388900000	1003100000	1276400000	1188400000	1073000000	831110000	331770000	819520000	359690000	1181200000	297400000	620720000	524190000	744600000	988900000	1064600000	1371600000	503750000	582900000	860950000	825940000	744810000	700090000	806480000	2158700000	1792800000	1480200000	1192700000	1498700000	1151500000	1117400000	1118400000	1466800000	1315800000	1317100000	1424600000	969940000	868760000	536200000	1070600000	1366700000
DYNLL2	XP_020922930.1;XP_003131683.1	XP_020922930.1;XP_003131683.1	XP_020922930.1 dynein light chain 2, cytoplasmic GN=DYNLL2 [Sus scrofa];XP_003131683.1 dynein light chain 2, cytoplasmic GN=DYNLL2 [Sus scrofa]	3	6	23522000000	1456200000	828700000	781270000	942680000	1055200000	1741200000	1416900000	1046100000	485780000	901410000	342470000	951630000	349130000	961140000	1671700000	352130000	809930000	652160000	997780000	414040000	690910000	1193200000	804540000	1074900000	572030000	1028900000	1622100000	959260000	628340000	1060000000	1263800000	1691000000	1600300000	1474400000	1154900000	1237000000	882400000	1334600000	954220000	1411300000	1437900000	584260000	1383900000
RPLP0	NP_001092068.1	NP_001092068.1	NP_001092068.1 60S acidic ribosomal protein P0 GN=RPLP0 [Sus scrofa]	16	16	23499000000	1257600000	967640000	1178300000	874380000	784460000	1282100000	1143000000	963650000	477810000	807030000	382870000	805380000	432990000	698000000	1403200000	801440000	744140000	1030600000	1238200000	753750000	1041900000	1084100000	842840000	694640000	791390000	1017900000	1430500000	1156800000	1291100000	1088500000	959960000	1223900000	1282600000	1307500000	1353000000	1221100000	1238500000	1082500000	1269600000	1160900000	1254000000	1150600000	1153000000
HNRNPR	XP_020951173.1;XP_020951172.1;XP_020951171.1;XP_020951175.1	XP_020951173.1;XP_020951172.1;XP_020951171.1;XP_020951175.1	XP_020951173.1 heterogeneous nuclear ribonucleoprotein R isoform X2 GN=HNRNPR [Sus scrofa];XP_020951172.1 heterogeneous nuclear ribonucleoprotein R isoform X2 GN=HNRNPR [Sus scrofa];XP_020951171.1 heterogeneous nuclear ribonucleoprotein R isoform X2 GN=HNR	1	25	23391000000	859280000	917130000	1173700000	892900000	931350000	1378900000	1276500000	925500000	443090000	762410000	467300000	896550000	453150000	816520000	1567300000	715250000	804600000	1013400000	1036400000	368250000	1266000000	1004200000	1025700000	553320000	722200000	1120200000	1051800000	1180800000	1287200000	1139800000	1134400000	1270300000	1188900000	1315800000	1280400000	1227300000	1438000000	1142500000	1369200000	1095300000	1313900000	1141800000	1165000000
ACLY	XP_020921685.1;XP_020921684.1;XP_020921687.1;XP_020921686.1;NP_001244205.1;NP_001098772.1	XP_020921685.1;XP_020921684.1;XP_020921687.1;XP_020921686.1;NP_001244205.1;NP_001098772.1	XP_020921685.1 ATP-citrate synthase isoform X1 GN=ACLY [Sus scrofa];XP_020921684.1 ATP-citrate synthase isoform X1 GN=ACLY [Sus scrofa];XP_020921687.1 ATP-citrate synthase isoform X2 GN=ACLY [Sus scrofa];XP_020921686.1 ATP-citrate synthase isoform X2 GN=AC	47	47	23283000000	1033400000	1083800000	1179800000	2115100000	837980000	1231000000	1031000000	810880000	365280000	451310000	373260000	686380000	301370000	613610000	1747700000	889210000	622450000	1059800000	1091800000	406080000	1111900000	818760000	913560000	958170000	563260000	986120000	1166800000	1276800000	1102600000	1196900000	1032200000	1123000000	1116700000	1192300000	1310100000	1030400000	1326900000	1036400000	1468200000	1095100000	1268400000	1239800000	1148900000
TPM2	NP_001123419.1	NP_001123419.1	NP_001123419.1 tropomyosin beta chain GN=TPM2 [Sus scrofa]	0	3	23222000000	1116200000	1290700000	1677500000	1410300000	1417700000	1523100000	1242500000	421220000	78616000	279250000	43559000	763220000	72651000	673440000	2145300000	1687000000	589340000	1747600000	1235800000	388180000	1741900000	182890000	1107800000	74358000	109050000	202910000	1392100000	1488900000	1357300000	1663100000	1163900000	1457700000	1433200000	1106700000	574790000	885480000	213190000	1319400000	408910000	1194000000	1438700000	1150200000	1040500000
INMT	NP_001231662.1	NP_001231662.1	NP_001231662.1 indolethylamine N-methyltransferase GN=INMT [Sus scrofa]	14	14	23100000000	542960000	1172700000	1252200000	1473500000	480620000	2359100000	815820000	800770000	450380000	1149900000	567110000	372070000	560540000	634720000	586150000	702160000	1139800000	1427700000	985950000	334610000	609140000	1198000000	1367200000	1289900000	427570000	399170000	674300000	1516000000	1311800000	1871700000	578070000	2370400000	900750000	1120900000	1385700000	1833200000	1968600000	493290000	1788900000	1072400000	542490000	996530000	1650600000
TSNAX	NP_001230536.1	NP_001230536.1	NP_001230536.1 translin-associated protein X GN=TSNAX [Sus scrofa]	13	13	23029000000	63796000	62371000	5002600000	3146300000	2707000000	80782000	116130000	38313000	13614000	33203000	5993100	86114000	10855000	3016100000	4035800000	46135000	41512000	4218400000	39892000	30676000	86835000	39945000	31139000	23954000	24387000	27232000	949080000	975870000	1615700000	1223000000	1182100000	1086600000	1196600000	1051000000	524760000	951950000	940700000	1306400000	392530000	1230500000	1281000000	1145400000	936750000
TPM1	XP_005659582.1	XP_005659582.1	XP_005659582.1 tropomyosin alpha-1 chain isoform X13 GN=TPM1 [Sus scrofa]	0	7	22947000000	939210000	680550000	1062200000	1302900000	1603500000	1332200000	1211200000	1247700000	523660000	752130000	415160000	1017100000	170810000	490300000	1409300000	635720000	628690000	1148600000	763460000	188130000	1147400000	1444400000	903600000	724820000	744510000	460290000	540340000	433700000	608860000	682470000	1587800000	697050000	400470000	1412000000	1678400000	857990000	1100300000	801830000	234090000	357890000	743810000	578430000	462470000
COTL1	XP_003361781.2	XP_003361781.2	XP_003361781.2 coactosin-like protein GN=COTL1 [Sus scrofa]	11	11	22921000000	1415900000	1275200000	1292500000	737210000	1022600000	1387000000	1335200000	848520000	428290000	1009300000	363660000	928470000	333960000	561470000	831610000	703710000	800170000	892370000	1220000000	408400000	870870000	1002200000	706600000	796900000	957450000	791410000	1570800000	1617900000	1361300000	937260000	1126900000	1432100000	1553900000	1196100000	911420000	1648200000	943240000	1227000000	902070000	892630000	799310000	1027400000	1301200000
VPS35	XP_020949905.1	XP_020949905.1	XP_020949905.1 vacuolar protein sorting-associated protein 35 GN=VPS35 [Sus scrofa]	35	35	22839000000	1299700000	960620000	1074500000	929940000	907740000	1197700000	1189300000	1002600000	470810000	884800000	362290000	945220000	386440000	778280000	1169200000	657540000	788950000	999020000	1056900000	511980000	1061700000	977180000	844580000	835600000	679060000	867770000	1387900000	1234100000	1184100000	1121200000	1101800000	1196200000	1232200000	1270800000	1321000000	1248600000	1096500000	1156700000	1288600000	1028900000	1085700000	972870000	1176800000
ECHS1	NP_001177104.1	NP_001177104.1	NP_001177104.1 enoyl-CoA hydratase, mitochondrial GN=ECHS1 [Sus scrofa]	16	16	22764000000	673770000	687690000	1058500000	1054200000	1296700000	1138800000	1088600000	661420000	281220000	645050000	326080000	1070600000	351870000	981840000	1693100000	790470000	592450000	895010000	1049300000	661390000	1295200000	959270000	931560000	743720000	724400000	1112200000	881710000	886930000	1078800000	1283100000	1289600000	1214400000	1115600000	971690000	1152700000	1006600000	1211700000	1342800000	1209200000	1272400000	1281300000	1164100000	951660000
CDC42	XP_005656096.1;XP_005656097.1;NP_001072148.1	XP_005656096.1;XP_005656097.1;NP_001072148.1	XP_005656096.1 cell division control protein 42 homolog isoform X1 GN=CDC42 [Sus scrofa];XP_005656097.1 cell division control protein 42 homolog isoform X2 GN=CDC42 [Sus scrofa];NP_001072148.1 cell division control protein 42 homolog GN=CDC42 [Sus scrofa]	8	8	22597000000	910390000	1058100000	899340000	916550000	1055200000	1335800000	1401800000	663060000	295340000	758280000	311140000	1026600000	361890000	917240000	1164500000	610340000	894100000	971430000	1103700000	420920000	1221600000	1037400000	979910000	687330000	524790000	1070600000	885270000	1254200000	1001100000	917670000	1223900000	1203900000	1452400000	987240000	688170000	1123800000	911890000	1188000000	1015400000	1317400000	1003400000	865850000	1194000000
HK1	NP_001230113.1	NP_001230113.1	NP_001230113.1 hexokinase-1 GN=HK1 [Sus scrofa]	37	44	22566000000	931170000	1002100000	1197900000	943360000	1013400000	1337600000	1153500000	663670000	363010000	648850000	417560000	916320000	293760000	662410000	1517700000	779990000	570340000	1127300000	1133500000	465940000	1060800000	908990000	1023400000	753480000	713750000	965830000	1017900000	1138200000	1214500000	1018100000	1092500000	1143000000	1159500000	943200000	1240400000	1178100000	1458500000	1184200000	1203200000	1015200000	1233700000	1191500000	905820000
SND1	XP_020934292.1	XP_020934292.1	XP_020934292.1 staphylococcal nuclease domain-containing protein 1 GN=SND1 [Sus scrofa]	45	45	22563000000	1179000000	992950000	1277000000	955400000	784280000	1194000000	1006400000	879300000	368900000	797800000	245820000	848490000	307800000	793920000	1468700000	868250000	609980000	969230000	1029800000	563290000	1199200000	1012000000	848050000	593710000	681920000	1087800000	1345700000	1221000000	1254800000	1107400000	942890000	1099800000	1022700000	1128900000	1238300000	1121600000	1089600000	1017300000	1062200000	1088600000	1220800000	1338900000	1035200000
CCT7	NP_001163993.1	NP_001163993.1	NP_001163993.1 T-complex protein 1 subunit eta GN=CCT7 [Sus scrofa]	28	28	22547000000	1149500000	960180000	1071800000	918870000	770660000	1229300000	1073300000	975420000	372190000	790320000	294130000	912920000	325630000	676120000	1306800000	852600000	779420000	1030300000	1122800000	608180000	1012200000	1136100000	886410000	799550000	668540000	823940000	1278400000	1158900000	1028700000	1154800000	998770000	1112000000	1167300000	1257900000	1146600000	1160600000	1130500000	1166100000	1090000000	1212400000	1244100000	1259600000	1207100000
MVP	XP_020942084.1;XP_020942083.1	XP_020942084.1;XP_020942083.1	XP_020942084.1 major vault protein GN=MVP [Sus scrofa];XP_020942083.1 major vault protein GN=MVP [Sus scrofa]	46	46	22511000000	725210000	592900000	1594300000	421040000	833740000	1621000000	562080000	455540000	240740000	973370000	152420000	996200000	440660000	339980000	1494500000	648180000	783880000	1488500000	1370200000	621530000	1099400000	879160000	1192000000	999560000	851070000	1134100000	836510000	815660000	1559700000	629390000	946540000	1433500000	611300000	716680000	945150000	1349000000	787510000	1089900000	1578300000	632380000	1189000000	961090000	1157000000
THY1	XP_013834901.1;XP_005667453.1;NP_001139601.1	XP_013834901.1;XP_005667453.1;NP_001139601.1	XP_013834901.1 thy-1 membrane glycoprotein isoform X1 GN=THY1 [Sus scrofa];XP_005667453.1 thy-1 membrane glycoprotein isoform X1 GN=THY1 [Sus scrofa];NP_001139601.1 thy-1 membrane glycoprotein precursor GN=THY1 [Sus scrofa]	5	5	22342000000	684000000	881220000	786170000	1037100000	1105600000	1092600000	1187600000	709220000	337950000	616020000	444700000	1141400000	559600000	854850000	1539100000	876940000	689370000	1408900000	1124000000	415380000	1241700000	931560000	954120000	360120000	410110000	952480000	871520000	1088700000	732770000	1328100000	1371900000	1100200000	1207600000	960160000	1055800000	1040900000	1456400000	1401400000	1776200000	1201300000	1312900000	1231500000	1124600000
RAB1B	NP_001116645.1;XP_020955042.1	NP_001116645.1	NP_001116645.1 ras-related protein Rab-1B GN=RAB1B [Sus scrofa]	6	12	22177000000	772090000	963510000	1039400000	779850000	863640000	1057500000	1099500000	790120000	494670000	898090000	458140000	999550000	391450000	761660000	1158500000	677190000	726570000	849930000	809270000	485430000	1278300000	1148800000	1026700000	630220000	818950000	1197600000	837890000	1217900000	1039000000	946930000	1014500000	979650000	1049100000	1053300000	1279900000	1164400000	1356100000	1187200000	1077000000	990670000	1003500000	1128800000	1092100000
LRP1	XP_020947485.1;XP_020931944.1;XP_020938382.1;XP_020938379.1	XP_020947485.1	XP_020947485.1 LOW QUALITY PROTEIN: prolow-density lipoprotein receptor-related protein 1 GN=LRP1 [Sus scrofa]	95	96	22163000000	1039000000	808620000	808810000	991050000	756700000	1145500000	1230900000	829970000	429000000	870920000	349010000	750430000	344410000	841420000	1613800000	864020000	736360000	1305600000	1027800000	429280000	1037400000	903430000	925220000	865130000	479940000	778840000	1124800000	1061200000	1051200000	1144500000	981200000	1090600000	1121600000	1089700000	1269200000	1122000000	1370000000	959610000	1215400000	1181500000	1225700000	1217700000	1051900000
RAB11B	NP_001231804.1	NP_001231804.1	NP_001231804.1 ras-related protein Rab-11B GN=RAB11B [Sus scrofa]	2	13	22101000000	758460000	877860000	971030000	654690000	929770000	1135400000	1032700000	969490000	540910000	733230000	528880000	1055600000	400830000	884820000	1276700000	582570000	719160000	904210000	819050000	530000000	1221200000	1034100000	994050000	687940000	820600000	1037900000	919640000	1092500000	1016500000	893870000	1007500000	1112000000	1099800000	1231400000	1468500000	1210300000	1466200000	1238600000	1277200000	1005300000	1068400000	1125000000	1067400000
GBP1	XP_020944162.1;XP_020944163.1;NP_001121945.1	XP_020944162.1;XP_020944163.1;NP_001121945.1	XP_020944162.1 interferon-induced guanylate-binding protein 1 isoform X1 GN=GBP1 [Sus scrofa];XP_020944163.1 interferon-induced guanylate-binding protein 1 isoform X1 GN=GBP1 [Sus scrofa];NP_001121945.1 interferon-induced guanylate-binding protein 1 GN=GBP	20	24	21784000000	1341400000	839940000	1108500000	735030000	812380000	1155900000	2290100000	909440000	317540000	1150400000	279890000	1145700000	315520000	1604600000	716370000	588000000	437200000	476670000	1194600000	256080000	669780000	847750000	429550000	371280000	1061900000	728750000	1384700000	1008700000	1098000000	926120000	1019000000	970500000	2061200000	967770000	850990000	1430900000	947060000	1220700000	961590000	1745000000	657130000	807700000	643960000
HSPE1	NP_999472.1	NP_999472.1	NP_999472.1 10 kDa heat shock protein, mitochondrial GN=HSPE1 [Sus scrofa]	6	6	21676000000	786470000	1226700000	1644100000	820210000	1116800000	831530000	728740000	600650000	454260000	817150000	396240000	819440000	265600000	442160000	1333200000	603060000	945480000	1413700000	942040000	256830000	729350000	721750000	1195400000	1238400000	751630000	595380000	1032600000	1321500000	1663000000	884960000	1154100000	1013600000	785350000	955660000	1208100000	1183200000	1171800000	1077800000	819820000	830020000	1148600000	957350000	1255900000
CA2	XP_001927840.1	XP_001927840.1	XP_001927840.1 carbonic anhydrase 2 GN=CA2 [Sus scrofa]	15	15	21656000000	1278500000	661150000	808220000	911650000	1172600000	800080000	1294900000	824500000	423900000	615150000	283340000	1154000000	709410000	1885300000	380280000	518890000	1455900000	346930000	796270000	1551900000	583390000	600280000	181270000	307920000	1487700000	622910000	1362800000	900290000	847810000	1068700000	1356300000	863550000	1216100000	1291200000	1208900000	1099300000	1229500000	1571300000	2258900000	2123600000	486600000	852690000	1894100000
ANXA11	XP_005671204.1;XP_020929657.1;XP_013838831.1;XP_001924213.1	XP_005671204.1;XP_020929657.1;XP_013838831.1;XP_001924213.1	XP_005671204.1 annexin A11 isoform X2 GN=ANXA11 [Sus scrofa];XP_020929657.1 annexin A11 isoform X1 GN=ANXA11 [Sus scrofa];XP_013838831.1 annexin A11 isoform X1 GN=ANXA11 [Sus scrofa];XP_001924213.1 annexin A11 isoform X1 GN=ANXA11 [Sus scrofa]	21	22	21597000000	754070000	1057400000	1130200000	658630000	1022300000	1114100000	965310000	707630000	427940000	616290000	413160000	938750000	302660000	864700000	1469000000	603760000	802930000	1117900000	922180000	328880000	1188100000	866710000	1019400000	537700000	642700000	1124700000	945350000	1244600000	1056700000	840540000	1148800000	1003100000	1078500000	973860000	1344600000	1146600000	1552000000	1307400000	1171200000	990840000	1107600000	906660000	1317900000
GDI1	XP_020936412.1;XP_003360570.1	XP_020936412.1;XP_003360570.1	XP_020936412.1 rab GDP dissociation inhibitor alpha isoform X2 GN=GDI1 [Sus scrofa];XP_003360570.1 rab GDP dissociation inhibitor alpha isoform X1 GN=GDI1 [Sus scrofa]	24	24	21324000000	920020000	814480000	1030500000	1014300000	1012500000	1317700000	1109800000	820460000	381060000	801210000	290000000	850440000	385580000	711730000	1284400000	667490000	654050000	1047000000	1036600000	368920000	945820000	873880000	826090000	826490000	537480000	796320000	1166600000	1047700000	1063900000	1236200000	1222500000	1194500000	1126600000	1136000000	1177300000	1096200000	932120000	1098900000	1108000000	1167900000	1093800000	981460000	1049400000
COPA	XP_001928742.1;XP_001928732.1	XP_001928742.1;XP_001928732.1	XP_001928742.1 coatomer subunit alpha isoform X2 GN=COPA [Sus scrofa];XP_001928732.1 coatomer subunit alpha isoform X1 GN=COPA [Sus scrofa]	58	58	21308000000	1072400000	960390000	1036300000	922470000	655280000	1243100000	1132900000	824770000	387900000	691490000	352860000	738240000	293150000	763900000	1498500000	825900000	591160000	1023900000	881820000	496950000	1040800000	1035700000	852850000	559890000	607220000	818250000	1068300000	1143700000	1183500000	1114800000	861340000	1104000000	1136500000	1106300000	1172500000	1090600000	1145400000	922400000	1041200000	1106400000	1218100000	1170200000	933650000
SET	XP_020927695.1;XP_020927656.1;XP_020927726.1;NP_001231019.1	XP_020927695.1;XP_020927656.1;XP_020927726.1;NP_001231019.1	XP_020927695.1 protein SET isoform X2 GN=SET [Sus scrofa];XP_020927656.1 protein SET isoform X1 GN=SET [Sus scrofa];XP_020927726.1 protein SET isoform X3 GN=SET [Sus scrofa];NP_001231019.1 protein SET GN=SET [Sus scrofa]	11	13	21308000000	1020600000	923200000	1349700000	787530000	748810000	1297000000	1293100000	529570000	386160000	708150000	274980000	950200000	303150000	805730000	1320300000	722700000	824350000	858160000	954360000	502850000	1053000000	875960000	767160000	562360000	595460000	893880000	1194300000	1127100000	1370200000	1043500000	963030000	1223800000	1366300000	1151200000	1016500000	1168800000	908030000	1103100000	868950000	1193500000	1212400000	996950000	1173800000
SDHA	XP_020932590.1;XP_020932589.1	XP_020932590.1;XP_020932589.1	XP_020932590.1 succinate dehydrogenase flavoprotein subunit, mitochondrial isoform X2 GN=SDHA [Sus scrofa];XP_020932589.1 succinate dehydrogenase flavoprotein subunit, mitochondrial isoform X1 GN=SDHA [Sus scrofa]	26	26	21283000000	920230000	812510000	1024800000	804040000	1008300000	1229200000	1076500000	788140000	404290000	846470000	350870000	876650000	235870000	707900000	1339500000	656890000	723990000	1058500000	1050200000	220960000	1147000000	844300000	875330000	819660000	551250000	909770000	999390000	1000700000	1067500000	939300000	1109100000	1026600000	960900000	947490000	975270000	1051700000	1039100000	1027100000	848400000	1035900000	1189500000	1015100000	1058700000
RPLP1	XP_020956355.1	XP_020956355.1	XP_020956355.1 60S acidic ribosomal protein P1 GN=RPLP1 [Sus scrofa]	3	3	21244000000	1228900000	555840000	935210000	868500000	838850000	1166600000	1090400000	934080000	335900000	811490000	215460000	976940000	311220000	938840000	915250000	947400000	813730000	1051500000	709480000	634420000	1407600000	865350000	589220000	572360000	796670000	733230000	1307300000	1089600000	830500000	1043600000	972620000	1116200000	1155900000	1206600000	1170500000	1234000000	882480000	1076400000	977050000	1129500000	1219600000	1335400000	1139100000
PPP1CA	NP_001038024.1	NP_001038024.1	NP_001038024.1 serine/threonine-protein phosphatase PP1-alpha catalytic subunit GN=PPP1CA [Sus scrofa]	5	20	21210000000	1034700000	870050000	965070000	797470000	913090000	1299400000	1222000000	865360000	408240000	825040000	297830000	824120000	291900000	760510000	1376100000	607810000	644520000	1003800000	1071800000	389970000	1036700000	990580000	789850000	659470000	532440000	732100000	1086100000	1046000000	1017100000	985480000	1057400000	1176100000	1209700000	1152100000	1119500000	1289100000	951980000	1019500000	935830000	1010600000	1157800000	892260000	956370000
HSPA4	XP_005661711.1	XP_005661711.1	XP_005661711.1 heat shock 70 kDa protein 4 GN=HSPA4 [Sus scrofa]	40	43	21203000000	1089600000	969620000	1134800000	766790000	742530000	1211000000	1062000000	1017900000	417550000	876580000	284560000	888040000	269870000	712210000	1316500000	685820000	726570000	892000000	924900000	451550000	878680000	964400000	777470000	678790000	620580000	842190000	1202600000	1216600000	1220500000	1045700000	1012500000	1066200000	1088100000	1256100000	1265600000	1160300000	1019500000	1034100000	1035900000	1099700000	1116000000	1042500000	1145000000
NPC2	NP_999371.1	NP_999371.1	NP_999371.1 NPC intracellular cholesterol transporter 2 precursor GN=NPC2 [Sus scrofa]	8	8	21144000000	1364400000	1258000000	860390000	664440000	657850000	914280000	830690000	735370000	364750000	727450000	235390000	515270000	253450000	418030000	1066100000	656160000	912890000	993850000	1305300000	654800000	1020200000	1017900000	827240000	1120300000	488440000	1281100000	1719400000	1737000000	809290000	865570000	805930000	989890000	997120000	985430000	930110000	1125000000	750110000	654270000	729490000	578760000	1045700000	924760000	1379400000
OLA1	XP_020931811.1	XP_020931811.1	XP_020931811.1 LOW QUALITY PROTEIN: obg-like ATPase 1 GN=OLA1 [Sus scrofa]	19	19	21093000000	4654800000	242150000	3401500000	156880000	4065600000	269270000	221240000	165460000	55298000	135160000	42484000	181390000	48820000	187430000	249380000	168870000	116880000	2227600000	3486000000	103250000	200180000	124950000	173310000	131770000	149160000	134510000	1062000000	1100200000	1141400000	864050000	1022100000	1060500000	941090000	1113800000	761560000	936290000	716840000	1013300000	751420000	1302900000	898710000	1023200000	871020000
COMT	XP_005670994.1;XP_005670993.1;NP_001182259.1	XP_005670994.1;XP_005670993.1;NP_001182259.1	XP_005670994.1 catechol O-methyltransferase isoform X1 GN=COMT [Sus scrofa];XP_005670993.1 catechol O-methyltransferase isoform X1 GN=COMT [Sus scrofa];NP_001182259.1 catechol O-methyltransferase GN=COMT [Sus scrofa]	17	17	21086000000	930420000	1019800000	982810000	826290000	855690000	1189000000	954230000	834050000	312800000	801570000	236030000	923490000	315320000	726970000	1432400000	629030000	659860000	980230000	1135900000	439530000	1257800000	845200000	837580000	693030000	653870000	612990000	1095400000	1266900000	1010200000	1045100000	977890000	1143400000	986920000	1132400000	990890000	1199100000	996780000	1117900000	960230000	995470000	1215000000	1050500000	986240000
PGM1	XP_020949232.1;XP_020949230.1	XP_020949232.1;XP_020949230.1	XP_020949232.1 phosphoglucomutase-1 isoform X2 GN=PGM1 [Sus scrofa];XP_020949230.1 phosphoglucomutase-1 isoform X1 GN=PGM1 [Sus scrofa]	5	32	21044000000	1134300000	1006100000	1252900000	1059200000	995060000	1350200000	1233900000	724300000	301630000	698240000	314520000	818980000	309270000	996770000	1090600000	539120000	790790000	1041500000	956190000	345710000	865490000	716420000	758320000	713870000	527950000	502510000	1175400000	1103500000	1256500000	1201300000	1101700000	1138900000	1096600000	1014600000	1096700000	1109600000	1225700000	1014000000	1089900000	1239100000	857900000	871090000	1176500000
NIT2	NP_001231271.1;XP_020924132.1;XP_020924134.1;XP_020924133.1	NP_001231271.1;XP_020924132.1;XP_020924134.1;XP_020924133.1	NP_001231271.1 omega-amidase NIT2 GN=NIT2 [Sus scrofa];XP_020924132.1 omega-amidase NIT2 isoform X1 GN=NIT2 [Sus scrofa];XP_020924134.1 omega-amidase NIT2 isoform X3 GN=NIT2 [Sus scrofa];XP_020924133.1 omega-amidase NIT2 isoform X2 GN=NIT2 [Sus scrofa]	16	16	20951000000	935180000	621720000	1089600000	1894500000	1303400000	1024800000	1270000000	376030000	185900000	320010000	179760000	419940000	485950000	344580000	1096200000	1768800000	505140000	3225800000	1252900000	422360000	359960000	355620000	421610000	450850000	304220000	335780000	1129700000	949280000	949280000	1126700000	1221000000	1194900000	1091200000	998240000	1155500000	1095800000	1216300000	1136300000	1019700000	1128800000	957580000	935470000	962490000
IDH1	XP_013839887.1;XP_013839886.1;XP_005672194.1;XP_005672193.1;XP_020930567.1	XP_013839887.1;XP_013839886.1;XP_005672194.1;XP_005672193.1;XP_020930567.1	XP_013839887.1 isocitrate dehydrogenase cytoplasmic isoform X2 GN=IDH1 [Sus scrofa];XP_013839886.1 isocitrate dehydrogenase cytoplasmic isoform X2 GN=IDH1 [Sus scrofa];XP_005672194.1 isocitrate dehydrogenase cytoplasmic isoform X2 GN=IDH1 [Sus scrofa];X	19	19	20688000000	793890000	935090000	994430000	752080000	1251000000	1141100000	1001000000	709750000	383990000	657780000	353510000	767300000	399090000	743480000	1168000000	693570000	600770000	1043200000	1044100000	383370000	906220000	772640000	911740000	855020000	588460000	837200000	982290000	1143400000	1081300000	972990000	1025200000	1120900000	1041700000	1046300000	1263600000	952760000	1137900000	992430000	1158800000	1044500000	1083500000	1151600000	938480000
LOC100520329	XP_020922632.1	XP_020922632.1	XP_020922632.1 LOW QUALITY PROTEIN: membrane primary amine oxidase GN=LOC100520329 [Sus scrofa]	10	22	20535000000	915240000	771780000	658020000	1022700000	1075500000	885620000	918810000	904100000	478690000	557130000	413160000	937070000	379170000	609200000	1132500000	772620000	702030000	921210000	935000000	397810000	1221300000	888550000	993210000	403810000	743240000	897060000	960780000	909300000	699980000	1170600000	1210300000	779720000	940400000	1164600000	1302900000	883620000	1234500000	1181100000	1118300000	1018900000	927470000	1267100000	941720000
ARPC4	XP_020923906.1;NP_001193464.1;XP_020923905.1;XP_020923907.1	XP_020923906.1;NP_001193464.1;XP_020923905.1;XP_020923907.1	XP_020923906.1 actin-related protein 2/3 complex subunit 4 isoform X2 GN=ARPC4 [Sus scrofa];NP_001193464.1 actin-related protein 2/3 complex subunit 4 GN=ARPC4 [Sus scrofa];XP_020923905.1 actin-related protein 2/3 complex subunit 4 isoform X1 GN=ARPC4 [Sus	10	10	20521000000	1018900000	1017900000	828410000	714530000	878040000	1196200000	1094500000	680910000	415900000	907240000	447320000	877650000	425040000	679010000	990370000	631540000	711180000	832840000	863050000	308830000	990530000	910900000	847710000	752960000	771760000	728170000	1132800000	1103500000	1074400000	917060000	1035100000	1191700000	1289300000	1032300000	1517300000	1505800000	1372500000	1082700000	1267100000	923830000	853650000	838170000	1122100000
PDLIM7	XP_020940039.1;XP_020940038.1;XP_020940036.1;XP_020940035.1;XP_020940044.1;XP_020940043.1;XP_020940042.1;XP_020940049.1;XP_020940048.1;XP_020940050.1;XP_020940041.1	XP_020940039.1;XP_020940038.1;XP_020940036.1;XP_020940035.1;XP_020940044.1;XP_020940043.1;XP_020940042.1;XP_020940049.1;XP_020940048.1	XP_020940039.1 PDZ and LIM domain protein 7 isoform X5 GN=PDLIM7 [Sus scrofa];XP_020940038.1 PDZ and LIM domain protein 7 isoform X4 GN=PDLIM7 [Sus scrofa];XP_020940036.1 PDZ and LIM domain protein 7 isoform X2 GN=PDLIM7 [Sus scrofa];XP_020940035.1 PDZ and	2	20	20484000000	778020000	778200000	817550000	1276300000	1014400000	1079700000	678150000	876220000	470330000	643260000	377310000	573600000	351480000	576460000	1482900000	840800000	715450000	873090000	1114500000	265240000	1050800000	901050000	1118300000	705280000	615020000	510930000	1062200000	1026200000	1065600000	1185600000	1367200000	1198300000	900270000	1213400000	1260400000	874020000	979510000	829000000	922660000	877360000	1475800000	1123200000	837670000
GNB1	XP_020953154.1;XP_020953153.1;XP_020953152.1;XP_020953151.1;XP_020953150.1;XP_020953149.1	XP_020953154.1;XP_020953153.1;XP_020953152.1;XP_020953151.1;XP_020953150.1;XP_020953149.1	XP_020953154.1 guanine nucleotide-binding protein G(I)/G(S)/G(T) subunit beta-1 GN=GNB1 [Sus scrofa];XP_020953153.1 guanine nucleotide-binding protein G(I)/G(S)/G(T) subunit beta-1 GN=GNB1 [Sus scrofa];XP_020953152.1 guanine nucleotide-binding protein G(I)	8	8	20463000000	941570000	838440000	612230000	877150000	918040000	1283600000	1305500000	822030000	402700000	758460000	322660000	763850000	307170000	761020000	1086400000	572250000	673850000	986130000	992110000	339170000	1172400000	876450000	841170000	733840000	467810000	807310000	1021300000	990720000	625310000	1075400000	1110100000	1200500000	1350200000	1105800000	1220200000	1150100000	1066600000	960810000	1017400000	994620000	966770000	825960000	1040100000
APOB	XP_020941351.1;NP_001302613.1	XP_020941351.1;NP_001302613.1	XP_020941351.1 apolipoprotein B-100 isoform X1 GN=APOB [Sus scrofa];NP_001302613.1 apolipoprotein B-100 GN=APOB [Sus scrofa]	148	153	20462000000	323130000	528440000	443060000	1720000000	1297900000	229750000	356220000	929230000	332180000	1022900000	259440000	1317400000	1299000000	4236300000	119600000	401920000	864120000	522990000	979700000	513480000	361370000	268880000	709770000	213130000	784950000	427350000	646430000	780570000	610650000	1784400000	1319100000	371580000	537830000	1192500000	1030500000	1515400000	1080700000	1284700000	3547100000	4547300000	70123000	967130000	1333800000
C4BPA	XP_020918981.1;XP_013835101.2;XP_005667608.2;XP_005667607.2;XP_020918984.1;XP_020918983.1	XP_020918981.1;XP_013835101.2;XP_005667608.2;XP_005667607.2;XP_020918984.1;XP_020918983.1	XP_020918981.1 C4b-binding protein alpha chain isoform X2 GN=C4BPA [Sus scrofa];XP_013835101.2 C4b-binding protein alpha chain isoform X2 GN=C4BPA [Sus scrofa];XP_005667608.2 C4b-binding protein alpha chain isoform X2 GN=C4BPA [Sus scrofa];XP_005667607.2 C	19	23	20424000000	1035400000	577700000	385560000	1160100000	1060500000	608600000	613880000	1165800000	431960000	765260000	215950000	1142500000	789580000	2234300000	493370000	885060000	1336000000	510340000	701800000	410350000	649240000	966540000	582650000	454850000	485340000	761330000	1163300000	799550000	424650000	1402700000	1233800000	728440000	758210000	1470000000	1256500000	1162400000	731550000	1364600000	2065100000	2532900000	468270000	1179400000	1745900000
ARPC3	NP_001172064.1	NP_001172064.1	NP_001172064.1 actin-related protein 2/3 complex subunit 3 GN=ARPC3 [Sus scrofa]	9	9	20361000000	966220000	1197400000	1229200000	795730000	866550000	1371400000	895880000	688650000	396610000	788060000	281000000	728030000	413150000	537150000	744220000	894610000	741870000	1043800000	1085100000	403990000	782680000	802420000	774050000	567730000	610320000	755150000	996500000	1193000000	1141300000	1120400000	1023200000	998110000	935830000	998980000	866690000	1217100000	976840000	1162400000	858670000	1015000000	804360000	999940000	1024900000
PA2G4	XP_013843758.1;XP_020947459.1	XP_013843758.1;XP_020947459.1	XP_013843758.1 proliferation-associated protein 2G4 isoform X1 GN=PA2G4 [Sus scrofa];XP_020947459.1 proliferation-associated protein 2G4 isoform X2 GN=PA2G4 [Sus scrofa]	22	22	20342000000	1125900000	836510000	1028700000	828770000	817950000	1222600000	877740000	819840000	355450000	630980000	255140000	751830000	323930000	725570000	1344500000	660160000	736260000	920740000	966550000	464130000	852150000	896550000	677760000	683400000	561390000	977270000	1168000000	997260000	1131300000	965960000	970010000	1026100000	888950000	1021700000	1080700000	893420000	943850000	957740000	1076700000	991290000	1164500000	999770000	1068200000
DDAH2	XP_020954119.1;XP_020954118.1;XP_020954117.1	XP_020954119.1;XP_020954118.1;XP_020954117.1	XP_020954119.1 N(G),N(G)-dimethylarginine dimethylaminohydrolase 2 GN=DDAH2 [Sus scrofa];XP_020954118.1 N(G),N(G)-dimethylarginine dimethylaminohydrolase 2 GN=DDAH2 [Sus scrofa];XP_020954117.1 N(G),N(G)-dimethylarginine dimethylaminohydrolase 2 GN=DDAH2 [S	12	13	20336000000	763100000	802940000	974340000	963300000	1060900000	1208700000	1107500000	741740000	356080000	616410000	311510000	872920000	328800000	709710000	1246200000	657620000	594450000	1169200000	879930000	314540000	1045900000	648660000	1084000000	787870000	401760000	687420000	892450000	929960000	1057600000	1187300000	1181300000	1137600000	1090300000	1012400000	1213700000	935880000	1154200000	994650000	1157500000	1008600000	1033100000	1001700000	971380000
LYN	XP_020945022.1;XP_020945021.1;XP_020945020.1;XP_020945019.1;XP_020945018.1;XP_020945017.1;XP_020945015.1;XP_020945016.1	XP_020945022.1;XP_020945021.1;XP_020945020.1;XP_020945019.1;XP_020945018.1;XP_020945017.1;XP_020945015.1;XP_020945016.1	XP_020945022.1 tyrosine-protein kinase Lyn isoform X3 GN=LYN [Sus scrofa];XP_020945021.1 tyrosine-protein kinase Lyn isoform X1 GN=LYN [Sus scrofa];XP_020945020.1 tyrosine-protein kinase Lyn isoform X1 GN=LYN [Sus scrofa];XP_020945019.1 tyrosine-protein ki	16	17	20286000000	811520000	563270000	984660000	2119400000	1318900000	988230000	1084500000	780410000	260120000	353540000	123760000	166110000	1062800000	4209500000	716120000	738000000	625070000	509300000	560650000	28149000	721120000	591540000	301780000	165620000	353690000	148210000	1033600000	1358300000	808740000	829810000	1070100000	964710000	1218200000	897360000	1260900000	1127000000	1193700000	1197100000	1355300000	1243500000	829580000	860360000	1158200000
HYOU1	XP_020918614.1;XP_020918613.1;XP_005667477.2;XP_020918612.1;XP_020918611.1;XP_005667476.2;XP_020918610.1;XP_020918609.1;XP_013834917.2;XP_003129970.2;XP_005667473.2;XP_020918615.1	XP_020918614.1;XP_020918613.1;XP_005667477.2;XP_020918612.1;XP_020918611.1;XP_005667476.2;XP_020918610.1;XP_020918609.1;XP_013834917.2;XP_003129970.2;XP_005667473.2;XP_020918615.1	XP_020918614.1 hypoxia up-regulated protein 1 isoform X7 GN=HYOU1 [Sus scrofa];XP_020918613.1 hypoxia up-regulated protein 1 isoform X6 GN=HYOU1 [Sus scrofa];XP_005667477.2 hypoxia up-regulated protein 1 isoform X6 GN=HYOU1 [Sus scrofa];XP_020918612.1 hypo	39	39	20279000000	931800000	1155100000	1019800000	742280000	694350000	995880000	1067300000	734030000	331260000	677940000	221190000	768170000	266300000	660040000	1338000000	968370000	726060000	748600000	908940000	640410000	786430000	924140000	896220000	614960000	703680000	758240000	1037600000	1171800000	1101500000	857370000	848410000	882690000	927170000	1077500000	1092600000	1048400000	922780000	880550000	991760000	886160000	1064700000	1202100000	999780000
SLA-DRB1	NP_001107167.1;XP_020954162.1;XP_020954161.1	NP_001107167.1	NP_001107167.1 MHC class II histocompatibility antigen SLA-DRB1 precursor GN=SLA-DRB1 [Sus scrofa]	5	9	20216000000	411220000	872630000	1081000000	650920000	719390000	1206900000	1103100000	409520000	229120000	787900000	543880000	731650000	468520000	695520000	790940000	568420000	619470000	772390000	1408600000	611690000	744120000	937990000	653370000	417100000	1303300000	1477100000	1029700000	1326300000	994880000	970020000	982210000	1260600000	1270700000	985480000	508440000	1236900000	778710000	1092200000	1059000000	1011800000	1028900000	751880000	1207700000
NIBAN2	XP_020924904.1;XP_020924913.1	XP_020924904.1;XP_020924913.1	XP_020924904.1 niban-like protein 1 isoform X1 GN=NIBAN2 [Sus scrofa];XP_020924913.1 niban-like protein 1 isoform X2 GN=NIBAN2 [Sus scrofa]	32	32	20198000000	995700000	1068300000	1211800000	944260000	865040000	1275400000	1190700000	723870000	405190000	561020000	421060000	716000000	277570000	519670000	1119200000	692070000	677630000	815410000	875600000	566450000	917230000	797230000	711670000	692890000	425040000	731660000	963740000	1216300000	1164900000	1004100000	993890000	1119800000	1124900000	1083900000	1191400000	1031100000	1216500000	1010300000	961900000	922580000	990700000	904640000	800090000
HSPA9	XP_005661752.1	XP_005661752.1	XP_005661752.1 stress-70 protein, mitochondrial GN=HSPA9 [Sus scrofa]	30	30	20076000000	856080000	823860000	1002900000	594370000	779900000	979360000	815440000	820780000	447040000	618610000	349760000	767290000	330890000	687280000	1285600000	548550000	744580000	929740000	914020000	438810000	853450000	927770000	950470000	758480000	721030000	1129700000	970280000	1088500000	1037900000	893400000	887130000	989720000	899330000	974470000	1259300000	974310000	1069500000	959580000	942690000	922230000	1038000000	927620000	1049200000
GLO1	XP_001927992.1	XP_001927992.1	XP_001927992.1 lactoylglutathione lyase GN=GLO1 [Sus scrofa]	12	12	19991000000	899070000	842620000	1094700000	961440000	867680000	1281500000	918690000	663190000	350170000	647560000	384460000	808900000	336820000	641140000	1004600000	630150000	680610000	1042600000	863410000	398890000	750050000	880310000	800620000	917560000	597040000	726880000	956360000	1012400000	1156900000	1190400000	1047600000	1248600000	912430000	840420000	1009900000	1056400000	1403800000	951650000	1232800000	852910000	866860000	1013200000	1132700000
H2AZ2	XP_020934317.1;NP_001116594.1	XP_020934317.1;NP_001116594.1	XP_020934317.1 histone H2A.V GN=LOC100512448 [Sus scrofa];NP_001116594.1 histone H2A.Z GN=H2AFZ [Sus scrofa]	4	4	19869000000	1046500000	939320000	640210000	836530000	780130000	1169800000	1041100000	721460000	318170000	490970000	318620000	769210000	333860000	719200000	1065000000	685630000	921140000	911720000	922810000	434790000	957640000	816050000	707370000	656580000	658530000	1006800000	1145200000	1024700000	1258900000	1009900000	914100000	1132500000	1071400000	1036100000	951030000	825430000	1071200000	985230000	1007800000	1009400000	750760000	929640000	1327400000
-	CON__P04264	CON__P04264		25	37	19757000000	790180000	90868000	84656000	10190000000	117190000	89274000	41694000	1011500000	783470000	208570000	22776000	278400000	57073000	65961000	1715800000	295090000	242160000	74775000	425460000	53177000	191880000	65598000	461940000	177680000	161720000	2061000000	943050000	104180000	99337000	12560000000	120750000	98419000	59543000	1198200000	2154500000	331310000	42262000	286890000	157290000	70597000	1356000000	440490000	323090000
FLII	XP_020923641.1;XP_020923642.1	XP_020923641.1;XP_020923642.1	XP_020923641.1 protein flightless-1 homolog isoform X1 GN=FLII [Sus scrofa];XP_020923642.1 protein flightless-1 homolog isoform X2 GN=FLII [Sus scrofa]	38	38	19747000000	1017300000	906130000	938740000	998040000	531300000	760570000	694590000	851380000	457710000	844250000	260900000	537470000	303290000	959900000	710950000	830350000	635660000	1365200000	639770000	237860000	1027800000	1033700000	1048600000	790850000	529560000	834820000	1027200000	1060400000	1024000000	934250000	809220000	927310000	959460000	1101600000	1314900000	1036900000	1235700000	1057400000	927890000	954530000	921570000	1168100000	972380000
PPL	XP_003124688.4;XP_013851124.1	XP_003124688.4;XP_013851124.1	XP_003124688.4 periplakin isoform X1 GN=PPL [Sus scrofa];XP_013851124.1 periplakin isoform X2 GN=PPL [Sus scrofa]	79	81	19702000000	695940000	788460000	1234800000	729170000	1004300000	1811700000	1233700000	531140000	232350000	581240000	408630000	968810000	332340000	634090000	1456800000	441270000	649510000	752930000	805670000	453670000	672750000	618940000	767210000	980620000	260550000	655670000	767570000	920300000	1125700000	947300000	1095100000	1352600000	1038400000	707010000	932130000	986880000	997280000	1141600000	1066300000	972440000	1164300000	645480000	979430000
KHSRP	XP_020939646.1;XP_020939644.1	XP_020939646.1;XP_020939644.1	XP_020939646.1 far upstream element-binding protein 2 isoform X2 GN=KHSRP [Sus scrofa];XP_020939644.1 far upstream element-binding protein 2 isoform X1 GN=KHSRP [Sus scrofa]	26	28	19700000000	921510000	868830000	1244100000	914410000	777570000	975250000	944320000	751100000	371810000	567310000	223220000	676630000	282900000	719070000	1444900000	666070000	655050000	944850000	984840000	376060000	772300000	828840000	736030000	609660000	583970000	859620000	1048500000	958740000	1187400000	1045100000	907610000	1016600000	947670000	975610000	1056800000	902140000	883050000	842980000	865780000	884210000	1092900000	981170000	997660000
RPN2	XP_020932879.1;XP_020932876.1;XP_020932878.1;XP_020932875.1	XP_020932879.1;XP_020932876.1;XP_020932878.1;XP_020932875.1	XP_020932879.1 dolichyl-diphosphooligosaccharide--protein glycosyltransferase subunit 2 isoform X4 GN=RPN2 [Sus scrofa];XP_020932876.1 dolichyl-diphosphooligosaccharide--protein glycosyltransferase subunit 2 isoform X2 GN=RPN2 [Sus scrofa];XP_020932878.1 d	4	26	19602000000	574540000	813560000	1090700000	694270000	828660000	978260000	961600000	706470000	211680000	526940000	249780000	1090500000	288020000	1160300000	1252100000	701490000	529830000	901190000	890340000	377680000	1194600000	736900000	933960000	353850000	722470000	832590000	730870000	1196300000	1077000000	809710000	998560000	981780000	1041800000	965430000	666530000	878880000	979400000	1145000000	965900000	1109200000	1176900000	1044100000	901300000
APOH	XP_003131314.1;CON__P17690	XP_003131314.1	XP_003131314.1 beta-2-glycoprotein 1 isoform X1 GN=APOH [Sus scrofa]	4	17	19577000000	542230000	620310000	472670000	1278700000	929420000	734210000	985540000	873910000	378290000	688900000	403180000	803460000	1029900000	2929000000	659510000	568450000	754140000	663990000	516750000	506930000	857500000	455360000	566090000	261130000	383300000	714490000	792970000	770980000	706030000	1631500000	1126200000	753640000	1034800000	1190800000	1066700000	1071300000	954030000	971610000	2710600000	3955200000	716600000	973630000	1147300000
PIGR	XP_020957875.1;NP_999324.1	XP_020957875.1;NP_999324.1	XP_020957875.1 polymeric immunoglobulin receptor isoform X1 GN=PIGR [Sus scrofa];NP_999324.1 polymeric immunoglobulin receptor precursor GN=PIGR [Sus scrofa]	27	27	19473000000	1615700000	1685700000	579310000	1016600000	841650000	1235000000	738210000	511140000	295970000	526420000	195250000	712420000	669660000	780700000	917430000	608900000	775000000	962650000	659000000	217010000	488390000	825550000	699950000	680410000	329300000	905700000	2184900000	2565900000	710620000	731290000	744530000	1121300000	478070000	975820000	1066300000	865940000	704400000	840390000	1042900000	470110000	749840000	860420000	1461700000
OGDH	XP_020934722.1;XP_020934720.1;XP_020934718.1;XP_020934717.1;XP_003134939.5;XP_020934725.1;XP_020934723.1;XP_020934721.1;XP_020934719.1;XP_020928655.1	XP_020934722.1;XP_020934720.1;XP_020934718.1;XP_020934717.1;XP_003134939.5;XP_020934725.1;XP_020934723.1;XP_020934721.1;XP_020934719.1	XP_020934722.1 2-oxoglutarate dehydrogenase, mitochondrial isoform X3 GN=OGDH [Sus scrofa];XP_020934720.1 2-oxoglutarate dehydrogenase, mitochondrial isoform X3 GN=OGDH [Sus scrofa];XP_020934718.1 2-oxoglutarate dehydrogenase, mitochondrial isoform X1 GN=O	49	49	19406000000	820860000	632700000	847620000	767990000	820070000	1195100000	1115100000	814020000	356170000	702420000	343390000	840740000	280510000	641810000	1339400000	535960000	565740000	772830000	736760000	460230000	1028500000	966400000	736660000	685230000	554260000	845790000	874360000	865970000	975470000	913060000	966580000	940590000	959150000	1039600000	1138200000	1052700000	1282900000	1052900000	1121000000	1029400000	1059300000	791900000	962370000
BCAP31	XP_005674061.1;XP_005674060.1;XP_003135528.2;XP_020935331.1	XP_005674061.1;XP_005674060.1;XP_003135528.2;XP_020935331.1	XP_005674061.1 B-cell receptor-associated protein 31 isoform X2 GN=BCAP31 [Sus scrofa];XP_005674060.1 B-cell receptor-associated protein 31 isoform X2 GN=BCAP31 [Sus scrofa];XP_003135528.2 B-cell receptor-associated protein 31 isoform X2 GN=BCAP31 [Sus scr	8	8	19299000000	678180000	1661500000	1572900000	1138800000	1085100000	1651200000	1214500000	224750000	99279000	200600000	172460000	403120000	94569000	284770000	1593100000	740700000	936070000	1154700000	1459900000	161310000	571940000	548950000	467720000	223110000	296400000	662930000	643240000	1245200000	1278100000	824940000	1114300000	1246100000	1115300000	410520000	518590000	656970000	742560000	697130000	541010000	645640000	1102100000	823320000	1053800000
HINT1	XP_005661680.1	XP_005661680.1	XP_005661680.1 histidine triad nucleotide-binding protein 1 GN=HINT1 [Sus scrofa]	9	9	19284000000	1179100000	707110000	682020000	732820000	535630000	1402200000	1360800000	838780000	342610000	711230000	240100000	729160000	216510000	737050000	1265900000	639950000	724160000	705990000	932280000	474210000	861210000	762060000	650430000	606500000	496760000	749460000	1351500000	948640000	797620000	930140000	808780000	1289400000	1232600000	1076800000	875460000	991510000	706610000	1022900000	715920000	1067100000	969700000	941250000	1064900000
TXNDC5	XP_020955819.1	XP_020955819.1	XP_020955819.1 thioredoxin domain-containing protein 5 GN=TXNDC5 [Sus scrofa]	16	16	19262000000	1030800000	933340000	859100000	751280000	476070000	1018500000	892650000	717980000	322560000	638040000	197130000	468580000	226260000	629510000	1540500000	1048200000	698510000	1076900000	1008200000	439040000	658280000	974900000	777420000	519350000	547100000	811830000	1012100000	848940000	863800000	784090000	575500000	781020000	739420000	881730000	838970000	867810000	699300000	565870000	682710000	795380000	1102900000	1392000000	866740000
SPR	XP_003125080.1	XP_003125080.1	XP_003125080.1 sepiapterin reductase GN=SPR [Sus scrofa]	15	15	19170000000	755960000	757350000	1107100000	796170000	1011700000	1281800000	969810000	596110000	200640000	565270000	254980000	990640000	262800000	863530000	1073600000	582180000	619690000	1115500000	926040000	417860000	874150000	512670000	811800000	770750000	448200000	603970000	853850000	911190000	1120600000	1059300000	1226200000	1175800000	1009800000	814730000	637340000	857720000	920330000	1095200000	859560000	1225900000	1004300000	887600000	1002900000
ESYT1	XP_003126310.2	XP_003126310.2	XP_003126310.2 LOW QUALITY PROTEIN: extended synaptotagmin-1 GN=ESYT1 [Sus scrofa]	47	47	19116000000	628170000	851590000	1013800000	602360000	983390000	944450000	1003000000	722320000	310550000	574880000	307350000	932830000	346890000	605430000	1396300000	710530000	548410000	931740000	846120000	441980000	943850000	742410000	967110000	309270000	643500000	807680000	823910000	997660000	1047500000	800540000	1038900000	922080000	982610000	954190000	889260000	942550000	1021000000	1104800000	1017800000	950780000	1192800000	1079500000	899220000
PDCD6IP	XP_020927281.1;XP_020927280.1	XP_020927281.1;XP_020927280.1	XP_020927281.1 programmed cell death 6-interacting protein isoform X2 GN=PDCD6IP [Sus scrofa];XP_020927280.1 programmed cell death 6-interacting protein isoform X1 GN=PDCD6IP [Sus scrofa]	45	45	19077000000	1049200000	887830000	1039600000	802080000	634460000	1247100000	1013700000	640950000	321070000	639320000	286050000	691330000	261940000	556490000	1121100000	695290000	779150000	899920000	861630000	426740000	728460000	793430000	708960000	698440000	577350000	715500000	1066900000	1002000000	1043400000	880150000	878190000	1099500000	1013800000	878700000	1043400000	909760000	1149500000	838740000	1076600000	907270000	887700000	1010600000	1022700000
ACE	NP_001077410.2;NP_001028187.3	NP_001077410.2	NP_001077410.2 angiotensin-converting enzyme isoform 2 precursor GN=ACE [Sus scrofa]	40	40	19038000000	842330000	959300000	1469500000	895650000	1021100000	1210300000	1374700000	669040000	301680000	824920000	275800000	1084500000	217450000	595870000	747520000	352600000	790810000	1028700000	669320000	214220000	698630000	621130000	992930000	493060000	302960000	383990000	880600000	1061100000	1256200000	982270000	1130900000	987720000	1199600000	873120000	913740000	1121100000	1025800000	1204100000	833920000	874690000	667170000	693830000	1115200000
BGN	XP_003135523.1;XP_013841982.2	XP_003135523.1;XP_013841982.2	XP_003135523.1 biglycan isoform X2 GN=BGN [Sus scrofa];XP_013841982.2 biglycan isoform X1 GN=BGN [Sus scrofa]	17	17	19022000000	804620000	854460000	1118000000	1031200000	1113600000	1154900000	975330000	591340000	321760000	344750000	315340000	591080000	295190000	378850000	1612300000	878660000	377660000	1423200000	1067400000	437020000	711310000	501560000	878150000	374910000	484340000	384950000	898630000	1022500000	1148000000	1150400000	1219500000	1092400000	985790000	842200000	906610000	563640000	1028800000	723610000	908380000	571070000	1397300000	1253900000	567700000
TGFB1I1	XP_020942048.1;XP_020942052.1;XP_020942051.1;XP_020942050.1;XP_020942049.1	XP_020942048.1;XP_020942052.1;XP_020942051.1;XP_020942050.1;XP_020942049.1	XP_020942048.1 transforming growth factor beta-1-induced transcript 1 protein isoform X1 GN=TGFB1I1 [Sus scrofa];XP_020942052.1 transforming growth factor beta-1-induced transcript 1 protein isoform X2 GN=TGFB1I1 [Sus scrofa];XP_020942051.1 transforming gr	23	23	18984000000	1019400000	802100000	572150000	992010000	1013000000	1038400000	910300000	654040000	221840000	437060000	191570000	633270000	174740000	517190000	1752600000	715180000	549670000	1040500000	1461500000	373140000	997870000	618160000	817440000	591440000	324730000	564420000	1078600000	953320000	753560000	1238800000	1113800000	1002800000	882830000	923940000	982910000	713960000	850470000	807180000	681540000	691250000	1240500000	907200000	900770000
LMCD1	NP_001008692.1;XP_020924276.1	NP_001008692.1;XP_020924276.1	NP_001008692.1 LIM and cysteine-rich domains protein 1 GN=LMCD1 [Sus scrofa];XP_020924276.1 LIM and cysteine-rich domains protein 1 isoform X1 GN=LMCD1 [Sus scrofa]	24	24	18981000000	1017100000	737670000	841790000	956590000	909490000	1152600000	962990000	818230000	373310000	550780000	304650000	551400000	248950000	499250000	1886400000	590160000	578990000	1061600000	953820000	313630000	856050000	520770000	804380000	406630000	372410000	711200000	1047500000	946090000	1113500000	1097000000	1065700000	1142900000	954300000	998830000	899460000	896830000	972450000	823700000	781970000	827570000	1449800000	788730000	791710000
CKB	XP_020937161.1;NP_001230504.1	XP_020937161.1;NP_001230504.1	XP_020937161.1 creatine kinase B-type isoform X1 GN=CKB [Sus scrofa];NP_001230504.1 creatine kinase B-type GN=CKB [Sus scrofa]	16	16	18887000000	767860000	727380000	871110000	738380000	1207600000	1385600000	1032600000	754940000	230890000	464520000	165170000	900370000	154890000	617710000	1436800000	719190000	467760000	917430000	621050000	463540000	1030200000	620380000	932500000	690140000	402350000	566640000	914450000	949700000	983690000	979740000	1309400000	1167600000	955780000	1069600000	643420000	718610000	738070000	1270500000	694630000	1003700000	1095300000	1037300000	777700000
HDGF	XP_001924678.3;XP_013852409.2;XP_020955446.1	XP_001924678.3;XP_013852409.2	XP_001924678.3 hepatoma-derived growth factor isoform X2 GN=HDGF [Sus scrofa];XP_013852409.2 hepatoma-derived growth factor isoform X1 GN=HDGF [Sus scrofa]	12	13	18852000000	761510000	648660000	1001700000	800670000	814430000	1113600000	909640000	645770000	340880000	588930000	302010000	771330000	289050000	811300000	1116900000	499600000	655030000	972210000	987890000	368890000	856350000	741230000	715540000	791570000	560460000	787040000	951310000	963240000	1019600000	1037100000	949330000	1120700000	969400000	926500000	1006200000	948830000	1016200000	955690000	957420000	1041400000	991530000	832370000	1104000000
LAMB1	XP_003130317.3	XP_003130317.3	XP_003130317.3 LOW QUALITY PROTEIN: laminin subunit beta-1 GN=LAMB1 [Sus scrofa]	57	57	18842000000	675790000	654900000	1300300000	896710000	900860000	1025300000	1092300000	640550000	317580000	531320000	224650000	701650000	188220000	713980000	1394200000	762210000	579960000	1178900000	1189600000	332140000	552020000	569100000	1028500000	585270000	393960000	412590000	789040000	797550000	1200900000	1010600000	904960000	958010000	979930000	871730000	935350000	855820000	1009100000	799530000	774260000	787740000	1188300000	987850000	781480000
CAST	XP_020936607.1;XP_020936580.1;XP_020936555.1;XP_020936664.1;XP_020936657.1;XP_020936645.1;XP_020936631.1;XP_020936625.1;XP_020936600.1	XP_020936607.1;XP_020936580.1;XP_020936555.1;XP_020936664.1;XP_020936657.1;XP_020936645.1;XP_020936631.1;XP_020936625.1;XP_020936600.1	XP_020936607.1 calpastatin isoform X12 GN=CAST [Sus scrofa];XP_020936580.1 calpastatin isoform X7 GN=CAST [Sus scrofa];XP_020936555.1 calpastatin isoform X2 GN=CAST [Sus scrofa];XP_020936664.1 calpastatin isoform X25 GN=CAST [Sus scrofa];XP_020936657.1 cal	0	24	18824000000	905930000	817860000	1041800000	708890000	1054100000	966640000	977120000	575540000	267890000	536420000	237160000	787340000	324480000	690060000	1264000000	494700000	649320000	1472000000	1000200000	276020000	817870000	671670000	590050000	597780000	431660000	667490000	951810000	1074100000	1084700000	892640000	749080000	932450000	939260000	922520000	950510000	705240000	771300000	913020000	814650000	884110000	1087300000	753230000	987790000
CALU	XP_003484071.1	XP_003484071.1	XP_003484071.1 calumenin isoform X1 GN=CALU [Sus scrofa]	5	21	18759000000	744490000	737670000	1129100000	793420000	515170000	1227500000	1106800000	710400000	340900000	524570000	280410000	648490000	272700000	472740000	1599800000	818110000	528940000	994360000	752980000	411030000	920220000	843550000	761780000	399050000	394720000	829800000	878530000	872350000	1022100000	1004300000	750760000	1057600000	1016000000	960140000	948940000	963410000	1098400000	836030000	911560000	921330000	1301800000	1035400000	854820000
STOM	XP_020923940.1	XP_020923940.1	XP_020923940.1 erythrocyte band 7 integral membrane protein GN=STOM [Sus scrofa]	12	12	18693000000	746190000	952020000	1047200000	681910000	898400000	772490000	836540000	616480000	323820000	662440000	281950000	825000000	376860000	652370000	812070000	716390000	1099000000	948060000	873980000	307960000	1012900000	689880000	872160000	381290000	743730000	562390000	763760000	1065000000	1005800000	732610000	1095100000	644370000	761700000	953760000	1086400000	987090000	1076600000	1258700000	1046700000	970920000	604940000	964570000	1435100000
ITGA1	XP_020932428.1	XP_020932428.1	XP_020932428.1 LOW QUALITY PROTEIN: integrin alpha-1 GN=ITGA1 [Sus scrofa]	34	34	18647000000	573750000	729320000	553490000	481230000	781520000	753710000	1233600000	601270000	302690000	546790000	368330000	1046800000	273930000	422380000	1242300000	730930000	712050000	784640000	672580000	204140000	1462400000	1064800000	826180000	281560000	811950000	1184700000	654540000	973880000	667690000	661040000	957030000	784310000	1162900000	768280000	778460000	781570000	1123300000	1133200000	926030000	609530000	1061900000	993110000	1052800000
SYNPO2	XP_020956357.1;XP_020956358.1	XP_020956357.1;XP_020956358.1	XP_020956357.1 synaptopodin-2 isoform X1 GN=SYNPO2 [Sus scrofa];XP_020956358.1 synaptopodin-2 isoform X2 GN=SYNPO2 [Sus scrofa]	50	50	18558000000	1022500000	875160000	979160000	872330000	1229600000	1389300000	869590000	793870000	352190000	398590000	214320000	581370000	196580000	454540000	1557800000	706220000	486980000	923280000	777340000	280490000	1045000000	551200000	875340000	425760000	277910000	421680000	1018100000	1041400000	964300000	1048200000	1301800000	1129800000	918010000	1066800000	944970000	690930000	797080000	809060000	806930000	859860000	1140900000	1044500000	842190000
DDX3X	NP_001233132.1;XP_005673618.1;XP_020932240.1;XP_020932239.1;XP_020932238.1;NP_001278611.1;XP_020932237.1;XP_020932236.1	NP_001233132.1;XP_005673618.1	NP_001233132.1 ATP-dependent RNA helicase DDX3X GN=DDX3X [Sus scrofa];XP_005673618.1 ATP-dependent RNA helicase DDX3X isoform X1 GN=DDX3X [Sus scrofa]	4	36	18329000000	746100000	801360000	883940000	758060000	645770000	958460000	772000000	671590000	347330000	564400000	289230000	681760000	300710000	723940000	1381700000	622360000	513050000	742720000	781280000	525420000	980810000	875200000	778900000	525170000	624620000	833240000	874530000	891230000	1003600000	891930000	797970000	814850000	839400000	920970000	905080000	858680000	931100000	853980000	852240000	901480000	1184100000	1003500000	770990000
ITIH2	NP_999068.1;CON__Q9TRI1	NP_999068.1	NP_999068.1 inter-alpha-trypsin inhibitor heavy chain H2 precursor GN=ITIH2 [Sus scrofa]	25	25	18272000000	538480000	425830000	532210000	1703100000	866700000	547510000	779170000	827570000	256290000	753490000	242110000	734380000	1082900000	3672500000	577010000	655180000	414200000	407520000	597890000	642150000	566630000	292780000	295370000	206420000	318440000	336570000	576760000	503510000	607700000	1736300000	975710000	565500000	739860000	1064700000	910820000	1238700000	892030000	1031600000	2666100000	4099900000	445660000	873630000	663830000
RAB7A	XP_020925095.1;XP_020925094.1;XP_020925093.1;XP_020925092.1;XP_020925090.1;XP_020925096.1	XP_020925095.1;XP_020925094.1;XP_020925093.1;XP_020925092.1;XP_020925090.1;XP_020925096.1	XP_020925095.1 ras-related protein Rab-7a isoform X1 GN=RAB7A [Sus scrofa];XP_020925094.1 ras-related protein Rab-7a isoform X1 GN=RAB7A [Sus scrofa];XP_020925093.1 ras-related protein Rab-7a isoform X1 GN=RAB7A [Sus scrofa];XP_020925092.1 ras-related prot	3	18	18259000000	781800000	967880000	923400000	628710000	653810000	979190000	961750000	575690000	342620000	566980000	396770000	806830000	309770000	637440000	1093700000	527300000	546590000	776810000	791500000	360260000	1037800000	720660000	771070000	536640000	608970000	955160000	810300000	1113000000	902510000	790560000	877240000	855550000	911330000	855450000	1034100000	966180000	1302600000	1059200000	1137400000	908470000	882640000	762040000	948450000
CSE1L	NP_001230144.1	NP_001230144.1	NP_001230144.1 exportin-2 GN=CSE1L [Sus scrofa]	39	39	18183000000	523610000	444370000	541330000	354310000	394540000	551130000	539670000	403060000	176770000	359110000	146430000	433450000	118760000	357710000	578290000	270920000	356820000	444320000	502840000	183840000	454750000	379750000	8657100000	319210000	339220000	351600000	925140000	956030000	1071900000	918940000	770650000	893630000	922330000	985980000	1049900000	1019200000	1045300000	916520000	896460000	844910000	881330000	804690000	880460000
CS	XP_020946803.1;NP_999441.1;XP_020946802.1;XP_020946806.1;XP_020946804.1	XP_020946803.1;NP_999441.1;XP_020946802.1;XP_020946806.1;XP_020946804.1	XP_020946803.1 citrate synthase, mitochondrial isoform X2 GN=CS [Sus scrofa];NP_999441.1 citrate synthase, mitochondrial precursor GN=CS [Sus scrofa];XP_020946802.1 citrate synthase, mitochondrial isoform X1 GN=CS [Sus scrofa];XP_020946806.1 citrate syntha	21	21	18174000000	742700000	727910000	818610000	740410000	748820000	918070000	858920000	700220000	394280000	613530000	336420000	762060000	268130000	702810000	1189600000	608680000	558830000	729370000	701860000	468840000	946310000	809370000	822540000	688250000	591780000	726140000	882790000	908090000	887760000	891250000	840940000	884590000	905820000	952110000	1027600000	926790000	1033100000	941730000	887880000	955760000	1057200000	888780000	882740000
H3C12	XP_020955496.1;XP_013844399.1;NP_001274345.1;XP_020955685.1	XP_020955496.1;XP_013844399.1;NP_001274345.1;XP_020955685.1	XP_020955496.1 histone H3.1 GN=LOC110261664 [Sus scrofa];XP_013844399.1 histone H3.1 GN=LOC106504121 [Sus scrofa];NP_001274345.1 histone H3.1 GN=HIST1H3E [Sus scrofa];XP_020955685.1 uncharacterized protein LOC110261735 GN=LOC110261735 [Sus scrofa]	1	1	18138000000	1077000000	884930000	103460000	703000000	813460000	1031900000	851140000	762460000	3259500	272000000	12771000	624560000	0	443180000	584720000	633820000	4205000000	1802400000	1089600000	183170000	1187400000	92617000	545350000	4279200	80300000	146140000	1187400000	1042200000	90088000	906720000	1060600000	937130000	888820000	887020000	0	362850000	45704000	682150000	0	554960000	488870000	830330000	5891500000
PCBP2	XP_005652579.1;XP_020946849.1;XP_005652585.1;XP_020946847.1;XP_005652592.1;XP_020946851.1;XP_005652584.1;XP_013839282.1;XP_020946852.1;XP_005652597.1;XP_020946848.1;XP_020926749.1;XP_020926744.1;XP_020926745.1;XP_020926746.1;XP_020926747.1;XP_020926750.1;XP_020926748.1	XP_005652579.1;XP_020946849.1;XP_005652585.1;XP_020946847.1;XP_005652592.1;XP_020946851.1;XP_005652584.1;XP_013839282.1;XP_020946852.1;XP_005652597.1;XP_020946848.1	XP_005652579.1 poly(rC)-binding protein 2 isoform X3 GN=PCBP2 [Sus scrofa];XP_020946849.1 poly(rC)-binding protein 2 isoform X32 GN=PCBP2 [Sus scrofa];XP_005652585.1 poly(rC)-binding protein 2 isoform X10 GN=PCBP2 [Sus scrofa];XP_020946847.1 poly(rC)-bindi	0	11	18080000000	626620000	671090000	862540000	822560000	723740000	1027900000	940310000	803240000	345710000	676380000	253640000	774400000	247560000	660770000	1282200000	603760000	548300000	796670000	764380000	355980000	837020000	931300000	686450000	513580000	519240000	804660000	960770000	866840000	878200000	1006400000	906130000	998900000	972810000	1028300000	976770000	944700000	889270000	893900000	827640000	881110000	1166100000	916890000	836630000
NES	XP_005663322.1	XP_005663322.1	XP_005663322.1 nestin GN=NES [Sus scrofa]	62	62	18071000000	474510000	510150000	817460000	477330000	307310000	910820000	722070000	739530000	291180000	442180000	191310000	349950000	217190000	411210000	2780700000	651180000	515080000	1209800000	604400000	505410000	1359700000	800000000	804000000	638210000	414660000	925700000	579600000	693800000	900890000	714100000	547360000	797830000	739080000	1009000000	926450000	616260000	615760000	601700000	793080000	661650000	1993400000	978760000	815010000
SEC31A	XP_020957516.1;XP_020957515.1;XP_020957479.1;XP_020957480.1;XP_020957488.1;XP_020957491.1;XP_020957492.1;XP_020957493.1;XP_020957497.1;XP_020957498.1;XP_020957503.1;XP_020957504.1;XP_020957502.1;XP_020957506.1;XP_020957507.1;XP_020957477.1;XP_020957478.1	XP_020957516.1;XP_020957515.1;XP_020957479.1;XP_020957480.1;XP_020957488.1;XP_020957491.1;XP_020957492.1;XP_020957493.1;XP_020957497.1;XP_020957498.1;XP_020957503.1;XP_020957504.1;XP_020957502.1;XP_020957506.1;XP_020957507.1;XP_020957477.1;XP_020957478.1	XP_020957516.1 protein transport protein Sec31A isoform X26 GN=SEC31A [Sus scrofa];XP_020957515.1 protein transport protein Sec31A isoform X26 GN=SEC31A [Sus scrofa];XP_020957479.1 protein transport protein Sec31A isoform X8 GN=SEC31A [Sus scrofa];XP_02095	1	36	18020000000	834580000	765480000	969760000	720050000	613730000	1041200000	841670000	833080000	311130000	558310000	228880000	682360000	245650000	699800000	1212500000	637650000	498680000	800900000	804400000	367940000	958280000	845840000	748140000	548060000	489340000	762630000	932830000	882460000	977980000	841820000	735000000	930230000	838580000	999470000	958490000	906240000	902240000	743770000	915890000	813320000	999820000	892660000	747890000
PGRMC1	NP_999076.1	NP_999076.1	NP_999076.1 membrane-associated progesterone receptor component 1 GN=PGRMC1 [Sus scrofa]	11	12	17975000000	516290000	721790000	856460000	595980000	779470000	1120400000	969410000	495640000	265390000	570730000	316320000	812090000	251950000	591770000	1466300000	442770000	564860000	1009500000	723070000	427200000	893910000	750940000	892910000	583340000	578860000	777750000	539270000	841650000	976090000	662040000	859710000	935800000	925500000	699560000	738140000	844440000	994430000	880730000	633960000	643130000	1135900000	711770000	759390000
COX5A	XP_005666204.1	XP_005666204.1	XP_005666204.1 cytochrome c oxidase subunit 5A, mitochondrial GN=COX5A [Sus scrofa]	7	7	17897000000	895160000	944590000	1034300000	643060000	828810000	1159300000	968190000	522310000	305750000	463530000	185640000	613870000	189320000	525970000	1437100000	756840000	624070000	1045000000	776370000	425170000	831630000	632290000	597690000	414190000	492550000	583980000	853670000	980710000	938200000	756110000	773060000	972860000	899650000	841390000	970040000	880910000	963570000	803020000	657300000	873270000	1047700000	1110100000	944150000
SFTPA1	NP_001335888.1;NP_999430.1	NP_001335888.1;NP_999430.1	NP_001335888.1 pulmonary surfactant-associated protein A precursor GN=SFTPA1 [Sus scrofa];NP_999430.1 pulmonary surfactant-associated protein A precursor GN=SFTPA1 [Sus scrofa]	6	6	17884000000	1146800000	531550000	902780000	167290000	917580000	596850000	801020000	828580000	287530000	575730000	41931000	787530000	209620000	734850000	784790000	65993000	643650000	344840000	696340000	724890000	1270700000	173230000	738050000	1281900000	697000000	1932800000	1105400000	567550000	943780000	682710000	902320000	611790000	883950000	978360000	757630000	872900000	673240000	888240000	675830000	866720000	679150000	361070000	859730000
MYO1B	XP_020931625.1;XP_020931623.1;XP_020931622.1;XP_020931621.1;XP_020931620.1;XP_020931619.1;XP_020931618.1;XP_020931617.1;XP_020931616.1;XP_020931615.1;XP_020929384.1;XP_020929383.1;XP_020929382.1	XP_020931625.1;XP_020931623.1;XP_020931622.1;XP_020931621.1;XP_020931620.1;XP_020931619.1;XP_020931618.1;XP_020931617.1;XP_020931616.1;XP_020931615.1	XP_020931625.1 unconventional myosin-Ib isoform X6 GN=MYO1B [Sus scrofa];XP_020931623.1 unconventional myosin-Ib isoform X6 GN=MYO1B [Sus scrofa];XP_020931622.1 unconventional myosin-Ib isoform X5 GN=MYO1B [Sus scrofa];XP_020931621.1 unconventional myosin-	38	44	17816000000	670270000	621320000	838390000	606120000	515640000	876970000	915010000	709150000	338340000	671120000	328020000	732140000	256650000	487140000	1171700000	545880000	472880000	1076700000	775410000	414540000	1164200000	865220000	736810000	598460000	492030000	936280000	860760000	790290000	909220000	807070000	687230000	802340000	951730000	905510000	1029600000	978200000	1269600000	867310000	836350000	776510000	929960000	919510000	879100000
PRKAR2A	NP_999423.2	NP_999423.2	NP_999423.2 cAMP-dependent protein kinase type II-alpha regulatory subunit GN=PRKAR2A [Sus scrofa]	21	22	17762000000	877850000	748360000	916920000	735750000	789220000	1054000000	839490000	582650000	286470000	601100000	261700000	779490000	266250000	626460000	1093000000	585610000	622690000	874060000	782230000	334030000	818710000	700260000	701580000	643070000	505860000	735060000	927270000	847170000	929300000	801860000	902010000	908470000	908980000	786800000	803240000	861660000	822340000	915160000	744960000	764740000	900540000	881650000	870320000
ATP1A1	XP_020944376.1;NP_999414.1;NP_001165224.1;XP_020948935.1;XP_020945235.1;NP_999456.1;XP_005653908.1;XP_020949229.1;XP_020949228.1;XP_020949227.1;XP_020949226.1	XP_020944376.1;NP_999414.1	XP_020944376.1 sodium/potassium-transporting ATPase subunit alpha-1 isoform X1 GN=ATP1A1 [Sus scrofa];NP_999414.1 sodium/potassium-transporting ATPase subunit alpha-1 precursor GN=ATP1A1 [Sus scrofa]	22	31	17736000000	422610000	729670000	996890000	503370000	620190000	883480000	907030000	548390000	304050000	628900000	261290000	881110000	317180000	652550000	1142200000	538820000	557380000	847030000	753360000	358490000	984200000	1009300000	784940000	445230000	648490000	1009600000	695640000	960750000	1003600000	637680000	785190000	880760000	944030000	714300000	865010000	892180000	953210000	928000000	999920000	828440000	967730000	913420000	1011800000
HNRNPAB	NP_001106165.1;XP_020932286.1	NP_001106165.1;XP_020932286.1	NP_001106165.1 heterogeneous nuclear ribonucleoprotein A/B GN=HNRNPAB [Sus scrofa];XP_020932286.1 heterogeneous nuclear ribonucleoprotein A/B isoform X1 GN=HNRNPAB [Sus scrofa]	10	10	17712000000	767370000	672680000	968970000	705110000	738030000	765720000	635320000	746540000	415890000	629100000	312060000	776240000	325230000	689350000	1217700000	589720000	473860000	719480000	694230000	530670000	827020000	757140000	806640000	676840000	614330000	656640000	740470000	814300000	927680000	827350000	773370000	962920000	970380000	890520000	972660000	823120000	820730000	842870000	890080000	869570000	963540000	856200000	794930000
B2M	XP_020952021.1;NP_999143.1	XP_020952021.1;NP_999143.1	XP_020952021.1 beta-2-microglobulin GN=B2M [Sus scrofa];NP_999143.1 beta-2-microglobulin precursor GN=B2M [Sus scrofa]	3	3	17685000000	1001700000	890240000	836750000	750530000	861300000	930800000	1041900000	667800000	237770000	502750000	223760000	849460000	267000000	740920000	866270000	541440000	519090000	560420000	767150000	478460000	829690000	765800000	534940000	355480000	582280000	1081600000	1094400000	1017900000	500090000	1128200000	871660000	1045400000	1506100000	845240000	0	863330000	0	1261300000	0	1319700000	1006800000	624370000	603820000
EPRS1	XP_020919974.1;XP_020919973.1	XP_020919974.1;XP_020919973.1	XP_020919974.1 bifunctional glutamate/proline--tRNA ligase isoform X2 GN=EPRS1 [Sus scrofa];XP_020919973.1 bifunctional glutamate/proline--tRNA ligase isoform X1 GN=EPRS1 [Sus scrofa]	62	62	17651000000	915310000	784840000	1035500000	811080000	492450000	1075500000	749360000	731450000	311760000	562300000	213090000	581950000	202060000	590100000	1609400000	774120000	478030000	767040000	839980000	319640000	727660000	831680000	710830000	486700000	431270000	617790000	965330000	813890000	1016400000	892600000	725370000	885700000	764580000	900860000	1029400000	939010000	977020000	825050000	906410000	820540000	1103300000	877290000	765610000
RTCB	NP_001116458.1	NP_001116458.1	NP_001116458.1 tRNA-splicing ligase RtcB homolog GN=RTCB [Sus scrofa]	22	22	17606000000	764110000	727790000	1057200000	851990000	660940000	976340000	852830000	656290000	297090000	551790000	238730000	614240000	284770000	600940000	1123000000	602080000	544750000	908690000	793560000	314060000	845080000	665460000	737420000	645810000	482680000	808510000	847630000	836700000	1050500000	881700000	774320000	856850000	844790000	866550000	963780000	805670000	996610000	779560000	929590000	785250000	998420000	918250000	871300000
ITIH1	NP_999089.2	NP_999089.2	NP_999089.2 inter-alpha-trypsin inhibitor heavy chain H1 precursor GN=ITIH1 [Sus scrofa]	27	30	17562000000	367040000	365700000	536880000	1824000000	857200000	450670000	705880000	690200000	298290000	792770000	307890000	778110000	1061200000	3745900000	399230000	385630000	408420000	444300000	490720000	724150000	645780000	175690000	275730000	183760000	305950000	340940000	522800000	472020000	663710000	1920600000	965190000	453300000	765910000	855800000	794980000	1155600000	1005400000	999760000	2985300000	4283900000	414910000	628250000	635460000
COL4A2	XP_020921568.1;XP_020921567.1	XP_020921568.1;XP_020921567.1	XP_020921568.1 collagen alpha-2(IV) chain GN=COL4A2 [Sus scrofa];XP_020921567.1 collagen alpha-2(IV) chain GN=COL4A2 [Sus scrofa]	12	12	17534000000	372850000	589320000	473500000	507150000	1074200000	813880000	1008900000	401050000	223820000	370480000	387880000	1356100000	312740000	381270000	1472600000	540500000	575440000	1391400000	555360000	228200000	1245800000	401050000	922980000	185790000	538280000	1203200000	452190000	687030000	575290000	613450000	1191300000	726910000	908990000	549710000	625060000	512110000	1202500000	1610700000	882680000	497530000	1208700000	750240000	758950000
CA4	NP_001230849.1	NP_001230849.1	NP_001230849.1 carbonic anhydrase 4 precursor GN=CA4 [Sus scrofa]	9	9	17496000000	690770000	755730000	1344300000	417500000	545100000	1269400000	1153900000	544000000	226760000	481210000	278160000	328990000	185120000	742680000	49579000	206110000	924180000	1116200000	788420000	217070000	570380000	461430000	1220700000	783920000	278870000	1915800000	683960000	1119000000	1512700000	533040000	724610000	1171800000	1106900000	696860000	682490000	723460000	1003000000	542050000	503300000	818840000	84578000	282920000	1247700000
GIMAP4	XP_020934572.1;XP_013846200.2	XP_020934572.1;XP_013846200.2	XP_020934572.1 GTPase IMAP family member 4 GN=GIMAP4 [Sus scrofa];XP_013846200.2 GTPase IMAP family member 4 GN=GIMAP4 [Sus scrofa]	18	18	17398000000	904340000	1100800000	1008300000	661570000	723630000	939270000	1049700000	542720000	346380000	922030000	355690000	956630000	246850000	634230000	480920000	379610000	471270000	487910000	981910000	258300000	697090000	829220000	539150000	452660000	725400000	702390000	1071500000	1362700000	950180000	743150000	818130000	926290000	1063500000	727140000	1054000000	1370200000	1224900000	1108500000	866430000	784490000	421320000	636780000	797750000
PRKAR1A	XP_005656989.1;XP_020921872.1;NP_999191.1	XP_005656989.1;XP_020921872.1;NP_999191.1	XP_005656989.1 cAMP-dependent protein kinase type I-alpha regulatory subunit isoform X1 GN=PRKAR1A [Sus scrofa];XP_020921872.1 cAMP-dependent protein kinase type I-alpha regulatory subunit isoform X1 GN=PRKAR1A [Sus scrofa];NP_999191.1 cAMP-dependent prote	17	20	17383000000	806220000	828870000	679280000	782750000	643200000	917220000	988280000	637500000	316080000	520270000	293180000	656070000	234330000	639330000	1118400000	717230000	577930000	886280000	648420000	515970000	908440000	762300000	632430000	540760000	439370000	692580000	942280000	975570000	766820000	911480000	779190000	886230000	949460000	860830000	998160000	869100000	1145500000	816110000	844840000	868940000	966480000	888740000	911560000
-	REV__XP_003131484.1;REV__CON__ENSEMBL:ENSP00000377550;REV__CON__P19012;REV__CON__P13646-1	REV__XP_003131484.1;REV__CON__ENSEMBL:ENSP00000377550;REV__CON__P19012;REV__CON__P13646-1	XP_003131484.1 keratin, type I cytoskeletal 13 GN=LOC100515166 [Sus scrofa];;;	2	2	17340000000	618960000	1388300000	2103100000	1830400000	1385400000	0	878230000	353590000	398010000	621750000	672800000	726130000	1492000	196350000	0	599040000	475960000	984560000	692670000	325940000	23742000	576150000	1036200000	681550000	327400000	442630000	0	0	0	0	0	0	0	0	0	0	0	0	0	0	0	0	0
LIMS1	XP_005662376.1;XP_020941301.1;XP_005662374.1;XP_020941306.1	XP_005662376.1;XP_020941301.1;XP_005662374.1	XP_005662376.1 LIM and senescent cell antigen-like-containing domain protein 1 isoform X2 GN=LIMS1 [Sus scrofa];XP_020941301.1 LIM and senescent cell antigen-like-containing domain protein 1 isoform X1 GN=LIMS1 [Sus scrofa];XP_005662374.1 LIM and senescent	4	19	17340000000	961080000	826500000	232710000	1036700000	830080000	1110900000	943400000	637120000	256960000	529450000	197870000	674650000	201110000	474560000	1147900000	478430000	576490000	975400000	1091000000	298950000	726780000	762670000	729080000	693520000	284770000	662270000	1045800000	1059100000	271860000	1211100000	903750000	989400000	952500000	912090000	776930000	886370000	620400000	933880000	688110000	712190000	977770000	670020000	886930000
NAXD	NP_001230350.1;NP_001230351.1;XP_020920752.1	NP_001230350.1;NP_001230351.1;XP_020920752.1	NP_001230350.1 ATP-dependent (S)-NAD(P)H-hydrate dehydratase isoform 1 GN=NAXD [Sus scrofa];NP_001230351.1 ATP-dependent (S)-NAD(P)H-hydrate dehydratase isoform 2 GN=NAXD [Sus scrofa];XP_020920752.1 ATP-dependent (S)-NAD(P)H-hydrate dehydratase isoform X1	19	19	17262000000	769120000	689090000	877340000	840070000	758110000	899970000	849540000	671640000	303910000	590130000	315970000	871350000	214110000	532660000	1071100000	390390000	584890000	592680000	716340000	425460000	898320000	766930000	575850000	610140000	525850000	921000000	872420000	897490000	1009800000	981900000	972320000	828250000	816050000	898350000	1014400000	897880000	1170300000	1075700000	890800000	763950000	933890000	656490000	842770000
SEPTIN9	XP_005653913.2	XP_005653913.2	XP_005653913.2 LOW QUALITY PROTEIN: septin-9 GN=SEPTIN9 [Sus scrofa]	25	25	17178000000	768240000	578420000	970710000	800250000	863980000	1109200000	780170000	570140000	294720000	541800000	229550000	767040000	255480000	634860000	1096400000	616330000	497740000	861850000	935570000	369190000	754780000	634650000	663240000	604470000	352460000	626650000	906120000	781110000	1043200000	1014100000	958620000	964370000	854980000	823880000	894180000	877980000	855010000	843440000	802370000	787320000	1007500000	902750000	757520000
DCTN1	XP_020943018.1;XP_020943016.1;XP_020943017.1;XP_020943015.1;XP_020943014.1;XP_020943012.1;XP_020943011.1;XP_020943009.1;XP_020943013.1;XP_020943010.1;XP_020943008.1;XP_020943019.1	XP_020943018.1;XP_020943016.1;XP_020943017.1;XP_020943015.1;XP_020943014.1;XP_020943012.1;XP_020943011.1;XP_020943009.1;XP_020943013.1;XP_020943010.1;XP_020943008.1;XP_020943019.1	XP_020943018.1 dynactin subunit 1 isoform X11 GN=DCTN1 [Sus scrofa];XP_020943016.1 dynactin subunit 1 isoform X9 GN=DCTN1 [Sus scrofa];XP_020943017.1 dynactin subunit 1 isoform X10 GN=DCTN1 [Sus scrofa];XP_020943015.1 dynactin subunit 1 isoform X8 GN=DCTN1	56	56	17153000000	778200000	631720000	872700000	716270000	590060000	933860000	913190000	762680000	315780000	659700000	248520000	509520000	236460000	574910000	1181800000	633890000	528960000	699070000	830580000	397030000	877120000	805920000	680370000	635190000	379120000	760700000	865620000	748220000	891210000	887710000	759060000	805640000	882820000	914700000	859750000	823550000	835200000	736450000	817780000	832830000	962770000	860700000	778010000
LMO7	XP_020921386.1;XP_020921341.1;XP_020921382.1;XP_020921381.1;XP_020921387.1;XP_020921363.1;XP_020921338.1;XP_020921339.1;XP_020921344.1;XP_020921337.1;XP_020921350.1;XP_020921351.1;XP_020921354.1;XP_020921342.1;XP_020921345.1;XP_020921367.1;XP_020921346.1;XP_020921372.1;XP_020921349.1;XP_020921343.1;XP_020921348.1;XP_020921352.1;XP_020921353.1;XP_020921340.1;XP_020921355.1;XP_020921357.1;XP_020921…	XP_020921386.1;XP_020921341.1;XP_020921382.1;XP_020921381.1;XP_020921387.1;XP_020921363.1;XP_020921338.1;XP_020921339.1;XP_020921344.1;XP_020921337.1;XP_020921350.1;XP_020921351.1;XP_020921354.1;XP_020921342.1;XP_020921345.1;XP_020921367.1;XP_020921346.1;XP_020921372.1;XP_020921349.1;XP_020921343.1;XP_020921348.1;XP_020921352.1;XP_020921353.1;XP_020921340.1;XP_020921355.1;XP_020921357.1;XP_020921…	XP_020921386.1 LIM domain only protein 7 isoform X38 GN=LMO7 [Sus scrofa];XP_020921341.1 LIM domain only protein 7 isoform X5 GN=LMO7 [Sus scrofa];XP_020921382.1 LIM domain only protein 7 isoform X35 GN=LMO7 [Sus scrofa];XP_020921381.1 LIM domain only prot	57	57	17133000000	857040000	905730000	848290000	800060000	762830000	1145200000	1012200000	482320000	272780000	544960000	298540000	803150000	257040000	406230000	1016200000	365140000	561300000	533570000	639020000	299500000	933090000	769800000	476580000	799660000	399260000	943240000	852600000	952090000	971260000	878060000	851880000	935790000	921080000	665650000	840620000	800070000	996990000	950900000	854570000	627030000	846650000	615620000	871780000
GMPS	XP_020925364.1;XP_013837609.2;XP_020925363.1	XP_020925364.1;XP_013837609.2;XP_020925363.1	XP_020925364.1 GMP synthase isoform X3 GN=GMPS [Sus scrofa];XP_013837609.2 GMP synthase isoform X2 GN=GMPS [Sus scrofa];XP_020925363.1 GMP synthase isoform X1 GN=GMPS [Sus scrofa]	21	21	17066000000	1247100000	1021900000	379400000	1129400000	553380000	640260000	360850000	1174100000	494760000	594290000	211730000	439400000	742310000	724730000	403390000	1111200000	1085700000	879860000	532880000	19566000	348080000	1029600000	754000000	452740000	314220000	420980000	1145700000	1028300000	1116600000	1033700000	749570000	973440000	840800000	1019400000	934100000	1110100000	853860000	895050000	882250000	1006500000	1103500000	975930000	943720000
JUP	NP_999488.1	NP_999488.1	NP_999488.1 junction plakoglobin GN=JUP [Sus scrofa]	34	39	17026000000	638680000	832390000	750140000	717880000	675030000	1033500000	1051300000	700820000	274270000	576470000	276110000	736810000	347680000	548430000	1062000000	428060000	559480000	685910000	642830000	367240000	857700000	869230000	642950000	611260000	351030000	789120000	719440000	970380000	864530000	983120000	869150000	939280000	1056700000	975420000	906320000	825620000	994450000	953870000	884610000	809900000	893560000	739110000	850080000
PFKP	XP_020920725.1	XP_020920725.1	XP_020920725.1 ATP-dependent 6-phosphofructokinase, platelet type GN=PFKP [Sus scrofa]	26	28	16979000000	1101300000	825450000	760180000	695080000	574700000	1131300000	999850000	610520000	248500000	512850000	242980000	640920000	277770000	575570000	1185800000	515560000	587640000	794910000	646900000	271170000	761230000	841120000	614250000	546670000	328220000	688390000	1040200000	935040000	839200000	845800000	769300000	938210000	943890000	843780000	885900000	893740000	908310000	843710000	881620000	855590000	954610000	903320000	843330000
AP2A1	XP_020950419.1;XP_020950417.1	XP_020950419.1;XP_020950417.1	XP_020950419.1 AP-2 complex subunit alpha-1 isoform X2 GN=AP2A1 [Sus scrofa];XP_020950417.1 AP-2 complex subunit alpha-1 isoform X1 GN=AP2A1 [Sus scrofa]	38	42	16951000000	960300000	598010000	975120000	748720000	769800000	827750000	770060000	645520000	290990000	735110000	272960000	768460000	284630000	507830000	1125500000	442770000	458110000	870230000	652430000	300420000	847540000	718390000	677340000	488330000	404740000	810200000	984180000	873830000	866400000	784550000	738940000	867270000	826560000	930920000	1031300000	962500000	1117300000	829480000	1005700000	799260000	843190000	807410000	898550000
UBE2N	XP_005664319.2;XP_013847980.1	XP_005664319.2	XP_005664319.2 LOW QUALITY PROTEIN: ubiquitin-conjugating enzyme E2 N GN=UBE2N [Sus scrofa]	9	9	16928000000	825700000	717140000	1022500000	705170000	646600000	1041500000	904050000	594610000	302570000	498840000	298250000	603560000	265470000	621740000	1111000000	505240000	589490000	761320000	785150000	354050000	752720000	610800000	657350000	608490000	456340000	688590000	869640000	947820000	1068100000	785410000	804260000	849410000	825940000	797570000	838160000	792260000	957310000	775800000	866650000	814270000	921860000	762230000	853300000
PHB1	XP_020922794.1;XP_013836451.2;XP_005668921.2;XP_003131608.4	XP_020922794.1;XP_013836451.2;XP_005668921.2;XP_003131608.4	XP_020922794.1 prohibitin GN=PHB [Sus scrofa];XP_013836451.2 prohibitin GN=PHB [Sus scrofa];XP_005668921.2 prohibitin GN=PHB [Sus scrofa];XP_003131608.4 prohibitin GN=PHB [Sus scrofa]	20	20	16837000000	699100000	762430000	872490000	685070000	645590000	966020000	848660000	638440000	309050000	551400000	298040000	687730000	270050000	546170000	979000000	560370000	580460000	737440000	764280000	393920000	848910000	713800000	700610000	613400000	503490000	661460000	823820000	868980000	922210000	866560000	763530000	875880000	818190000	841340000	966430000	866430000	1053100000	837120000	908700000	790950000	856240000	837460000	880340000
CTTN	XP_020938314.1;XP_020938313.1;XP_020938310.1;XP_020938309.1;XP_020938308.1;XP_020938307.1;XP_020938306.1;XP_020938318.1;XP_020938317.1;XP_020938316.1;XP_020938315.1;XP_020938312.1;XP_020938311.1	XP_020938314.1;XP_020938313.1;XP_020938310.1;XP_020938309.1;XP_020938308.1;XP_020938307.1;XP_020938306.1;XP_020938318.1;XP_020938317.1;XP_020938316.1;XP_020938315.1;XP_020938312.1;XP_020938311.1	XP_020938314.1 src substrate cortactin isoform X2 GN=CTTN [Sus scrofa];XP_020938313.1 src substrate cortactin isoform X2 GN=CTTN [Sus scrofa];XP_020938310.1 src substrate cortactin isoform X2 GN=CTTN [Sus scrofa];XP_020938309.1 src substrate cortactin isof	19	19	16829000000	717230000	638840000	941930000	767020000	561360000	880230000	854880000	637080000	337200000	491130000	275950000	660280000	227460000	609710000	1373900000	499810000	585280000	673540000	687000000	325840000	879180000	756840000	663490000	593510000	377180000	813310000	754080000	750120000	955210000	891430000	712820000	816620000	834870000	839170000	878360000	769830000	847830000	790230000	710550000	840810000	1109800000	847630000	865430000
CFH	XP_020937502.1;XP_020937501.1;XP_020937504.1;XP_020937503.1;XP_020937505.1	XP_020937502.1;XP_020937501.1;XP_020937504.1;XP_020937503.1;XP_020937505.1	XP_020937502.1 complement factor H isoform X2 GN=CFH [Sus scrofa];XP_020937501.1 complement factor H isoform X1 GN=CFH [Sus scrofa];XP_020937504.1 complement factor H isoform X4 GN=CFH [Sus scrofa];XP_020937503.1 complement factor H isoform X3 GN=CFH [Sus	1	47	16818000000	770060000	419860000	278590000	1091400000	797850000	458150000	677270000	1132200000	339390000	665760000	160460000	665230000	737880000	2293800000	473130000	678300000	766230000	566590000	662180000	389230000	579930000	563560000	471120000	307440000	386010000	485990000	894320000	592360000	389710000	1177500000	922820000	467280000	642480000	1197200000	983520000	955260000	667180000	866700000	1989000000	2564500000	488910000	984640000	1143700000
CLU	XP_020927747.1;XP_020927746.1;XP_020927745.1;XP_020927744.1;XP_020927743.1;XP_020927741.1;XP_020927740.1;NP_999136.1;CON__P17697;XP_020937415.1	XP_020927747.1;XP_020927746.1;XP_020927745.1;XP_020927744.1;XP_020927743.1;XP_020927741.1;XP_020927740.1;NP_999136.1	XP_020927747.1 clusterin isoform X2 GN=CLU [Sus scrofa];XP_020927746.1 clusterin isoform X2 GN=CLU [Sus scrofa];XP_020927745.1 clusterin isoform X2 GN=CLU [Sus scrofa];XP_020927744.1 clusterin isoform X2 GN=CLU [Sus scrofa];XP_020927743.1 clusterin isoform	1	18	16795000000	548090000	497940000	634900000	1100800000	734120000	642350000	445620000	647200000	336100000	595730000	284420000	667310000	851230000	1979500000	429440000	573340000	596600000	528520000	544140000	586640000	686800000	563910000	545800000	348520000	489950000	935830000	655620000	662630000	661200000	1281000000	842860000	690180000	569100000	865200000	944670000	954390000	889950000	923690000	2328100000	2560200000	465340000	943310000	878190000
KCTD12	XP_020921390.1;XP_020940614.1;XP_020940613.1;XP_020940612.1;XP_020940611.1;XP_020940610.1;XP_020940609.1	XP_020921390.1	XP_020921390.1 BTB/POZ domain-containing protein KCTD12 GN=KCTD12 [Sus scrofa]	20	20	16790000000	735510000	606220000	937050000	880320000	601700000	1523200000	870920000	633500000	366580000	689870000	313730000	562990000	444070000	628420000	988510000	459170000	429430000	548540000	662020000	290210000	845100000	576590000	564500000	364560000	506030000	761230000	825220000	798730000	944090000	1011700000	745530000	1283700000	908000000	807820000	1077700000	1006500000	1006700000	755370000	1189900000	835810000	885800000	720530000	672700000
G6PD	XP_020936403.1	XP_020936403.1	XP_020936403.1 glucose-6-phosphate 1-dehydrogenase isoform X1 GN=G6PD [Sus scrofa]	1	34	16752000000	951390000	886480000	817890000	532620000	633540000	1023800000	904830000	699950000	345520000	907140000	238680000	643470000	349940000	541430000	838900000	421150000	590890000	556870000	722160000	231660000	963130000	667330000	565310000	512330000	548540000	656730000	1100800000	1152900000	888430000	622110000	745470000	940000000	957660000	918290000	870090000	1163600000	927260000	894340000	1026200000	858250000	746210000	621070000	933400000
EIF3A	XP_001928377.1	XP_001928377.1	XP_001928377.1 eukaryotic translation initiation factor 3 subunit A GN=EIF3A [Sus scrofa]	61	61	16661000000	953750000	829280000	934530000	593080000	497900000	944180000	862130000	728470000	280960000	570730000	219930000	599670000	220960000	618120000	1177800000	491480000	609490000	647830000	699390000	396610000	714510000	785810000	526710000	484830000	424710000	847800000	929660000	899770000	931730000	744840000	743540000	851620000	760200000	899240000	971530000	871810000	996850000	734450000	772090000	812240000	934300000	727530000	740550000
-	CON__P13645;XP_003131508.1;XP_005668904.1;CON__P02535-1;CON__Q7Z3Y7;CON__Q148H6;NP_001231551.1;XP_003131509.1;CON__Q99456;XP_003131507.2;CON__Q7Z3Y8;XP_003131480.2;CON__A2A5Y0;CON__Q7Z3Y9;CON__O76014;CON__O76015;CON__A2AB72;CON__Q2M2I5;XP_020922673.1;CON__Q14532;XP_020922672.1;CON__Q92764;CON__O76013	CON__P13645		24	32	16642000000	931960000	4693100	43371000	10472000000	38665000	104670000	15513000	620990000	595390000	176690000	29128000	180280000	35580000	18882000	1068900000	155570000	165900000	28381000	321290000	14344000	186310000	46483000	196410000	144190000	114250000	931570000	1126700000	0	18123000	12954000000	46813000	124800000	63731000	803220000	1246500000	281670000	82817000	225480000	88754000	36463000	604110000	248640000	339070000
CORO1C	XP_001929380.1;XP_005670809.2;XP_020923176.1	XP_001929380.1;XP_005670809.2	XP_001929380.1 coronin-1C GN=CORO1C [Sus scrofa];XP_005670809.2 coronin-1C GN=CORO1C [Sus scrofa]	22	22	16631000000	848320000	800940000	779700000	750190000	657830000	985230000	838840000	595690000	263100000	469440000	191610000	636010000	202630000	518100000	1289900000	651510000	595160000	752480000	720600000	473160000	838980000	666210000	698890000	488110000	355520000	562440000	822130000	916230000	800890000	805580000	787200000	868400000	749520000	765680000	710340000	667710000	656720000	772640000	617450000	775670000	1117600000	856030000	752810000
F2	NP_001116457.1;XP_020932497.1;CON__P00735	NP_001116457.1;XP_020932497.1	NP_001116457.1 prothrombin precursor GN=F2 [Sus scrofa];XP_020932497.1 prothrombin isoform X1 GN=F2 [Sus scrofa]	25	25	16630000000	673920000	509740000	650160000	1209900000	954130000	469690000	512960000	883510000	293770000	569140000	193010000	865730000	727220000	1856200000	473990000	707910000	950700000	661490000	664500000	445840000	419590000	379950000	454590000	270990000	462980000	368370000	739400000	563800000	620230000	1192900000	1097700000	488360000	613990000	1092700000	836050000	845490000	710160000	1165300000	2122800000	2432500000	418740000	898110000	1329800000
LTBP4	XP_020950058.1	XP_020950058.1	XP_020950058.1 LOW QUALITY PROTEIN: latent-transforming growth factor beta-binding protein 4 GN=LTBP4 [Sus scrofa]	40	40	16530000000	1134700000	291420000	404880000	1345000000	685220000	1267000000	1472200000	1016800000	350980000	503950000	183060000	393770000	185730000	365260000	1706600000	765400000	324500000	670650000	501490000	288470000	663430000	516080000	637090000	223550000	251430000	381040000	1073500000	534230000	580160000	1380200000	883470000	975340000	1121300000	1212700000	1049900000	743680000	732940000	593200000	720430000	585410000	1175200000	1018400000	595770000
MAOB	XP_013841525.2;NP_001001864.1	XP_013841525.2;NP_001001864.1	XP_013841525.2 amine oxidase B isoform X1 GN=MAOB [Sus scrofa];NP_001001864.1 amine oxidase B GN=MAOB [Sus scrofa]	22	23	16522000000	589470000	607420000	946790000	644470000	752110000	1044400000	963010000	435620000	252600000	496790000	301710000	686210000	244920000	424750000	1074600000	357690000	437260000	886600000	724250000	265090000	945790000	599830000	867630000	574350000	455950000	943110000	663320000	899970000	993310000	772770000	900290000	932190000	890920000	687470000	642080000	753830000	890710000	809910000	690460000	714670000	921120000	696950000	784930000
CAPG	XP_020942956.1;XP_013843340.1;XP_013843339.1;XP_003124998.1;XP_003124997.1;XP_003124996.1;XP_003124995.1	XP_020942956.1;XP_013843340.1;XP_013843339.1;XP_003124998.1;XP_003124997.1;XP_003124996.1;XP_003124995.1	XP_020942956.1 macrophage-capping protein GN=CAPG [Sus scrofa];XP_013843340.1 macrophage-capping protein GN=CAPG [Sus scrofa];XP_013843339.1 macrophage-capping protein GN=CAPG [Sus scrofa];XP_003124998.1 macrophage-capping protein GN=CAPG [Sus scrofa];XP_0	12	12	16455000000	912750000	889160000	861740000	625840000	606550000	851100000	713480000	764580000	302400000	511690000	200360000	651940000	212470000	633650000	965560000	518050000	570540000	642610000	942040000	261240000	783140000	643150000	628760000	480790000	707110000	574000000	1031600000	943350000	1059500000	746500000	730550000	888490000	791370000	890970000	819500000	776070000	669660000	744720000	692460000	766870000	849730000	829760000	807850000
EMILIN1	XP_003125351.2;XP_005662732.2	XP_003125351.2;XP_005662732.2	XP_003125351.2 EMILIN-1 isoform X1 GN=EMILIN1 [Sus scrofa];XP_005662732.2 EMILIN-1 isoform X2 GN=EMILIN1 [Sus scrofa]	31	31	16421000000	548960000	684570000	710770000	511400000	951830000	782780000	988760000	500120000	233530000	303590000	278250000	1276100000	182350000	528460000	755400000	540200000	452230000	1220900000	591880000	146270000	746810000	490270000	1063600000	429060000	648340000	854560000	647340000	811480000	852910000	641900000	1060200000	750790000	990190000	687650000	657360000	549560000	1098800000	1177000000	733330000	563830000	683050000	804690000	720550000
SCGB1A1	XP_003353880.1	XP_003353880.1	XP_003353880.1 uteroglobin GN=SCGB1A1 [Sus scrofa]	3	3	16415000000	559050000	357290000	14052000	157080000	437950000	1164500000	45919000	86107000	59942000	9482300	17039000	1771600000	55436000	0	3593000000	100530000	492490000	517210000	363810000	69294000	1912400000	592450000	905680000	1962000000	878300000	292840000	616110000	433370000	0	220730000	551050000	1110700000	54854000	88505000	179800000	0	65800000	2255200000	192250000	0	3375300000	172140000	688490000
VASP	XP_020950221.1;XP_020950220.1;XP_020950225.1;XP_020950224.1;XP_020950219.1;XP_020950218.1	XP_020950221.1;XP_020950220.1;XP_020950225.1;XP_020950224.1;XP_020950219.1;XP_020950218.1	XP_020950221.1 vasodilator-stimulated phosphoprotein isoform X4 GN=VASP [Sus scrofa];XP_020950220.1 vasodilator-stimulated phosphoprotein isoform X3 GN=VASP [Sus scrofa];XP_020950225.1 vasodilator-stimulated phosphoprotein isoform X8 GN=VASP [Sus scrofa];X	1	15	16411000000	854140000	778990000	868540000	706550000	549780000	968430000	981130000	539210000	283760000	607280000	276890000	634460000	259390000	497650000	1184600000	637290000	629190000	697670000	606210000	242050000	686530000	767450000	539560000	419820000	450530000	743780000	819740000	780170000	818570000	782570000	669980000	749330000	773520000	745130000	907940000	809400000	736440000	695900000	775020000	678090000	913810000	823750000	784240000
ARF4	NP_001041537.1;XP_020924286.1	NP_001041537.1	NP_001041537.1 ADP-ribosylation factor 4 GN=ARF4 [Sus scrofa]	7	8	16408000000	595220000	646980000	893940000	721320000	632010000	689690000	746060000	675760000	245200000	697600000	196000000	762010000	219470000	672740000	1237100000	577350000	583380000	850380000	626240000	396460000	813270000	665510000	675160000	495820000	529280000	563570000	765310000	804110000	987650000	873490000	725080000	815250000	717110000	940790000	551560000	902120000	470490000	788700000	489410000	850720000	1023000000	1004300000	908370000
EHD3	XP_020943317.1	XP_020943317.1	XP_020943317.1 EH domain-containing protein 3 GN=EHD3 [Sus scrofa]	20	32	16407000000	968280000	912700000	911740000	772470000	658250000	1262700000	1044900000	544100000	291450000	572140000	237980000	820920000	295400000	484890000	597000000	367470000	605200000	631840000	680330000	341030000	697870000	644280000	496660000	597460000	392890000	576570000	992650000	955540000	866370000	798630000	756170000	957530000	835700000	770410000	991320000	957430000	1116000000	990960000	978700000	716790000	542630000	641680000	841160000
MYL3	NP_001265702.1	NP_001265702.1	NP_001265702.1 myosin light chain 3 GN=MYL3 [Sus scrofa]	4	6	16388000000	846150000	597610000	1130200000	680110000	869870000	881810000	784310000	595030000	352890000	447780000	196220000	490240000	163150000	473020000	1420000000	727430000	475420000	946160000	729950000	278850000	614140000	750170000	543140000	340950000	458990000	594340000	0	0	0	0	0	0	0	0	0	0	0	0	0	0	0	1315400000	0
HNRNPUL2	XP_005660840.2	XP_005660840.2	XP_005660840.2 LOW QUALITY PROTEIN: heterogeneous nuclear ribonucleoprotein U-like protein 2 GN=HNRNPUL2 [Sus scrofa]	29	29	16363000000	773160000	705290000	786250000	706110000	639890000	1069800000	944720000	656160000	288120000	651850000	226490000	504840000	273280000	413270000	1379800000	525620000	591950000	871820000	756210000	265950000	682620000	534710000	483040000	586200000	340590000	704870000	840370000	808430000	916230000	875800000	786940000	928400000	870590000	878700000	1004300000	819610000	894900000	697170000	783590000	723950000	1070800000	784550000	895760000
EFHD2	XP_003127676.1	XP_003127676.1	XP_003127676.1 EF-hand domain-containing protein D2 GN=EFHD2 [Sus scrofa]	17	18	16360000000	1012400000	870330000	839800000	604610000	661510000	821870000	834780000	588240000	322590000	642440000	389800000	595680000	254700000	527060000	618300000	580190000	753690000	680140000	854210000	246740000	622650000	590560000	622910000	559480000	623820000	641480000	1015500000	962570000	806090000	777100000	770160000	852750000	816380000	748800000	954940000	886280000	1076500000	837170000	837720000	744920000	609990000	757180000	1007700000
ILF2	XP_005663466.1	XP_005663466.1	XP_005663466.1 interleukin enhancer-binding factor 2 GN=ILF2 [Sus scrofa]	20	20	16348000000	700730000	685580000	952790000	595240000	538130000	1014600000	910640000	653580000	309280000	518300000	259850000	627100000	244420000	551070000	1149600000	471090000	507670000	746880000	660360000	429820000	785290000	733020000	621180000	612330000	421630000	647660000	841250000	803170000	1008400000	804320000	667830000	883310000	835460000	903790000	813170000	816820000	870100000	840520000	736330000	755320000	944760000	734660000	823370000
LOC780435	NP_001072152.1;XP_020944414.1;XP_020945722.1;XP_020945721.1;XP_020925486.1	NP_001072152.1;XP_020944414.1;XP_020945722.1	NP_001072152.1 glutathione S-transferase mu 2 GN=LOC780435 [Sus scrofa];XP_020944414.1 glutathione S-transferase mu 2 isoform X1 GN=LOC780435 [Sus scrofa];XP_020945722.1 glutathione S-transferase Mu 1-like GN=LOC110260351 [Sus scrofa]	4	17	16328000000	1120400000	423310000	465170000	1301200000	737050000	1083400000	794840000	595190000	290020000	383500000	390340000	1109100000	196920000	460990000	1233200000	438230000	492970000	667280000	334350000	339510000	841120000	694220000	262830000	613540000	323310000	736000000	1153200000	587250000	475540000	1396500000	826490000	961990000	832160000	776030000	1034700000	672830000	1407800000	1442900000	697600000	799860000	1011200000	659410000	717950000
DNM2	XP_020939475.1;XP_020939468.1;XP_020939465.1;XP_020939460.1	XP_020939475.1;XP_020939468.1;XP_020939465.1;XP_020939460.1	XP_020939475.1 dynamin-2 isoform X17 GN=DNM2 [Sus scrofa];XP_020939468.1 dynamin-2 isoform X10 GN=DNM2 [Sus scrofa];XP_020939465.1 dynamin-2 isoform X7 GN=DNM2 [Sus scrofa];XP_020939460.1 dynamin-2 isoform X2 GN=DNM2 [Sus scrofa]	0	38	16312000000	883350000	724350000	814580000	673350000	571800000	925210000	900650000	679870000	280270000	542620000	321630000	702170000	271890000	626820000	997430000	492770000	532510000	642660000	643370000	349620000	904700000	724890000	522690000	530050000	386970000	666230000	948920000	876550000	878370000	847950000	730770000	824660000	822770000	828560000	941150000	871790000	1046100000	870760000	865420000	783550000	782970000	733820000	842550000
ACO1	XP_003357777.1	XP_003357777.1	XP_003357777.1 cytoplasmic aconitate hydratase GN=ACO1 [Sus scrofa]	41	41	16205000000	717620000	594240000	713120000	741480000	501330000	897970000	759290000	533990000	285120000	605900000	256950000	488420000	250580000	609310000	843000000	521040000	463160000	826420000	849240000	361350000	933890000	793260000	619790000	790590000	565170000	682740000	772200000	778380000	838950000	954750000	650030000	898590000	798600000	789860000	750870000	927690000	861890000	687990000	820070000	886740000	786500000	813160000	731310000
-	CON__Q29443;CON__Q0IIK2	CON__Q29443;CON__Q0IIK2	;	3	3	16191000000	447450000	395510000	616310000	1072600000	635400000	597900000	655260000	586140000	520600000	702880000	485310000	498160000	1078700000	1364700000	344750000	571380000	629960000	436460000	468210000	1007300000	496500000	433360000	680850000	407000000	346370000	711790000	366820000	324250000	495890000	824600000	748880000	415270000	477750000	514470000	1444000000	987920000	1570400000	419220000	3217300000	1395100000	225600000	674400000	755280000
SUCLG2	XP_003132357.4;XP_020926487.1	XP_003132357.4;XP_020926487.1	XP_003132357.4 succinate--CoA ligase subunit beta, mitochondrial isoform X1 GN=SUCLG2 [Sus scrofa];XP_020926487.1 succinate--CoA ligase subunit beta, mitochondrial isoform X2 GN=SUCLG2 [Sus scrofa]	21	22	16108000000	687050000	681090000	798220000	588310000	658250000	858290000	790660000	615550000	295790000	533040000	287290000	611680000	238190000	648030000	919010000	526770000	659360000	874390000	768810000	367770000	738570000	550500000	586400000	678910000	437600000	708350000	832030000	794640000	825780000	765270000	794450000	756100000	770150000	847620000	961850000	894970000	1001700000	805140000	854230000	787490000	841580000	760070000	870520000
GPD1L	XP_003483187.1	XP_003483187.1	XP_003483187.1 glycerol-3-phosphate dehydrogenase 1-like protein GN=GPD1L [Sus scrofa]	23	23	16089000000	966370000	652520000	722660000	774210000	497040000	1085200000	904790000	676060000	308400000	565480000	265150000	570960000	253330000	533500000	899490000	417470000	683870000	853230000	629050000	326770000	703740000	590950000	644810000	691750000	381470000	491230000	924320000	793080000	771950000	911340000	644590000	910840000	842760000	923410000	905970000	847760000	988700000	766240000	849830000	722970000	734840000	633520000	917210000
PSMA6	NP_001132944.1	NP_001132944.1	NP_001132944.1 proteasome subunit alpha type-6 GN=PSMA6 [Sus scrofa]	11	11	16047000000	823080000	662720000	766150000	615720000	589070000	831560000	737770000	609410000	309350000	617960000	291360000	683270000	298350000	549640000	959730000	530010000	526350000	634710000	752220000	396210000	745920000	820160000	582920000	503370000	506240000	703960000	1014700000	821800000	911280000	811940000	748630000	825480000	823120000	841210000	989200000	995600000	889850000	846430000	877160000	683330000	926600000	775980000	773990000
ATP2A2	XP_020927734.1;NP_999030.1	XP_020927734.1;NP_999030.1	XP_020927734.1 sarcoplasmic/endoplasmic reticulum calcium ATPase 2 isoform X1 GN=ATP2A2 [Sus scrofa];NP_999030.1 sarcoplasmic/endoplasmic reticulum calcium ATPase 2 GN=ATP2A2 [Sus scrofa]	27	37	16039000000	559110000	674610000	769850000	520250000	975490000	862750000	996440000	528580000	241960000	429820000	275900000	926290000	220060000	541180000	872410000	512370000	535720000	766250000	525240000	319480000	1052800000	531590000	863380000	246420000	357040000	934420000	671530000	844420000	763730000	675930000	1064700000	735040000	860850000	667920000	659810000	663190000	869530000	1099200000	748980000	851200000	826960000	681690000	864960000
DYSF	XP_013851496.2	XP_013851496.2	XP_013851496.2 LOW QUALITY PROTEIN: dysferlin GN=DYSF [Sus scrofa]	81	82	15997000000	588240000	644460000	682890000	459350000	648410000	813820000	992490000	455310000	297780000	614950000	353720000	707850000	223510000	456850000	938960000	502580000	620150000	922800000	586050000	292880000	906650000	779410000	1085800000	337630000	363510000	721420000	638940000	736950000	823050000	633460000	841400000	682020000	914370000	713080000	926320000	929760000	1201300000	881780000	844190000	670720000	784450000	796150000	823830000
CAVIN3	XP_003357187.1	XP_003357187.1	XP_003357187.1 protein kinase C delta-binding protein GN=CAVIN3 [Sus scrofa]	13	13	15987000000	901510000	565240000	884850000	755600000	864920000	1111600000	686970000	613550000	264200000	403600000	242880000	508790000	275460000	534900000	832790000	449170000	532060000	676640000	918800000	272050000	701010000	483540000	792320000	670140000	529390000	514900000	899050000	575470000	865870000	887950000	909100000	931400000	566580000	693330000	638960000	567840000	627230000	548720000	676780000	622070000	754620000	708530000	647160000
ARPC5	NP_001127829.1	NP_001127829.1	NP_001127829.1 actin-related protein 2/3 complex subunit 5 GN=ARPC5 [Sus scrofa]	8	8	15917000000	798430000	697470000	747830000	668140000	642190000	828340000	806350000	634730000	326770000	734600000	338790000	680580000	325610000	474510000	766230000	486000000	520520000	658610000	729560000	208380000	796010000	751180000	570910000	516680000	572810000	636070000	958480000	879120000	816240000	829220000	801360000	845390000	966270000	837080000	972960000	1072100000	1119100000	911180000	971320000	678900000	718740000	706220000	860110000
SLC9A3R2	NP_001131111.1;XP_020941254.1;XP_020941253.1	NP_001131111.1;XP_020941254.1	NP_001131111.1 Na(+)/H(+) exchange regulatory cofactor NHE-RF2 GN=SLC9A3R2 [Sus scrofa];XP_020941254.1 Na(+)/H(+) exchange regulatory cofactor NHE-RF2 isoform X2 GN=SLC9A3R2 [Sus scrofa]	17	17	15832000000	623680000	671800000	617810000	587660000	518410000	992380000	971720000	597880000	273600000	600450000	291020000	628320000	203670000	427970000	962790000	462300000	640680000	587410000	441710000	209260000	1195400000	906350000	446580000	604030000	303560000	1066100000	757870000	819270000	679440000	748650000	638230000	860790000	849470000	664710000	770650000	703180000	970910000	742230000	663510000	610290000	785220000	609010000	822410000
PSMA5	NP_001138373.1;XP_020944406.1;XP_020944407.1	NP_001138373.1;XP_020944406.1;XP_020944407.1	NP_001138373.1 proteasome subunit alpha type-5 GN=PSMA5 [Sus scrofa];XP_020944406.1 proteasome subunit alpha type-5 isoform X1 GN=PSMA5 [Sus scrofa];XP_020944407.1 proteasome subunit alpha type-5 isoform X2 GN=PSMA5 [Sus scrofa]	12	12	15794000000	896960000	666470000	828650000	647770000	561970000	891550000	920680000	635930000	235470000	502080000	217250000	627850000	236860000	578200000	941740000	525220000	594170000	708340000	838810000	357750000	630040000	594360000	557030000	442020000	425640000	730770000	979540000	793130000	919460000	760590000	771050000	840570000	936500000	865880000	694040000	807650000	760910000	797710000	753080000	774430000	811570000	763450000	870590000
EHD1	XP_020938530.1	XP_020938530.1	XP_020938530.1 EH domain-containing protein 1 GN=EHD1 [Sus scrofa]	23	23	15771000000	754500000	663680000	741630000	587040000	682430000	874000000	795550000	599130000	232650000	549410000	204480000	758600000	217330000	636810000	841210000	582870000	518810000	751850000	874590000	236920000	725640000	604950000	655700000	588330000	496900000	595980000	830920000	830520000	823690000	746270000	771370000	881430000	855420000	772920000	719760000	741400000	781300000	850100000	781820000	799420000	785170000	853830000	771320000
LCN2	NP_001231339.1	NP_001231339.1	NP_001231339.1 neutrophil gelatinase-associated lipocalin precursor GN=LCN2 [Sus scrofa]	2	14	15732000000	1313100000	822560000	362520000	522330000	552010000	178060000	241200000	1221800000	389170000	818290000	205850000	631160000	297860000	610770000	159360000	445530000	1938600000	608750000	628440000	93350000	408070000	1128200000	487760000	563090000	566570000	537970000	1422600000	1155500000	502840000	628000000	751140000	267990000	348520000	1511500000	1149800000	1164300000	791710000	821840000	912530000	819030000	199340000	709580000	2763200000
MYO1D	XP_020923106.1;XP_020923108.1;XP_020923104.1;XP_020923105.1	XP_020923106.1;XP_020923108.1;XP_020923104.1;XP_020923105.1	XP_020923106.1 unconventional myosin-Id isoform X3 GN=MYO1D [Sus scrofa];XP_020923108.1 unconventional myosin-Id isoform X4 GN=MYO1D [Sus scrofa];XP_020923104.1 unconventional myosin-Id isoform X1 GN=MYO1D [Sus scrofa];XP_020923105.1 unconventional myosin-	51	53	15718000000	548090000	686480000	818620000	740310000	601170000	988580000	804890000	501370000	269900000	509990000	349620000	653140000	238790000	342220000	1185200000	480480000	407420000	847730000	482050000	421340000	967990000	515780000	692850000	590350000	279690000	793550000	638900000	774410000	829290000	833200000	673160000	785120000	758920000	776710000	883880000	834180000	1210700000	796950000	916540000	607160000	869980000	699520000	699610000
ADIRF	NP_001230432.1	NP_001230432.1	NP_001230432.1 adipogenesis regulatory factor GN=ADIRF [Sus scrofa]	3	3	15703000000	1274300000	499720000	321430000	914160000	688690000	1500700000	1353900000	988570000	332430000	123740000	355060000	677170000	330360000	854070000	1140000000	645200000	151500000	176710000	225480000	218050000	1159200000	1007700000	153820000	120900000	94579000	395940000	1389100000	680610000	336930000	1148100000	872700000	1416100000	1270500000	1426800000	1047400000	195980000	1241900000	779210000	1066100000	1133200000	1061100000	1060200000	204050000
SORBS1	XP_020929802.1;XP_020929828.1;XP_020929822.1	XP_020929802.1;XP_020929828.1;XP_020929822.1	XP_020929802.1 sorbin and SH3 domain-containing protein 1 isoform X16 GN=SORBS1 [Sus scrofa];XP_020929828.1 sorbin and SH3 domain-containing protein 1 isoform X41 GN=SORBS1 [Sus scrofa];XP_020929822.1 sorbin and SH3 domain-containing protein 1 isoform X35	0	43	15679000000	865400000	694210000	739850000	565480000	1022300000	1033000000	793420000	627560000	306700000	359280000	164450000	518370000	169140000	405100000	1008600000	647540000	402750000	681370000	816190000	245040000	735950000	597410000	915660000	666130000	223040000	474990000	847750000	701140000	736060000	707940000	1088500000	798370000	632360000	838030000	977180000	582550000	699130000	689530000	652880000	706930000	812550000	826110000	710400000
TMEM43	XP_020925039.1	XP_020925039.1	XP_020925039.1 transmembrane protein 43 GN=TMEM43 [Sus scrofa]	17	17	15596000000	470740000	790350000	699330000	486790000	691150000	1057800000	1019700000	389420000	172490000	338350000	240830000	772110000	221640000	601970000	1126700000	444640000	564610000	901600000	581230000	336680000	845820000	615890000	745160000	335910000	413040000	732200000	492940000	865060000	721770000	580420000	922560000	880100000	952940000	600120000	654340000	559560000	820720000	935270000	729850000	881880000	988250000	695250000	822430000
SLC25A3	NP_001157984.1	NP_001157984.1	NP_001157984.1 phosphate carrier protein, mitochondrial GN=SLC25A3 [Sus scrofa]	12	12	15591000000	448900000	689210000	601860000	551880000	662810000	796410000	800840000	450040000	213460000	447450000	330320000	866980000	251330000	542670000	1050500000	395520000	553730000	808390000	602740000	295890000	863370000	678240000	898000000	425360000	564500000	800550000	565960000	979190000	578350000	655250000	753610000	781430000	931830000	719690000	705020000	743020000	1004200000	995570000	741610000	745300000	860300000	476630000	800090000
ADH5	NP_001231762.1	NP_001231762.1	NP_001231762.1 alcohol dehydrogenase class-3 GN=ADH5 [Sus scrofa]	15	17	15532000000	685980000	523930000	826510000	688640000	593210000	1108100000	985180000	701270000	327350000	652810000	260560000	520780000	216570000	642810000	742980000	400230000	453980000	736420000	750310000	232120000	630610000	692870000	632860000	706930000	297090000	522180000	811930000	797080000	939130000	808770000	697570000	947540000	896880000	927090000	934010000	865570000	908260000	676140000	749310000	823450000	754970000	641670000	755680000
EHD4	XP_020953010.1	XP_020953010.1	XP_020953010.1 EH domain-containing protein 4 GN=EHD4 [Sus scrofa]	26	26	15501000000	564520000	606310000	894150000	677220000	740360000	1019500000	652720000	546270000	279340000	485790000	258770000	538620000	407200000	391220000	810820000	616280000	440800000	747720000	731330000	353240000	668720000	550270000	877690000	590830000	415010000	636670000	666660000	825280000	946500000	819650000	859020000	892130000	745710000	758990000	794490000	718020000	860180000	661190000	821730000	681660000	871740000	970520000	748050000
SNRNP200	XP_020942757.1;XP_020942758.1	XP_020942757.1;XP_020942758.1	XP_020942757.1 U5 small nuclear ribonucleoprotein 200 kDa helicase isoform X1 GN=SNRNP200 [Sus scrofa];XP_020942758.1 U5 small nuclear ribonucleoprotein 200 kDa helicase isoform X2 GN=SNRNP200 [Sus scrofa]	77	77	15466000000	736680000	677030000	856980000	710930000	558580000	977070000	869280000	622550000	207620000	444200000	174240000	629380000	166670000	435340000	1135000000	494350000	548050000	838570000	895010000	329850000	719440000	560500000	529990000	457270000	416690000	474370000	793270000	768230000	773260000	778510000	701530000	806620000	769800000	811280000	879170000	797290000	847950000	765650000	783140000	771160000	815850000	719600000	807150000
ACTR1A	XP_001928912.1	XP_001928912.1	XP_001928912.1 alpha-centractin GN=ACTR1A [Sus scrofa]	10	20	15436000000	657720000	545290000	709060000	571980000	633280000	824540000	659730000	648790000	302460000	585320000	279340000	571320000	305870000	591370000	1026300000	440460000	325150000	611540000	627780000	380890000	861570000	762940000	655930000	586090000	500180000	771130000	716350000	714260000	708970000	749700000	689980000	819030000	744680000	883230000	750640000	772200000	791350000	712230000	815730000	833090000	893040000	818940000	695190000
PTMA	NP_001153558.1;XP_020930232.1	NP_001153558.1	NP_001153558.1 prothymosin alpha GN=PTMA [Sus scrofa]	3	3	15405000000	550940000	670550000	775190000	510150000	517070000	430360000	527960000	696480000	776240000	695340000	630430000	543020000	320180000	168890000	92126000	399350000	659930000	518100000	572930000	339690000	786920000	829430000	675980000	921450000	1031800000	764110000	562610000	412740000	361330000	246200000	0	478480000	337700000	775050000	2460300000	1292500000	3197600000	715030000	689420000	0	45881000	263550000	928580000
TUFM	XP_003124563.3	XP_003124563.3	XP_003124563.3 elongation factor Tu, mitochondrial GN=TUFM [Sus scrofa]	25	25	15403000000	673250000	704050000	860730000	683380000	583970000	778560000	862330000	535810000	247360000	485910000	237600000	639920000	195170000	508530000	1054200000	489390000	566320000	596190000	718420000	398750000	633440000	603840000	656440000	467250000	497720000	724330000	773670000	760420000	790280000	726210000	683880000	692460000	725200000	722970000	830740000	753200000	866530000	764750000	707740000	712010000	796460000	678250000	785840000
GSTO1	NP_999215.1	NP_999215.1	NP_999215.1 glutathione S-transferase omega-1 GN=GSTO1 [Sus scrofa]	18	18	15397000000	591480000	521110000	666420000	600180000	642510000	837980000	697260000	507780000	258960000	536930000	358120000	809320000	346640000	707730000	894370000	389070000	631560000	552640000	519260000	373750000	708310000	916190000	502140000	583270000	468380000	775890000	724920000	636280000	738570000	798230000	835450000	825930000	792300000	687420000	822220000	860840000	1132000000	1006800000	1000500000	928540000	828110000	626570000	853410000
LIMCH1	XP_020956816.1	XP_020956816.1	XP_020956816.1 LOW QUALITY PROTEIN: LIM and calponin homology domains-containing protein 1 GN=LIMCH1 [Sus scrofa]	44	44	15372000000	773230000	590840000	812310000	639340000	523610000	853910000	685010000	582060000	313220000	498710000	289750000	548590000	206040000	303190000	1426600000	478530000	431030000	725060000	696940000	274730000	804060000	722700000	615770000	533650000	333010000	710230000	760670000	749690000	869540000	800750000	710680000	789200000	714740000	805280000	887580000	761800000	1034500000	755180000	777980000	613290000	983830000	690610000	656140000
ETFA	NP_001231332.1;XP_020953940.1	NP_001231332.1;XP_020953940.1	NP_001231332.1 electron transfer flavoprotein subunit alpha, mitochondrial GN=ETFA [Sus scrofa];XP_020953940.1 electron transfer flavoprotein subunit alpha, mitochondrial isoform X1 GN=ETFA [Sus scrofa]	15	15	15302000000	667280000	737660000	739330000	587650000	664190000	829570000	751630000	605730000	262220000	515450000	179260000	678280000	248610000	593660000	1019600000	477810000	499300000	679240000	635790000	292820000	831550000	605920000	654550000	509230000	381530000	654040000	777960000	927210000	917960000	763010000	855780000	801350000	765200000	829930000	805830000	758410000	658730000	856430000	721840000	798510000	874150000	745970000	775220000
NEXN	XP_020952103.1;XP_005665433.3;XP_020952102.1;XP_020952099.1;XP_020952098.1	XP_020952103.1;XP_005665433.3;XP_020952102.1;XP_020952099.1;XP_020952098.1	XP_020952103.1 nexilin isoform X5 GN=NEXN [Sus scrofa];XP_005665433.3 nexilin isoform X2 GN=NEXN [Sus scrofa];XP_020952102.1 nexilin isoform X4 GN=NEXN [Sus scrofa];XP_020952099.1 nexilin isoform X1 GN=NEXN [Sus scrofa];XP_020952098.1 nexilin isoform X1 GN	3	31	15289000000	847360000	516830000	728610000	659190000	397080000	1013000000	900600000	580130000	249140000	460150000	208150000	493900000	168880000	429160000	1284600000	624610000	521730000	685810000	538080000	342010000	876160000	569700000	637770000	536280000	461060000	559350000	803740000	601810000	726030000	708160000	561770000	710160000	725390000	814720000	832010000	818780000	781420000	594390000	608160000	679820000	915880000	800600000	681410000
XPO1	XP_020943143.1;XP_020943144.1;XP_020943147.1;XP_020943146.1;XP_020943145.1;XP_013851564.2	XP_020943143.1;XP_020943144.1;XP_020943147.1;XP_020943146.1;XP_020943145.1;XP_013851564.2	XP_020943143.1 exportin-1 isoform X1 GN=XPO1 [Sus scrofa];XP_020943144.1 exportin-1 isoform X2 GN=XPO1 [Sus scrofa];XP_020943147.1 exportin-1 isoform X3 GN=XPO1 [Sus scrofa];XP_020943146.1 exportin-1 isoform X3 GN=XPO1 [Sus scrofa];XP_020943145.1 exportin-	45	45	15260000000	618880000	621420000	790210000	603880000	542010000	995500000	755880000	621710000	278870000	561330000	264350000	556080000	248620000	612980000	870940000	451390000	512120000	684250000	714130000	329320000	812120000	620280000	621630000	541670000	527930000	502570000	770820000	831000000	839140000	734370000	695710000	791580000	812000000	820900000	891180000	844450000	868100000	761110000	738930000	816900000	774970000	770670000	833030000
PSMA7	NP_001230581.1;XP_020951855.1;XP_020951854.1;XP_020951857.1	NP_001230581.1	NP_001230581.1 proteasome subunit alpha type-7 GN=PSMA7 [Sus scrofa]	14	14	15256000000	899820000	605480000	741780000	667450000	659550000	766510000	672010000	622640000	343480000	537360000	290540000	618910000	367310000	396490000	1023600000	414600000	502410000	597610000	600050000	359450000	699390000	635150000	503700000	540190000	527780000	663070000	912190000	865240000	901600000	886310000	729360000	809660000	731670000	798360000	972770000	955240000	984840000	750300000	944710000	700270000	870030000	704660000	705840000
GLRX	XP_005655046.1;NP_999398.1	XP_005655046.1;NP_999398.1	XP_005655046.1 glutaredoxin-1 isoform X1 GN=GLRX [Sus scrofa];NP_999398.1 glutaredoxin-1 GN=GLRX [Sus scrofa]	6	6	15254000000	1226200000	452150000	908440000	736370000	460580000	635940000	1242000000	697970000	334810000	808210000	309220000	433490000	203740000	592980000	865600000	327980000	319890000	410460000	885030000	141620000	872620000	631810000	365330000	363560000	570010000	458140000	1327900000	541110000	885540000	870490000	553680000	583920000	1184300000	1108200000	976880000	1256200000	1066900000	532980000	733150000	920960000	787040000	486780000	540880000
RPS7	XP_005662840.1	XP_005662840.1	XP_005662840.1 40S ribosomal protein S7 GN=RPS7 [Sus scrofa]	9	9	15246000000	568550000	662790000	757220000	520790000	681090000	693260000	670260000	658570000	306410000	623560000	293100000	532720000	197670000	332720000	872190000	650760000	527290000	773270000	721670000	408260000	774650000	666230000	626240000	505410000	641730000	579180000	661450000	813820000	929100000	695350000	671550000	722530000	717890000	844560000	707410000	775610000	694740000	726770000	629650000	600870000	936560000	967610000	790880000
EEF1B2	NP_001230453.1	NP_001230453.1	NP_001230453.1 elongation factor 1-beta GN=EEF1B2 [Sus scrofa]	9	9	15146000000	739330000	601740000	607480000	607140000	552610000	785570000	757700000	663400000	323190000	568660000	210660000	570330000	235420000	590030000	1104100000	465600000	475410000	653950000	779580000	317120000	758640000	692470000	545700000	431470000	489080000	619900000	771710000	704350000	761190000	719540000	677960000	769630000	758180000	975690000	859840000	900210000	715150000	776130000	642810000	866870000	954250000	852690000	702080000
SRI	NP_001231072.1;NP_001231071.1	NP_001231072.1;NP_001231071.1	NP_001231072.1 sorcin isoform 2 GN=SRI [Sus scrofa];NP_001231071.1 sorcin isoform 1 GN=SRI [Sus scrofa]	13	13	15133000000	974400000	560870000	754140000	768820000	641100000	726680000	750990000	596190000	227700000	661270000	197650000	649210000	270370000	608020000	730040000	432770000	726840000	658890000	791010000	205100000	682910000	507370000	568700000	478580000	389310000	574000000	1047500000	769250000	892560000	879460000	746370000	801590000	892000000	696280000	811520000	948990000	1054000000	709400000	859610000	727080000	750340000	664250000	1071200000
COPB1	NP_001165837.1	NP_001165837.1	NP_001165837.1 coatomer subunit beta GN=COPB1 [Sus scrofa]	40	40	15123000000	779020000	616690000	825490000	612770000	445440000	787730000	758340000	714370000	341310000	533190000	239740000	456230000	190730000	400270000	1024200000	601540000	370150000	671320000	728240000	398860000	768050000	763510000	608990000	368640000	471300000	646610000	799810000	752190000	792360000	725010000	680360000	758060000	729480000	946460000	942120000	839440000	752760000	693470000	830740000	737390000	893900000	793140000	622760000
UQCRC1	XP_001926664.3;XP_005669579.1;XP_020926297.1;XP_020926296.1	XP_001926664.3;XP_005669579.1;XP_020926297.1;XP_020926296.1	XP_001926664.3 cytochrome b-c1 complex subunit 1, mitochondrial isoform X4 GN=UQCRC1 [Sus scrofa];XP_005669579.1 cytochrome b-c1 complex subunit 1, mitochondrial isoform X3 GN=UQCRC1 [Sus scrofa];XP_020926297.1 cytochrome b-c1 complex subunit 1, mitochondr	19	19	15099000000	720000000	638100000	667580000	483080000	629690000	865760000	793530000	537200000	216940000	556900000	254230000	551830000	188080000	512220000	1172600000	461060000	563500000	762290000	712860000	270030000	703860000	646800000	542700000	461840000	446430000	740180000	794120000	807780000	758990000	675500000	726990000	747390000	762840000	830140000	824200000	768890000	794170000	761510000	698780000	750310000	887700000	709310000	869080000
GNB2	XP_020941908.1;XP_003481037.1	XP_020941908.1;XP_003481037.1	XP_020941908.1 guanine nucleotide-binding protein G(I)/G(S)/G(T) subunit beta-2 GN=GNB2 [Sus scrofa];XP_003481037.1 guanine nucleotide-binding protein G(I)/G(S)/G(T) subunit beta-2 GN=GNB2 [Sus scrofa]	7	9	15094000000	738070000	612320000	799010000	763970000	554570000	898140000	843620000	558670000	301890000	621880000	229260000	560390000	232310000	540560000	851050000	441050000	551670000	687880000	603530000	148300000	667030000	721690000	590700000	580660000	402940000	592420000	907630000	853220000	523670000	763660000	731610000	873510000	956270000	818250000	813940000	1020400000	623690000	765630000	668970000	738750000	776910000	727460000	907750000
FKBP4	NP_001182266.1	NP_001182266.1	NP_001182266.1 peptidyl-prolyl cis-trans isomerase FKBP4 GN=FKBP4 [Sus scrofa]	26	26	15088000000	873430000	757710000	698420000	590570000	412300000	848410000	738990000	685540000	340430000	439890000	211630000	478270000	171390000	415720000	884250000	534340000	609640000	654600000	814660000	300610000	535980000	719610000	631410000	651370000	533770000	555020000	901810000	901870000	782390000	710390000	652020000	801880000	733700000	856030000	906760000	683020000	754660000	720450000	681270000	698410000	777040000	799600000	853330000
C5	NP_001001646.1	NP_001001646.1	NP_001001646.1 complement C5a anaphylatoxin precursor GN=C5 [Sus scrofa]	3	62	15047000000	713430000	922610000	420020000	985750000	797250000	333390000	212680000	699210000	336940000	589130000	153620000	857710000	432590000	963900000	335640000	596600000	938340000	599680000	355200000	365440000	639400000	638090000	758460000	435970000	313470000	652730000	766760000	986510000	587800000	1014200000	839190000	433230000	434840000	947770000	953910000	869700000	726120000	894650000	1374100000	1324200000	424510000	947220000	1218700000
INHCA	XP_020924179.1	XP_020924179.1	XP_020924179.1 inhibitor of carbonic anhydrase isoform X1 GN=TF [Sus scrofa]	0	35	15032000000	555700000	340680000	292760000	1564100000	566420000	800360000	556570000	699320000	226030000	479950000	212980000	568840000	535320000	1556100000	831960000	357090000	618520000	792560000	345840000	481920000	557810000	408810000	516960000	260810000	171350000	732990000	710410000	473200000	508080000	1278300000	772120000	508570000	636260000	907180000	789760000	726070000	838100000	724880000	1553800000	1724000000	553700000	662320000	825810000
ABHD14B	XP_020924534.1;XP_005669680.1;XP_005669679.1;XP_003358507.1	XP_020924534.1;XP_005669680.1;XP_005669679.1;XP_003358507.1	XP_020924534.1 protein ABHD14B GN=ABHD14B [Sus scrofa];XP_005669680.1 protein ABHD14B GN=ABHD14B [Sus scrofa];XP_005669679.1 protein ABHD14B GN=ABHD14B [Sus scrofa];XP_003358507.1 protein ABHD14B GN=ABHD14B [Sus scrofa]	8	8	15028000000	833820000	674740000	730010000	585510000	565600000	1167400000	749490000	564780000	269200000	443690000	297060000	670680000	304730000	477870000	649180000	536060000	438830000	636740000	708340000	162760000	660020000	739450000	606320000	802910000	327910000	425210000	804510000	786270000	665300000	694580000	739100000	1070500000	736520000	765090000	848530000	695610000	909610000	823580000	952330000	627200000	559430000	742940000	699230000
DSTN	NP_001004031.1;XP_020932974.1	NP_001004031.1;XP_020932974.1	NP_001004031.1 destrin GN=DSTN [Sus scrofa];XP_020932974.1 destrin isoform X1 GN=DSTN [Sus scrofa]	12	12	15024000000	774410000	564700000	725730000	730580000	917140000	717940000	666640000	789820000	142760000	361510000	176940000	656290000	145000000	588420000	1193600000	393440000	523550000	769370000	640530000	250990000	849510000	621560000	656640000	375760000	247490000	543350000	778230000	678320000	669500000	818330000	1058400000	1044700000	796900000	919320000	486910000	632660000	487330000	776460000	659480000	729090000	936550000	523610000	683220000
COL18A1	XP_020927196.1;XP_020927195.1;XP_020927190.1;XP_020927194.1;XP_020927189.1;XP_020927188.1;XP_020927197.1;XP_020927193.1;XP_020927192.1	XP_020927196.1;XP_020927195.1;XP_020927190.1;XP_020927194.1;XP_020927189.1;XP_020927188.1;XP_020927197.1;XP_020927193.1;XP_020927192.1	XP_020927196.1 collagen alpha-1(XVIII) chain isoform X8 GN=COL18A1 [Sus scrofa];XP_020927195.1 collagen alpha-1(XVIII) chain isoform X7 GN=COL18A1 [Sus scrofa];XP_020927190.1 collagen alpha-1(XVIII) chain isoform X3 GN=COL18A1 [Sus scrofa];XP_020927194.1 c	27	27	15006000000	734770000	458350000	1056100000	580510000	749570000	933730000	664460000	571390000	198880000	380420000	199040000	400640000	164800000	299470000	1412000000	491800000	380430000	923410000	1065100000	377200000	552510000	317990000	824610000	549020000	389770000	330200000	718920000	579870000	1219100000	658530000	869450000	751220000	657950000	749070000	612690000	582390000	708860000	578020000	565970000	550450000	1096200000	743180000	582220000
LOC100622780	XP_020937606.1	XP_020937606.1	XP_020937606.1 lamina-associated polypeptide 2 isoform X1 GN=LOC100622780 [Sus scrofa]	16	28	14874000000	456210000	664710000	691650000	538340000	677170000	837810000	893460000	453500000	230350000	462570000	243470000	655300000	243290000	581910000	870360000	421510000	771180000	900240000	586820000	212830000	696730000	604410000	659560000	444810000	468950000	607090000	582310000	833070000	725550000	671220000	815770000	773180000	826270000	716260000	774200000	739940000	943060000	840770000	786400000	789210000	762180000	712830000	979120000
RDX	NP_001009576.1	NP_001009576.1	NP_001009576.1 radixin GN=RDX [Sus scrofa]	17	17	14844000000	684900000	790140000	747150000	426180000	479850000	784540000	869250000	459200000	222350000	478930000	170660000	525670000	145810000	401700000	980310000	472490000	416720000	841890000	664750000	392480000	923520000	740120000	557540000	468590000	402540000	796260000	641890000	819420000	735780000	564590000	534390000	741480000	827460000	723230000	633790000	663980000	541790000	672530000	573280000	609150000	774630000	665470000	759600000
SERPINC1	NP_001123430.1	NP_001123430.1	NP_001123430.1 antithrombin-III precursor GN=SERPINC1 [Sus scrofa]	20	27	14830000000	472730000	427970000	659760000	1129700000	657050000	610060000	645500000	722920000	294950000	524120000	253150000	617320000	715770000	1768900000	452930000	417720000	385170000	540040000	634400000	503380000	466280000	286170000	483090000	322320000	410830000	428180000	608910000	562970000	719250000	1315300000	886880000	632480000	716330000	957930000	816240000	808510000	818680000	793750000	1891400000	2013400000	454960000	734240000	603950000
PSMA1	XP_003123013.1	XP_003123013.1	XP_003123013.1 proteasome subunit alpha type-1 GN=PSMA1 [Sus scrofa]	15	15	14796000000	672300000	637740000	755220000	653230000	527090000	729760000	811820000	617300000	267400000	495340000	287730000	593880000	251980000	472630000	985300000	487870000	431990000	611270000	628190000	343500000	675030000	619820000	526400000	560960000	459630000	692460000	739000000	778770000	821100000	751600000	663840000	771310000	825300000	825060000	736890000	765630000	885790000	717440000	800590000	727820000	871400000	686760000	718040000
TTR	NP_999377.1	NP_999377.1	NP_999377.1 transthyretin precursor GN=TTR [Sus scrofa]	10	10	14761000000	369250000	178740000	268800000	932000000	821920000	677920000	852630000	635460000	177320000	453310000	264660000	626900000	1172600000	2451700000	694970000	524830000	390060000	315950000	173570000	344150000	744990000	309040000	290300000	183910000	76521000	829100000	411710000	336710000	306530000	1002400000	855660000	681270000	827480000	824780000	520400000	685000000	863980000	708240000	2637700000	3058400000	640070000	676990000	478170000
[truncated: 4,551 more rows]
[truncated: 43 more columns]

## Sheet: Table 2
Results of MS-EmpiRe-based quantitative proteomics of PVB versus Cntrl animals from upper lobe. Proteins showing significant differences in abundance between PVB and Cntrl animals (Benjamini–Hochberg corrected p-value (FDR) ≤ 0.05 and fold-change ≥ 1.5) are marked with a '+'. Positive log2 fold changes means more abundant in the PVB group.
[truncated: 105 more rows]

[truncated: 3 more sheets: Table 3, Table 4, Table 5]
