# Supplementary material for: Proteomics and Metabolomics Based Analysis of Metabolic Changes in a Swine Model of Pulmonary Hypertension
Source: Preprints.org preprint supplement (doi:10.20944/preprints202301.0014.v1), 2023-01-03
Supplement: Supplementary file 3 [file supplementary data 2.xlsx]

## Sheet: Experiment info 
ID	General.All.file	General.All.label	General.All.lobe	General.All.treat	General.All.group	Stats.All.n.value	PCA.All.PC1..16.8..	PCA.All.PC2..14.1..	PCA.All.PC3..9.3..	PCA.All.PC4..7.2..	PCA.All.PC5..6.5..	PCA.All.PC6..5.8..
QC1	QC1	QC1	QC	QC	QC_QC	706	-1.45132	0.438359	-1.21661	0.195457	-0.172262	0.064034
QC2	QC2	QC2	QC	QC	QC_QC	650	-1.62635	0.827259	1.46975	-0.645629	-1.89277	-0.892656
X01	X01	X01	Upper	Control	Upper_Control	615	-0.84877	4.86301	-3.41958	1.56637	-0.639018	0.960528
X02	X02	X02	Upper	Control	Upper_Control	655	-1.93285	4.55845	-0.904412	-2.86017	0.516266	0.566733
X03	X03	X03	Upper	Control	Upper_Control	653	-3.42096	5.06806	-1.0414	1.23468	-0.12562	1.42123
X04	X04	X04	Upper	Control	Upper_Control	732	-4.56932	-2.97067	-3.04385	-3.09174	-0.159127	-0.539973
X05	X05	X05	Upper	Control	Upper_Control	590	3.55302	-0.736206	-5.591	-0.2964	-1.76872	1.63619
X06	X06	X06	Upper	Control	Upper_Control	705	-1.31955	-3.46343	-3.91893	-5.243	2.04353	-1.43932
X07	X07	X07	Upper	PVB	Upper_PVB	660	-2.24678	-1.70961	3.53232	1.93808	-3.84639	-0.428889
X08	X08	X08	Upper	PVB	Upper_PVB	716	-5.03251	0.395653	2.3594	-2.80765	-0.551079	-0.0925838
X09	X09	X09	Upper	PVB	Upper_PVB	606	1.38718	2.46492	2.32061	-1.45449	1.71307	2.13336
X10	X10	X10	Upper	PVB	Upper_PVB	571	1.76585	5.71147	1.15396	0.772393	1.47138	-1.92194
X11	X11	X11	Upper	PVB	Upper_PVB	670	-1.42396	-0.0137322	1.63882	0.617957	0.100959	0.470392
X12	X12	X12	Upper	PVB	Upper_PVB	608	-0.730018	2.31899	-1.10844	1.99143	-1.21482	-3.89221
X13	X13	X13	Lower	Control	Lower_Control	643	2.07173	-1.61065	0.240802	1.20494	-0.552147	4.33246
X14	X14	X14	Lower	Control	Lower_Control	444	9.9552	2.20539	1.03517	-2.27628	-1.56289	-4.28498
X15	X15	X15	Lower	Control	Lower_Control	674	-1.83367	0.253003	-2.57826	3.96052	1.04455	0.332789
X16	X16	X16	Lower	Control	Lower_Control	643	-1.47819	-2.24693	2.81676	-2.1567	-3.00173	0.360774
X17	X17	X17	Lower	Control	Lower_Control	577	5.6199	-1.59445	-1.8327	0.274366	-0.931464	2.57361
X18	X18	X18	Lower	Control	Lower_Control	600	2.82892	-6.34013	0.571161	0.703664	1.51598	0.295506
X19	X19	X19	Lower	PVB	Lower_PVB	687	-0.855748	0.443575	1.28618	-0.501746	-2.08053	1.28782
X20	X20	X20	Lower	PVB	Lower_PVB	686	-0.161146	-3.42941	-2.62406	3.71714	0.64659	-2.59894
X21	X21	X21	Lower	PVB	Lower_PVB	651	-1.82217	-0.373421	2.215	1.03821	5.50379	-0.244201
X22	X22	X22	Lower	PVB	Lower_PVB	564	3.97449	0.0121342	2.9174	-0.010929	0.521057	2.1668
X23	X23	X23	Lower	PVB	Lower_PVB	663	-2.02965	-4.32581	1.73547	2.23567	-1.00142	-1.88899
X24	X24	X24	Lower	PVB	Lower_PVB	613	1.62668	-0.745818	1.98645	-0.106148	4.42281	-0.377538

## Sheet: Table 1
				Feature Information
ID	General.All.ID	General.All.rtmed	General.All.mzmed	General.All.annot_ms1	General.All.annot_ms2	General.Extended.mzmin	General.Extended.mzmax	General.Extended.rtmin	General.Extended.rtmax	General.Extended.npeaks	General.Extended.peakidx	General.Extended.ms2spectrum	General.Extended.purity	PCA.All.PC1..16.8..	PCA.All.PC2..14.1..	PCA.All.PC3..9.3..	PCA.All.PC4..7.2..	PCA.All.PC5..6.5..	PCA.All.PC6..5.8..	Stats.Mean.Upper_Control	Stats.N.value.Upper_Control	Stats.Quantile.Upper_Control	Stats.Mean.Upper_PVB	Stats.N.value.Upper_PVB	Stats.Quantile.Upper_PVB	Stats.Mean.Lower_Control	Stats.N.value.Lower_Control	Stats.Quantile.Lower_Control	Stats.Mean.Lower_PVB	Stats.N.value.Lower_PVB	Stats.Quantile.Lower_PVB	Stats.Mean.Lower_control	Stats.N.value.Lower_control	Stats.Quantile.Lower_control	Stats.Mean.Control	Stats.N.value.Control	Stats.Quantile.Control	Stats.Mean.PVB	Stats.N.value.PVB	Stats.Quantile.PVB	Stats.Mean.Upper	Stats.N.value.Upper	Stats.Quantile.Upper	Stats.Mean.Lower	Stats.N.value.Lower	Stats.Quantile.Lower	ttest.Upper_Control_vs_Upper_PVB.pvalue	ttest.Upper_Control_vs_Upper_PVB.log.pvalue	ttest.Upper_Control_vs_Upper_PVB.fdr
FT431	FT431	437.294	513.121	NCGC00384750-01_C20H28O14_alpha-D-Glucopyranoside, beta-L-fr		513.12	513.122	436.303	437.999	13	1121;1850;2594;3369;4248;5120;5950;9981;10725;11443;13506;17999;18708	78.95913;96.96956;171.0061;513.1216|4662.55597278087;299.265487169031;34608.701467295;1711.81651604618	1	-0.0333866	0.025675	-0.0687149	-0.0597305	-0.0361622	0.0374981	5.25992	6	0.61794	4.51009	2	0.0908084	4.58	2	0.155039	4.4952	2	0.101883	#NUM!	0		4.91996	8	0.386489	4.50264	4	0.0952381	4.885	8	0.353267	4.5376	4	0.118494	0.00011891	3.92478	0.0686277
FT196	FT196	46.535	280.237			280.236	280.238	44.3122	47.9728	26	168;940;1678;2395;3168;3982;4954;5701;6682;7547;8393;9085;9786;10545;11251;11940;12528;13309;14035;14733;15444;16252;17085;17843;18496;19277		0	0.00212613	-0.00698638	0.0307921	0.0183505	0.00131468	-0.0260405	5.3169	6	0.645626	5.55478	6	0.782946	5.50127	6	0.784053	5.55029	6	0.769657	#NUM!	0		5.40908	12	0.72979	5.55254	12	0.778516	5.43584	12	0.728682	5.52578	12	0.776301	0.000189996	3.72125	0.0686277
FT194	FT194	46.3669	279.233	STD_Linoleic acid;Linoelaidic acid;Chaulmoogric Acid	+	279.232	279.234	44.3122	47.0609	26	166;938;1676;2393;3166;3980;4952;5699;6680;7545;8391;9083;9784;10544;11249;11938;12526;13307;14034;14731;15442;16250;17083;17841;18495;19275	59.01413;179.1075;217.1958;261.1859;261.222;278.3799;279.2335;280.0757;280.1751;281.2483|778.856557819044;532.904189299695;429.686888021163;684.796183944508;4625.87794527871;2821.1207391807;918306.518515734;838.976495126175;720.995702244355;526.489649498498	1	0.00161109	-0.00840883	0.0324167	0.0190496	0.0068245	-0.0252806	6.05535	6	0.929125	6.29757	6	0.964563	6.23299	6	0.96567	6.32607	6	0.968992	#NUM!	0		6.14417	12	0.946844	6.31182	12	0.9701	6.17646	12	0.946844	6.27953	12	0.968992	0.000233427	3.63185	0.0686277
FT208	FT208	46.1485	284.267			284.267	284.269	44.3122	47.0428	26	177;947;1686;2404;3178;3993;4960;5710;6695;7557;8398;9090;9795;10552;11261;11947;12535;13318;14042;14739;15455;16261;17091;17849;18507;19283		0	0.0124055	0.00852124	0.0257	-0.00106124	-0.00162963	-0.0323897	5.55438	6	0.771872	5.76252	6	0.868217	5.73043	6	0.866002	5.6513	6	0.821705	#NUM!	0		5.6424	12	0.831672	5.70691	12	0.840532	5.65845	12	0.826135	5.69087	12	0.843854	0.000388128	3.41102	0.0718634
FT206	FT206	45.4845	283.265	STD_Stearic acid ;Ethyl hexadecanoate;16-Methylheptadecanoic	+	283.264	283.266	44.0859	46.87	26	176;946;1684;2402;3176;3992;4959;5708;6693;7555;8397;9088;9794;10551;11260;11946;12533;13317;14041;14737;15454;16259;17089;17848;18505;19281	265.2537;282.399;283.1097;283.265|3105.26495118739;2956.47657709319;428.955562966462;899082.478008878	1	0.0195373	0.0124674	0.0185127	-0.00166113	-0.00106602	-0.0205279	6.3746	6	0.9701	6.52835	6	0.983389	6.53642	6	0.983389	6.43117	6	0.977852	#NUM!	0		6.45551	12	0.975637	6.47976	12	0.978959	6.45148	12	0.974529	6.4838	12	0.981174	0.000407389	3.38999	0.0718634
FT875	FT875	238.387	928.63			928.623	928.632	234.174	241.484	26	742;1463;2194;2948;3742;4725;5466;6421;7300;8197;8900;9592;10349;11050;11775;12320;13109;13865;14523;15236;16032;16860;17679;18304;19091;19766	135.0308;303.234;750.5452;778.577;928.5494;928.6329|12902.6557259999;304.917691854246;458.955550714745;2639.09362884095;824.518294178097;20461.4904926105	1	-0.00250718	-0.0232636	0.0365896	0.0154594	0.00322879	0.0035805	4.86865	6	0.337763	5.11565	6	0.547065	5.08902	6	0.550388	5.20017	6	0.600221	#NUM!	0		4.97883	12	0.445183	5.15791	12	0.573643	4.99215	12	0.440753	5.1446	12	0.58361	0.000618462	3.20869	0.090914
FT026	FT026	100.124	121.029	2-Hydroxybenzaldehyde;4-Hydroxybenzaldehyde;Benzoic acid	+	121.029	121.029	97.4141	114.703	25	23;806;1512;2251;3012;3811;4814;5544;6509;7375;8270;8944;9654;10399;11105;12379;13171;13907;14595;15288;16096;16939;17726;18348;19144	77.03935;79.95734;80.95717;92.02664;121.0289|553.810102466415;2289.97861338336;135.585172082418;287.904828044987;779.733442167724	1	-0.0133398	-0.00537727	0.0181623	0.0189125	-7.51493e-05	0.0197207	4.8865	6	0.361019	5.01844	6	0.470653	4.91024	5	0.419712	5.01195	6	0.475083	#NUM!	0		4.89837	11	0.372093	5.0152	12	0.48062	4.95247	12	0.413068	4.9611	11	0.437431	0.000767124	3.11513	0.0915459
FT061	FT061	457.6	154.975	Phosphoglycolic acid;Hydroxypropanedioic acid;1,3-Dithiane		154.974	154.975	456.614	459.368	26	55;835;1545;2279;3047;3846;4848;5575;6543;7412;8298;8975;9681;10429;11138;11848;12413;13197;13935;14625;15320;16132;16972;17753;18379;19175	59.01417;78.95886;96.96944|231.306817010145;1929.60400671375;158.890220146156	1	0.00321931	-0.00111453	0.0183429	0.000738303	0.00192698	-0.00344123	4.75225	6	0.254707	4.86469	6	0.328904	4.8455	6	0.354374	4.84444	6	0.3134	#NUM!	0		4.79887	12	0.301218	4.85457	12	0.315615	4.80847	12	0.289037	4.84497	12	0.330011	0.000843513	3.07391	0.0915459
FT607	FT607	241.513	720.498	PE(18:4(6Z,9Z,12Z,15Z)/P-18:1(11Z));PE(18:4(6Z,9Z,12Z,15Z)/P		720.497	720.499	237.751	244.558	16	521;1260;7076;7966;8708;9392;10132;11570;12149;13647;15023;15821;17441;18103;18865;19577	196.038;203.1802;257.2273;279.2329;301.2173;303.2331;329.2483;408.2509;416.2526;418.2731;434.2674;436.283;476.2777;720.4998;722.5138|414.802445631358;389.591677665231;4463.56546293612;773.005679741703;27405.0456728246;5410.45925279544;3353.33933434705;461.953741648074;259.349928124982;2494.47632923791;1042.94469718291;8234.98159306406;1262.47623171975;96147.4935180837;924.371742208092	1	-0.000840471	-0.0350717	0.136085	0.00742962	-0.00972864	0.0434062	4.69758	0	0.208195	5.31924	5	0.674419	5.20304	4	0.629014	5.3763	5	0.706534	#NUM!	0		4.95031	4	0.417497	5.34777	10	0.6866	5.00841	5	0.452935	5.28967	9	0.667774	0.000934142	3.02959	0.0915459
FT316	FT316	478.762	383.118	MMV019993;S-Adenosylhomocysteine;S-Adenosyl-homocysteine		383.118	383.12	477.353	479.372	8	1754;2488;3263;4101;5038;5825;8487;11346	59.01399;89.02428;119.0348;179.0564;383.1204|250.278166944125;181.233873117929;88.1739340868847;103.637126525524;575.073632742817	1	-0.0184141	0.0326346	-0.0493197	-0.0389397	0.00730535	0.0566162	4.83408	6	0.311185	4.32945	1	0.0232558	4.35157	1	0.0299003	4.25143	0	0.0155039	#NUM!	0		4.59283	7	0.147287	4.29044	1	0.0166113	4.58176	7	0.118494	4.3015	1	0.021041	0.00130547	2.88423	0.114259
FT741	FT741	68.0011	798.537	PE(22:4(7Z,10Z,13Z,16Z)/P-18:1(11Z));PE(22:4(7Z,10Z,13Z,16Z)		798.535	798.54	66.2496	69.9256	18	627;2093;2837;3636;4591;5359;6281;7184;8075;11665;13746;14399;15136;16734;17549;18190;18972;19661		0	-0.0133191	-0.035745	-0.0306331	-0.0168722	0.0385607	0.0279495	5.0539	6	0.470653	4.65721	2	0.191584	4.83876	4	0.345515	4.93552	5	0.40753	#NUM!	0		4.94633	10	0.41196	4.79636	7	0.287929	4.85555	8	0.335548	4.88714	9	0.383167	0.001425	2.84619	0.114259
FT417	FT417	478.454	503.16	STD_Raffinose;Maltotriose;maltotriose	+	503.153	503.162	476.73	479.372	21	354;1111;1840;2583;3357;4231;5111;5933;6890;7765;8570;9244;9973;10714;11434;12721;13497;14178;15648;17280;17994	59.01397;71.01397;73.02931;89.02437;97.02944;101.0241;113.0242;119.0348;143.0346;161.0451;179.0555;221.0663;263.0763;281.0879;341.1091;383.1191;425.1308;503.1668|1206.54787001639;1000.75682165215;2053.64061624064;2226.43514062138;1498.79359136805;5003.95871225516;884.100101643319;1267.34785968179;2080.93608250566;12928.2349746714;6199.80739620966;9904.23070284418;1381.8276237728;1276.14976533173;…	1	-0.0399059	0.0538358	-0.0588575	-0.0635747	-0.0230815	0.106069	5.43655	6	0.718715	4.92576	6	0.401993	4.93096	4	0.439646	4.60958	3	0.163898	#NUM!	0		5.18376	10	0.593577	4.76767	9	0.265781	5.18116	12	0.581395	4.77027	7	0.267996	0.00201768	2.69515	0.1483
FT491	FT491	477.899	563.181	Cascaroside C;Aloinoside B;3,4,5-trihydroxy-6-({7,8,15-trihy		563.174	563.184	476.73	479.372	17	412;1163;1896;2643;3421;4308;5158;6002;7834;8615;9292;11482;12776;13547;14217;15707;18027	73.02932;89.02427;97.029;101.024;113.0242;119.0346;143.0348;161.0452;179.0557;221.0664;224.0676;263.0769;281.0876;304.0593;306.0757;341.1084;383.1194;425.1286;443.1412;503.1626;563.1248|1130.44679486206;1618.98977362174;886.119210904202;3866.03712244919;631.563694231636;1153.45702615225;2502.79858764575;20460.1431311787;9752.36179291984;9485.85340457805;333.939547032008;2400.78562862064;3257.7672…	1	-0.0287375	0.0480386	-0.0700726	-0.075575	-0.0227671	0.116735	5.16478	6	0.55371	4.48384	3	0.0730897	4.67864	4	0.219269	4.31997	2	0.0287929	#NUM!	0		4.92171	10	0.389812	4.4019	5	0.0465116	4.82431	9	0.301218	4.49931	6	0.0930233	0.00233841	2.63108	0.158652
FT199	FT199	45.5338	281.249	STD_Oleic acid;Vaccenic acid;Elaidic acid	+	281.248	281.251	44.0859	46.9809	26	171;942;1680;2398;3171;3986;4956;5704;6686;7550;8394;9086;9789;10546;11254;11942;12529;13312;14037;14734;15448;16254;17086;17845;18500;19278	181.1229;263.2017;263.2368;280.3901;281.2491|1540.65142307267;1347.32622892389;623.74138385525;2892.84384167313;879113.414214117	1	0.00459435	-0.00647889	0.0170271	0.0135574	0.00738623	-0.000966343	6.38568	6	0.971207	6.52574	6	0.982281	6.53687	6	0.984496	6.5241	6	0.983389	#NUM!	0		6.46128	12	0.976744	6.52492	12	0.982281	6.45571	12	0.976744	6.53048	12	0.984496	0.00261265	2.58292	0.164597
FT168	FT168	48.1044	256.236			256.235	256.237	47.021	49.5809	26	142;918;1652;2370;3146;3956;4934;5674;6653;7518;8372;9060;9765;10516;11227;11918;12504;13283;14016;14708;15419;16223;17062;17826;18475;19254		0	0.000345815	-0.00511239	0.0296541	0.0086657	-0.00569438	-0.0239748	5.75604	6	0.856035	5.9683	6	0.914729	5.95125	6	0.918051	5.91609	6	0.900332	#NUM!	0		5.85364	12	0.891473	5.9422	12	0.910299	5.86217	12	0.885936	5.93367	12	0.909192	0.00303451	2.51791	0.168998
FT202	FT202	45.7533	282.252			282.252	282.253	44.3122	46.9809	26	174;945;1683;2400;3174;3988;4958;5706;6689;7552;8396;9087;9792;10549;11257;11944;12532;13315;14039;14736;15451;16256;17088;17847;18502;19280		0	0.00134964	-0.00952473	0.0225637	0.0102031	0.00441226	-0.0128853	5.56251	6	0.774086	5.72256	6	0.850498	5.72755	6	0.863787	5.7282	6	0.844961	#NUM!	0		5.64503	12	0.83278	5.72538	12	0.851606	5.64253	12	0.820598	5.72788	12	0.860465	0.00306572	2.51347	0.168998
FT233	FT233	45.1406	304.234	Capsiamide		304.233	304.235	43.8341	45.7195	26	198;966;1704;2428;3199;4021;4981;5737;6716;7582;8421;9113;9816;10572;11281;11962;12558;13340;14060;14760;15478;16286;17111;17869;18528;19304		0	-0.00178335	-0.0149458	0.0251812	0.0295719	0.0300702	0.0191847	5.4955	6	0.756368	5.71431	6	0.846069	5.67794	6	0.850498	5.7754	6	0.860465	#NUM!	0		5.58672	12	0.806202	5.74485	12	0.859358	5.60491	12	0.802879	5.72667	12	0.85825	0.00368131	2.434	0.190995
FT798	FT798	66.0826	847.546	PG(18:0/22:4(7Z,10Z,13Z,16Z))		847.543	847.548	64.4722	67.6695	17	680;2141;2888;3688;4654;5409;6350;7242;8135;11712;13046;13807;15179;15976;17610;19032;19704		0	-0.0374246	-0.0199064	-0.0329165	-0.0171011	0.0254577	0.0403704	4.87556	6	0.344408	4.45874	2	0.0631229	4.65557	4	0.199336	4.60313	4	0.161683	#NUM!	0		4.76556	10	0.267996	4.53094	6	0.10299	4.66715	8	0.187154	4.62935	8	0.179402	0.00535797	2.271	0.2555
FT609	FT609	122.482	721.501	[3-[[2,3-dihydroxypropoxy]-hydroxyphosphoryl]oxy-2-hexadecan	+	721.499	721.503	116.98	128.47	18	522;1261;1994;2750;3543;4452;5247;6143;10133;10859;11571;12886;14291;15024;16609;17443;18866;19578	152.996;171.0059;209.0228;227.0324;227.2014;253.2173;254.2206;254.4526;255.2331;256.2357;257.2385;281.2507;282.2515;283.2616;391.2259;465.2617;483.272;647.4653;719.2778;721.5041;722.5097|3116.57537242463;959.77854454532;192.301805977138;539.516796627456;956.347919724706;4420.03724265236;3815.15031835519;290.954952315639;90229.9781709471;1808.89088894878;730.910050932621;259.775009888426;383.28231…	1	-0.0292718	-0.0646717	-0.163816	0.075997	0.0741744	-0.00945879	5.95892	6	0.908084	5.18313	2	0.594684	5.67721	4	0.849391	5.58278	4	0.786268	#NUM!	0		5.81806	10	0.883721	5.38296	6	0.708749	5.57102	8	0.790698	5.63	8	0.830565	0.00550396	2.25932	0.2555
FT851	FT851	237.335	901.602	Triparinarin;TG(18:4(6Z,9Z,12Z,15Z)/18:4(6Z,9Z,12Z,15Z)/18:4		901.6	901.605	233.656	239.957	18	723;1448;6396;7286;8179;8881;10328;11035;11754;13090;14500;15215;16015;16839;17659;18285;19075;19745		0	-0.00740687	-0.0358708	0.040432	0.0435547	0.0238801	0.0198048	4.44667	1	0.0609081	4.77715	5	0.269103	4.73639	4	0.254707	4.98206	6	0.44629	#NUM!	0		4.59153	5	0.145072	4.8796	11	0.337763	4.61191	6	0.140642	4.85922	10	0.34773	0.00586261	2.23191	0.255668
FT071	FT071	100.512	165.019	Phthalic acid;Benzoquinoneacetic acid;Terephthalic acid		165.019	165.02	98.7418	114.703	26	64;844;1557;2289;3059;3857;4857;5586;6555;7425;8306;8984;9689;10437;11148;11857;12424;13207;13944;14634;15332;16142;16982;17761;18389;19186	77.03969;121.0289;165.0198|13412.8046551586;4459.67396248149;689.324135873055	1	0.00127987	-0.000858778	0.0151384	0.00779701	0.000352667	0.00796687	5.07338	6	0.48505	5.15678	6	0.570321	5.13067	6	0.58361	5.18549	6	0.590255	#NUM!	0		5.10202	12	0.533776	5.17114	12	0.589147	5.11508	12	0.529347	5.15808	12	0.589147	0.00608732	2.21557	0.255668
FT191	FT191	46.5647	277.216	STD_Linolenic acid;Pinolenic acid;Gamma-Linolenic acid	+	277.212	277.217	45.2955	47.0609	24	163;935;1673;2390;3163;4949;6677;7542;8388;9081;9781;10540;11246;11935;12523;13304;14031;14728;15439;16247;17081;17838;18492;19272	277.181;277.217|789.079242473628;19148.8288657784	1	0.0100667	0.0149158	0.0520779	0.0490448	-0.0107901	-0.0248915	4.87925	4	0.345515	5.26908	6	0.647841	5.18737	6	0.616833	5.22988	6	0.616833	#NUM!	0		5.03331	10	0.482835	5.24948	12	0.641196	5.07416	10	0.503876	5.20863	12	0.61794	0.00686694	2.16324	0.275302
FT167	FT167	47.0119	255.234	Ethyl tetradecanoate;Isopalmitic acid;Palmitic acid	+	255.233	255.235	45.6663	48.326	26	141;917;1651;2369;3145;3954;4933;5672;6652;7517;8371;9058;9764;10514;11226;11917;12502;13282;14015;14707;15418;16222;17060;17825;18473;19252	175.0246;237.2224;254.4539;255.2336|4708.77038107575;3987.72384190555;3755.46070249489;1120437.50288193	1	0.000968882	-0.00516613	0.0298425	0.00676619	-0.00553294	-0.0266705	6.57852	6	0.981174	6.77997	6	0.992248	6.77447	6	0.99557	6.74338	6	0.993355	#NUM!	0		6.6765	12	0.992248	6.76167	12	0.993355	6.67924	12	0.988926	6.75892	12	0.994463	0.00775992	2.11014	0.294336
FT605	FT605	121.579	719.487	PG(16:0/16:1(9Z));PG(16:1(9Z)/16:0);Lupeoside		719.486	719.489	115.732	127.09	21	519;1259;1992;2749;3541;4449;5244;6141;7074;7965;10131;10857;11569;12884;13646;14289;15021;16606;17440;18863;19576	152.9954;171.0059;227.0323;227.2012;253.2173;254.2203;255.2327;281.2484;389.2089;391.225;455.2403;463.2453;465.2615;481.2562;483.2726;717.2708;719.4888;720.4921|7863.46436507175;2041.38505709582;1233.15018886872;7814.58698838804;146210.760128993;464.980598986104;72803.1837693445;11655.0877054745;1787.8747839847;6911.20964073846;395.161364047499;2800.00900142718;5418.79973056271;2238.01230674436;8…	1	-0.0640424	-0.0725017	-0.173924	0.0577395	0.0368327	-0.0116349	6.28933	6	0.96124	5.44055	4	0.724252	5.92943	5	0.910299	5.69779	4	0.840532	#NUM!	0		6.10938	11	0.944629	5.56917	8	0.782946	5.86494	10	0.887043	5.81361	9	0.884828	0.00800914	2.09641	0.294336
FT825	FT825	66.1031	871.547	PGP(a-13:0/i-24:0);PGP(i-12:0/a-25:0);PGP(i-13:0/i-24:0)		871.532	871.55	64.9414	67.6219	19	700;1428;2157;2907;3708;4677;5426;6373;7263;8155;9536;10306;11732;13069;13828;14475;15995;16814;17636	152.9947;285.258;329.248;330.2516;331.2644;467.258;499.1537;539.2773;541.2901;797.6582;853.4398;871.4495;871.5502;871.6362;872.4444;872.4694;872.5556|68.7251917341257;78.2012163822969;2460.10164143868;221.831071988447;2539.76525609822;87.3475850097748;154.228049952678;172.036475985647;121.433768692577;511.182372100529;575.892515404649;5975.10031255443;29357.4478807347;113.914993905621;236.2235839…	1	-0.0373637	0.00248785	-0.0522546	-0.01146	0.0101961	0.0394952	5.06707	6	0.479513	4.72917	4	0.24031	4.81302	4	0.323367	4.76439	3	0.254707	#NUM!	0		4.94005	10	0.403101	4.74678	7	0.242525	4.89812	10	0.364341	4.78871	7	0.285714	0.00906191	2.04278	0.305524
FT171	FT171	46.988	257.238	Decanoylcholine		257.236	257.239	45.6663	48.227	24	145;921;1656;2374;3150;3960;5677;6656;7521;8375;9063;9767;10520;11231;11921;12507;13286;14710;15423;16228;17064;17829;18477;19256	175.0248;257.0844;257.239|961.523410084139;891.99136173699;10200.0180048258	1	-0.00810846	-0.00264592	0.0391294	0.00743617	0.00193974	-0.0365716	4.8082	5	0.293466	5.0302	6	0.48505	4.95999	5	0.461794	5.00344	6	0.466224	#NUM!	0		4.88409	10	0.363234	5.01682	12	0.483942	4.9192	11	0.384275	4.98172	11	0.461794	0.00909641	2.04113	0.305524
FT518	FT518	477.319	601.137	5'-Hydroxycastavinol;Cassiaside B;Mulberroside F		601.135	601.138	475.448	479.149	25	436;1187;1919;2667;3445;4343;5178;6033;6983;7869;8639;9315;10049;10787;11500;12118;12801;13573;14235;15735;16530;17358;18047;18782;19510	78.95896;96.96884;101.0242;143.0342;161.0452;179.0556;221.0665;259.0221;263.0775;281.088;341.1089;383.1191;425.1299;541.1161;601.1391|4625.9692309121;25467.7163436458;982.728080603793;696.889188050612;9393.93033003708;4866.61138833059;3752.32931287101;1970.66781670398;1316.17571069083;1944.21878687122;2673.24341216028;11706.7703052673;3175.30158614574;566.924632431511;93271.7405290063	1	-0.0243933	0.0742093	-0.0490039	-0.0747406	-0.0181262	0.106584	5.61629	6	0.803987	5.16175	6	0.578073	5.13868	5	0.590255	4.86487	6	0.331118	#NUM!	0		5.37748	11	0.707641	5.01331	12	0.478405	5.38902	12	0.710963	5.00177	11	0.478405	0.00935278	2.02906	0.305524
FT771	FT771	67.0764	823.548	PG(18:0/22:5(4Z,7Z,10Z,13Z,16Z));PG(18:0/22:5(7Z,10Z,13Z,16Z		823.546	823.551	64.9414	70.0533	26	652;1378;2119;2863;3666;4623;5388;6316;7216;8104;8819;9495;10255;10972;11688;12240;13020;13776;14426;15160;15953;16760;17578;18218;19004;19683	152.9957;279.2333;280.2357;281.2481;282.2521;283.2606;305.2483;329.2476;330.2521;331.2634;332.2664;333.2766;417.2404;467.2568;491.2785;541.2955;821.0158;823.5509|384.669576524135;519.439265317644;331.177997443751;8057.55242596489;430.89863699181;594.134239438003;201.501483385732;689.68343769277;449.780659423729;8330.11268908442;409.206069417735;472.58339960963;196.033228284534;283.878725122941;20…	1	-0.00596378	-0.0152821	-0.0280348	-0.00527833	0.0432119	0.038107	5.40511	6	0.704319	5.20228	6	0.612403	5.32074	6	0.694352	5.32713	6	0.675526	#NUM!	0		5.36293	12	0.699889	5.2647	12	0.653378	5.30369	12	0.6567	5.32394	12	0.69103	0.0102621	1.98877	0.310912
FT775	FT775	289.98	832.508	PS(18:0/20:4(8Z,11Z,14Z,17Z));PS(18:0/20:4(5Z,8Z,11Z,14Z));P		832.506	832.51	288.275	291.597	24	657;1385;2123;2866;3670;4629;5394;6324;7222;8111;8824;9499;10260;10976;11693;13025;13784;14431;15958;16763;17586;18225;19009;19686		0	-0.0241233	0.0111181	0.0184951	0.00471507	-0.00741908	0.0206428	5.26956	6	0.62237	5.43799	6	0.723145	5.13125	4	0.584718	5.34578	6	0.6866	#NUM!	0		5.20041	10	0.606866	5.39189	12	0.715393	5.35378	12	0.687708	5.23852	10	0.633444	0.0102887	1.98764	0.310912
FT637	FT637	494	742.069	BETA-NICOTINAMIDE ADENINE DINUCLEOTIDE PHOSPHATE;BETA-NICOTI	+	742.067	742.074	493.336	494.388	17	545;1284;2015;2771;3562;4484;5272;6174;7102;7992;10154;12912;13669;14315;15051;16634;17464	158.9249;174.9796;176.9354;254.9464;272.9568;290.9678;328.0444;352.9238;370.9339;408.0114;426.0221;466.9546;482.1016;484.9656;487.977;505.9881;522.043;540.0538;602.009;620.0214;742.0713|6837.44155283798;1932.26565597253;910.394963347514;2369.33297812416;18479.4590886128;4358.13662570861;2824.7232434968;2043.17891278319;1675.13729526971;53891.4083591839;7071.12694890509;1229.44277527963;1595.03305…	1	-0.060989	-0.00826571	-0.0684341	-0.0488067	-0.0239971	0.00537109	5.14074	6	0.531561	4.61859	3	0.159468	4.63036	4	0.183832	4.47949	2	0.0919158	#NUM!	0		4.88555	10	0.364341	4.54904	5	0.111849	4.87967	9	0.344408	4.55493	6	0.127353	0.0105752	1.97571	0.310912
FT215	FT215	401.555	291.007	Carboxyphosphamide;Carboxyifosfamide;2-Chloronorlichexanthon		291.006	291.008	400.554	403.327	26	182;951;1690;2410;3183;4001;4964;5716;6701;7564;8404;9094;9802;10557;11266;11949;12540;13325;14046;14744;15460;16267;17096;17853;18514;19288	59.01407;127.0006;141.0163|14265.2432585565;10667.4064648516;6091.87841512846	1	0.00914898	0.00772652	0.0126152	0.000640099	0.000826781	-0.00588704	5.35112	6	0.665559	5.45042	6	0.732004	5.44435	6	0.757475	5.40241	6	0.716501	#NUM!	0		5.39774	12	0.72093	5.42641	12	0.730897	5.40077	12	0.714286	5.42338	12	0.733112	0.0109843	1.95923	0.312522
FT143	FT143	298.865	237.093	Cinnamyl benzoate;4'-Methoxychalcone;Benzyl cinnamate		237.091	237.097	296.887	300.363	17	123;900;1629;2351;3125;3932;4914;5653;6629;7498;10495;11211;12486;13265;13999;15399;16203	79.95724;80.96512;106.9808;124.0068;180.0204;237.0911|4508.82716959359;618.748751415638;654.790689967855;1897.74187229748;610.31545698517;16026.5212546165	0.961538	-0.0373325	0.0125993	-0.0880974	-0.0135927	-0.0546029	0.0193189	5.1464	6	0.541528	4.71348	3	0.228128	4.77317	4	0.286822	4.61552	2	0.168328	#NUM!	0		4.95979	10	0.423034	4.6645	5	0.184939	4.92994	9	0.394241	4.69435	6	0.221484	0.012719	1.89555	0.350567
FT078	FT078	447.35	168.99	STD_Dihydroacetonephosphat;STD_Malic acid ;STD_L-malic acid	+	168.988	168.991	440.107	449.075	24	69;848;1562;2294;3862;4862;5591;6561;7430;8311;8989;9693;10443;11153;12429;13211;13948;14638;15339;16148;16986;17763;18394;19189	78.95925;96.96977|950.841552365015;179.476795482288	1	-0.015967	-0.0180108	0.019789	0.00276153	0.0222823	0.00315777	4.7326	5	0.24031	4.96002	6	0.428571	4.78582	5	0.296788	4.91054	6	0.378738	#NUM!	0		4.75921	10	0.259136	4.93528	12	0.401993	4.84631	11	0.324474	4.84818	11	0.332226	0.014789	1.83006	0.369734
FT230	FT230	45.0748	303.233	Arachidonic acid;Cis-8,11,14,17-Eicosatetraenoic acid;Mester	+	303.231	303.236	43.5978	45.7195	26	196;964;1702;2425;3197;4018;4979;5735;6714;7580;8419;9111;9814;10569;11279;11961;12556;13337;14059;14758;15476;16284;17109;17868;18526;19303	59.01419;67.05537;71.01381;81.03456;83.05002;127.0762;135.0808;141.0919;149.0963;149.1332;151.1488;155.1085;159.0809;163.0327;163.0763;163.1489;165.1641;177.0919;177.1647;189.1648;191.107;191.1801;203.1813;205.1237;205.1962;217.1956;219.1388;225.1866;229.1951;231.14;231.2117;233.1547;247.1697;257.2282;258.4532;259.2434;267.2112;283.2076;284.9798;285.2226;301.2173;302.3053;303.0533;303.234;303.981…	1	0.00252084	-0.0129451	0.0198806	0.0354774	0.036881	0.0324307	6.25548	6	0.955703	6.47649	6	0.980066	6.44103	6	0.978959	6.51872	6	0.982281	#NUM!	0		6.34826	12	0.973422	6.49761	12	0.980066	6.36599	12	0.9701	6.47988	12	0.980066	0.0148024	1.82967	0.369734
FT770	FT770	67.3901	822.538	PC(17:0/9-HODE);Phosphatidylethanolamine alkenyl 20;PE(DiMe(		822.536	822.541	64.9414	70.0533	26	651;1377;2118;2862;3665;4622;5387;6315;7215;8103;8818;9494;10254;10971;11687;12239;13019;13775;14425;15159;15952;16759;17577;18217;19003;19682		0	-0.0197261	-0.0175049	-0.026467	-0.00605308	0.0458686	0.0298631	5.38053	6	0.6866	5.18385	6	0.595792	5.24091	6	0.646733	5.29608	6	0.664452	#NUM!	0		5.31072	12	0.667774	5.23997	12	0.634551	5.28219	12	0.647841	5.26849	12	0.654485	0.0150275	1.82311	0.369734
FT742	FT742	68.0011	799.546	PG(18:0/18:0);PG(i-12:0/i-24:0);[3-[[2,3-dihydroxypropoxy]-h		799.544	799.548	66.2496	69.9256	18	629;2094;3638;4593;5361;6284;7186;8077;11666;12995;13747;14400;15137;15923;16735;17551;18191;18973		0	-0.0132011	-0.0413387	-0.0487199	0.0107299	0.012343	0.0463578	4.78516	5	0.27907	4.42373	2	0.0542636	4.76727	5	0.27907	4.69836	5	0.212625	#NUM!	0		4.77621	10	0.277962	4.56104	7	0.118494	4.60444	7	0.131783	4.73281	10	0.243632	0.0154204	1.81191	0.369734
FT876	FT876	238.704	929.633	TG(14:1(9Z)/20:5(5Z,8Z,11Z,14Z,17Z)/22:6(4Z,7Z,10Z,13Z,16Z,1		929.632	929.636	235.077	241.484	20	743;1464;4726;6423;7301;8198;8901;10350;11051;11776;12322;13110;14525;15237;16033;16861;17680;18305;19092;19767		0	-0.000875077	-0.0348778	0.0396883	0.0208103	0.0187827	-0.00180949	4.50007	2	0.0885936	4.80678	5	0.292359	4.77352	5	0.287929	4.94827	6	0.419712	#NUM!	0		4.63679	7	0.173865	4.87752	11	0.333333	4.65342	7	0.177187	4.86089	11	0.348837	0.0162624	1.78881	0.369734
FT113	FT113	401.893	209.004	Juglone;cis-2-Methylaconitate;(Z)-But-1-ene-1,2,4-tricarboxy	+	209.003	209.005	400.729	404.47	26	97;877;1602;2326;3098;3904;4892;5627;6597;7471;8334;9013;9719;10472;11185;11880;12462;13243;13975;14667;15376;16177;17019;17787;18424;19214	59.01408|669.776607228918	1	0.00658538	0.0069182	0.0121408	-0.000928174	0.00125385	-0.00617316	4.73865	6	0.249169	4.82857	6	0.303433	4.82362	6	0.334441	4.77768	6	0.261351	#NUM!	0		4.78114	12	0.284607	4.80312	12	0.291251	4.78361	12	0.269103	4.80065	12	0.297896	0.0165241	1.78188	0.369734
FT769	FT769	67.2935	821.534	PG(18:0/22:6(4Z,7Z,10Z,13Z,16Z,19Z));PG(18:1(11Z)/22:5(4Z,7Z		821.532	821.536	64.9414	70.0533	26	650;1375;2117;2861;3663;4621;5386;6313;7214;8102;8816;9493;10253;10970;11686;12237;13017;13774;14424;15157;15950;16758;17575;18215;19001;19681	152.9957;279.2325;280.2358;281.2486;282.2521;283.2579;285.2598;303.2317;305.2483;307.2647;328.2355;329.2479;330.2505;331.2643;417.2404;465.2415;467.2565;491.2787;509.2883;539.2767;541.2931;818.997;821.5356;821.6168;822.5334|658.095057289228;5979.35657945951;374.160394334726;10182.3240152935;286.283965839249;286.910177749152;638.643082017379;404.968864871304;1057.63783585609;326.859276085577;161.6…	1	-0.0209677	-0.0189681	-0.0261541	-0.00616554	0.046357	0.0287202	5.70123	6	0.837209	5.50283	6	0.756368	5.56194	6	0.812846	5.61938	6	0.805094	#NUM!	0		5.63159	12	0.827243	5.5611	12	0.781838	5.60203	12	0.801772	5.59066	12	0.811739	0.0167676	1.77553	0.369734
FT662	FT662	68.5529	757.537	DG(22:1(13Z)/22:6(4Z,7Z,10Z,13Z,16Z,19Z)/0:0);DG(22:2(13Z,16		757.531	757.539	67.5666	70.9683	20	564;1305;2034;2787;3577;4517;5294;6204;7123;8014;8749;11613;12935;13689;14337;15074;15865;17483;18140;19615	255.2309;267.2339;279.2331;280.2367;281.2484;282.2521;283.2638;307.2652;477.298;493.2902;495.3099;755.2106;757.5392|172.150824182597;405.285831174501;8186.89950765119;817.963247032728;8134.97532062909;444.570109807717;2290.2366108629;370.637382426327;134.260945634617;345.904555704351;376.586882602896;201.271748338831;48485.6117911453	1	-0.00204388	-0.0241651	-0.0583725	-0.0797485	-0.0103891	0.1052	5.17257	6	0.557032	4.63726	3	0.17608	4.91193	5	0.421927	4.75547	4	0.243632	#NUM!	0		5.04225	11	0.492802	4.69636	7	0.213732	4.90492	9	0.3732	4.8337	9	0.316722	0.016768	1.77552	0.369734
FT436	FT436	445.246	517.042	{[6-(5,7-dihydroxy-4-oxo-2-phenyl-4H-chromen-6-yl)-3,4,5-tri		517.04	517.044	444.102	445.741	5	7782;8579;9256;10730;17292	78.95902;96.96918;135.0308;168.9906;210.9996;347.0395;517.0385|798.671158205845;320.887702943532;143.149838457387;701.304368180557;361.454252182581;9493.90226218494;202.907109706462	1	-0.00362257	0.0235812	0.0225456	0.000912224	0.0393442	-0.0162366	4.41461	0	0.0442968	4.70058	4	0.223699	4.41461	0	0.0498339	4.50424	1	0.106312	#NUM!	0		4.41461	0	0.0442968	4.60241	5	0.148394	4.55759	4	0.104097	4.45942	1	0.0753045	0.018324	1.73698	0.383802
FT069	FT069	478.825	161.045	2-Hydroxyadipic acid;3-Hydroxyadipic acid;3-Hydroxymethylglu		161.045	161.046	478.454	479.205	5	2287;3057;3855;5584;11146		0	-0.0162879	0.0133295	-0.0223873	-0.0270714	0.0051984	0.0268672	4.44903	4	0.0642303	4.13558	0	0.0055371	4.21025	1	0.00885936	4.13558	0	0.00664452	#NUM!	0		4.32964	5	0.0199336	4.13558	0	0.00442968	4.29231	4	0.013289	4.17292	1	0.00664452	0.0184485	1.73404	0.383802
FT608	FT608	120.53	720.491	PE(16:1(9Z)/P-18:1(11Z));PE(16:1(9Z)/P-18:1(9Z));PE(18:2(9Z,		720.384	720.492	115.732	126.045	15	520;1993;3542;4451;5246;6142;7075;10858;12885;14290;15022;15820;16608;17442;18864	111.0191;225.0508;253.2168;254.2195;255.2326;256.2345;281.246;478.2925;480.312;720.3851;720.4918|187.751891157204;57.2518728522965;152.269263063334;91.4974334717954;213.0581703809;37.7319445917806;36.706629711955;68.1207998488162;185.728261641376;306.917630988278;1178.79656337129	1	-0.0445579	-0.0827594	-0.234336	0.110161	0.0404715	-0.0630142	5.73046	5	0.847176	4.72562	2	0.236988	5.19176	3	0.621262	5.19595	4	0.598007	#NUM!	0		5.46111	8	0.763012	4.96079	6	0.427464	5.22804	7	0.609081	5.19385	7	0.607973	0.0188192	1.7254	0.383802
FT376	FT376	401.03	456.016	Glucoerucin;(Methylsulfanyl)butyl glucosinolate;Glucoerucin		456.014	456.017	399.802	402.514	26	314;1078;1805;2544;3321;4174;5081;5891;6857;7728;8534;9213;9937;10681;11400;12044;12684;13461;14151;14867;15610;16411;17240;17971;18656;19418		0	0.010785	0.00952809	0.0108003	-0.00105133	0.000343351	-0.00701587	4.67146	6	0.188261	4.75765	6	0.252492	4.75405	6	0.264673	4.70014	6	0.214839	#NUM!	0		4.71275	12	0.225914	4.72889	12	0.225914	4.71455	12	0.229236	4.72709	12	0.238095	0.0191466	1.71791	0.383802
FT528	FT528	471.707	610.166	2-amino-4-{[2-({4-[3-(carboxymethyl)-4,6-dihydroxy-2-methoxy		610.165	610.167	470.834	472.694	10	446;1197;1926;2677;3459;5187;11509;12809;13583;14241	79.95731;80.96516;124.0069;136.007;137.9861;138.0231;165.5139;166.0178;208.0287;250.0384;268.0491;463.9985;608.2908;610.1667|3257.85629296293;4175.58018116075;2631.93523698485;9714.59903813615;1330.06266490561;527.316168876686;1172.22182450808;330732.258442227;659.519164484276;1414.82016537525;1898.93375491539;581.79460139784;740.537543593422;280296.109187876	1	-0.0221474	0.0678403	-0.0643205	0.0148205	-0.0386498	0.0928404	5.58012	4	0.781838	4.88106	0	0.354374	5.25672	4	0.654485	4.88106	0	0.34773	#NUM!	0		5.41842	8	0.733112	4.88106	0	0.342193	5.23059	4	0.611296	5.06889	4	0.529347	0.0201794	1.69509	0.389322
FT663	FT663	290.721	758.5	PS(16:0/18:2(9Z,12Z));PS(16:1(9Z)/18:1(9Z));PS(18:1(9Z)/16:1		758.498	758.502	288.275	292.352	17	565;1306;2035;3578;4518;7124;8015;8750;9425;10173;10902;12936;13690;15866;16665;17484;18907	152.9956;255.2328;279.2329;281.2494;391.2251;409.2362;415.2248;671.4676;758.5013|579.825058768068;2658.70116153541;1004.88281809359;124.709598863842;2156.18654435881;830.218820267987;351.949029036356;7080.04590847413;12543.7234135479	1	-0.0461469	0.0173042	0.0232931	0.0370362	-0.0335113	-0.0463112	4.7299	3	0.238095	5.07176	6	0.51495	4.64035	2	0.187154	4.83693	4	0.307863	#NUM!	0		4.68512	5	0.204873	4.95435	10	0.418605	4.90083	9	0.370986	4.73864	6	0.248062	0.0205792	1.68657	0.389322
FT022	FT022	377.297	114.056	STD_L-Proline;Proline;L-PROLINE	+	114.055	114.056	375.901	378.742	26	20;803;1508;2248;3009;3808;4810;5541;6505;7372;8266;8939;9650;10396;11101;11817;12376;13168;13904;14590;15285;16093;16935;17723;18345;19140	114.0559|3141.85516465527	1	-0.00592726	-0.00670972	0.0102728	0.0202989	0.00273446	0.00288795	4.79171	6	0.284607	4.8845	6	0.370986	4.9132	6	0.424142	4.93425	6	0.404208	#NUM!	0		4.85245	12	0.336656	4.90938	12	0.372093	4.83811	12	0.315615	4.92372	12	0.413068	0.0210983	1.67575	0.389322
FT822	FT822	65.8102	869.535	PG(22:5(4Z,7Z,10Z,13Z,16Z)/22:5(4Z,7Z,10Z,13Z,16Z));PG(22:5(		869.533	869.539	64.9414	67.3416	24	699;1425;2155;2906;3706;4675;5425;6371;7260;8152;9535;10303;11014;11730;13067;13824;14474;15195;15993;16811;17632;18263;19054;19723	283.2433;285.2576;327.2338;329.2491;331.2634;465.2425;539.2791;795.5762;795.6414;851.4233;866.8581;869.4318;869.5374;869.6183|309.336222424434;412.569509910151;1118.66602899093;7210.5063617516;1867.50750704488;201.554482498568;422.271222092422;641.114568152875;408.429878088236;806.932711570647;272.644980661153;5602.67782483977;61677.9498329453;288.801649766356	1	-0.0301252	-0.0272164	-0.0315827	-0.000109883	0.0382959	0.0136644	5.1417	6	0.533776	4.87276	5	0.33887	5.01055	5	0.493909	5.07729	6	0.516058	#NUM!	0		5.07612	11	0.522702	4.97503	11	0.447398	5.00723	11	0.45072	5.04392	11	0.51495	0.0211876	1.67392	0.389322
FT081	FT081	438.601	171.006	Beta-Glycerophosphoric acid;rac-Glycerol 3-phosphoate;Glycer	+	171.006	171.007	437.329	440.335	25	71;850;1564;2296;3067;3864;4864;5593;6564;7433;8313;8991;9696;10445;11155;12431;13214;13950;14640;15342;16150;16989;17765;18397;19191	78.95904;96.96951;171.0063|19760.5565479434;658.909197085789;783.823791433541	1	-0.0443056	0.0344655	-0.0446956	0.0186229	0.0002761	0.0196453	5.39336	6	0.69546	5.03944	6	0.496124	4.90713	5	0.418605	5.04527	6	0.495017	#NUM!	0		5.15024	11	0.566999	5.04236	12	0.502769	5.2164	12	0.600221	4.9762	11	0.452935	0.0222027	1.65359	0.39475
FT136	FT136	49.6634	227.201	Ethyl dodecanoate;Myristic acid;2,6,10-Trimethylundecanoic a	+	227.132	227.202	47.5772	51.8175	20	894;3119;3924;4909;6617;7491;8353;9029;9738;10487;11205;11899;12481;13257;14684;16195;17038;17805;18445;19232	227.2011|11050.7654331412	1	-0.00194502	-0.0235466	0.0347588	0.0334613	-0.00842155	-0.0299816	5.10189	3	0.499446	5.39303	6	0.708749	5.31316	5	0.693245	5.33034	5	0.678848	#NUM!	0		5.20753	8	0.610188	5.36168	11	0.699889	5.24746	9	0.62237	5.32175	10	0.689922	0.0227236	1.64352	0.39475
FT290	FT290	104.074	351.217	Prostaglandin E2;(13E)-11a-Hydroxy-9,15-dioxoprost-13-enoic		351.216	351.218	101.47	109.255	24	246;1010;1740;2472;3249;4078;5799;6767;7637;8467;9155;9870;10617;11325;11996;12606;13387;14802;15531;16335;17161;17912;18577;19348	59.01411;67.05528;109.0655;113.0967;121.0656;135.0811;159.0816;161.0969;163.1128;173.0969;174.1041;175.1127;187.1126;189.1281;191.1436;203.1436;204.1154;206.131;207.1029;217.1229;217.1597;233.1184;235.1337;243.176;253.1963;269.1906;271.2069;289.2168;297.1866;315.1963;333.207;351.2115|405.057595426594;512.945346738726;863.423905059165;1313.07271382735;859.432980918503;1391.08226171488;743.96729931…	1	-0.0391963	-0.0394191	0.078073	0.0256231	0.053653	-0.0110046	5.06846	5	0.48062	5.45419	6	0.735327	5.2905	5	0.673311	5.6585	6	0.82392	#NUM!	0		5.17948	10	0.589147	5.55634	12	0.780731	5.26133	11	0.631229	5.4745	11	0.757475	0.0228257	1.64158	0.39475
FT774	FT774	290.151	831.504	Phosphatidylinositol 16;PC(DiMe(9,3)/DiMe(9,3));PI(16:0/16:0		831.503	831.506	288.275	291.868	24	656;1384;2122;2865;3669;4628;5393;6323;7221;8110;8823;9498;10259;10975;11692;13024;13783;14430;15957;16762;17585;18224;19008;19685	152.9958;223.0009;241.0117;253.2174;255.2332;259.0219;277.2173;279.2331;297.0375;315.0482;389.2095;391.2249;409.2359;413.21;415.2254;551.2622;553.2786;569.2732;571.2886;575.2622;577.2788;671.4672;828.9396;831.5068;832.5088;833.5215;834.5313;835.5379|2005.78059610172;2223.67808775974;10223.1967562815;3315.41881956023;8640.04979382272;610.822710046745;8198.87132935313;3433.97341723676;1691.99148147…	1	-0.0351296	0.014459	0.0173065	0.0076543	-0.00692606	0.0347842	5.56164	6	0.772979	5.72214	6	0.849391	5.34798	4	0.709856	5.64232	6	0.818383	#NUM!	0		5.45481	10	0.757475	5.68223	12	0.83278	5.64189	12	0.819491	5.49515	10	0.765227	0.0253007	1.59687	0.417156
FT671	FT671	476.571	763.193	Troxerutin;Naringin 4'-glucoside;Narirutin 4'-glucoside		763.191	763.195	475.42	477.899	21	571;1312;2041;2793;3585;4525;5301;6212;7132;8023;8756;9430;10181;10908;11621;13698;14344;15872;17491;18147;19620	78.95888;96.96946;138.9797;168.9904;199.0011;223.0014;241.0116;258.2317;259.0228;763.1939|1912.46342866477;20607.9408113955;3900.32372525095;9116.81278783832;17616.7282056462;2009.75896839779;978.451818195623;849.566112260322;275358.850547499;119603.052837319	1	-0.0199215	0.020729	-0.0269852	-0.102679	-0.0149842	0.119366	5.44326	6	0.722038	5.07624	6	0.517165	5.06436	3	0.528239	4.89256	4	0.364341	#NUM!	0		5.25381	9	0.640089	4.9844	10	0.457364	5.25975	12	0.630122	4.97846	7	0.458472	0.0254764	1.59386	0.417156
FT310	FT310	401.293	373.01	NCGC00380847-01!(1R)-2-chloro-1,7-dihydroxy-3,9-dimethoxy-1-		373.008	373.011	399.802	403.083	26	260;1026;1750;2483;3258;4094;5032;5817;6785;7655;8482;9168;9884;10630;11338;12005;12622;13403;14108;14819;15547;16350;17178;17926;18596;19364	59.0141;127.0011;141.0166;209.0042;223.0197;291.0073|24178.7286873132;56892.9381765932;52957.9030910309;5792.76189619589;2440.73848352379;2018.55237471099	1	0.00981116	0.0105103	0.0112505	-0.000188884	3.43988e-05	-0.00684198	5.45341	6	0.728682	5.54786	6	0.780731	5.53724	6	0.799557	5.4877	6	0.749723	#NUM!	0		5.49533	12	0.770764	5.51778	12	0.766334	5.50064	12	0.75969	5.51247	12	0.771872	0.0265437	1.57604	0.417156
FT394	FT394	289.456	481.312	13'-Carboxy-gamma-tocopherol;(3beta,5alpha,6beta,7alpha,22E,		481.311	481.313	287.63	291.805	19	334;1093;1824;2565;3340;6873;7747;8553;9232;9955;10698;12061;12705;13480;14881;15629;17263;17985;19434		0	-0.019387	0.0347945	0.0516193	0.0148232	0.00966302	-0.00311296	4.72704	3	0.232558	5.01516	6	0.469546	4.76535	4	0.277962	4.84929	4	0.317829	#NUM!	0		4.74619	7	0.248062	4.93223	10	0.395349	4.8711	9	0.341085	4.80732	8	0.300111	0.0266835	1.57376	0.417156
FT740	FT740	68.0011	797.533	PG(16:0/22:4(7Z,10Z,13Z,16Z));PG(18:0/20:4(5Z,8Z,11Z,14Z));P		797.531	797.535	66.2496	70.0533	24	625;1352;2091;2836;3634;4589;5357;6278;7182;8073;8795;9471;10228;11664;12992;13745;14397;15134;15921;16732;17547;18189;18970;19660	152.9953;255.2328;279.2323;280.2368;281.2484;282.2534;283.2593;303.2335;304.2366;305.2485;306.2521;307.2623;331.2641;417.2386;441.2371;491.2771;515.2744;795.0584;797.5346|221.274011755786;342.957321107021;1152.00463727996;102.876770819694;4878.97878307939;375.503937655392;358.934587981753;660.898022653876;409.309606024246;5541.90361973775;240.87315530349;1093.58713261665;480.091797641614;79.10124…	1	-0.021535	-0.0224541	-0.0239457	-0.00130228	0.0444588	0.0455051	5.43423	6	0.717608	5.19965	5	0.609081	5.30204	5	0.684385	5.36868	6	0.704319	#NUM!	0		5.36813	11	0.703212	5.28417	11	0.664452	5.31694	11	0.672204	5.33536	11	0.697674	0.0269734	1.56906	0.417156
FT791	FT791	66.179	845.534	PG(22:6(4Z,7Z,10Z,13Z,16Z,19Z)/20:2(11Z,14Z));PG(18:0/22:5(4		845.532	845.536	64.9414	67.6219	24	675;1400;2139;2884;3683;4649;5407;6344;7236;8130;9514;10278;10993;11708;13040;13802;14450;15175;15971;16783;17605;18240;19028;19700	152.9958;259.2419;303.2327;304.2368;305.2484;307.2633;327.2339;329.2482;330.2528;331.2631;513.262;541.2911;771.5745;771.6427;845.4326;845.5356;845.6087;846.5349|369.397417440585;192.473709404226;5592.22974657636;447.853681673206;3800.45936862474;379.736486803893;172.083737548962;3389.35926059434;396.235921955974;5870.52834955257;152.577998273728;221.322780578316;848.840897230866;252.558650573644;…	1	-0.0298864	-0.0217048	-0.0311329	0.00748684	0.031769	0.0227485	5.24835	6	0.609081	4.98935	5	0.45072	5.07617	5	0.539313	5.14293	6	0.561462	#NUM!	0		5.16226	11	0.570321	5.06614	11	0.517165	5.11885	11	0.531561	5.10955	11	0.555925	0.0273173	1.56356	0.417156
FT374	FT374	401.103	455.013	Halosulfuron-methyl;[1-(2H-1,3-benzodioxol-5-yl)-3-(4-methox		455.011	455.014	399.802	403.083	26	312;1076;1803;2542;3319;4172;5079;5889;6855;7726;8533;9212;9935;10680;11398;12043;12682;13459;14149;14866;15608;16409;17239;17970;18654;19416	59.01408;127.001;141.0166;209.0042;223.0196;291.0073;305.0228;373.0102|23483.9463320425;94197.8286981703;116033.58567786;22401.244454432;15259.4316874035;27636.8083583392;9177.55722562083;6048.45386355309	1	0.0102475	0.00983115	0.0109128	-0.000300121	0.000272375	-0.00690677	5.54725	6	0.769657	5.6374	6	0.817276	5.63053	6	0.834994	5.58779	6	0.790698	#NUM!	0		5.58889	12	0.808416	5.61259	12	0.809524	5.59232	12	0.79845	5.60916	12	0.821705	0.027432	1.56174	0.417156
FT650	FT650	117.108	747.519	PG(16:0/18:1(11Z));PG(16:0/18:1(9Z));PG(16:1(9Z)/18:0)		747.517	747.52	113.237	122.956	26	553;1293;2022;2777;3569;4502;5281;6189;7113;8004;8737;9418;10163;10892;11602;12171;12923;13677;14323;15062;15855;16650;17473;18131;18897;19606	152.9956;171.0062;209.0215;227.0327;253.2172;254.2202;255.2328;256.236;257.2391;279.2327;280.2364;280.3884;281.2489;282.2526;283.2622;391.225;409.2352;417.2401;465.2621;483.2718;491.278;509.288;673.4829;687.5456;745.2144;746.5041;747.5209;748.5201|15001.2341585516;4733.29875486299;939.300800631506;2544.94520313064;7083.28844311796;1095.8442117563;126850.099811313;4564.89567448683;1613.94443024526…	1	-0.0232852	-0.0601685	-0.112464	0.0422465	0.0477857	-0.00520901	6.54807	6	0.980066	6.06158	6	0.93134	6.42298	6	0.977852	6.39857	6	0.976744	#NUM!	0		6.48553	12	0.978959	6.23008	12	0.955703	6.30483	12	0.966777	6.41077	12	0.976744	0.0291725	1.53503	0.436105
FT221	FT221	60.5426	295.228	FA 18:2+1O;FA 18:2+1O;9-HODE	+	295.227	295.229	59.2118	61.8975	23	186;956;2415;3188;4006;5721;6704;7568;8409;9100;9807;10561;11269;11953;12545;13328;14747;15465;16272;17100;17857;18515;19293	59.01422;171.1026;195.1387;217.0719;235.0825;259.2068;277.2174;295.0679;295.2283|589.802246218887;30963.8317076285;8603.92756389202;1781.30573052087;1259.55437544568;828.915060329615;88953.4965088554;1155.65796946599;121844.168796186	1	-0.0131356	-0.0321008	0.0620076	0.000296102	0.0345994	-0.0316101	5.06192	4	0.475083	5.39862	6	0.714286	5.36065	5	0.717608	5.47982	6	0.746401	#NUM!	0		5.21129	9	0.614618	5.43922	12	0.738649	5.23027	10	0.610188	5.42024	11	0.732004	0.0297961	1.52584	0.438002
FT164	FT164	47.0519	253.217	STD_Palmitoleic acid ;Palmitelaidic acid;Palmitoleic acid	+	253.215	253.218	45.6663	48.326	26	138;914;1648;2367;3142;3950;4931;5670;6649;7514;8369;9056;9761;10512;11224;11914;12499;13279;14013;14704;15415;16219;17057;17822;18470;19250	253.2173|68964.7709597877	1	-0.0215769	-0.0230365	0.0319689	0.0309388	-0.0122291	-0.00495555	5.34866	6	0.662237	5.55164	6	0.781838	5.54126	6	0.801772	5.62408	6	0.812846	#NUM!	0		5.44496	12	0.746401	5.58786	12	0.795127	5.45015	12	0.735327	5.58267	12	0.805094	0.0308554	1.51067	0.441609
FT737	FT737	67.6822	796.523	PE(22:5(4Z,7Z,10Z,13Z,16Z)/P-18:1(11Z));PE(22:5(4Z,7Z,10Z,13		796.521	796.554	56.6805	70.0533	24	623;2089;2834;3632;4587;5356;6276;7180;8071;8794;9469;10226;11662;12990;13743;14395;15132;15919;16730;17545;18187;18967;18968;19659		0	-0.0251927	-0.0262144	-0.0302597	-0.00106574	0.049879	0.0479715	5.43035	6	0.715393	5.17799	5	0.589147	5.25686	5	0.655592	5.33506	6	0.682171	#NUM!	0		5.34361	11	0.688815	5.25652	11	0.646733	5.30417	11	0.658915	5.29596	11	0.676633	0.0318683	1.49664	0.441609
FT236	FT236	44.8408	305.247	STD_Stearic acid ;Ethyl hexadecanoate;16-Methylheptadecanoic		305.245	305.248	43.5978	45.7195	24	201;969;1707;2431;3202;5739;6719;7585;8423;9116;9819;10574;11284;11964;12561;13343;14062;14762;15481;16289;17114;17871;18531;19306	59.01395;71.0141;207.2096;233.227;259.2433;261.2549;287.2369;303.2325;304.3148;305.2482|2175.74828005909;328.108629239398;547.132465730424;988.44466837088;313.110386219876;4847.39680346268;2754.12521690305;1463.74950538344;1430.13540844912;425369.761019872	1	-0.00494722	-0.00435256	0.0640017	0.0422153	0.0413703	0.0230374	5.35203	4	0.669989	5.76096	6	0.86711	5.71081	6	0.85825	5.78814	6	0.864895	#NUM!	0		5.53142	10	0.785161	5.77455	12	0.869324	5.5565	10	0.782946	5.74948	12	0.869324	0.0319452	1.49559	0.441609
FT661	FT661	68.6468	756.527	PE(18:1/13-HODE);PE(18:1/9-HODE)		756.526	756.528	67.9061	70.9683	15	563;1304;2033;2786;4516;5293;6203;7122;8013;8748;11612;13688;14336;15073;15864		0	-0.00543204	-0.0242814	-0.0661596	-0.0894805	-0.0465684	0.0704894	4.97195	5	0.418605	4.5158	3	0.0941307	4.68281	4	0.221484	4.43857	1	0.076412	#NUM!	0		4.82738	9	0.321152	4.47718	4	0.0819491	4.74387	8	0.245847	4.56069	5	0.129568	0.0322232	1.49183	0.441609
FT216	FT216	42.1525	291.091	Climbazol;1-(9H-Pyrido[3,4-b]indol-1-yl)-1,4-butanediol;Chlo		291.087	291.092	39.9145	43.7665	16	952;2411;3184;6702;8405;9095;9803;10558;11267;12541;14745;15461;16268;17097;17854;19289	74.99088;79.95795;143.0525;149.009;159.0841;192.9815;209.0122;217.0722;275.0584;289.0751;291.0907;291.2005|584.79187283477;234.864075211269;721.096485745548;1576.04559902767;2375.44172058637;899.519134826859;2449.97358333431;1371.79462129835;505.421073028742;1698.26171030776;51335.1060201912;824.591972825561	1	0.00515064	0.0115484	0.038873	0.0502698	0.0527469	0.0119904	4.93573	2	0.390919	5.21309	5	0.620155	5.0659	3	0.531561	5.25933	5	0.638981	#NUM!	0		5.00081	5	0.464009	5.23621	10	0.631229	5.07441	7	0.504983	5.16261	8	0.591362	0.0325449	1.48752	0.441609
FT660	FT660	68.4589	755.523	DG(22:2(13Z,16Z)/22:6(4Z,7Z,10Z,13Z,16Z,19Z)/0:0);DG(22:4(7Z		755.521	755.525	67.671	71.4098	23	562;1303;2032;2785;3576;4515;5292;6202;7121;8012;8747;10172;10901;11611;12934;13687;14335;15072;15863;16664;17482;18139;19614	155.0107;255.2324;277.2169;279.2327;280.2369;281.2487;303.2357;304.2385;305.2486;475.2818;493.2927;753.1851;755.5253;755.5891|131.01588666226;778.715168656163;356.838457649678;16549.1615848829;259.305354717412;7630.01383351997;245.304259864719;195.539051676144;1937.0626306939;234.919109492967;932.071140762412;136.312099016254;59674.1009680953;166.61232545959	1	-0.0112534	-0.0232306	-0.0649897	-0.0660125	-0.0203732	0.0732714	5.34223	6	0.6567	4.93308	5	0.408638	5.03144	5	0.503876	4.94018	5	0.410853	#NUM!	0		5.18684	11	0.598007	4.93663	10	0.403101	5.13766	11	0.54485	4.98581	10	0.466224	0.0338746	1.47013	0.452687
FT462	FT462	400.991	538.019			538.017	538.021	399.802	402.514	26	391;1146;1877;2622;3397;4281;5141;5979;6929;7807;8597;9275;10008;10751;11462;12089;12758;13529;14200;14918;15686;16490;17313;18015;18734;19472		0	0.00982564	0.0108195	0.0105798	0.000125369	0.000243448	-0.00697869	4.86587	6	0.334441	4.95632	6	0.427464	4.95248	6	0.452935	4.89321	6	0.365449	#NUM!	0		4.90917	12	0.379845	4.92477	12	0.386489	4.9111	12	0.379845	4.92285	12	0.41196	0.0349408	1.45667	0.457154
FT877	FT877	239.622	930.638			930.633	930.644	236.41	241.675	21	744;1465;4727;6424;7302;8199;8902;10351;11052;11777;12323;13111;13866;14526;15238;16034;16862;17681;18306;19093;19768		0	-0.00188136	-0.0385214	0.0398365	0.00193338	-0.00449223	-0.00249443	4.50728	2	0.0919158	4.758	5	0.253599	4.81394	6	0.324474	4.82438	6	0.295681	#NUM!	0		4.66061	8	0.188261	4.79119	11	0.280177	4.63264	7	0.161683	4.81916	12	0.307863	0.0354782	1.45004	0.457154
FT593	FT593	251.905	712.493	PE(14:0/20:3(5Z,8Z,11Z));PE(14:0/20:3(8Z,11Z,14Z));PE(14:1(9		712.49	712.494	250.514	253.479	13	507;1248;4437;7954;8699;9380;10119;10845;11560;12141;12871;16595;18093	253.2166;255.2324;277.2166;279.2328;450.2632;452.2795;712.4944|2990.67552724216;3020.93505549849;8288.91490795088;9078.17672591905;380.490103380441;322.260009130434;31696.2166597009	1	-0.00340931	0.0176521	0.00316584	0.0154664	0.00680997	-0.0255329	4.54416	1	0.109635	4.91044	5	0.390919	4.66172	3	0.207087	4.61035	2	0.165006	#NUM!	0		4.60294	4	0.151717	4.7604	7	0.254707	4.7273	6	0.238095	4.63604	5	0.182724	0.0357637	1.44656	0.457154
FT776	FT776	289.836	833.519	PI(16:0/18:2(9Z,12Z));PI(16:1(9Z)/18:1(11Z));PI(16:1(9Z)/18:		833.518	833.522	288.275	291.597	26	658;1386;2124;2867;3671;4630;5395;6325;7223;8112;8825;9500;10261;10977;11694;12246;13026;13785;14432;15163;15959;16764;17587;18226;19010;19687	78.95879;152.9954;223.001;241.0118;253.2171;255.2326;259.0227;279.2327;281.2483;297.0381;315.049;389.2095;391.2253;392.2266;409.2354;415.2246;417.2402;435.2495;551.2622;553.2779;569.2713;571.2883;577.2784;579.2936;595.2877;597.3043;671.4647;746.4874;830.9468;832.5087;833.5205;834.5248;834.9769;835.5332;836.5392|604.614140923198;7749.78642538672;8533.49600954951;40887.4512511084;6926.33533890865;4…	1	-0.0200623	-0.000351466	0.0192973	0.0153496	-5.36063e-05	0.0319433	6.20872	6	0.949059	6.3648	6	0.971207	6.16766	6	0.953488	6.34032	6	0.971207	#NUM!	0		6.18819	12	0.952381	6.35256	12	0.972315	6.28676	12	0.964563	6.25399	12	0.96567	0.0367791	1.4344	0.463417
FT119	FT119	40.9221	212.002	Indoxyl sulfate;Carmustine;Sulforaphane		212.002	212.003	39.678	41.7075	18	100;1605;2331;3102;3909;4894;5631;7476;8336;9015;11187;11884;12465;13978;14670;15379;16180;17790	77.03965;79.95732;80.96505;104.0502;131.0372;132.0451;212.0023|7318.79721476048;70863.2524098294;19774.1318207682;3558.97858138763;5998.4552355893;60242.4079482087;43704.7748372191	1	0.0329089	0.0184224	-0.0995423	-0.0310935	-0.0360621	0.103818	5.46524	6	0.737542	4.8955	3	0.378738	5.29252	5	0.674419	4.90135	3	0.370986	#NUM!	0		5.37888	11	0.710963	4.89842	6	0.363234	5.18037	9	0.579181	5.09693	8	0.54485	0.038306	1.41673	0.468164
FT241	FT241	45.0748	306.25	1-desoxymethylsphinganine		306.249	306.251	43.9635	45.6394	14	206;5743;6723;7589;8428;9824;12565;13346;14766;15486;16293;17118;17876;18534		0	-0.0193775	-0.0402258	0.0480151	0.0224367	0.0287726	0.0118403	4.57875	1	0.131783	4.93029	4	0.405316	4.7925	3	0.30454	4.9957	5	0.458472	#NUM!	0		4.68563	4	0.20598	4.96299	9	0.431894	4.75452	5	0.250277	4.8941	8	0.390919	0.0384385	1.41523	0.468164
FT777	FT777	289.836	834.524	PS(18:0/20:3(8Z,11Z,14Z));PS(20:3(8Z,11Z,14Z)/18:0);PS(16:1(		834.522	834.526	288.275	291.597	26	659;1387;2125;2868;3672;4631;5397;6326;7224;8113;8826;9501;10262;10978;11695;12247;13027;13786;14434;15164;15960;16765;17588;18227;19011;19688		0	-0.018287	-0.000738294	0.0169722	0.0131253	0.000999013	0.0285534	5.904	6	0.891473	6.04892	6	0.929125	5.86422	6	0.899225	6.02378	6	0.925803	#NUM!	0		5.88411	12	0.90144	6.03635	12	0.925803	5.97646	12	0.919158	5.944	12	0.914729	0.0387483	1.41175	0.468164
FT246	FT246	329.427	310.114	MMV688345;Arginyl-Aspartic acid;Aspartyl-Arginine		310.113	310.115	326.392	331.685	20	211;977;4029;5747;6727;8433;9122;9829;10581;11291;12570;13351;14072;14769;15491;16297;17122;17880;18539;19312	59.0141;89.02438;100.0401;119.0347|5768.82085275003;51129.8782914378;2271.82184989201;2797.07356057855	1	-0.00088708	-0.0328989	0.0355315	0.0284142	0.0227939	0.00332983	4.54483	2	0.110742	4.77364	5	0.263566	4.8436	5	0.352159	4.98482	6	0.45072	#NUM!	0		4.69421	7	0.21041	4.87923	11	0.336656	4.65923	7	0.181617	4.91421	11	0.405316	0.0397854	1.40028	0.46896
FT657	FT657	68.4165	753.508	PA(15:0/22:0);PA(20:0/17:0);PA(21:0/16:0)		753.506	753.511	67.2906	70.0533	23	559;1301;2030;2784;3575;4512;5290;6198;7120;8010;8745;10171;10900;11609;12931;13684;14331;15069;15861;16661;17480;18137;19613	136.9994;155.0111;211.0373;255.2324;259.2419;277.2163;279.2327;281.2487;303.2328;305.2503;449.2667;467.2772;473.2673;491.2778;751.1899;753.5095;753.583|124.072480139087;236.527411875741;112.716061347342;4988.34237437862;631.640877367985;1405.39323259514;10852.0776988403;783.555218063347;13171.3262204685;166.202239243466;248.027717231071;1385.30503973205;168.488426303725;580.613289258474;276.87646…	1	-0.0108375	-0.019414	-0.059367	-0.0555151	-0.0193434	0.0711799	5.24967	6	0.610188	4.89176	5	0.375415	4.98046	5	0.47619	4.8896	5	0.362126	#NUM!	0		5.11507	11	0.545958	4.89068	10	0.359911	5.07071	11	0.500554	4.93503	10	0.421927	0.0408172	1.38916	0.46896
FT062	FT062	65.5897	155.002	Methyl phenyl disulfide;2,5-Furandicarboxylic acid		155.001	155.002	64.1575	68.5643	20	54;1544;2278;3048;3845;4847;5574;6544;7413;8976;10428;11137;11847;12414;13198;14626;15319;16133;16973;19176	59.01391;79.95729;96.95969;155.0013|344.373579531798;932.553314369544;2821.18950921569;1401.64865414773	1	-0.0199964	0.0152526	-0.0572464	-0.0243757	-0.0142938	-0.0268498	4.95818	6	0.406423	4.63051	4	0.17165	4.65869	5	0.203765	4.58978	4	0.150609	#NUM!	0		4.80844	11	0.306755	4.61015	8	0.156146	4.79435	10	0.276855	4.62424	9	0.177187	0.0417489	1.37935	0.46896
FT645	FT645	117.41	745.503	PG(16:0/18:2(9Z,12Z));PG(16:1(9Z)/18:1(11Z));PG(16:1(9Z)/18:		745.502	745.505	113.237	124.337	21	549;1289;2020;2775;3566;4493;5276;6183;7999;9413;10158;10886;11600;12919;13674;14319;15056;16643;17469;18892;19602	152.9955;171.0057;209.0214;227.0322;253.217;254.2204;255.2329;256.2352;277.2169;278.2203;278.3794;279.2331;280.2369;281.2483;282.251;389.2094;391.2253;415.2246;417.2414;463.2457;465.2619;481.2567;483.2722;489.2613;491.2768;507.2721;509.2878;671.4671;743.2049;745.5049;746.5047;747.5169|12598.021560897;3707.5600411075;816.067410131255;2274.12950931865;32000.3428393111;552.34112924206;85250.37304513…	1	-0.0695634	-0.0886702	-0.182644	0.0597015	0.08073	-0.0537502	6.47765	6	0.974529	5.68326	4	0.834994	6.16999	5	0.954596	6.02083	4	0.924695	#NUM!	0		6.32382	11	0.972315	5.85204	8	0.890365	6.08045	10	0.937984	6.09541	9	0.941307	0.0432229	1.36429	0.46896
FT375	FT375	435.174	455.086	Sulfinpyrazone sulfone;MMV026020;Doripenem		455.084	455.089	434.158	436.341	19	313;1077;1804;2543;3320;4173;5080;5890;6856;7727;9936;11399;12683;13460;14150;15609;16410;18655;19417	129.0192;147.0304;191.0184;217.0146;231.0329;249.0403;333.063;361.0579;405.0464;423.0591;455.0863;455.1337|172.51882306376;136.445461114792;227.659885696664;337.530810952231;191.724959197296;65.0972438423764;89.1091492142664;83.1810246967166;170.557142845985;437.790977252726;1132.90346745549;73.6349193107799	1	-0.0334504	-0.0107825	-0.0229217	0.00208357	-0.030681	0.027225	4.88493	6	0.358804	4.65526	3	0.189369	4.80556	4	0.315615	4.77606	4	0.259136	#NUM!	0		4.84524	10	0.331118	4.71566	7	0.221484	4.77009	9	0.259136	4.79081	8	0.287929	0.0441144	1.35542	0.46896
FT382	FT382	285.032	464.313	STD_Glycocholic acid;STD_Glycohyocholic acid;Phosphatidyleth		464.312	464.314	282.895	287.762	26	321;1084;1812;2550;3326;4183;5085;5899;6863;7736;8540;9220;9944;10688;11406;12048;12693;13467;14157;14871;15617;16416;17246;17975;18662;19424	78.95888;140.0114;152.9954;196.0379;265.2533;267.2691;403.2605;464.3141|2812.61791151021;3562.1381596371;352.996282863518;8071.31041380994;456.684103430413;8626.84192225944;2177.9715447919;63093.8796148512	1	-0.00146191	0.00303039	0.0126805	4.01945e-05	0.0208999	-0.0113201	5.28609	6	0.632337	5.37593	6	0.698782	5.30096	6	0.683278	5.36744	6	0.702104	#NUM!	0		5.29353	12	0.660022	5.37168	12	0.705426	5.33101	12	0.682171	5.3342	12	0.69546	0.0443313	1.35329	0.46896
FT363	FT363	443.06	448.112	Crizotinib (PF-02341066);Crizotinib (PF-02341066);MMV007133		448.112	448.113	440.041	445.137	24	302;1066;1793;2532;3306;4160;5068;5874;7713;8522;9205;9924;10673;11388;12672;13449;14140;14859;15598;16398;17230;17963;18644;19409	79.95732;80.96512;108.9961;124.0069;136.0072;137.986;138.0226;165.514;166.0178;208.0276;250.039;268.0492;273.0375;448.1125|14067.7796506544;15431.6566209192;524.408467117524;6231.63362812353;25856.0515443275;3598.419237179;1681.1771485902;1622.50149577339;485062.012006468;1723.36573067656;1612.16615385909;2606.79593521664;626.899283496437;82435.2834940616	1	-0.0369195	0.0487418	-0.0845052	-0.0101651	-0.0366792	0.123767	5.8067	6	0.872647	5.29322	5	0.657807	5.49747	5	0.781838	5.2068	6	0.604651	#NUM!	0		5.65208	11	0.836102	5.25001	11	0.643411	5.54996	11	0.779623	5.35213	11	0.704319	0.0452439	1.34444	0.46896
FT225	FT225	60.3812	299.259	(R)-3-Hydroxy-Octadecanoic acid;xi-10-Hydroxyoctadecanoic ac		299.258	299.26	59.2118	61.8975	21	191;1696;2420;3192;4012;4974;5729;7575;8414;9105;11273;11957;12551;14053;14752;15471;16278;17103;17863;18520;19298	155.1432;253.2537;281.2479;282.9943;297.243;298.3439;299.2594|590.697325207228;4494.93991464243;4801.79625738965;1041.13133759968;2482.01632058628;594.720575113081;189976.083169498	1	0.0351458	0.00742663	-0.0361761	-0.00732497	0.0466475	0.0414834	5.14278	6	0.535991	4.84305	3	0.3134	5.12746	5	0.580288	5.12525	6	0.554817	#NUM!	0		5.13512	11	0.557032	4.98415	9	0.456257	4.99291	9	0.44186	5.12636	11	0.566999	0.0466178	1.33145	0.46896
FT025	FT025	418.269	118.051	STD_L-Threonine;L-Allothreonine;Threonine	+	118.051	118.051	416.274	429.026	26	22;805;1511;2250;3011;3810;4812;5543;6507;7374;8268;8942;9652;10398;11103;11820;12378;13170;13906;14593;15287;16095;16938;17725;18347;19142	74.02475;118.0505|25750.5031102354;1155.99489191077	1	-0.0322992	-0.013988	0.023676	0.0383099	0.0152094	-0.0095421	5.19136	6	0.570321	5.35789	6	0.69103	5.25263	6	0.65227	5.43871	6	0.728682	#NUM!	0		5.222	12	0.619048	5.3983	12	0.718715	5.27463	12	0.637874	5.34567	12	0.702104	0.0473485	1.32469	0.46896
FT353	FT353	374.482	436.905			436.904	436.906	371.946	376.033	26	294;1058;1786;2524;3298;4149;5063;5862;6831;7703;8513;9195;9916;10665;11379;12035;12662;13441;14137;14853;15590;16389;17222;17954;18635;19398	59.01411;141.0167;142.9751;156.9906;240.952|5689.54807643567;1689.15137920809;8571.71568214367;8096.26669665093;326.691029021868	1	-0.0108188	0.0135762	0.00812638	0.000743726	0.0002534	-0.00404496	4.9936	6	0.436323	5.09309	6	0.530454	4.94567	6	0.44629	4.9795	6	0.444075	#NUM!	0		4.96963	12	0.436323	5.0363	12	0.493909	5.04334	12	0.48505	4.96258	12	0.440753	0.0474603	1.32367	0.46896
FT578	FT578	243.13	694.482	PE(18:4(6Z,9Z,12Z,15Z)/P-16:0);PE(P-16:0/18:4(6Z,9Z,12Z,15Z)		694.48	694.483	240.186	246.109	14	1237;2725;7047;7942;8687;9363;10106;13625;14268;15793;17417;18086;18841;19554	259.2417;303.2329;390.243;408.2505;694.4828|142.322581161261;3436.43190938629;219.5187601366;661.958371667762;6404.46972591018	1	-0.0100805	0.00446966	0.0743428	-0.00904678	-0.00600555	0.0194498	4.55005	1	0.112957	4.8278	5	0.302326	4.5865	2	0.158361	4.91912	5	0.388704	#NUM!	0		4.56827	3	0.121816	4.87346	10	0.331118	4.68892	6	0.203765	4.75281	7	0.255814	0.04858	1.31354	0.46896
FT040	FT040	48.227	131.061	1-Methylpyrrolo[1,2-a]pyrazine;4-Methylpyrrolo[1,2-a]pyrazin		131.061	131.062	46.5958	63.0075	17	815;3822;5553;7386;8279;8280;8953;9663;10408;11114;11831;13915;14603;16108;17735;18359;19154	100.933;115.0298;116.038;130.0533;131.0612|470.668287197049;2455.64995131886;1197.18327285401;2850.7761706481;17303.3222474359	1	0.0382717	-0.0166293	0.0269572	-0.0129015	0.0305003	-0.016992	4.62624	2	0.166113	4.88399	5	0.369878	4.88005	4	0.380952	4.84741	4	0.316722	#NUM!	0		4.75314	6	0.251384	4.8657	9	0.320044	4.75511	7	0.251384	4.86373	8	0.352159	0.0492976	1.30717	0.46896
FT866	FT866	242.908	917.598			917.596	917.6	239.539	244.792	26	734;1457;2185;2940;3736;4719;5458;6412;7294;8190;8893;9580;10342;11042;11766;12311;13101;13859;14514;15227;16025;16851;17671;18297;19084;19758		0	-0.00577246	-0.0163673	0.0146514	0.010472	-0.0115466	0.017315	5.48748	6	0.753045	5.60428	6	0.803987	5.59702	6	0.819491	5.62564	6	0.815061	#NUM!	0		5.54225	12	0.788483	5.61496	12	0.811739	5.54588	12	0.777409	5.61133	12	0.822813	0.0496397	1.30417	0.46896
FT701	FT701	45.3435	773.533	PG(18:0/18:2(9Z,12Z));PG(18:1(11Z)/18:1(11Z));PG(18:1(11Z)/1		773.532	773.537	43.9793	46.5553	10	4551;5322;6241;12962;14366;15104;16696;17514;18938;19640	152.9951;171.007;209.0224;227.0328;255.2322;256.2407;277.2154;278.2191;279.2323;280.2367;280.3906;281.2488;282.2511;283.2624;284.2611;304.2374;305.2483;306.2516;307.264;415.2243;417.2412;418.2456;419.2565;435.2507;489.2617;491.2775;492.2793;493.2899;509.2867;511.3027;699.5401;713.5618;741.4995;771.1468;772.5188;773.5354;774.5389|1627.96660418762;256.320653147286;94.5286377851261;190.057347056209;…	1	0.00708998	-0.119757	-0.102098	0.0171476	0.143836	-0.0349166	5.48959	3	0.754153	4.88106	0	0.354374	5.40398	3	0.734219	5.6761	4	0.830565	#NUM!	0		5.44678	6	0.747508	5.27858	4	0.657807	5.18532	3	0.582503	5.54004	7	0.781838	0.0497896	1.30286	0.46896
FT398	FT398	407.622	484.039	Chondroitin sulfate;Adenylsuccinic acid;N(6)-(1,2-dicarboxye		484.037	484.04	406.478	408.594	23	338;1097;1828;3344;4206;5919;6877;7752;8555;9233;9958;10701;11422;12062;12709;13485;14883;15631;16432;17266;17986;18678;19435	88.04028;127.0009;141.0169;156.0273;170.043;238.0313;252.0462;320.0339;402.0405|1145.68649553959;1202.25697726387;1155.48036003704;2010.13550565321;3838.16904952232;327.301841634909;247.589200276074;656.623237933991;195.80566002287	1	-0.0182289	-0.015779	0.0340666	0.00235763	0.017072	-0.0135774	4.60307	4	0.147287	4.80722	6	0.294574	4.73142	5	0.250277	4.80097	6	0.275748	#NUM!	0		4.66724	9	0.191584	4.80409	12	0.293466	4.70514	10	0.221484	4.76619	11	0.264673	0.0498421	1.3024	0.46896
FT717	FT717	289.944	785.513	PG(16:0/18:0);PG(18:0/16:0);PG(a-13:0/a-21:0)		785.511	785.516	288.258	291.868	22	607;1338;2072;2822;4571;5344;7161;8054;8782;9457;10212;10932;11650;12207;12972;13730;14382;15905;16712;17527;18171;18950		0	0.000834222	0.0320187	0.0153882	0.0215697	-0.0416057	-0.0406901	4.72196	4	0.230343	5.09974	6	0.534884	4.7553	5	0.266888	4.81007	5	0.283499	#NUM!	0		4.73863	9	0.241417	4.9549	11	0.419712	4.91085	10	0.378738	4.78268	10	0.27907	0.0501001	1.30016	0.46896
FT439	FT439	438.601	519.068	Crustinic acid;Methyl 4,6-di-O-galloyl-beta-D-glucopyranosid		519.065	519.068	437.692	439.163	3	1858;2602;3378		0	-0.00798885	0.0215413	-0.0114476	-0.000884771	-0.00051563	0.0105804	4.9294	3	0.385382	4.76122	0	0.254707	4.76122	0	0.272425	4.76122	0	0.251384	#NUM!	0		4.84531	3	0.332226	4.76122	0	0.255814	4.84531	3	0.322259	4.76122	0	0.261351	0.0503669	1.29785	0.46896
FT713	FT713	67.4759	779.523	PA(15:0/24:1(15Z));PA(24:1(15Z)/15:0)		779.519	779.525	66.8356	69.8757	18	601;2064;2817;3611;4562;5335;6253;7156;8048;8778;9450;10926;11647;13723;14377;15113;15899;18169	255.2329;259.2426;279.2313;281.2481;283.2622;301.2166;303.2321;305.2482;329.248;475.2831;493.2914;779.4306;779.5229|718.416913545471;166.721026843481;493.414536092871;1506.04753305399;73.6764456980154;154.872774599971;3913.10676455684;357.162093058486;1925.97660447569;91.7649376551253;216.890087658362;78.7341214583307;29548.9070532766	1	-0.000349811	0.00511838	-0.0566068	-0.068207	-0.0336352	0.0618598	4.9916	6	0.435216	4.69077	5	0.213732	4.66465	4	0.209302	4.49201	2	0.100775	#NUM!	0		4.82812	10	0.322259	4.59139	7	0.14175	4.84119	11	0.318937	4.57833	6	0.143965	0.0505777	1.29604	0.46896
FT067	FT067	373.341	158.989	Propane sulfate		158.989	158.99	371.946	374.956	26	61;841;1552;2285;3054;3852;4854;5582;6551;7421;8303;8981;9686;10434;11143;11853;12419;13203;13941;14631;15327;16138;16978;17758;18385;19182	59.01434;61.01833|80683.4310361278;3864.72741201445	1	-0.0199215	0.00884611	0.00538448	0.00311106	-0.00123619	-0.00281618	5.20633	6	0.580288	5.28515	6	0.65227	5.13616	6	0.586932	5.1886	6	0.59247	#NUM!	0		5.17124	12	0.581395	5.23688	12	0.632337	5.24574	12	0.620155	5.16238	12	0.590255	0.0510749	1.29179	0.46896
FT706	FT706	113.254	774.538	PE(20:2(11Z,14Z)/P-18:1(11Z));PE(20:2(11Z,14Z)/P-18:1(9Z));P		774.537	774.538	112.965	113.775	4	4555;5326;6244;18940		0	-0.015839	-0.0522596	-0.0770121	-0.0639898	-0.0037812	-0.0255669	5.40646	3	0.705426	4.88106	0	0.354374	4.88106	0	0.39258	5.0389	1	0.48948	#NUM!	0		5.14376	3	0.563677	4.95998	1	0.426357	5.14376	3	0.550388	4.95998	1	0.435216	0.0515657	1.28764	0.46896
FT767	FT767	67.2935	820.523	Scytophycin A;Scytophycin D;Scytophycin E		820.521	820.525	64.9414	70.0533	26	648;1373;2115;2859;3660;4619;5384;6311;7212;8100;8814;9491;10251;10968;11684;12235;13015;13772;14422;15155;15948;16756;17573;18213;18999;19679		0	-0.0307714	-0.0240529	-0.0263306	-0.00590537	0.047477	0.0127874	5.37291	6	0.683278	5.19996	6	0.610188	5.20019	6	0.625692	5.29095	6	0.6567	#NUM!	0		5.28655	12	0.6567	5.24545	12	0.637874	5.28644	12	0.651163	5.24557	12	0.640089	0.0518298	1.28542	0.46896
FT878	FT878	240.518	940.594	PS(22:5(7Z,10Z,13Z,16Z,19Z)/24:1(15Z));PS(22:6(4Z,7Z,10Z,13Z		940.592	940.597	235.613	243.178	26	745;1466;2195;2949;3743;4729;5470;6425;7303;8200;8903;9594;10352;11053;11778;12326;13112;13867;14528;15240;16035;16863;17682;18307;19094;19769	135.0308;696.4959;748.5317;766.5499;790.5395;940.5979|9050.98160682702;713.17337517039;472.16084071415;382.2456457008;2123.17246247452;15681.7914319251	1	-0.0161618	-0.0231731	0.0171079	0.00919881	-0.0103785	-0.000213299	4.99938	6	0.440753	5.15581	6	0.569214	5.10517	6	0.561462	5.15247	6	0.570321	#NUM!	0		5.05228	12	0.501661	5.15414	12	0.569214	5.0776	12	0.507198	5.12882	12	0.569214	0.051924	1.28463	0.46896
FT692	FT692	45.2535	771.518	PG(16:0/20:3(5Z,8Z,11Z));PG(16:0/20:3(8Z,11Z,14Z));PG(18:0/1		771.518	771.522	43.9793	45.7871	10	587;4542;5314;6232;12957;14359;15098;16689;18932;19636	152.9956;171.0058;209.0222;227.0339;253.2172;255.2327;256.2354;257.2389;277.2172;278.2218;278.3806;279.2337;280.2365;280.3876;281.2492;282.2531;283.2639;303.2324;304.2372;305.2483;307.2634;391.2259;415.2253;416.2301;417.2412;419.2526;433.2376;435.2501;465.2617;483.2707;489.2625;490.2636;491.2779;493.2903;507.2719;508.2848;509.2893;511.302;515.2759;697.4826;769.1435;770.5099;771.2497;771.5214;772.…	1	0.00396988	-0.1313	-0.134344	0.00873203	0.0953148	-0.046294	5.5421	3	0.767442	4.88106	0	0.354374	5.42868	3	0.748616	5.57077	3	0.780731	#NUM!	0		5.48539	6	0.769657	5.22591	3	0.619048	5.21158	3	0.596899	5.49973	6	0.769657	0.0521273	1.28293	0.46896
FT083	FT083	416.712	173.093	N-Acetylornithine;Glycyl-Valine;Valyl-Glycine		173.089	173.093	414.899	420.009	23	73;852;1566;2298;3068;3867;4865;5595;6566;7434;8315;8993;9697;10447;11156;11861;12433;13215;13951;15343;16990;17768;18399	58.03007;131.0822;136.9366;173.093|2524.893508697;13018.2290160025;1458.39610407473;5500.65430586465	1	-0.0196508	0.0506139	-0.016673	-0.0381735	-0.0677214	0.0249504	5.35149	6	0.667774	5.15812	6	0.573643	5.18346	5	0.614618	4.88444	4	0.356589	#NUM!	0		5.26747	11	0.651163	5.02128	10	0.486157	5.25481	12	0.6268	5.03395	9	0.501661	0.0526221	1.27883	0.46896
FT765	FT765	67.0764	819.519	PG(18:1(11Z)/22:6(4Z,7Z,10Z,13Z,16Z,19Z));PG(18:1(9Z)/22:6(4		819.517	819.521	64.9414	70.0533	26	646;1371;2113;2857;3658;4617;5382;6309;7210;8098;8812;9489;10249;10966;11682;12233;13013;13770;14420;15153;15946;16754;17571;18211;18997;19677	152.9954;277.2169;279.2329;280.2367;281.2483;283.2426;285.2592;303.2322;304.2368;305.248;327.2334;328.2355;329.2488;331.2637;415.2253;463.226;465.2411;489.2607;491.2781;507.2709;509.2878;537.2641;539.2775;555.274;557.2909;745.5604;816.9927;819.5219;820.5252;821.5375|1987.21107968714;3098.00877969843;25193.5729947043;832.289858488284;16797.8299869018;2730.42518119411;1389.13761307066;4770.56908395…	1	-0.032994	-0.0252392	-0.0274173	-0.00568797	0.048595	0.0148165	5.67659	6	0.82835	5.49779	6	0.753045	5.49751	6	0.782946	5.59009	6	0.792913	#NUM!	0		5.58705	12	0.807309	5.54394	12	0.775194	5.58719	12	0.795127	5.5438	12	0.784053	0.052746	1.27781	0.46896
FT695	FT695	45.2876	772.522	PE(O-18:1(1Z)/20:4(5Z,8Z,11Z,14Z));PE(20:3(5Z,8Z,11Z)/P-18:1		772.521	772.525	44.6577	46.5553	9	590;4546;5318;6236;15100;15886;16692;17510;19638		0	-0.00928777	-0.0792245	-0.0629213	-0.0317712	0.112004	-0.0329064	5.36709	3	0.679956	4.88106	0	0.354374	5.03837	1	0.508306	5.58063	4	0.784053	#NUM!	0		5.20273	4	0.607973	5.23084	4	0.624585	5.12408	3	0.539313	5.3095	5	0.684385	0.0529951	1.27576	0.46896
FT882	FT882	240.062	942.609	PE(DiMe(11,5)/DiMe(13,5));PE(DiMe(13,5)/DiMe(11,5));PE(MonoM		942.607	942.612	235.537	243.178	26	749;1469;2198;2953;3747;4733;5472;6429;7306;8204;8906;9598;10354;11056;11781;12327;13116;13870;14531;15243;16039;16867;17686;18309;19098;19773	135.0309;136.033;279.2326;303.2331;698.5147;750.5448;792.5567;942.5391;942.6127;942.695;943.6169|56902.7106799253;506.808826790601;1245.90504946387;1317.15787710257;10572.3724912092;1123.17746177775;13085.3042553786;666.37233888722;98685.2965571587;697.664909490032;897.345551744252	1	-0.00617882	-0.0195645	0.0183473	0.00347416	-0.012331	0.00690338	5.34902	6	0.663344	5.46974	6	0.744186	5.49398	6	0.779623	5.50181	6	0.75526	#NUM!	0		5.4215	12	0.735327	5.48577	12	0.757475	5.40938	12	0.716501	5.4979	12	0.768549	0.0537788	1.26939	0.46896
FT716	FT716	290.696	784.514	PS(16:0/20:3(8Z,11Z,14Z));PS(18:0/18:3(9Z,12Z,15Z));PS(18:1(		784.512	784.516	288.275	292.352	22	606;1337;2070;2821;3616;4569;5343;7160;8052;8781;9455;10211;10931;11649;12206;12971;13729;15904;16711;17526;18170;18949	152.9953;255.2323;277.216;279.233;281.2486;283.2639;391.2255;409.2362;415.2249;417.2411;419.2565;433.2367;435.2517;437.2676;697.4826;784.5154|3477.73362245699;829.709305484505;489.644942117621;5964.00156955383;11245.6559943861;1611.20598160731;824.786850673394;211.173425427341;3911.750614895;9638.58600662616;1385.02420280046;1030.89999379662;3728.35287536994;628.306486903958;37811.0758478195;7675…	1	-0.0158046	0.0454184	0.0197114	0.0257561	-0.0411385	-0.0558546	4.96621	5	0.41196	5.32551	6	0.675526	4.87678	4	0.37763	4.98955	5	0.452935	#NUM!	0		4.9215	9	0.388704	5.15753	11	0.572536	5.14586	11	0.551495	4.93316	9	0.420819	0.054102	1.26679	0.46896
FT685	FT685	45.2535	769.504	PG(16:0/20:4(5Z,8Z,11Z,14Z));PG(16:1(9Z)/20:3(5Z,8Z,11Z));PG		769.503	769.506	43.9793	45.63	8	4537;5313;6224;12951;15093;16683;18926;19631	152.9955;171.0061;209.0224;227.0328;253.2174;255.2328;259.2437;277.2174;278.2211;278.3816;279.2331;280.237;281.2489;282.2523;283.2624;303.233;304.2373;305.2475;306.2516;391.2233;413.2106;415.2263;417.2401;433.2385;439.2284;465.2598;483.2722;487.247;489.2618;491.2766;505.2573;507.2724;509.2876;513.2647;719.5379;767.1381;769.5062;770.5085;771.5196;772.5212;773.5356|4491.86389711673;551.629997921702…	1	-0.0106677	-0.11271	-0.103866	0.00522266	0.0938606	-0.0659553	5.46585	3	0.739756	4.88106	0	0.354374	5.24371	2	0.648948	5.48224	3	0.747508	#NUM!	0		5.35478	5	0.696567	5.18165	3	0.595792	5.17346	3	0.574751	5.36298	5	0.707641	0.0547634	1.26151	0.46896
FT697	FT697	114.395	772.522	PE(O-18:1(1Z)/20:4(5Z,8Z,11Z,14Z));PE(20:3(5Z,8Z,11Z)/P-18:1		772.521	772.523	113.372	114.71	5	4548;5320;6237;12959;18934		0	-0.0261742	-0.0552967	-0.0925394	-0.0391936	0.00929586	-0.0284285	5.42153	3	0.710963	4.88106	0	0.354374	5.0342	1	0.504983	5.05083	1	0.500554	#NUM!	0		5.22787	4	0.625692	4.96595	1	0.436323	5.1513	3	0.554817	5.04252	2	0.511628	0.0556042	1.25489	0.46896
FT787	FT787	66.0929	843.519	PG(22:6(4Z,7Z,10Z,13Z,16Z,19Z)/20:3(5Z,8Z,11Z));PG(22:6(4Z,7		843.518	843.521	64.1575	67.6219	24	671;1397;2135;2879;3680;4643;5404;6338;7232;8127;8836;9510;10273;10989;11704;13036;13798;14445;15169;16777;17600;18236;19023;19696	152.9953;259.2436;283.2434;285.2577;301.2165;303.2326;305.2483;327.2338;329.2484;331.2645;439.2224;513.2613;539.2778;769.5612;840.9166;843.4263;843.5205;843.5959;844.5188|289.303553607087;239.237564639581;340.034062198913;635.322341297766;890.035395547372;8493.2210733978;2190.03781422469;1129.9624227933;8191.69025787061;1458.91817401687;185.251189011115;286.082201831641;465.28000512842;1408.21766…	1	-0.0376357	-0.0204728	-0.0301553	0.00204024	0.0475463	0.01778	5.26719	6	0.619048	5.08673	6	0.526024	5.06539	5	0.529347	5.05423	5	0.502769	#NUM!	0		5.16629	11	0.574751	5.07048	11	0.51938	5.17696	12	0.575858	5.05981	10	0.522702	0.0557386	1.25384	0.46896
FT735	FT735	68.1225	795.519	PG(16:0/22:5(4Z,7Z,10Z,13Z,16Z));PG(16:0/22:5(7Z,10Z,13Z,16Z		795.517	795.521	65.4935	70.0533	24	622;1349;2087;2833;3631;4586;5355;6274;7179;8069;8793;9468;10224;11661;12988;13742;14394;15131;15918;16729;17543;18185;18965;19658	152.9954;253.2175;255.2323;259.2422;277.2174;279.2328;280.2367;281.2483;282.2517;283.2622;301.2181;303.233;304.2359;305.2482;307.2642;329.2478;331.2639;415.2272;417.241;439.2252;441.2391;491.2768;509.2869;513.2624;515.2802;531.2735;793.0611;794.5058;795.5205;796.528;797.5326|1741.72954832039;1154.29750766129;1514.94938629322;1213.01772837258;519.079633264275;13061.3691635799;1076.91538783362;3047…	1	-0.0360764	-0.0303673	-0.0272947	-0.00204316	0.0499003	0.0643584	5.76531	6	0.860465	5.47116	5	0.746401	5.54539	5	0.803987	5.6698	6	0.82835	#NUM!	0		5.65535	11	0.838317	5.57048	11	0.785161	5.61824	11	0.810631	5.60759	11	0.820598	0.0558286	1.25314	0.46896
FT782	FT782	247.728	838.556	PS(14:0/24:1(15Z));PS(14:1(9Z)/24:0);PS(16:0/22:1(13Z))		838.538	838.56	242.587	255.751	13	1392;2873;6330;8119;8831;10267;10982;13791;14438;16769;17593;19016;19692	135.0306;253.2186;255.2339;277.2181;279.2338;301.2167;303.2325;480.3094;702.5287;751.5318;764.5269;766.541;778.5791;838.4284;838.5597|1401.82613045108;312.351829792513;591.769680070389;555.288973471568;894.923969320487;1400.19359645189;948.591587726617;243.537092769202;240.983879815144;293.862871156261;13780.9636152058;170.145458439038;197.315366913426;582.590131929862;10157.082015213	1	-0.0432505	-0.0122017	0.0778172	-0.0357245	0.0330228	-0.0487391	4.31892	2	0.0232558	4.86905	4	0.333333	4.41426	2	0.0487265	4.65738	4	0.191584	#NUM!	0		4.36659	4	0.0243632	4.76321	8	0.259136	4.59399	6	0.125138	4.53582	6	0.117386	0.0565821	1.24732	0.470806
FT865	FT865	243.01	916.595	PS(20:3(5Z,8Z,11Z)/24:1(15Z));PS(20:3(8Z,11Z,14Z)/24:1(15Z))		916.593	916.597	239.539	245.418	26	733;1456;2184;2939;3735;4718;5457;6411;7293;8189;8892;9578;10341;11041;11765;12309;13100;13858;14513;15226;16024;16850;17670;18296;19083;19757	92.02521;135.031;255.2319;279.233;303.2328;672.4986;766.5407;842.5687;916.5973;916.6786;917.6019|1948.01891052209;139559.780288309;643.997558159664;863.73959550217;3793.75909596975;2382.13987480585;26897.2368337443;1606.27456139172;212228.84336975;672.467121741505;1983.97913335257	1	-0.00741433	-0.0165312	0.0142556	0.0114228	-0.0113857	0.0196374	5.7449	6	0.851606	5.86108	6	0.891473	5.84562	6	0.895903	5.87907	6	0.893688	#NUM!	0		5.79526	12	0.874862	5.87008	12	0.894795	5.80299	12	0.875969	5.86235	12	0.89258	0.0584703	1.23306	0.474707
FT351	FT351	42.3106	436.153	trans-erioaustralasine hydrate;Pazopanib;Rupatadine		436.151	436.154	39.9609	43.7066	19	1056;3296;4147;6829;7701;9193;9914;10663;11377;12660;13439;14135;14851;15588;16387;17220;17952;18633;19396		0	-0.00715314	-0.0262248	0.045066	0.0482452	0.0178644	0.00801515	4.61605	2	0.156146	4.85392	5	0.323367	4.9023	5	0.414175	5.0116	6	0.473976	#NUM!	0		4.75917	7	0.258029	4.93276	11	0.397564	4.73499	7	0.243632	4.95695	11	0.433001	0.0590787	1.22857	0.474707
FT803	FT803	290.855	849.531	PI(16:0/13-HODE);PI(16:0/9-HODE)		849.525	849.532	290.717	291.034	3	7243;9521;10286		0	-0.00117984	0.01106	0.0155648	0.0106925	-0.00321848	-0.0101816	4.29266	0	0.0155039	4.49839	3	0.0808416	4.29266	0	0.0199336	4.29266	0	0.021041	#NUM!	0		4.29266	0	0.0155039	4.39552	3	0.0454042	4.39552	3	0.0365449	4.29266	0	0.0177187	0.0590812	1.22855	0.474707
FT732	FT732	67.7974	793.504	PG(16:0/22:6(4Z,7Z,10Z,13Z,16Z,19Z));PG(16:1(9Z)/22:5(4Z,7Z,		793.502	793.506	65.4935	70.0533	20	618;2083;2830;3627;4582;5352;6270;7174;8065;8790;10221;11658;12984;14391;15127;16725;17539;18181;18961;19655	152.9954;205.1945;253.2176;255.2329;256.2358;257.2278;259.2425;277.2171;279.2328;280.2367;281.2479;301.2172;303.2331;305.2484;327.2328;329.249;331.2651;415.2255;437.2101;439.2238;489.2616;507.2744;511.2437;513.262;531.273;718.5461;719.5434;791.0634;793.5055;794.5075;795.5238|1175.2676361204;116.973660402698;1211.34188527377;1531.20357021325;277.375020771925;600.377911868262;895.955055223826;2674.…	1	-0.0343803	-0.0358888	-0.0453565	0.00526339	0.0747972	0.0414484	5.63181	6	0.808416	5.30974	4	0.668882	5.31063	4	0.692137	5.44577	5	0.732004	#NUM!	0		5.47122	10	0.766334	5.37776	9	0.707641	5.47078	10	0.745293	5.3782	9	0.715393	0.0595376	1.22521	0.474707
FT880	FT880	240.29	941.598			941.596	941.6	235.613	244.558	24	747;1467;2951;3745;4731;5471;6427;7304;8202;8905;9596;10353;11054;11779;13114;13868;14530;15241;16037;16865;17684;18308;19096;19771		0	-0.0248447	-0.0316845	0.0215288	0.0120332	-0.00368564	0.0110364	4.71466	5	0.227021	4.92028	6	0.399779	4.82942	5	0.341085	4.92193	6	0.395349	#NUM!	0		4.77204	10	0.275748	4.92111	12	0.38206	4.81747	11	0.297896	4.87567	11	0.362126	0.0597421	1.22372	0.474707
FT514	FT514	279.585	597.304	1-Oleoylglycerophosphoinositol;Phosphatidylinositol lyso 18;		597.303	597.305	277.296	282.496	6	9312;10045;10784;12114;14953;17354	152.9954;238.998;283.2642;313.0319;419.2558;437.2673;479.2786;519.2712;561.3803;579.2948;597.3058|2840.1083502283;356.379733485676;2479.73819121914;111.708632909836;604.454646805607;2192.83343307507;442.474042468638;523.069808953483;585.085732864314;382.274679055627;12675.078284288	1	0.00986486	0.00168961	0.0253698	0.0190334	0.0511874	-0.0370686	4.55879	0	0.121816	4.82484	3	0.300111	4.70556	2	0.24031	4.70012	1	0.213732	#NUM!	0		4.63218	2	0.169435	4.76248	4	0.256921	4.69181	3	0.204873	4.70284	3	0.225914	0.0608263	1.21591	0.479007
FT169	FT169	373.341	256.966	MMV069458		256.965	256.967	372.148	374.956	24	143;919;1653;2371;3147;3957;4935;5675;6654;7519;8373;9062;9766;10517;11228;12505;13284;14017;15421;16225;17063;17827;18476;19255	59.01433;61.01877;156.9908;158.9887|41496.5339089318;869.56923833046;1262.76878343207;1290.94829781144	1	-0.0332487	0.0167944	0.00478931	0.00174307	-0.00537047	-0.00185044	4.9664	6	0.413068	5.06247	6	0.51052	4.79523	4	0.306755	4.94328	6	0.413068	#NUM!	0		4.88081	10	0.354374	5.00287	12	0.467331	5.01443	12	0.458472	4.86926	10	0.355482	0.0615022	1.21111	0.480043
FT281	FT281	476.517	341.108	STD_D-Trehalose;STD_Melibiose;STD_Sucrose	+	341.108	341.109	475.43	479.205	22	240;1005;1733;2463;3238;4070;5015;5790;6761;7629;8460;9149;9863;10611;11318;12599;13382;14095;15523;17153;17906;18571	59.01417;71.01412;78.95908;89.02435;96.96961;119.0342;160.9615;161.0452;179.0559;341.1102|1392.04482126835;267.747930104234;437.611552493006;906.169185770855;282.133391579702;357.748082483557;707.762697405499;359.493720016663;1018.53023522268;831.824271370306	1	-0.048302	0.0315051	-0.0229496	-0.0590327	-0.0290849	0.0772597	5.14558	6	0.540421	4.88923	6	0.3732	4.78797	4	0.300111	4.624	4	0.178295	#NUM!	0		4.96678	10	0.433001	4.75662	10	0.251384	5.01741	12	0.461794	4.70599	8	0.227021	0.0631448	1.19966	0.488507
FT066	FT066	373.494	157.994			157.993	157.994	372.653	374.956	25	60;840;1551;2284;3053;3851;4853;5581;6550;7419;8302;8980;9685;10433;11142;12418;13202;13940;14630;15326;16137;16977;17757;18384;19180		0	-0.0256181	0.00756638	0.00306289	0.00617551	-0.000493048	0.00485093	4.94369	6	0.397564	5.02128	6	0.473976	4.84751	5	0.356589	4.91431	6	0.384275	#NUM!	0		4.8956	11	0.367663	4.96779	12	0.438538	4.98248	12	0.435216	4.88091	11	0.365449	0.0636942	1.1959	0.488507
FT540	FT540	400.737	620.023	ADP-ribose 1"-2" cyclic phosphate		620.02	620.024	399.277	401.962	24	454;1204;1936;2688;4370;5195;6062;7007;7894;8655;9326;10068;10801;11519;12818;13593;14248;14973;15755;16548;17376;18059;18804;19524		0	-0.00660086	-0.00155733	0.004602	0.010943	0.00758328	0.015276	4.87314	5	0.342193	5.02331	6	0.477298	4.91049	5	0.420819	4.95157	6	0.425249	#NUM!	0		4.89181	10	0.366556	4.98744	12	0.459579	4.94822	11	0.409745	4.93103	11	0.418605	0.0646357	1.18953	0.491454
FT461	FT461	400.746	537.016	Trisjuglone		537.014	537.017	399.244	401.962	26	390;1145;1876;2621;3396;4280;5140;5977;6928;7806;8596;9274;10007;10750;11461;12088;12757;13528;14199;14917;15685;16489;17312;18014;18733;19471	59.01417;127.001;141.0166;209.0042;223.0197;291.0074;305.023;373.0103;387.0255;455.0136;469.0292|9416.26834212306;64367.5075641597;103383.907140368;26099.161920411;23943.5039650666;48090.5271535066;25471.3590195638;32965.089494227;10161.6191157484;5609.14091476069;557.894757924896	1	0.0130678	0.0118538	0.00856745	0.0015126	0.000418253	-0.00526212	5.65021	6	0.816168	5.73656	6	0.857143	5.73878	6	0.870432	5.68124	6	0.834994	#NUM!	0		5.69449	12	0.848283	5.7089	12	0.842746	5.69338	12	0.841639	5.71001	12	0.852713	0.0657876	1.18186	0.492051
FT166	FT166	373.313	254.968	Phosphoramide mustard;Isophosphamide mustard;Pyrrolnitrin		254.967	254.969	370.645	374.956	26	140;916;1649;2368;3144;3952;4932;5671;6651;7516;8370;9057;9763;10513;11225;11915;12501;13281;14014;14706;15417;16221;17059;17824;18472;19251	58.83907;59.01448;156.9904;255.2329|931.553742149159;381509.554595937;22240.454380147;2371.89549870242	1	-0.0241179	0.00960259	0.00562908	0.00063082	-0.00289999	-0.00861728	5.76808	6	0.86268	5.85836	6	0.890365	5.66987	6	0.844961	5.73621	6	0.847176	#NUM!	0		5.71897	12	0.854928	5.79728	12	0.877076	5.81322	12	0.878184	5.70304	12	0.849391	0.0658299	1.18158	0.492051
FT349	FT349	102.092	433.144	Melleolide K;MLS000876973-01!5-chloro-9-(3-hydroxy-2-methylb		433.142	433.15	99.5013	106.541	17	292;1054;4145;5859;6826;7699;9191;9911;10660;12657;14849;15587;16385;17218;17950;18630;19394	78.91869;80.91658;433.2718|1559.17108505648;5476.64165590535;2483.02693943575	1	-0.0318869	-0.0279775	0.0257319	0.0317964	0.0342329	-0.0526264	4.46055	2	0.0697674	4.71079	5	0.227021	4.46359	2	0.076412	4.87482	6	0.337763	#NUM!	0		4.46207	4	0.0631229	4.79281	11	0.281285	4.58567	7	0.121816	4.66921	8	0.202658	0.0664565	1.17746	0.49256
FT704	FT704	45.3909	774.536	PE(20:2(11Z,14Z)/P-18:1(11Z));PE(20:2(11Z,14Z)/P-18:1(9Z));P		774.535	774.552	44.6577	50.3739	16	595;2059;4554;5325;6243;9444;11642;12199;12965;14368;15106;15892;16699;17517;18941;19643		0	0.0792018	-0.0717491	-0.172014	0.0319613	0.150888	0.00702235	5.15884	4	0.547065	4.26568	1	0.0121816	5.35807	5	0.714286	5.23277	5	0.621262	#NUM!	0		5.25845	9	0.642303	4.74923	6	0.243632	4.71226	5	0.224806	5.29542	10	0.675526	0.0672524	1.17229	0.494305
FT807	FT807	288.733	856.507	PS(18:0/22:6(4Z,7Z,10Z,13Z,16Z,19Z));PS(20:3(8Z,11Z,14Z)/20:		856.506	856.51	286.69	290.282	23	686;1410;2147;2893;3695;4660;5416;6358;7247;8139;8847;9525;10290;11000;13054;13810;14461;15983;16795;17618;18251;19039;19711		0	-0.0295687	0.00586226	0.0143389	-0.00113853	-0.00388707	0.00106341	4.91138	6	0.370986	5.03078	6	0.487265	4.73739	3	0.255814	4.97616	6	0.439646	#NUM!	0		4.82439	9	0.318937	5.00347	12	0.468439	4.97108	12	0.423034	4.85678	9	0.3433	0.0686206	1.16355	0.500193
FT063	FT063	373.418	156.991	Diethyl disulfide;2,3-Butanedithiol;1,2-Bis(methylthio)ethan		156.991	156.992	371.946	374.956	26	57;837;1548;2281;3050;3848;4850;5578;6547;7416;8299;8977;9683;10430;11139;11850;12415;13200;13937;14627;15323;16134;16974;17754;18381;19177	58.83898;59.01465|3855.02797447079;994044.755141817	1	-0.0206824	0.00890518	0.00467811	0.00337743	-0.0011164	-0.00219811	6.30074	6	0.96567	6.37269	6	0.972315	6.22333	6	0.964563	6.27838	6	0.964563	#NUM!	0		6.26204	12	0.96567	6.32554	12	0.971207	6.33672	12	0.967885	6.25086	12	0.964563	0.0699516	1.1552	0.505716
FT197	FT197	268.996	281.036	Floxuridine;5'-Deoxy-5-fluorouridine;Bikojic acid		281.035	281.036	267.433	272.956	15	169;1679;2397;3170;3985;4955;5703;6684;7549;9787;11253;11941;13310;15445;18498	243.0626;281.2497|617.409597342845;280.951267109219	0.85	0.000897595	0.000655086	-0.0139146	-0.0499437	-0.0566898	-0.00507558	4.70543	6	0.218162	4.49894	3	0.0819491	4.57817	3	0.152824	4.4373	2	0.0730897	#NUM!	0		4.6418	9	0.177187	4.46812	5	0.0775194	4.60218	9	0.129568	4.50774	5	0.0952381	0.0747829	1.1262	0.536248
FT744	FT744	290.855	805.489	PI(16:0/16:2(9Z,12Z));PI(16:1(9Z)/16:1(9Z));PI(16:2(9Z,12Z)/		805.486	805.492	288.506	292.911	17	631;2839;3640;4597;5363;6287;7191;8079;8798;9473;10231;10948;13751;14402;15927;16737;18977	152.9958;223.0008;227.2016;241.0118;251.2015;253.2168;279.2331;297.0389;363.1933;389.2089;391.2243;525.2471;551.2653;577.2807;718.5128;787.5115;805.4893;805.5403;807.5033|146.648221574566;176.000331768347;405.633499149057;994.787506791269;128.089954849418;940.404787390275;584.620255097352;144.364762028366;449.754554487356;354.031190447785;169.841797432912;483.948114557643;644.687825164613;184.062…	1	-0.0280364	0.00387253	0.00170301	-0.00510198	-0.0538551	-0.00628154	4.73364	5	0.243632	4.92437	6	0.400886	4.57608	2	0.150609	4.65617	3	0.190476	#NUM!	0		4.65486	7	0.186047	4.79027	9	0.27907	4.829	11	0.30454	4.61612	5	0.168328	0.0763496	1.11719	0.53707
FT884	FT884	240.062	943.613	PC(DiMe(11,3)/MonoMe(13,5));PC(DiMe(11,5)/MonoMe(11,5));PC(D		943.611	943.615	235.537	243.178	26	751;1470;2200;2955;3749;4735;5473;6431;7308;8206;8907;9600;10355;11058;11782;12328;13118;13872;14532;15244;16041;16868;17687;18310;19100;19774		0	-0.00473828	-0.0191449	0.0173987	0.00220437	-0.0128131	0.00716076	5.09937	6	0.498339	5.20873	6	0.61794	5.2475	6	0.651163	5.25091	6	0.632337	#NUM!	0		5.17344	12	0.584718	5.22982	12	0.621262	5.15405	12	0.559247	5.24921	12	0.644518	0.0768666	1.11426	0.53707
FT159	FT159	119.452	243.044	Pidotimod;5-Chlorodivaricatinic acid;(R)-2-Benzylsuccinate		243.044	243.045	113.202	124.494	14	908;1639;2362;3134;3943;4924;6641;9754;10506;11218;12494;13275;15409;18464	79.95707;80.96503;124.0067;135.056;161.0716;243.0436|450.156407956574;15571.9255094294;506.387457444045;488.189307031951;580.151392093262;1942.27731793539	1	-0.0484294	0.016488	-0.0370767	0.0188658	-0.100884	0.045859	5.58438	5	0.785161	5.18748	3	0.601329	5.30083	3	0.682171	5.15192	2	0.569214	#NUM!	0		5.44261	8	0.744186	5.1697	5	0.584718	5.38593	8	0.708749	5.22638	5	0.629014	0.0772125	1.11231	0.53707
FT302	FT302	373.541	354.943			354.942	354.944	371.946	374.956	26	253;1017;1745;2477;3254;4087;5025;5806;6775;7645;8476;9160;9879;10623;11333;12001;12614;13393;14103;14811;15539;16343;17171;17920;18587;19356	59.01432;61.01836;156.9907;158.989|121209.448195475;1593.36956413501;54746.4599943346;27882.8473110674	1	-0.0317937	0.00780946	0.00682043	0.00174818	-0.00332128	-0.00545286	5.68848	6	0.834994	5.78227	6	0.875969	5.55716	6	0.809524	5.655	6	0.822813	#NUM!	0		5.62282	12	0.825028	5.71863	12	0.846069	5.73537	12	0.856035	5.60608	12	0.819491	0.0773332	1.11163	0.53707
FT493	FT493	407.263	566.043	{[6-({2-[3,5-dihydroxy-4-(sulfooxy)phenyl]-7-hydroxy-5-oxo-5		566.041	566.044	405.894	408.396	16	414;1165;4310;6951;7836;8617;10765;12104;12778;13549;14939;15709;16509;17333;18755;19493	88.04006;127.0009;141.0163;156.0273;170.0429;209.0041;238.0312;252.046;291.0083;320.035;334.0493;402.0369;416.0547|285.416487967526;1037.2628918588;1528.6976057379;1280.97008304787;3572.87431648546;273.836104366694;507.837438614165;809.589704644804;559.361413561942;1169.7994550164;979.087369224811;1037.6800061829;303.933356438586	1	-0.0237635	-0.0320887	0.040676	0.00816456	4.09654e-05	-0.0430825	4.43506	1	0.0542636	4.6992	4	0.218162	4.68709	4	0.227021	4.76095	5	0.250277	#NUM!	0		4.56108	5	0.117386	4.73008	9	0.227021	4.56713	5	0.110742	4.72402	9	0.23588	0.0808023	1.09258	0.549311
FT538	FT538	400.518	619.02			619.018	619.021	399.244	401.962	26	452;1202;1934;2686;3470;4367;5193;6058;7005;7892;8653;9324;10066;10799;11517;12123;12816;13591;14246;14971;15753;16546;17374;18057;18802;19522	59.01409;127.0009;141.0166;209.0042;223.0198;291.0074;305.023;373.01;387.0256;455.0137;469.0292;537.0167;551.0317;619.0191|2949.00090001417;30219.591512814;59591.6056555009;13283.8131741068;15852.2955945449;38916.019886263;29277.6324232028;30825.6787381265;14874.4789497392;21438.1357698647;5941.9094114557;5696.00867596597;458.467182128538;1987.34479776491	1	0.0133891	0.0144677	0.00667573	0.00189529	0.000217454	-0.00600933	5.67055	6	0.827243	5.75563	6	0.864895	5.75281	6	0.874862	5.68724	6	0.838317	#NUM!	0		5.71168	12	0.853821	5.72144	12	0.849391	5.71309	12	0.851606	5.72003	12	0.856035	0.0808224	1.09247	0.549311
FT545	FT545	234.593	630.364	Jurubine;Hydroxydestruxin B		630.362	630.365	229.253	236.354	16	462;1209;4379;6069;7014;7902;8660;10074;10806;11523;12823;13598;16553;17383;18062;18811	135.0308;255.2327;480.3084;630.3644|18604.0386632258;567.335480220281;1217.22245957362;3402.75385213064	1	-0.0435562	-0.0390054	0.0430449	0.0196044	-0.0245107	-0.0237394	4.86328	2	0.331118	5.15893	5	0.575858	4.95063	3	0.45072	5.1081	4	0.541528	#NUM!	0		4.90696	5	0.376523	5.13352	9	0.559247	5.01111	7	0.456257	5.02937	7	0.498339	0.0809643	1.09171	0.549311
FT323	FT323	407.927	402.036	dehydrofelodipine;Tetraphyllin B sulfate		402.035	402.037	407.237	408.757	14	1036;4113;5834;6800;7669;8493;9895;10642;11352;13415;14831;15563;17191;18608	88.04015;127.0011;141.0157;156.0274;170.0428|1132.38850698411;565.5917024224;332.729885527566;960.771737403738;1521.14268944807	1	-0.0246191	-0.0311254	0.0361503	-0.0262634	-0.00324307	0.00393026	4.32436	2	0.0254707	4.53229	5	0.10299	4.43316	3	0.0642303	4.40092	3	0.0642303	#NUM!	0		4.37876	5	0.0299003	4.4666	8	0.076412	4.42833	7	0.047619	4.41704	6	0.0531561	0.0842192	1.07459	0.567033
FT210	FT210	418.678	287.062	Benzo[a]pyrene;Pterosin J;Aminobenzoyl-glutamate		287.058	287.063	409.661	421.913	24	179;949;1688;2407;3181;3997;4962;5713;6699;7561;8401;9799;10555;11263;12538;13322;14044;14742;15457;16265;17094;17851;18511;19285		0	-0.0287068	-0.00568409	-0.0245453	-0.0283372	-0.00552918	0.0473839	5.04551	6	0.465116	4.84555	5	0.315615	4.83186	5	0.3433	4.83088	6	0.303433	#NUM!	0		4.93869	11	0.400886	4.83821	11	0.310078	4.94553	11	0.405316	4.83137	11	0.314507	0.0866099	1.06243	0.57456
FT799	FT799	274.101	847.646	SM(d18:1/24:1(15Z));Sphingomyelin d18;Campesterol 6'-(9Z-oct		847.644	847.648	271.913	279.13	24	681;1405;2142;2889;3689;4655;5410;6351;8136;8841;9519;10284;11713;12260;13047;13808;14455;15180;15977;16789;17611;18243;19033;19705	144.8695;168.0432;761.4701;773.6462;795.6401;796.6438;797.4458;797.6561;797.7241;798.6604;847.5004;847.6468|1027.2732776982;1059.19119160761;938.510759689007;824.222157444774;18850.8980375388;525.117238639064;1956.11075948459;109335.493920042;395.293848686777;344.968896766136;9181.01801208538;25478.0494288158	1	0.025396	-0.0261351	-0.0365992	-0.0294066	0.028928	0.0296998	5.29905	6	0.635659	5.03412	4	0.48948	5.34466	6	0.708749	5.2273	6	0.613511	#NUM!	0		5.32186	12	0.676633	5.13071	10	0.557032	5.16659	10	0.570321	5.28598	12	0.663344	0.08664	1.06228	0.57456
FT885	FT885	240.111	944.624	PS(22:4(7Z,10Z,13Z,16Z)/24:0);PS(24:0/22:4(7Z,10Z,13Z,16Z))		944.619	944.626	235.613	243.178	26	752;1471;2201;2956;3750;4736;5474;6432;7309;8207;8908;9601;10356;11059;11783;12329;13119;13873;14533;15245;16042;16869;17688;18311;19102;19775	135.031;136.0335;281.2485;303.2334;700.5293;766.5404;794.5701;944.6264|20694.5345158202;413.040206154704;878.144988944797;591.876395429017;7660.74569940474;351.944947409311;4765.37168133896;39170.6032688274	1	0.00855877	-0.0179114	0.0179607	-0.00371175	-0.0117602	0.00623705	5.40326	6	0.700997	5.50398	6	0.757475	5.59673	6	0.818383	5.55706	6	0.775194	#NUM!	0		5.49999	12	0.772979	5.53052	12	0.771872	5.45362	12	0.738649	5.57689	12	0.799557	0.0900728	1.04541	0.588445
FT624	FT624	69.725	732.526	N-[(4E,8Z)-1,3-dihydroxyoctadeca-4,8-dien-2-yl]hexadecanamid		732.525	732.527	68.8332	71.2021	16	534;1274;2004;4469;5262;6160;7980;8722;11583;12158;12899;13661;14304;15039;15835;18116		0	0.0298937	-0.0230727	-0.0599947	-0.0681572	-0.0478074	0.0606016	4.77661	4	0.27464	4.39414	2	0.0431894	4.76096	6	0.271318	4.4552	2	0.0852713	#NUM!	0		4.76879	10	0.271318	4.42467	4	0.0564784	4.58537	6	0.120709	4.60808	8	0.161683	0.0907094	1.04235	0.588445
FT294	FT294	373.541	352.945	Pipobroman		352.944	352.946	371.946	374.956	26	248;1012;1741;2473;3250;4080;5021;5802;6770;7639;8470;9156;9872;10618;11327;11997;12608;13389;14100;14804;15533;16337;17164;17914;18580;19350	58.83902;59.01443;156.9907|609.482970615318;259829.665279398;160144.487341888	1	-0.033657	0.00740517	0.00708637	0.00111792	-0.00358062	-0.00514389	6.33284	6	0.967885	6.4271	6	0.976744	6.19479	6	0.959025	6.29586	6	0.966777	#NUM!	0		6.26382	12	0.966777	6.36148	12	0.973422	6.37997	12	0.971207	6.24533	12	0.963455	0.0909139	1.04137	0.588445
FT667	FT667	278.213	761.582	DG(20:4(5Z,8Z,11Z,14Z)/24:1(15Z)/0:0);DG(20:4(8Z,11Z,14Z,17Z		761.578	761.584	275.893	281.586	26	567;1308;2039;2790;3580;4520;5298;6209;7127;8018;8752;9427;10176;10904;11616;12181;12938;13693;14340;15077;15869;16668;17486;18142;18910;19616	78.95897;168.0426;255.2328;256.2363;392.2273;674.4853;685.4268;687.5464;702.5106;761.472;761.521;761.5824|333.694295200645;5562.32325886298;507.151764488651;313.985041728984;500.174940514603;3639.89078182674;868.37593177238;236033.63544452;1996.45116050382;315.932449314505;6743.61841833373;30751.2479883595	1	0.00523983	-0.00269982	0.0106225	0.000503029	0.01571	0.00627036	5.47463	6	0.744186	5.52993	6	0.774086	5.56876	6	0.815061	5.55244	6	0.770764	#NUM!	0		5.5217	12	0.781838	5.54118	12	0.774086	5.50228	12	0.761905	5.5606	12	0.791805	0.0914208	1.03895	0.588445
FT763	FT763	67.0688	818.507	Scytophycin B;Scytophycin B;PC(15:0/12-HETE)		818.505	818.51	64.9414	68.6968	23	644;1369;2111;2855;3656;4615;5380;6307;7208;8096;9487;10247;10964;11680;13011;13768;14418;15151;16752;17568;18209;18994;19675		0	-0.0433017	-0.0329397	-0.040502	0.00774717	0.0453997	-0.0142747	5.08998	6	0.495017	4.8474	5	0.317829	4.86417	5	0.367663	4.91977	5	0.392027	#NUM!	0		4.97707	11	0.442968	4.88358	10	0.348837	4.96869	11	0.420819	4.89197	10	0.389812	0.0927406	1.03273	0.588445
FT567	FT567	248.237	672.497	PE(14:0/P-18:1(11Z));PE(14:0/P-18:1(9Z));PE(14:1(9Z)/P-18:0)		672.495	672.498	245.597	251.259	22	484;1228;1959;2714;3504;4403;5214;6090;7038;9351;10096;11541;12844;13618;14263;14992;15784;16572;17405;18078;18833;19547	227.2022;253.2169;281.2485;390.2389;408.2509;418.2696;436.2823;672.4981|293.440821361747;7772.40503766389;7702.71660008543;286.038481617675;765.148408394975;382.219026475116;895.606646310671;23577.6265803176	1	-0.00760358	-0.0175634	-0.0175881	0.0280014	0.0120706	0.0363174	4.83216	6	0.30897	4.60206	3	0.143965	4.75581	5	0.267996	4.87211	6	0.336656	#NUM!	0		4.79398	11	0.293466	4.73708	9	0.233666	4.71711	9	0.232558	4.81396	11	0.303433	0.0929256	1.03186	0.588445
FT107	FT107	53.5846	199.17	STD_Lauric acid;Ethyl decanoate;2-Heptyl butyrate	+	199.145	199.171	46.0167	56.3725	20	91;1596;2319;3091;3895;4887;5620;6587;9011;10466;11178;11878;12456;13236;13971;14658;16171;17013;17784;19209	156.139;199.1702|4817.49337844251;3303.14377002675	1	0.0481445	0.0348449	-0.0593826	-0.0127333	-0.0289247	-0.0328394	5.14442	6	0.538206	4.79734	3	0.285714	5.0796	6	0.543743	4.69258	4	0.207087	#NUM!	0		5.11201	12	0.54485	4.74496	7	0.241417	4.97088	9	0.421927	4.88609	10	0.380952	0.0942582	1.02568	0.588445
FT299	FT299	373.529	353.948			353.947	353.949	371.946	374.956	26	251;1015;1744;2475;3253;4084;5023;5804;6773;7643;8473;9159;9876;10621;11331;11999;12612;13391;14102;14808;15536;16340;17168;17918;18584;19354		0	-0.0315761	0.00820678	0.00602335	0.001499	-0.00390684	-0.00532235	5.27441	6	0.625692	5.36413	6	0.69546	5.14185	6	0.591362	5.23628	6	0.62237	#NUM!	0		5.20813	12	0.611296	5.3002	12	0.673311	5.31927	12	0.675526	5.18907	12	0.603544	0.0943974	1.02504	0.588445
FT761	FT761	66.9113	817.503	PG(18:2(9Z,12Z)/22:6(4Z,7Z,10Z,13Z,16Z,19Z));PG(18:3(6Z,9Z,1		817.502	817.506	64.9414	68.6968	25	642;1367;2109;2853;3654;4613;5378;6305;7206;8095;8809;9485;10245;10962;11678;13009;13766;14416;15149;15943;16750;17566;18207;18992;19673	152.9955;259.2435;277.2168;279.2328;280.2354;283.2426;301.2164;303.2329;305.2489;327.2327;329.2483;439.2229;463.2269;513.2629;537.2622;743.5434;743.6053;814.9858;817.5055;817.5802;818.5093;819.5196|908.697596141323;637.96794180754;3591.97419303121;16879.5013955998;221.255939155219;2459.10673611436;583.697692827198;14337.4852064985;1256.81053933477;8027.75633198253;3626.12913570608;343.59836756178…	1	-0.0433917	-0.0279632	-0.0308523	0.000100251	0.0467991	0.00394398	5.3842	6	0.687708	5.21616	6	0.62237	5.14627	5	0.598007	5.26473	6	0.645626	#NUM!	0		5.26524	11	0.650055	5.24045	12	0.635659	5.30018	12	0.654485	5.2055	11	0.614618	0.0948031	1.02318	0.588445
FT093	FT093	311.208	186.046	chondroitin sulfate E (GalNAc4,6diS-GlcA), precursor 5a		186.045	186.046	309.794	312.266	26	82;861;1582;2309;3079;3880;4876;5606;6576;7447;8322;9000;9704;10456;11166;11869;12443;13223;13961;14649;15355;16159;17002;17777;18407;19201	114.024;186.0457|1444.44652869351;606.665166898895	1	0.0039464	0.00442634	0.0144415	0.0171966	0.000718996	0.00522051	5.04883	6	0.467331	5.13223	6	0.55814	5.17313	6	0.605759	5.15825	6	0.573643	#NUM!	0		5.11098	12	0.541528	5.14524	12	0.565891	5.09053	12	0.518272	5.16569	12	0.594684	0.0954055	1.02043	0.588445
FT647	FT647	239.819	746.515	STD_15:0-18:1 PS (1-Pentadecanoyl-2-(9Z-octadecenoyl)-glycer		746.513	746.562	233.088	253.235	18	1292;4499;5279;6187;7110;8002;8736;9416;9417;12170;13676;14321;15061;15853;15854;16648;18130;19604	140.0113;196.0381;229.1955;257.228;259.2429;281.2479;282.2522;283.2433;301.2169;303.2329;305.2473;327.2335;329.2478;418.2735;436.2825;442.273;444.2883;460.2832;462.2986;744.2158;746.516;748.5321|127.005504477931;312.353890563725;156.33692220176;661.137449418385;873.817325717576;302.12672016396;422.88322032756;2777.65395120154;3857.95233198369;15981.794481609;234.839270415102;6753.61650096494;515.…	1	0.0756374	-0.0208664	0.118078	-0.108853	-0.0655559	0.011024	4.52472	3	0.101883	5.10518	4	0.539313	5.09721	4	0.55814	5.02063	4	0.481728	#NUM!	0		4.81096	7	0.30897	5.0629	8	0.513843	4.81495	7	0.294574	5.05892	8	0.521595	0.0965988	1.01503	0.589581
FT897	FT897	559.324	1239.62	NCGC00386005-01_C60H100O24_;NCGC00386005-01_C60H100O24_;Chik		1239.62	1239.62	558.083	561.216	14	774;1481;2216;2979;3771;4780;6475;7340;8241;13884;16065;16897;17699;19117	1228.865;1234.871;1235.126;1235.367;1235.617;1235.867;1239.376;1239.624;1239.784;1239.876;1239.971;1240.129;1240.372;1240.633|35.4132274022504;91.7071862418652;171.105848608806;119.342110041362;113.928987907855;54.7505632471484;1327.73326983314;3220.86478110241;40.0163329942188;2980.09781994884;47.4303861791668;1610.75982253647;710.584266927515;88.9551611114257	1	-0.0760069	-0.0050215	-0.00554624	-0.037396	-0.0273269	-0.0273928	5.49109	5	0.75526	5.1258	2	0.554817	4.95167	1	0.451827	5.29869	4	0.666667	#NUM!	0		5.22138	6	0.61794	5.21225	6	0.611296	5.30844	7	0.665559	5.12518	5	0.565891	0.097167	1.01248	0.589581
FT441	FT441	322.297	520.267	STD_Taurochenodeoxycholic acid;STD_Taurodeoxycholic acid;STD		520.266	520.268	320.691	324.82	23	372;1129;1859;2604;3379;4258;5125;5957;6909;7787;8582;9260;9989;10734;11449;13512;14903;15667;16469;17297;18005;18715;19456	78.95895;152.9955;171.0055;279.233;433.2353;520.2673|2903.50577249313;43608.0097789287;929.686753222083;1457.73791693696;39566.2713527778;17206.0317239485	1	-0.0244358	-0.00889795	0.0196005	-0.00252474	-0.00572748	0.00106494	4.83095	6	0.305648	4.93141	6	0.40753	4.64734	3	0.193798	4.92761	6	0.398671	#NUM!	0		4.73914	9	0.242525	4.92951	12	0.392027	4.88118	12	0.349945	4.78748	9	0.284607	0.097595	1.01057	0.589581
FT747	FT747	290.674	806.494	PS(16:0/20:3(8Z,11Z,14Z));PS(18:0/18:3(9Z,12Z,15Z));PS(18:1(		806.492	806.497	288.506	291.693	11	2841;4599;5365;7194;8081;9474;10233;10951;14404;15929;16738		0	-0.00943455	0.00521694	-0.0109249	0.0061031	-0.0370022	-0.0177891	4.49389	3	0.0841639	4.73212	5	0.241417	4.37406	1	0.0365449	4.45834	2	0.0863787	#NUM!	0		4.43397	4	0.0498339	4.59523	7	0.145072	4.613	8	0.14175	4.4162	3	0.0520487	0.0995428	1.00199	0.594184
FT696	FT696	69.5604	772.522	PE(O-18:1(1Z)/20:4(5Z,8Z,11Z,14Z));PE(20:3(5Z,8Z,11Z)/P-18:1		772.521	772.525	66.2496	72.7666	24	591;1328;2055;2811;3601;4547;5319;6238;7145;8040;8770;9440;10197;11638;12960;13714;14363;15101;15887;16693;17509;18163;18935;19639		0	-0.031001	-0.0314692	-0.0158933	0.00260449	0.0812595	0.041622	5.6851	6	0.83278	5.44952	5	0.730897	5.47872	5	0.776301	5.75722	6	0.851606	#NUM!	0		5.58191	11	0.803987	5.60337	11	0.803987	5.56731	11	0.786268	5.61797	11	0.82835	0.0997043	1.00129	0.594184
FT092	FT092	363.792	181.071	STD_D-Mannitol ;STD_D-Sorbitol;STD_Dulcitol	+	181.071	181.072	362.535	364.979	16	81;859;1577;2306;3078;3878;4872;5604;6573;7444;10453;11164;12442;13221;15351;17000	59.014;71.01377|917.201048121736;497.482428729334	1	-0.0394252	0.0107283	-0.0184012	-0.021971	-0.0382568	0.0159935	4.68909	6	0.204873	4.49603	3	0.0786268	4.47061	3	0.0830565	4.38121	2	0.0564784	#NUM!	0		4.57985	9	0.133998	4.43862	5	0.0631229	4.59256	9	0.124031	4.42591	5	0.0586932	0.101679	0.992769	0.599564
FT296	FT296	175.353	353.233	NCGC00384809-01!5-[5-hydroxy-3-(hydroxymethyl)pentyl]-8a-(hy	+	353.232	353.234	170.301	185.284	18	250;1014;4081;6771;7641;9158;9874;10620;11330;12610;13390;14805;15535;16339;17166;17916;18581;19352	165.1279;171.1024;181.1233;191.1445;193.1232;193.1594;209.118;217.1234;229.1959;235.134;247.2067;255.2119;263.2017;273.1853;273.2229;281.2126;291.1966;299.202;309.2072;317.2121;335.2227;353.2008;353.2335|2210.00263655717;1808.05300836541;781.562547191625;311.632576621741;5923.69194972514;1846.66656900065;1766.21999273278;377.825555250033;406.136553965801;472.250353628928;4404.32915710649;846.4877…	1	-0.0405015	-0.0644627	0.0603252	0.038822	-0.00585587	-0.0224123	4.83852	1	0.314507	5.17864	5	0.590255	5.15984	4	0.600221	5.42815	6	0.72536	#NUM!	0		4.99918	5	0.461794	5.3034	11	0.675526	5.00858	6	0.454042	5.294	10	0.673311	0.103102	0.986733	0.599564
FT648	FT648	117.863	746.507	PE(18:2(9Z,12Z)/P-18:1(11Z));PE(18:2(9Z,12Z)/P-18:1(9Z));PE(		746.505	746.508	113.237	124.337	15	552;1291;2021;3568;4497;5278;6186;10160;10890;12921;14322;15059;16646;17471;18894		0	-0.0463604	-0.0883963	-0.191801	0.0943667	0.0491206	-0.0967881	5.96968	5	0.914729	5.29826	2	0.663344	5.55239	3	0.806202	5.62451	3	0.813953	#NUM!	0		5.76104	8	0.866002	5.46138	5	0.749723	5.63397	7	0.818383	5.58845	6	0.809524	0.103272	0.986015	0.599564
FT149	FT149	212.932	240.018	Ornidazole;Ornidazole;L-Oxalylalbizziine		240.018	240.018	212.138	213.538	4	1634;2356;4918;9042	61.98855;79.95728;80.96482;106.9802;121.9915;124.0071;136.0073;152.0008;179.9979;207.9906;240.0176|393.046038916252;972.450760375962;201.36822022936;129.521028199211;289.870409970647;2605.83811476859;377.329494218961;100.676352066051;174.499606273284;332.055880979051;247.368284927791	1	0.00245647	0.0369365	-0.0428615	-0.00482015	-0.00759557	0.0167732	4.91293	3	0.372093	4.61393	1	0.150609	4.56376	0	0.140642	4.56376	0	0.135105	#NUM!	0		4.73834	3	0.24031	4.58885	1	0.138427	4.76343	4	0.254707	4.56376	0	0.131783	0.103326	0.98579	0.599564
FT283	FT283	38.4151	341.201	2,3-Dinor-6-keto-prostaglandin F1 a;2,3-Dinor-TXB2;(-)-11-Hy		341.198	341.205	37.3485	39.5671	13	2465;3240;4071;5016;5791;7631;9864;11993;14096;15524;17154;17907;19342		0	0.0148365	0.00520808	-0.0196892	-0.0980143	0.022027	-0.00606301	5.23933	5	0.602436	4.91696	2	0.397564	4.92552	2	0.434109	5.00515	4	0.467331	#NUM!	0		5.08242	7	0.527132	4.96105	6	0.428571	5.07814	7	0.509413	4.96534	6	0.44629	0.105417	0.977088	0.606305
FT590	FT590	71.0758	703.492	DG(18:0/22:6(4Z,7Z,10Z,13Z,16Z,19Z)/0:0);DG(18:1(11Z)/22:5(4		703.491	703.493	69.701	73.5874	15	504;1245;1977;4431;5230;6124;7057;7952;8698;11556;12867;13635;14276;15010;15804	227.2021;253.2167;255.2332;281.2484;465.2615;467.277;703.493|344.726958887655;12340.6910362457;6658.52683051929;998.620543950676;267.232795322323;690.30378312228;34225.2454074145	1	-0.000353429	-0.0354082	-0.0663683	-0.0604891	-0.0540829	0.0682231	4.84449	4	0.316722	4.48459	3	0.0741971	4.74225	5	0.258029	4.44861	1	0.0808416	#NUM!	0		4.79337	9	0.292359	4.4666	4	0.0753045	4.66454	7	0.183832	4.59543	6	0.156146	0.107092	0.970243	0.606305
FT224	FT224	441.99	298.069	D-4'-Phosphopantothenate;Avenanthramide 1c;(Z)-N-Coumaroyl-5		298.066	298.07	440.107	443.89	23	189;959;1695;4009;4973;5726;6707;7573;8411;9104;9809;10563;11272;12549;13331;14052;14750;15469;16276;17102;17860;18519;19295	78.95913;96.96942;124.0066;208.038;280.0585;298.0697|123749.321354494;45731.8342605416;807.62575916153;862.917208733513;1994.88934937686;94333.8027888318	1	-0.0237708	-0.0808289	0.0311376	0.0252326	0.0109244	0.0217207	5.0192	4	0.454042	5.36451	6	0.696567	5.34315	5	0.704319	5.56452	6	0.777409	#NUM!	0		5.18117	9	0.591362	5.46451	12	0.751938	5.19185	10	0.586932	5.45383	11	0.748616	0.107147	0.97002	0.606305
FT603	FT603	400.198	718.046	Surugatoxin		718.043	718.05	399.415	403.327	17	517;1257;1990;2747;3539;4447;5242;6138;7072;10129;10855;12882;13644;15818;16604;18861;19574		0	-0.036893	0.0102204	-0.0321171	0.0222858	-0.0343419	-0.0222649	4.71002	6	0.222591	4.49707	3	0.0797342	4.42954	2	0.0586932	4.53202	4	0.119601	#NUM!	0		4.56978	8	0.125138	4.51455	7	0.0985604	4.60354	9	0.130676	4.48078	6	0.0863787	0.107238	0.969653	0.606305
FT350	FT350	42.38	435.151	Rivastigmine tartrate (Exelon);Conchacarpine A;Albanin B		435.15	435.155	39.9609	44.0603	23	1784;2522;3295;4146;5061;5860;6828;7700;8511;9192;9913;10662;11376;12033;12659;13438;14134;14850;16386;17219;17951;18632;19395	219.0512;266.963;268.9444;277.0386;286.9745;291.0904;293.0704;335.0265;351.0573;359.0114;359.1533;375.0434;375.1844;403.0872;416.9797;417.1403;418.9737;419.1195;435.0088;435.1514;435.2461;435.2886;435.3461;435.383;435.4186|6396.86858764038;689.578901884363;492.868116836394;1534.43417494733;580.424116800612;16428.1714421947;742.924985912504;3631.48489753069;24413.7834341921;2940.4171932681;24382.8…	1	0.0130887	-0.0102227	0.011429	0.0285356	0.0337054	0.0122478	5.26782	6	0.620155	5.34842	6	0.6866	5.37324	6	0.722038	5.35316	5	0.693245	#NUM!	0		5.32053	12	0.674419	5.35079	11	0.69103	5.30812	12	0.662237	5.3632	11	0.708749	0.108408	0.964937	0.60902
FT132	FT132	47.5186	225.124	Pentobarbital;Amobarbital;2,4-Di-tert-butylphenol		225.122	225.126	45.2955	48.4341	26	112;891;1618;2344;3115;3922;4907;5644;6615;7488;8348;9026;9734;10485;11202;11897;12477;13256;13992;14682;15390;16191;17032;17802;18441;19227	59.01412;85.00432;94.06579;122.0966;138.1288;181.5665;182.1188;208.9761;224.4382;225.0083;225.1248;225.8851|1466.30797744831;6027.41377967575;523.093987308046;1312.76904345293;14676.1447697482;573.983901888941;154266.438892033;2544.58098152678;1455.61787281408;903.94557027724;435024.636485061;745.545353347477	1	0.0134844	0.0142638	-0.0576844	-0.0291759	-0.0378453	0.0581803	6.75174	6	0.99557	6.45044	6	0.977852	6.58413	6	0.986711	6.35037	6	0.975637	#NUM!	0		6.66794	12	0.990033	6.4004	12	0.976744	6.60109	12	0.983389	6.46725	12	0.978959	0.109122	0.962086	0.609152
FT268	FT268	44.6739	329.248	Docosapentaenoic acid (22n-6);Docosapentaenoic acid (22n-3);		329.246	329.25	43.5978	45.7195	24	231;994;2453;3227;4051;5774;6748;7613;8450;9137;9850;10599;11308;11986;12589;13370;14086;14789;15511;16318;17141;17896;18557;19330	59.0142;161.072;231.2116;251.2014;257.2276;269.2484;283.2642;285.2586;311.2371;327.2345;328.2408;329.2491|1351.62750103138;620.930004542984;2041.08525340932;1059.41028035946;564.598748362786;1200.40456751968;4061.30995833264;13146.572772699;1315.24395138337;442.01130210073;465.059044330252;136714.800197386	1	-0.00887421	-0.0193168	0.0602818	0.0172484	0.0716735	0.020684	5.39016	4	0.692137	5.70398	6	0.842746	5.74597	6	0.872647	5.84952	6	0.884828	#NUM!	0		5.56807	10	0.799557	5.77675	12	0.870432	5.54707	10	0.778516	5.79775	12	0.881506	0.110568	0.956369	0.613341
FT371	FT371	373.541	452.92			452.919	452.921	371.946	374.956	26	308;1073;1799;2539;3315;4167;5076;5883;6850;7721;8530;9209;9931;10678;11395;12042;12679;13456;14146;14865;15605;16407;17236;17968;18651;19414	59.01438;61.01831;156.5152;156.9908;157.9935;158.9892;254.968;256.9664;354.9434|113059.065351504;842.169526034322;532.566701207521;226598.218764762;2179.54602443259;75507.998390737;8109.9798931571;7997.0837781153;2451.7384616769	1	-0.0347946	0.00663916	0.00691907	-0.000105054	-0.00331142	-0.00511412	5.6551	6	0.818383	5.74453	6	0.861573	5.51039	6	0.788483	5.61389	6	0.801772	#NUM!	0		5.58274	12	0.805094	5.67921	12	0.829457	5.69982	12	0.846069	5.56214	12	0.792913	0.114892	0.93971	0.628161
FT254	FT254	103.324	315.196	(1R,2R,4aR,8aS)-1-[2-(furan-3-yl)ethyl]-2,4a,5-trimethyl-2,3	+	315.196	315.197	101.402	109.255	16	219;4036;6733;7600;8439;9835;11297;12576;13358;14775;15499;16306;17129;17887;18545;19319	255.2329;271.2065|1267.93133098426;1781.72796583557	1	-0.0161279	-0.0395359	0.050697	0.0220767	0.0414185	0.023507	4.46661	1	0.0741971	4.67094	4	0.202658	4.67185	4	0.217054	4.92165	6	0.394241	#NUM!	0		4.56923	5	0.124031	4.79629	10	0.286822	4.56877	5	0.111849	4.79675	10	0.294574	0.115084	0.938986	0.628161
FT848	FT848	237.274	900.599	Halovir A		900.598	900.602	231.785	240.19	24	721;1447;2927;3728;4708;5446;6394;7284;8177;8880;10326;11033;11753;12297;13089;13849;14498;15214;16013;16837;17657;18284;19073;19744	135.0309;303.2332;722.5177;750.5463;764.5289;900.533;900.6021;900.6769|10769.833936242;735.664662744003;692.429707403221;2101.05701906228;1284.89161672775;1511.12718299457;14447.2595036538;237.488804118016	1	-0.000877582	-0.0418169	0.0442877	0.0148032	0.00257384	0.00712231	4.77624	5	0.273533	4.99863	5	0.458472	5.11741	6	0.571429	5.23717	6	0.623477	#NUM!	0		4.94682	11	0.413068	5.1179	11	0.547065	4.88743	10	0.355482	5.17729	12	0.598007	0.115677	0.936753	0.628161
FT013	FT013	332.235	89.0248	STD_Lactic acid;Glyceraldehyde;Glyceraldehyde	+	89.0246	89.0249	329.948	333.732	26	11;794;1498;2239;3000;3797;4800;5532;6493;7360;8258;8931;9641;10388;11091;11809;12366;13159;13895;14581;15276;16083;16924;17715;18336;19131	89.02421|193.743888159103	1	0.00654071	0.00943564	0.013995	0.019404	-0.00661083	-0.00324947	5.48273	6	0.748616	5.58149	6	0.795127	5.6178	6	0.82835	5.57186	6	0.781838	#NUM!	0		5.55027	12	0.78959	5.57667	12	0.791805	5.53211	12	0.774086	5.59483	12	0.813953	0.116089	0.93521	0.628161
FT173	FT173	416.527	259.091	2-(2-phenylcyclobutyl)phenol;3-(2-phenylcyclobutyl)phenol;4-		259.091	259.092	414.899	420.319	12	149;923;3962;6660;7525;9067;10523;12510;15426;16231;18479;19260	74.02478;118.0509;140.0329;215.0645;259.0907|28787.1468055673;46819.8162490831;1473.38199469986;476.338972100898;3857.05891698465	0.964286	-0.0601161	-0.0315819	0.0184932	0.0633709	-0.0439685	-0.088994	4.5084	1	0.0930233	4.89319	4	0.37763	4.53746	1	0.124031	4.98406	4	0.449612	#NUM!	0		4.52293	2	0.0930233	4.93863	8	0.405316	4.7008	5	0.217054	4.76076	5	0.260244	0.117389	0.930374	0.631322
FT886	FT886	240.062	945.628			945.623	945.63	235.613	243.178	26	753;1472;2202;2957;3751;4737;5475;6433;7310;8208;8909;9603;10357;11060;11784;12330;13120;13874;14534;15246;16043;16870;17689;18312;19103;19776		0	0.0103554	-0.0170867	0.0172042	-0.00476281	-0.0116011	0.00635324	5.14058	6	0.530454	5.23083	6	0.630122	5.32904	6	0.697674	5.29249	6	0.658915	#NUM!	0		5.23481	12	0.630122	5.26166	12	0.651163	5.18571	12	0.58361	5.31076	12	0.685493	0.120325	0.919642	0.634651
FT555	FT555	406.672	648.046			648.044	648.047	405.146	407.622	16	473;6079;7026;7915;10085;10816;11532;12833;13607;14984;15773;16564;17396;18072;18823;19538	127.0004;141.0166;156.0282;170.0428;209.0042;223.0207;238.0308;252.0465;291.0057;305.0231;320.0344;334.0483;373.0088;402.0362;416.0522;484.0402;566.0419|284.534148225184;612.478133617927;382.153923122587;1356.47345770186;133.875474560591;123.205263054774;87.020412247864;252.376716306709;271.421152306954;129.383453167691;535.889751347813;466.71914717935;170.718012417512;491.199370995616;333.982980…	1	-0.0195537	-0.0407094	0.0313054	0.0107664	0.0101577	-0.00639204	4.51393	1	0.0974529	4.71866	4	0.231451	4.73556	4	0.252492	4.8064	6	0.27907	#NUM!	0		4.62474	5	0.163898	4.76253	10	0.258029	4.6163	5	0.142857	4.77098	10	0.27021	0.12102	0.917142	0.634651
FT170	FT170	79.4989	257.084	3-phenyl-1-(2,4,6-trihydroxyphenyl)propan-1-one;ONONETIN;Dex	+	257.084	257.085	77.5158	81.3091	23	144;920;1655;2372;3148;3958;4936;5676;6655;7520;8374;9768;10519;11230;11919;12506;13285;14018;14709;15422;16227;17828;19257	169.0402;181.077;182.0701;209.0727;214.0418;237.0781;257.0843|866.500791406553;681.771812747941;406.660653229835;666.444291749102;640.038675866373;4038.57656301394;13218.691289733	1	-0.00693099	0.00296078	-0.0361755	-0.0289602	-0.0649343	0.0414931	4.99067	6	0.433001	4.77481	5	0.264673	4.97582	6	0.472868	4.58785	4	0.149502	#NUM!	0		4.98325	12	0.449612	4.68133	9	0.20155	4.88274	11	0.351052	4.78183	10	0.277962	0.121458	0.915573	0.634651
FT045	FT045	242.902	136.033			136.033	136.034	239.622	247.073	26	38;820;1528;2265;3030;3830;4831;5559;6526;7395;8285;8960;9669;10413;11121;11837;12396;13186;13920;14610;15302;16115;16956;17740;18365;19160		0	-0.0145989	-0.0373997	0.0209552	0.0116576	-0.0222331	0.00956392	5.54718	6	0.768549	5.70234	6	0.841639	5.68691	6	0.853821	5.77383	6	0.859358	#NUM!	0		5.61705	12	0.822813	5.73809	12	0.856035	5.62476	12	0.813953	5.73037	12	0.86268	0.121558	0.915215	0.634651
FT367	FT367	373.541	450.922	Fipronil sulfone		450.92	450.923	371.946	374.956	26	304;1069;1795;2534;3310;4163;5072;5878;6845;7717;8525;9206;9926;10675;11390;12040;12674;13452;14142;14861;15601;16401;17232;17964;18646;19411	59.01435;124.0068;125.0092;156.5145;156.9908;254.9681;352.9449|178176.176790187;2555.37046201786;993.0124396079;1552.06299609179;466006.005378966;23800.423198826;4856.03714750291	1	-0.0365974	0.00672244	0.00761254	-0.000596387	-0.00350834	-0.00547913	6.16651	6	0.940199	6.2589	6	0.957918	6.01157	6	0.930233	6.12453	6	0.940199	#NUM!	0		6.08904	12	0.942414	6.19172	12	0.949059	6.2127	12	0.951274	6.06805	12	0.937984	0.121605	0.915047	0.634651
FT251	FT251	39.4758	313.168	Lotusine;Oblongine;NCGC00160256-01!Sparteine-15-carboxylic a		313.162	313.171	38.3028	40.4447	14	217;2442;3212;4034;4996;5755;7598;8438;11976;14076;15497;17127;17886;19317		0	0.0206546	0.0140705	-0.0267761	-0.126256	0.0340306	0.00414453	5.35314	5	0.671096	4.99339	2	0.456257	4.992	2	0.48505	5.06913	4	0.512735	#NUM!	0		5.17257	7	0.582503	5.03126	6	0.491694	5.17327	7	0.572536	5.03057	6	0.500554	0.122787	0.910847	0.637049
FT369	FT369	373.342	451.925			451.923	451.928	372.653	374.956	25	306;1071;1797;2536;3312;4165;5074;5880;6847;7719;8527;9207;9928;10676;11393;12676;13454;14144;14863;15603;16403;17234;17966;18648;19412		0	-0.0375286	0.00575253	0.00740187	0.00148061	-0.0043825	-4.15083e-06	5.23897	6	0.600221	5.3257	6	0.676633	5.09456	5	0.557032	5.18912	6	0.593577	#NUM!	0		5.16677	11	0.576966	5.25741	12	0.647841	5.28233	12	0.648948	5.14184	11	0.581395	0.126972	0.89629	0.654911
FT801	FT801	274.419	848.649	PC(22:0/P-18:1(11Z));PC(22:0/P-18:1(9Z));PC(22:1(13Z)/P-18:0		848.524	848.651	271.931	289.454	15	682;2890;4656;5411;6352;9520;10285;11714;12261;13048;14456;15181;15978;16790;18244		0	0.0393933	-0.0349532	-0.0635829	-0.0227037	0.00761999	0.023068	4.91606	4	0.375415	4.63115	2	0.172757	4.99257	5	0.486157	4.76043	3	0.249169	#NUM!	0		4.95432	9	0.419712	4.69579	5	0.212625	4.77361	6	0.261351	4.8765	8	0.363234	0.128289	0.891812	0.654977
FT096	FT096	311.285	187.042	STD_Xylitol;STD_L-Arabitol;Isoplumbagin		187.042	187.043	309.899	312.89	26	85;862;1584;2311;3081;3882;4878;5608;6577;7450;8324;9002;9705;10459;11167;11872;12444;13225;13962;14650;15357;16160;17004;17781;18409;19203	71.01396;114.0243;115.0207;143.0518;187.042|5857.27602920373;1003.21846759036;242580.395776978;1218.331480307;137518.263314816	1	0.00391631	0.00458088	0.0149543	0.0165509	0.000588181	0.00575039	5.64739	6	0.813953	5.72548	6	0.852713	5.76726	6	0.881506	5.75815	6	0.852713	#NUM!	0		5.70732	12	0.852713	5.74181	12	0.857143	5.68644	12	0.836102	5.7627	12	0.872647	0.131546	0.880923	0.654977
FT652	FT652	238.157	748.529	PE(20:4(5Z,8Z,11Z,14Z)/P-18:1(11Z));PE(20:4(5Z,8Z,11Z,14Z)/P		748.528	748.531	231.785	241.484	23	554;1295;2024;2778;3570;6191;7114;8005;8738;9419;10164;10894;11604;12172;13678;14325;15064;15856;16653;17474;18132;18898;19607	140.0114;196.0378;205.196;231.211;239.2369;257.2273;259.2429;265.254;285.2248;285.2586;301.2166;302.2215;302.3056;303.2333;304.2354;305.2459;327.2335;328.2359;329.2484;331.2645;401.2472;418.2716;436.2826;444.2878;460.2857;461.286;462.2985;464.3139;746.2198;748.5312;748.6042;749.5318;750.5436|1120.13919573743;1911.8429273767;1204.90692359985;508.61539108339;274.744274147633;697.025666512164;7578.6…	1	0.0191406	-0.0162681	0.102072	-0.00925417	0.00865224	-0.0136763	5.67777	4	0.829457	6.10818	6	0.942414	6.04556	5	0.940199	6.27777	6	0.963455	#NUM!	0		5.86167	9	0.894795	6.19298	12	0.950166	5.89298	10	0.893688	6.16167	11	0.949059	0.131549	0.880914	0.654977
FT669	FT669	278.213	762.585			762.583	762.586	275.893	281.586	26	570;1311;2040;2792;3583;4523;5300;6210;7130;8021;8754;9428;10179;10907;11619;12183;12941;13696;14342;15079;15871;16671;17489;18145;18913;19618		0	0.00533542	-0.0019836	0.0106484	-0.00062356	0.0163244	0.00588722	5.13545	6	0.527132	5.18675	6	0.600221	5.23358	6	0.640089	5.20606	6	0.603544	#NUM!	0		5.18452	12	0.594684	5.1964	12	0.602436	5.1611	12	0.566999	5.21982	12	0.624585	0.134073	0.872658	0.654977
FT373	FT373	434.061	454.099	Fenvalerate;Prazosin HCl;Luteolinidin 3-O-glucoside		454.093	454.104	431.909	435.107	17	311;1075;1802;2541;3318;4171;5078;5887;7725;8532;9934;11397;12681;13458;14148;15607;17238		0	-0.0253109	0.000373062	-0.033216	-0.061781	-0.0149777	0.0739569	4.77515	6	0.271318	4.53919	3	0.109635	4.64502	4	0.190476	4.37834	2	0.0542636	#NUM!	0		4.71008	10	0.223699	4.45877	5	0.0719823	4.65717	9	0.178295	4.51168	6	0.0974529	0.135857	0.866917	0.654977
FT693	FT693	69.5604	771.519	PG(16:0/20:3(5Z,8Z,11Z));PG(16:0/20:3(8Z,11Z,14Z));PG(18:0/1		771.517	771.522	66.2496	72.7666	24	588;1326;2053;2808;3599;4543;5315;6234;7144;8038;8769;9439;10196;11636;12956;13712;14360;15097;15885;16690;17508;18161;18933;19637	152.9957;253.2158;255.232;277.2169;278.2215;278.3787;279.2332;280.2361;281.2487;282.2521;283.2618;305.2482;307.2665;415.2254;417.2409;435.2529;489.2625;491.2769;507.2728;509.2884;769.1369;771.5204;772.521;773.5336|2707.52234940169;167.450781927141;847.305021918946;1259.85556405388;643.353963618864;255.635988185156;65042.4950962511;2345.96178661063;64453.2718468648;960.092810497417;863.10019207356…	1	-0.0433948	-0.0389356	-0.0156838	0.0028523	0.0912055	0.071259	6.03449	6	0.92691	5.73783	5	0.859358	5.76695	5	0.880399	6.10988	6	0.936877	#NUM!	0		5.90072	11	0.902547	5.92386	11	0.904762	5.88616	11	0.89258	5.93841	11	0.912514	0.136159	0.865954	0.654977
FT098	FT098	38.156	188.01	Taurocyamine;3-Aminosalicylic acid;Aminosalicylic Acid		188.009	188.011	36.2029	41.0903	14	86;1585;2312;3083;3884;4880;5610;6580;7451;9004;11170;15359;17006;19205		0	-0.0306888	0.0451887	-0.0167471	-0.0188605	0.0191443	0.0302519	4.76874	6	0.265781	4.51176	3	0.0930233	4.3046	1	0.0232558	4.50339	3	0.105205	#NUM!	0		4.53667	7	0.0996678	4.50757	6	0.0974529	4.64025	9	0.169435	4.40399	4	0.0465116	0.137176	0.862723	0.654977
FT135	FT135	133.589	227.067	2-Deoxyuridine;3-Deoxyuridine;Deoxyuridine	+	227.067	227.068	129.059	144.984	23	115;893;1619;2346;3120;3925;4910;5647;6618;7490;8352;9028;9737;10486;11206;11898;13994;14685;15392;16194;17037;18444;19231	184.0613;227.2004|668.332409689405;370.950567075219	0.952381	0.00154347	0.0170861	0.0188494	-0.00299695	0.0179246	-0.0338948	5.16697	6	0.555925	5.28534	6	0.653378	5.05125	4	0.518272	5.22763	5	0.615725	#NUM!	0		5.10911	10	0.539313	5.25649	11	0.645626	5.22616	12	0.607973	5.13944	9	0.578073	0.137346	0.862185	0.654977
FT546	FT546	105.233	632.367			632.366	632.369	99.7698	108.727	13	464;6070;7017;7905;10075;11524;12127;14978;15762;17386;18064;18813;19529	111.0195;506.3241;632.3668|2060.54009346988;191.322751537109;671.078739704978	1	0.0135083	-0.0281538	0.0571479	-0.00520349	0.011432	-0.00465441	4.33289	1	0.0265781	4.53333	3	0.105205	4.53951	3	0.127353	4.73533	5	0.23588	#NUM!	0		4.4362	4	0.0520487	4.63433	8	0.166113	4.43311	4	0.0498339	4.63742	8	0.183832	0.137474	0.86178	0.654977
FT052	FT052	60.9899	143.108	STD_M088REF_Valproic acid;STD_Caprylic acid;Hexyl acetate	+	143.107	143.108	60.127	62.0122	23	44;826;1536;2271;3037;3836;4839;5565;6534;7402;8291;8968;10421;11128;11842;12402;13928;14615;15309;16121;16964;17746;19166	143.1075|1515.81889354576	1	0.0252264	0.0201692	-0.0350317	-0.00465246	0.0191138	0.0298175	5.07115	6	0.481728	4.89822	5	0.380952	5.01989	5	0.498339	4.93463	5	0.406423	#NUM!	0		5.04552	11	0.496124	4.91643	10	0.375415	4.98469	11	0.438538	4.97726	10	0.456257	0.13752	0.861633	0.654977
FT504	FT504	286.046	578.309	LysoPC(20:4(5Z,8Z,11Z,14Z));LysoPC(20:4(8Z,11Z,14Z,17Z));Pho		578.304	578.315	283.809	289	21	424;1175;1906;2656;5168;6016;6962;7849;8627;9302;10036;10775;11490;12108;12788;15719;16518;17342;18037;18765;19501	224.0684;242.0801;259.2427;279.2325;283.2638;303.2324;504.3089;526.2929;528.3091;578.3035;578.3499|1185.17171251353;464.985061377017;733.075933333106;5341.74594834051;642.074274083194;13190.6191994906;5059.1648633669;264.584743764499;23570.2415304841;3489.32388689454;743.681166818175	1	0.0165244	0.033965	0.0208188	0.0212318	0.00966111	-0.0397875	4.73904	4	0.250277	4.9495	6	0.425249	4.76207	3	0.27464	4.95132	6	0.424142	#NUM!	0		4.75055	7	0.250277	4.95041	12	0.414175	4.84427	10	0.321152	4.8567	9	0.342193	0.138311	0.859143	0.654977
FT044	FT044	242.902	135.032	Allopurinol;Hypoxanthine;Allopurinol	+	135.031	135.032	238.412	247.073	26	36;818;1526;2263;3028;3828;4830;5558;6525;7393;8284;8959;9667;10412;11120;11836;12394;13185;13919;14609;15301;16114;16955;17739;18364;19159	50.00399;64.00689;64.82192;65.01492;65.99915;66.0099;68.02549;78.00976;80.02528;90.00973;91.74918;92.02584;93.00907;105.0201;106.0281;107.036;108.0201;133.0152;134.6228;135.0314|941.664866804223;24512.2394061029;469.364438532488;201796.552088838;891.759066005157;94823.8126273116;6086.34621718097;1173.56108979711;641.318337757219;852.066542986539;1669.45065359545;465094.71225833;2602.77170031069;5…	1	-0.0164099	-0.0405338	0.021671	0.0117062	-0.0231974	0.00992271	6.72266	6	0.992248	6.88223	6	0.997785	6.86208	6	1	6.96031	6	0.998893	#NUM!	0		6.79237	12	0.996678	6.92127	12	0.998893	6.80244	12	0.99557	6.9112	12	1	0.140159	0.853378	0.654977
FT086	FT086	87.21	178.844			178.844	178.844	85.6162	88.7025	17	76;1572;2302;3073;3872;4868;5599;7439;8996;11864;12437;13955;15346;16155;16994;17773;19196	59.01416;71.01388;78.91848;99.92536;178.8435|4205.07189480315;612.94090735175;541.265942836318;7572.79527842459;10225.7127425856	1	0.0128609	0.037762	-0.0362496	-0.00825752	0.0417749	-0.024374	4.79401	6	0.286822	4.56172	2	0.122924	4.63136	3	0.184939	4.73919	5	0.24031	#NUM!	0		4.71269	9	0.224806	4.65046	7	0.180509	4.67787	8	0.193798	4.68528	8	0.212625	0.142473	0.846266	0.654977
FT746	FT746	515.408	806.235			806.233	806.236	511.9	518.678	23	632;1357;2096;2840;3642;4598;5364;6288;7193;8080;8799;10232;10950;11668;12998;13753;14403;15140;15928;17554;18196;18979;19663	140.0113;161.0451;179.0558;221.0667;281.0882;341.1087;383.1193;425.13;503.1615;545.1728;587.1833;665.2169;806.2358;806.4188|6653.77537305244;3835.4847331939;4995.49561379815;910.387798836425;1190.40654560545;8195.93379452247;5536.8067667018;2745.26398463888;3870.03813089346;14014.4962873046;3005.85450210498;1169.22441375583;93644.1152364347;845.084169956601	1	-0.0262552	0.00793859	-0.00214914	-0.0292295	0.00370497	0.107018	5.10448	6	0.500554	4.85074	5	0.321152	4.96653	5	0.468439	4.88398	5	0.355482	#NUM!	0		5.0355	11	0.486157	4.86736	10	0.322259	4.97761	11	0.428571	4.92525	10	0.415282	0.142774	0.845349	0.654977
FT802	FT802	274.089	849.651	SM(d18:0/24:1(15Z)(OH));SM(d18:0/24:1(15Z));Sphingomyelin d1		849.649	849.654	271.931	279.13	17	683;2891;4657;5412;6353;9522;10287;11715;12262;13049;14457;15182;15979;16791;17612;18245;19706	168.0427;391.2223;671.466;761.4848;763.4606;790.5717;795.1989;796.6444;797.6544;798.6564;799.457;799.4871;799.6676;800.0649;800.6805;821.5244;831.4918;831.5103;848.6625;849.4472;849.4879;849.5199;849.5945;849.6502;850.5004;850.529|255.181197233634;63.2744115348714;271.22610949034;41.8148652552645;41.8696121117591;56.8088148017068;37.9829111956269;61.7782621754941;15081.9110967336;386.99899860901;…	1	0.0414626	-0.0385731	-0.0530634	-0.0178362	0.0381405	0.0192409	4.96221	4	0.408638	4.6899	2	0.212625	5.04755	5	0.516058	4.94784	5	0.418605	#NUM!	0		5.00488	9	0.466224	4.81887	7	0.300111	4.82605	6	0.302326	4.99769	10	0.473976	0.143148	0.844216	0.654977
FT131	FT131	370.618	223.982	Lanthionine ketimine;2-aminophenol sulphate		223.981	223.982	369.527	371.986	15	111;890;1617;2343;3113;3920;5643;6613;7486;11200;12475;14680;15389;16190;17031	79.95737;81.95313;124.0071;126.0031|5516.34299129637;3277.06393521053;13425.9743636605;8741.62837447215	1	-0.0392386	0.00261147	-0.0194852	0.00779058	-0.0016439	0.0156915	4.82242	5	0.301218	4.62026	2	0.163898	4.66244	3	0.208195	4.65483	3	0.189369	#NUM!	0		4.74243	8	0.24474	4.63755	5	0.17165	4.72134	7	0.23588	4.65864	6	0.198228	0.144149	0.84119	0.654977
FT006	FT006	494.976	78.9596	Carbon dioxide		78.9593	78.9596	494.682	495.612	3	3791;5526;18330		0	-0.0252273	-0.0414321	-0.0281404	-0.0422878	0.0062243	-0.0362018	5.15986	2	0.548173	4.88106	0	0.354374	4.88106	0	0.39258	5.03476	1	0.488372	#NUM!	0		5.02046	2	0.472868	4.95791	1	0.423034	5.02046	2	0.466224	4.95791	1	0.434109	0.144928	0.838848	0.654977
FT718	FT718	404.348	786.087			786.085	786.09	403.327	405.619	16	608;1339;2073;4572;6260;7162;8055;9458;10213;10933;12973;13731;15116;15906;16713;18951	59.0143;130.062;141.0167;170.0428;212.065;223.0198;294.0681;305.0232;316.0502;376.071;387.0261;398.0526;458.0743;469.0288;480.0557;540.0768;551.0325;562.0591;622.0813;704.0858;726.067;786.0902|334.888157731301;1652.61558349831;21647.9340438712;429.776479822645;18345.2359758796;10908.896014757;6993.17505438922;19130.0647260172;303.813360411664;12786.3852696163;20357.7389074213;548.94419601172;1827…	1	-0.0399879	-0.0116659	0.00883174	0.0133145	-0.049866	-0.0500409	5.06424	3	0.477298	5.27438	5	0.648948	5.06737	3	0.534884	5.07792	3	0.517165	#NUM!	0		5.06581	6	0.51495	5.17615	8	0.59247	5.16931	8	0.571429	5.07265	6	0.531561	0.145254	0.837873	0.654977
FT606	FT606	45.4022	719.488	PG(16:0/16:1(9Z));PG(16:1(9Z)/16:0);Lupeoside		719.487	719.489	45.2222	45.63	3	4450;5245;16607	78.95891;152.9956;171.0057;209.0206;227.0323;227.2018;228.2048;252.4447;253.2178;254.2202;254.4533;255.2332;256.2366;280.2346;281.2483;282.2522;363.1865;389.2111;391.2251;409.2345;417.2411;455.2435;463.2456;465.2617;481.2558;483.272;491.2786;509.2861;645.4513;645.497;659.5114;717.219;717.2721;719.3503;719.4117;719.4895;720.4165;720.4957;720.612;720.8444;720.8882;721.0096;721.4953;721.7895|83.6572…	1	-0.00648248	-0.0369771	-0.0835116	0.00567055	-0.0118086	-0.0221359	5.24688	2	0.607973	4.88106	0	0.354374	4.88106	0	0.39258	5.08401	1	0.524917	#NUM!	0		5.06397	2	0.513843	4.98254	1	0.45515	5.06397	2	0.498339	4.98254	1	0.462901	0.145569	0.836932	0.654977
FT730	FT730	67.4839	792.493	PE(18:1/13-HODE);PE(18:1/9-HODE);Phosphatidylethanolamine al		792.49	792.493	66.2496	68.1491	5	4580;6268;12981;16722;17536		0	-0.0169913	-0.0232355	-0.0333588	-0.0136384	0.0383018	-0.0245173	4.61246	2	0.151717	4.42307	0	0.0531561	4.47324	1	0.0852713	4.56458	2	0.13732	#NUM!	0		4.54285	3	0.104097	4.49382	2	0.0885936	4.51776	2	0.0852713	4.51891	3	0.10299	0.146536	0.834057	0.654977
FT039	FT039	442.412	131.082	Ornithine;D-Ornithine;Ornithine		131.046	131.082	441.397	443.307	4	1522;4825;11832;16948		0	0.0143208	0.0107738	-0.0119912	0.000565643	0.00704893	-0.00923043	4.42189	2	0.0465116	4.30476	0	0.0166113	4.36895	1	0.03433	4.36934	1	0.0509413	#NUM!	0		4.39542	3	0.0354374	4.33705	1	0.0299003	4.36332	2	0.0276855	4.36914	2	0.03433	0.15045	0.822608	0.654977
FT888	FT888	238.503	966.586	Trihexosylceramide (d18:1/12:0)		966.583	966.591	233.055	240.899	26	756;1474;2205;2961;3755;4744;5483;6440;7320;8214;8911;9606;10360;11063;11788;12334;13123;13876;14540;15251;16048;16873;17693;18314;19106;19778	135.0306;259.2424;303.2329;418.2727;436.2833;720.2864;721.5038;722.5151;723.5182;816.5576;966.5941|3566.27633570849;947.688775510264;34595.9552852473;1491.71951228112;6297.6741243708;745.58441845038;1254.99731017881;226174.930499276;1672.27015380523;892.478209936758;20657.4589615057	1	0.00487864	-0.0331177	-0.026529	-0.0234981	-0.0268118	0.0231804	5.34464	6	0.658915	5.16851	6	0.58361	5.35909	6	0.715393	5.21711	6	0.606866	#NUM!	0		5.35186	12	0.69546	5.19281	12	0.599114	5.25658	12	0.629014	5.2881	12	0.665559	0.150572	0.822255	0.654977
FT873	FT873	237.1	926.615	3-O-Sulfogalactosylceramide (d18:1/24:0)		926.613	926.616	235.236	239.957	14	741;6419;8899;10348;11049;11773;13108;14521;15234;16859;17677;18303;19090;19765	135.0312;748.5311;776.5575;926.5267;926.6205|299.506313428009;50.6711909295973;68.0322066956933;76.8742231731267;494.155312411198	1	0.00951471	-0.0333614	0.0132052	0.049151	0.0632279	0.0148919	4.35608	1	0.0310078	4.53274	3	0.104097	4.60778	4	0.173865	4.7616	5	0.252492	#NUM!	0		4.48193	5	0.0719823	4.64717	8	0.178295	4.44441	4	0.055371	4.68469	9	0.211517	0.150621	0.822114	0.654977
FT586	FT586	246.341	701.532	Plastoquinone 8;Glycerol 1,2-didodecanoate 3-tetradecanoate;		701.531	701.533	242.047	247.728	26	501;1243;1975;2734;3524;4428;5227;6121;7054;7949;8695;9373;10113;10840;11553;12140;12864;13632;14274;15008;15801;16587;17425;18091;18848;19562		0	0.00549998	-0.0376165	-0.0263218	0.00426956	0.0086966	0.0320268	5.39419	6	0.696567	5.2414	6	0.632337	5.40217	6	0.733112	5.42747	6	0.724252	#NUM!	0		5.39818	12	0.722038	5.33444	12	0.679956	5.3178	12	0.673311	5.41482	12	0.727575	0.150668	0.82198	0.654977
FT531	FT531	472.319	611.169	Safflomin A;Carthamidin 6,7-diglucoside;Aromadendrin 3,7-dig		611.168	611.169	471.975	472.663	2	2679;3462		0	-0.0146312	0.0303044	-0.00925404	-0.00613464	0.00197374	0.0159277	5.11653	2	0.508306	4.88106	0	0.354374	4.88106	0	0.39258	4.88106	0	0.34773	#NUM!	0		4.99879	2	0.459579	4.88106	0	0.342193	4.99879	2	0.445183	4.88106	0	0.371539	0.151023	0.820957	0.654977
FT806	FT806	288.528	855.504	Phosphatidylinositol 16;Phosphatidylinositol 16;PI(16:0/18:2		855.502	855.506	286.69	290.282	24	685;1409;2146;2892;3694;4659;5415;6357;7246;8138;8846;9524;10289;10999;11718;13053;13809;14460;15982;16794;17617;18250;19038;19710	152.9954;223.0006;241.0116;253.2163;255.233;257.2262;259.0225;277.2173;279.2327;297.0376;301.2171;303.2328;315.0487;389.2085;391.225;409.2342;413.2101;415.2239;551.2613;553.2778;569.2702;571.2881;575.2624;577.2797;599.2632;601.2793;695.4668;811.5464;852.869;855.5065;855.5901;856.5121;857.5187;858.5244;859.5416|893.077532956643;893.5128275062;5072.06424685604;1033.50742330378;2951.44955725599;272.…	1	-0.0286396	0.00185793	0.0147546	0.00102664	-0.00541873	0.0196965	5.19313	6	0.571429	5.29817	6	0.66113	5.06593	4	0.532669	5.26118	6	0.644518	#NUM!	0		5.12953	10	0.552602	5.27967	12	0.658915	5.24565	12	0.619048	5.16355	10	0.59247	0.151464	0.819692	0.654977
FT618	FT618	70.1277	729.508	DG(20:1(11Z)/22:6(4Z,7Z,10Z,13Z,16Z,19Z)/0:0);DG(20:2(11Z,14		729.506	729.51	68.9889	72.7666	25	530;1269;2000;2758;3551;4463;5257;6153;7084;7974;8717;9400;10141;10867;11579;12894;13656;14299;15032;15830;16618;17451;18112;18874;19586	137.001;155.0111;211.0383;253.2176;255.2327;279.2327;281.2483;449.2653;467.2767;473.2687;491.2763;727.2559;729.5094|499.576477034046;604.768671543103;422.430592202058;3008.09498982559;21639.6978459713;61253.6952107466;3814.36061999664;888.612959173861;3572.22907656968;610.468554764617;523.081804648439;612.970045595489;163799.812363266	1	-0.0120957	-0.0283778	-0.064674	-0.050373	-0.028092	0.0859778	5.4504	6	0.727575	5.15689	6	0.571429	5.17385	5	0.606866	5.10775	6	0.540421	#NUM!	0		5.31213	11	0.669989	5.13232	12	0.55814	5.30364	12	0.655592	5.1408	11	0.579181	0.151739	0.818902	0.654977
FT014	FT014	243.333	92.0255	Allylamine		92.0252	92.0256	239.957	247.073	26	12;795;1499;2240;3001;3798;4801;5533;6495;7361;8259;8932;9642;10389;11092;11810;12368;13160;13896;14582;15277;16084;16925;17716;18337;19132	65.01454;92.02522|3215.55824049612;2619.11589445935	1	-0.0154357	-0.0408534	0.0197416	0.0105012	-0.0224946	0.00936969	5.23537	6	0.599114	5.38829	6	0.704319	5.37519	6	0.724252	5.46328	6	0.741971	#NUM!	0		5.30528	12	0.665559	5.42579	12	0.728682	5.31183	12	0.666667	5.41924	12	0.730897	0.151913	0.818404	0.654977
FT406	FT406	441.397	493.031	Fumarprotocetraric acid		493.026	493.037	440.523	443.014	15	345;1102;2573;4216;5925;7757;8561;9238;9963;10706;13491;15636;16439;17272;19439	78.95885;96.96945;111.0196;134.0471;138.9797;150.9798;192.9905;211.0011;280.0227;323.0287;324.0314;346.0556;493.0261|10393.4564604509;6377.14659282335;485.199092497721;807.680481346424;1605.03640028078;2304.4861855042;1433.70669134845;7298.79651811347;4116.19592507346;105115.383936401;539.481085723412;36232.0007789986;841.161362450282	1	-0.0495652	0.0291279	0.0370285	-0.0743962	0.072832	-0.0443665	4.68283	3	0.199336	5.0279	5	0.482835	4.40484	1	0.0442968	4.75792	4	0.246955	#NUM!	0		4.54384	4	0.106312	4.89291	9	0.361019	4.85537	8	0.334441	4.58138	5	0.146179	0.151953	0.818292	0.654977
FT466	FT466	373.541	548.899			548.897	548.9	372.653	374.956	24	394;1148;1879;2626;3402;4285;5143;5984;6933;7812;8600;9277;10011;10753;11466;12761;13532;14203;14922;15690;16494;17317;18738;19476	59.0144;156.5149;156.991;254.9682;352.945;450.9213|151695.614146099;3151.95526174004;890588.677863517;132530.984382341;173741.89122905;16917.8396957842	1	-0.06775	0.00235213	-0.010321	0.00845404	-0.000901766	-0.00141876	5.87649	6	0.884828	5.96663	6	0.912514	5.63019	5	0.833887	5.70295	5	0.842746	#NUM!	0		5.75334	11	0.863787	5.83479	11	0.887043	5.92156	12	0.90144	5.66657	10	0.838317	0.152127	0.817793	0.654977
FT623	FT623	69.8139	731.522	DG(20:0/22:6(4Z,7Z,10Z,13Z,16Z,19Z)/0:0);DG(20:1(11Z)/22:5(4		731.52	731.525	68.8332	72.7666	24	533;1273;2003;2761;3554;4467;5261;6159;7088;7979;8721;9402;10145;10871;11582;12157;12898;13660;14303;15038;15834;17455;18115;19589	253.2158;255.2325;256.2356;279.2326;280.2364;281.2483;467.2779;475.2805;493.2916;731.524|277.522543212952;11256.6161002916;486.472589141172;2012.92987832262;2001.39563722174;23851.1177069873;1320.09970340976;282.634968154309;372.392141654342;79050.62420774	1	0.0278999	-0.00439384	-0.0477449	-0.0732282	-0.0377835	0.0583087	5.21008	6	0.584718	4.94524	6	0.421927	5.14221	6	0.593577	4.82366	4	0.294574	#NUM!	0		5.17614	12	0.58804	4.88445	10	0.349945	5.07766	12	0.508306	4.98294	10	0.464009	0.152988	0.815342	0.654977
FT255	FT255	59.9538	319.228	5-(1,2,4a,5-tetramethyl-7-oxo-3,4,8,8a-tetrahydro-2H-naphtha	+	319.227	319.229	57.9473	60.5426	22	220;984;3214;4038;4998;5758;6735;7601;8440;9836;10588;11298;11978;12577;13359;14776;15500;16307;17130;17888;18546;19320	59.01401;167.1073;179.1071;208.1106;257.2276;301.217;319.2275|1060.06775528636;6149.16453630927;4029.17776067376;1151.09386983297;4941.30372868079;7150.4810573934;18016.4399496626	1	-0.0125157	-0.0254238	0.040913	-0.00592754	-0.0204495	-0.00651658	4.88852	4	0.364341	5.19026	5	0.604651	5.10707	5	0.564784	5.09435	6	0.531561	#NUM!	0		4.9978	9	0.458472	5.14231	11	0.564784	5.03939	9	0.481728	5.10071	11	0.551495	0.153623	0.813544	0.654977
FT588	FT588	400.267	702.026			702.024	702.028	399.277	401.962	22	502;1244;1976;2735;3525;4429;5228;6122;7055;7950;8696;9375;10114;10841;11554;12865;13633;15802;16588;17426;18849;19563		0	-0.0324101	0.0230984	-0.00484031	0.0106574	0.00552553	-0.00153462	4.98423	6	0.424142	5.05494	6	0.504983	4.80814	3	0.316722	4.90505	5	0.374308	#NUM!	0		4.89618	9	0.368771	4.97999	11	0.451827	5.01959	12	0.464009	4.85659	8	0.339978	0.153996	0.812491	0.654977
FT095	FT095	336.764	187.042	STD_Xylitol;STD_L-Arabitol;Isoplumbagin		187.042	187.042	335.749	338.379	23	84;864;3082;3881;4877;5609;7449;8325;9003;9706;10458;11169;11871;12446;13224;13963;14652;15358;16161;17005;17780;18408;19204	115.0204;187.0415|8755.38564299804;3681.38463614625	1	0.0211564	-0.00593454	0.0182003	0.00744599	0.0209515	-0.0103579	4.79145	4	0.283499	5.00652	5	0.465116	5.12775	6	0.581395	5.06138	6	0.51052	#NUM!	0		4.9596	10	0.421927	5.03395	11	0.492802	4.89899	9	0.365449	5.09457	12	0.543743	0.15443	0.811267	0.654977
FT162	FT162	406.608	252.046	Captopril;Captopril;Captopril (Capoten)		252.045	252.047	405.853	408.311	23	136;912;1645;3139;3948;4930;5668;6647;7512;8367;9054;9759;10510;11222;12497;13278;14702;15413;16217;17055;17820;18468;19248	59.01412;88.04028;141.0169;170.043|3023.91436100202;18137.2431550193;332.731829116248;3020.33299693633	1	-0.044926	-0.0200515	0.0206289	0.0273976	0.00861522	-0.00390847	4.72959	5	0.236988	4.90374	6	0.384275	4.72258	4	0.248062	4.9043	6	0.3732	#NUM!	0		4.72608	9	0.236988	4.90402	12	0.368771	4.81667	11	0.296788	4.81344	10	0.302326	0.154936	0.809848	0.654977
FT541	FT541	493.974	620.021	ADP-ribose 1"-2" cyclic phosphate		620.02	620.022	493.657	494.292	2	4369;6061	78.95889;134.0463;158.9247;174.9808;176.936;254.9462;272.9572;290.9672;328.0453;352.9219;370.9326;408.0117;426.0213;469.9685;484.9656;487.9777;505.9888;522.0447;540.0537;602.0106;620.0219|245.861060304934;163.258669563129;979.202120544336;344.657230039999;161.250659140632;178.438973961671;1981.72267666726;394.421194957849;312.573658953374;204.013851162642;124.84455917687;5038.90621628871;535.1777…	1	-0.00732536	-0.0108844	-0.0179211	-0.028445	0.00833635	-0.00867119	4.68056	2	0.194906	4.55495	0	0.120709	4.55495	0	0.13732	4.55495	0	0.126246	#NUM!	0		4.61776	2	0.160576	4.55495	0	0.112957	4.61776	2	0.143965	4.55495	0	0.128461	0.155735	0.807614	0.654977
FT452	FT452	267.226	531.272	Pregnanediol-3-glucuronide;3-alpha,20-alpha-Dihydroxy-5-beta		531.271	531.273	265.121	271.931	16	383;1140;1871;2615;3391;4272;5133;5970;7799;9270;9999;10745;12751;15679;16479;18726	152.9953;227.0328;255.232;256.2362;259.2423;303.2327;481.3129;531.2725|2330.57420994242;646.700180206699;740.830689934867;1303.0992765088;553.475927179898;14548.0884010033;1891.38441510525;21838.7993128491	1	-0.0493268	0.0122427	-0.0557581	0.0183934	-0.0199341	-0.032831	5.25472	6	0.612403	5.06165	4	0.508306	4.83489	1	0.344408	5.0469	3	0.498339	#NUM!	0		5.0448	7	0.493909	5.05428	7	0.507198	5.15819	10	0.564784	4.94089	4	0.426357	0.155882	0.807205	0.654977
FT050	FT050	374.684	142.975	Bis(methylthio)methane;1,2-Propanedithiol;1,3-Propanedithiol		142.974	142.977	372.895	376.493	23	43;824;1535;2269;3036;4837;5563;6533;7400;8289;8966;9673;10420;11126;12401;13190;13926;14614;15307;16120;16963;18369;19164	59.01377|642.022258170519	1	-0.0166809	0.0156626	0.000750267	0.0170781	0.00535486	0.00804773	4.64153	5	0.17165	4.76208	6	0.255814	4.62079	5	0.181617	4.61681	5	0.170543	#NUM!	0		4.63116	10	0.168328	4.68945	11	0.208195	4.70181	11	0.219269	4.6188	10	0.169435	0.156527	0.80541	0.654977
FT269	FT269	236.969	331.078	MGMG 2:0;(E)-1-O-Cinnamoyl-beta-D-glucose;(E)-2-O-Cinnamoyl-		331.077	331.079	232.268	240.899	26	232;995;1727;2454;3228;4052;5008;5775;6750;7614;8451;9139;9852;10601;11309;11987;12591;13371;14087;14791;15512;16320;17143;17897;18559;19332	87.00865;200.0565;243.0623|50370.8351254193;1071.84107151617;3842.04474003584	1	-0.00687715	-0.0198703	-0.0135207	-0.0379415	-0.0661498	0.00899008	5.40203	6	0.699889	5.2351	6	0.631229	5.38941	6	0.728682	5.20424	6	0.602436	#NUM!	0		5.39572	12	0.718715	5.21967	12	0.616833	5.31857	12	0.674419	5.29682	12	0.678848	0.156692	0.804952	0.654977
FT889	FT889	238.566	967.589			967.587	967.594	233.055	240.899	26	757;1475;2206;2962;3756;4745;5484;6441;7321;8215;8912;9607;10361;11064;11789;12335;13124;13877;14541;15252;16049;16874;17694;18315;19107;19779		0	0.00507547	-0.0306074	-0.0260361	-0.0236962	-0.0223826	0.0208018	5.1055	6	0.501661	4.94049	6	0.419712	5.10939	6	0.566999	4.97808	6	0.442968	#NUM!	0		5.10745	12	0.538206	4.95929	12	0.425249	5.023	12	0.467331	5.04374	12	0.513843	0.156864	0.804478	0.654977
FT658	FT658	240.111	753.558	PA(18:1(11Z)/22:2(13Z,16Z));PA(18:1(9Z)/22:2(13Z,16Z));PA(18		753.558	753.561	237.305	243.015	14	560;1302;4513;6199;11610;12178;12932;13685;14332;15070;16662;17481;18138;18905		0	0.0265029	-0.0621447	-0.00618198	-0.00637815	0.0128541	-0.0147759	4.57244	2	0.128461	4.401	0	0.0465116	4.94169	6	0.445183	4.75097	4	0.242525	#NUM!	0		4.75706	8	0.256921	4.57599	4	0.127353	4.48672	2	0.0719823	4.84633	10	0.331118	0.158702	0.799417	0.654977
FT047	FT047	401.164	141.017	(S)-3,4-Dihydroxybutyric acid;2,4-Dihydroxybutanoic acid;4-D		141.017	141.018	399.244	402.514	26	40;822;1531;2267;3033;3833;4835;5561;6529;7398;8287;8964;9671;10417;11124;11839;12398;13188;13924;14612;15305;16117;16961;17743;18367;19162	58.83929;59.01472;59.40224;59.41669;59.44815|1728.57634970027;488858.923874698;966.976879851978;599.389125521507;339.254078583027	1	0.00396616	0.0144495	0.00456955	0.00430079	-0.00294684	-0.00637422	6.69705	6	0.990033	6.75519	6	0.990033	6.72732	6	0.993355	6.69728	6	0.992248	#NUM!	0		6.71219	12	0.993355	6.72623	12	0.990033	6.72612	12	0.992248	6.7123	12	0.992248	0.15946	0.797348	0.654977
FT734	FT734	68.096	794.508	PE(18:0/9-HODE);PE(22:6(4Z,7Z,10Z,13Z,16Z,19Z)/P-18:1(11Z));		794.506	794.509	66.2496	68.6468	13	620;2085;3629;4584;6272;7177;8067;12986;15129;16727;17541;18183;18963		0	-0.0481998	-0.0368839	-0.035901	0.0144627	0.0468649	-0.0258215	5.16424	4	0.552602	4.86949	2	0.334441	4.89572	2	0.41196	5.07657	4	0.51495	#NUM!	0		5.02998	6	0.479513	4.97303	6	0.445183	5.01687	6	0.460687	4.98615	6	0.467331	0.160306	0.795049	0.654977
FT670	FT670	47.9728	762.584	Glucosylceramide (d18:1/18:0);Galactosylceramide (d18:1/18:0		762.582	762.588	45.3144	49.1913	17	3584;4524;6211;7131;8022;8755;9429;10180;11620;13697;14343;15080;16672;17490;18146;18914;19619		0	0.00150373	-0.0235806	0.0421869	0.00364313	0.0579143	0.0327812	4.79099	3	0.282392	4.9925	5	0.45515	4.92544	4	0.433001	5.01696	5	0.478405	#NUM!	0		4.85821	7	0.342193	5.00473	10	0.470653	4.89174	8	0.357697	4.9712	9	0.45072	0.160367	0.794886	0.654977
FT165	FT165	47.1249	254.219			254.218	254.22	45.6663	48.326	14	139;915;3951;6650;7515;9762;12500;13280;14705;15416;16220;17058;17823;18471		0	-0.0294597	-0.0369206	0.0335554	0.0317395	-0.0253985	-0.0116193	4.49223	1	0.0819491	4.66311	3	0.194906	4.68457	3	0.225914	4.81251	5	0.289037	#NUM!	0		4.5884	4	0.14175	4.73781	8	0.238095	4.57767	4	0.116279	4.74854	8	0.252492	0.160403	0.794789	0.654977
FT399	FT399	400.019	485.003			485	485.004	399.277	401.03	13	339;1098;1829;2568;3345;6878;7753;9234;9959;10702;13486;15632;18679		0	-0.0300671	0.0274449	0.022826	0.00223057	-0.0417081	-0.0171926	4.55834	3	0.120709	4.71878	5	0.232558	4.43481	1	0.0653378	4.48754	2	0.0974529	#NUM!	0		4.49658	4	0.0797342	4.60316	7	0.150609	4.63856	8	0.16722	4.46118	3	0.0786268	0.162992	0.787833	0.655325
FT537	FT537	279.37	617.272	Pipercyclobutanamide B;Dipiperamide D;APC		617.272	617.274	276.062	281.859	14	1933;4366;7004;7890;8652;10065;11516;12122;13590;14970;15752;16545;17373;18801	152.9951;303.2322;457.2357;539.2413;599.264;617.2732;617.3624;617.4068|3666.89473494143;2146.76215587177;2158.941603935;334.285502259968;348.278346314078;15183.6468484167;809.490753159372;1030.03151909705	1	-0.00294616	-0.0288934	0.0361136	0.00466586	6.41692e-05	0.000648319	4.43013	2	0.0498339	4.61917	4	0.160576	4.64463	4	0.189369	4.6007	4	0.158361	#NUM!	0		4.53738	6	0.100775	4.60993	8	0.155039	4.52465	6	0.0874862	4.62266	8	0.174972	0.16334	0.786908	0.655325
FT789	FT789	65.9264	844.523	PC(17:1/18-HETE);PC(17:1/20-HETE);PE(DiMe(11,3)/DiMe(11,3))		844.521	844.526	64.9414	67.3767	19	673;2137;2881;3681;4646;6341;7234;8128;10275;10991;11706;13038;13800;15172;15969;16780;17601;19025;19698		0	-0.0461428	-0.0213515	-0.0221335	0.0022224	0.0370644	-0.00552412	4.92386	5	0.379845	4.71792	4	0.230343	4.75931	4	0.269103	4.81132	5	0.287929	#NUM!	0		4.84158	9	0.330011	4.76462	9	0.261351	4.82089	9	0.300111	4.78531	9	0.282392	0.163942	0.785308	0.655325
FT887	FT887	241.391	946.635	PS(22:2(13Z,16Z)/24:1(15Z));PS(24:1(15Z)/22:2(13Z,16Z))		946.633	946.638	238.27	243.178	25	754;1473;2203;2958;4738;5476;6434;7311;8209;8910;9604;10358;11061;11785;12331;13121;13875;14535;15247;16044;16871;17690;18313;19104;19777		0	0.0158599	-0.023839	0.0159095	-0.0077881	-0.0148918	0.00619953	4.86894	5	0.33887	4.99472	6	0.457364	5.0945	6	0.555925	5.03457	6	0.487265	#NUM!	0		4.98172	11	0.448505	5.01465	12	0.479513	4.93183	11	0.395349	5.06453	12	0.526024	0.16528	0.781779	0.655325
FT512	FT512	324.273	595.288	Ganoderic acid alpha;Ganoderic acid K;Pipercyclobutanamide B		595.287	595.29	322.046	326.367	25	430;1181;1915;2663;3441;4334;5173;6026;6975;7861;8633;9310;10043;10782;11495;12797;13567;14230;14950;15726;16525;17351;18042;18773;19505	152.9956;223.0009;241.0118;279.2325;315.0487;415.2248;595.2892|12582.5795857822;1155.4211547147;11252.7343111962;33829.6906586332;8648.03514174929;2235.06410034802;106366.154794336	1	-0.0294938	-0.0303618	0.038419	0.00105558	0.000421966	0.0273154	4.98494	6	0.429679	5.1229	6	0.55371	4.96747	5	0.469546	5.19448	6	0.596899	#NUM!	0		4.97621	11	0.440753	5.15869	12	0.575858	5.05392	12	0.490587	5.08097	11	0.538206	0.165293	0.781746	0.655325
FT726	FT726	289.359	790.545	PC(15:0/22:6(4Z,7Z,10Z,13Z,16Z,19Z));PC(22:6(4Z,7Z,10Z,13Z,1		790.542	790.548	286.665	292.053	2	7169;8060		0	-0.0124773	-0.00134247	0.0154664	-0.00786851	-0.0137994	-0.00190129	4.11336	0	0.00442968	4.25241	2	0.00996678	4.11336	0	0.00442968	4.11336	0	0.0055371	#NUM!	0		4.11336	0	0.00442968	4.18289	2	0.00664452	4.18289	2	0.0055371	4.11336	0	0.00442968	0.165391	0.781489	0.655325
FT359	FT359	406.403	445.077	Glucorhein;Genistein 4'-O-glucuronide;Genistein 5-O-glucuron		445.075	445.079	405.146	407.514	21	299;1064;3304;4156;5871;6840;7711;8520;9204;9922;10671;11385;12670;13447;14858;15597;16397;17228;17962;18642;19407	88.04008;141.017;170.0429;199.0702;252.0469;281.0726;281.111;363.0775|2047.55366465126;401.376956728191;4001.09178972844;3355.9616771836;206.268548835538;417.412321228937;472.371504882165;279.91537314519	1	-0.0423605	-0.0343626	0.030541	0.0111795	0.0283098	-0.0100782	4.69788	3	0.21041	4.91622	6	0.396456	4.8285	4	0.336656	4.94831	6	0.420819	#NUM!	0		4.76319	7	0.263566	4.93226	12	0.396456	4.80705	9	0.286822	4.88841	10	0.385382	0.16603	0.779815	0.655325
FT106	FT106	71.601	199.145	Spermine dialdehyde;Hexamethylene bisacetamide;(S)-gamma-Cal		199.144	199.145	70.1118	74.1195	26	90;871;1595;2318;3089;3893;4886;5619;6586;7461;8328;9010;9714;10465;11177;11877;12454;13235;13970;14656;15367;16170;17011;17783;18417;19208	156.1391;199.145|14910.6824090772;1417.47710676955	1	0.0152782	0.0127789	-0.0680543	-0.0411586	-0.0801118	0.0466163	5.57316	6	0.778516	5.26826	6	0.645626	5.30456	6	0.6866	5.05292	6	0.501661	#NUM!	0		5.43886	12	0.741971	5.16059	12	0.576966	5.42071	12	0.72093	5.17874	12	0.599114	0.166432	0.778764	0.655325
FT403	FT403	434.54	489.173	Butyl (S)-3-hydroxybutyrate [arabinosyl-(1->6)-glucoside];3,		489.17	489.175	431.909	437.999	18	343;1101;1832;2572;4214;5106;5924;8559;9962;11426;12067;12712;13489;14173;14887;15635;17270;17989		0	0.0266193	-0.0148414	-0.0303318	-0.0516628	-0.00922187	0.107214	4.94549	5	0.399779	4.6571	2	0.190476	5.08543	6	0.548173	4.6975	3	0.209302	#NUM!	0		5.01546	11	0.470653	4.6773	5	0.198228	4.80129	7	0.280177	4.89147	9	0.388704	0.168719	0.772837	0.658535
FT297	FT297	100.529	353.233	NCGC00384809-01!5-[5-hydroxy-3-(hydroxymethyl)pentyl]-8a-(hy	+	353.231	353.233	97.7952	106.541	12	1743;3252;7642;8472;9875;11328;12611;14807;17167;17917;18582;19353	111.0198;113.0969;137.0965;163.1122;165.1271;177.127;183.1023;191.144;193.1225;195.1017;209.1174;219.1756;221.1182;235.1335;273.2219;291.1966;291.232;309.2082;317.2116;335.223;353.2011;353.2335|626.528183815456;326.328475880579;272.381931205958;236.537015379814;139.37017956567;127.911888931028;236.371617345186;1144.39347102278;188.548256330039;195.195918408859;831.777372009822;146.441489198607;70…	1	-0.00844252	-0.0272663	0.0692059	0.0470753	0.0883313	0.0736368	4.63143	2	0.168328	4.97186	3	0.438538	4.92873	3	0.437431	5.04538	4	0.496124	#NUM!	0		4.78008	5	0.283499	5.00862	7	0.475083	4.80165	5	0.281285	4.98705	7	0.469546	0.168852	0.772495	0.658535
FT192	FT192	269.678	279.039	STD_Uridine;Uridine (Not validated);URIDINE	+	279.038	279.039	267.623	272.956	24	164;937;1674;2391;3164;3978;4950;5697;6678;7543;8390;9782;10542;11247;11936;12524;13305;14032;14729;15440;16248;17839;18493;19273	110.0246;111.0198;152.0348;200.056;243.0615|790.168105246349;478.39733229827;275.593092289215;877.755397439614;1959.95689913028	1	0.0115316	-0.0128692	-0.0185152	-0.0312399	-0.0642031	0.00512656	5.16263	6	0.551495	4.99871	5	0.459579	5.17766	6	0.610188	4.97322	5	0.438538	#NUM!	0		5.17014	12	0.579181	4.98596	10	0.458472	5.08067	11	0.512735	5.07544	11	0.534884	0.169841	0.769957	0.658535
FT282	FT282	432.486	341.108	STD_Maltose ;STD_D-Lactose*H2O;STD_D-Cellobiose	+	341.107	341.109	431.319	434.003	25	241;1004;1732;2464;3239;4069;5014;5789;6760;7630;8459;9148;9862;10610;11317;11992;12598;13381;14094;14799;15522;17152;17905;18572;19341	59.01397;71.01374;73.02938;89.02418;97.02929;101.0242;113.0241;119.0344;161.0451;221.0663|3966.11801670335;1992.58667393237;2741.22228965043;1640.8999794605;1261.28417384576;2888.80654959044;878.729305174162;593.030356258878;1704.07587672208;2516.39885891783	0.928571	0.00231361	0.0236422	-0.0239389	-0.0685806	-5.28695e-05	0.0847228	5.23516	6	0.598007	5.04616	6	0.501661	5.12494	6	0.575858	4.82915	5	0.301218	#NUM!	0		5.18005	12	0.590255	4.93765	11	0.404208	5.14066	12	0.548173	4.97704	11	0.45515	0.17052	0.768224	0.658535
FT293	FT293	103.461	352.221	Levomethadyl Acetate;Methadyl Acetate		352.22	352.222	101.47	109.255	18	247;1011;4079;5801;6769;7638;8469;9871;11326;12607;13388;14803;15532;16336;17163;17913;18579;19349		0	-0.0292672	-0.0584374	0.0637566	0.0176978	0.0455272	0.0220911	4.43648	2	0.055371	4.68358	4	0.209302	4.68085	4	0.220377	5.00184	6	0.464009	#NUM!	0		4.55866	6	0.115172	4.84271	10	0.312292	4.56003	6	0.105205	4.84134	10	0.326689	0.171198	0.766501	0.658535
FT852	FT852	241.38	902.613			902.61	902.616	238.171	244.475	22	724;1449;2929;3730;4710;5448;6397;7287;8180;8882;10329;11036;11755;13092;13851;14501;15216;16840;17660;18286;19076;19746	135.0309;303.2321;752.5654;766.5394;902.5513;902.6191|2622.18966808743;348.896740104823;438.789216987198;2375.440472256;471.043753463744;3719.81194304224	1	-0.0153888	-0.0418365	0.0262458	0.0168863	0.0136155	0.0267015	4.85624	5	0.324474	5.03655	5	0.491694	5.00498	5	0.490587	5.04351	5	0.491694	#NUM!	0		4.93061	10	0.397564	5.04003	10	0.497231	4.9464	10	0.406423	5.02425	10	0.495017	0.172359	0.763565	0.658535
FT130	FT130	400.934	224.023	Thiotepa		224.022	224.024	399.244	401.962	26	110;889;1616;2342;3114;3921;4905;5642;6614;7487;8347;9025;9733;10484;11201;11896;12476;13255;13991;14681;15388;16189;17030;17801;18440;19226		0	0.00474207	0.0177683	0.00226567	0.00477688	-0.00700933	-0.0120238	4.99657	6	0.438538	5.06174	6	0.509413	5.02454	6	0.500554	4.978	6	0.44186	#NUM!	0		5.01055	12	0.467331	5.01987	12	0.48505	5.02915	12	0.472868	5.00127	12	0.477298	0.172866	0.76229	0.658535
FT187	FT187	462.449	274.104	Glu-Gln;gamma-Glutamylglutamine;Norophthalmic acid	+	274.103	274.105	461.474	463.499	24	161;933;1671;2387;3162;3974;4946;5694;6673;7537;8386;9078;9780;10537;11244;12522;13301;14028;14725;15436;16245;17080;18487;19270	82.02997;84.04545;101.0719;109.0406;127.051;128.0349;145.0616;145.0974;194.0934;212.1038;238.0835;256.0938;274.105|431.619165202748;1870.84283281143;772.289963581127;3439.31073598684;15700.1340563438;21267.6092487141;25317.4314442233;382.63723522287;6506.40786061236;1645.76123074037;5978.79860682982;3402.57559790877;1223.95911960628	1	-0.0400635	-0.00741845	-0.0211634	-0.0100475	0.0075698	0.00871932	5.11971	6	0.51052	5.00584	6	0.464009	4.99434	5	0.487265	4.94421	5	0.415282	#NUM!	0		5.05702	11	0.507198	4.97503	11	0.44629	5.06278	12	0.497231	4.96927	10	0.448505	0.175486	0.755757	0.658535
FT584	FT584	246.517	700.529	PE(16:0/P-18:1(11Z));PE(16:0/P-18:1(9Z));PE(16:1(9Z)/P-18:0)		700.527	700.53	242.047	247.728	26	499;1241;1973;2732;3522;4426;5225;6119;7052;7947;8693;9371;10111;10838;11551;12139;12862;13630;14272;15006;15799;16585;17423;18090;18846;19560	140.0114;196.0385;239.2383;253.2173;255.2326;279.2326;280.2362;280.3873;281.2485;375.2292;418.2724;436.2825;444.2867;462.2982;698.3727;700.5305|833.922993587115;1191.76164791736;756.091711419184;1939.64081967198;19543.9570158445;3385.09364177847;3675.95709350933;466.593588494345;173638.38458681;391.37346648231;7938.82604375462;19642.546337011;877.316601912858;2051.40020917318;965.528386323308;305…	1	0.00499913	-0.0373765	-0.0255753	0.00640686	0.00952251	0.0317474	5.7624	6	0.859358	5.62063	6	0.812846	5.77167	6	0.883721	5.80369	6	0.871539	#NUM!	0		5.76703	12	0.869324	5.71216	12	0.844961	5.69151	12	0.840532	5.78768	12	0.878184	0.177248	0.751418	0.658535
FT564	FT564	515.393	666.218	Acarbose;Acarbose;ACARBOSE		666.216	666.219	511.9	518.678	16	482;1225;1955;2710;3500;4400;5213;6087;7037;7928;8674;10824;11539;13615;14991;15782		0	-0.0370651	0.0199845	-0.0146214	-0.0578804	-0.039508	0.0545062	4.78397	6	0.277962	4.56465	4	0.129568	4.48749	3	0.0908084	4.31717	1	0.0276855	#NUM!	0		4.63573	9	0.17165	4.44091	5	0.0653378	4.67431	10	0.191584	4.40233	4	0.0454042	0.177791	0.750091	0.658535
FT719	FT719	290.723	786.53	PS(18:0/18:2(9Z,12Z));PS(18:1(9Z)/18:1(9Z));PS(18:2(9Z,12Z)/		786.528	786.532	288.275	292.911	26	609;1340;2074;2823;3617;4573;5345;6261;7163;8056;8783;9459;10214;10934;11651;12208;12974;13732;14383;15117;15907;16714;17528;18172;18952;19647	78.9591;152.9957;279.2324;281.2486;283.2646;415.2249;417.2416;419.2567;433.2352;435.251;437.2672;699.4992;700.502;701.514;784.1018;786.5319;788.547|877.594758659769;8854.94527802537;8848.532600525;21497.1677969187;22726.1016379377;4533.16774144251;16957.8734841468;20800.7821988282;840.48999668712;6047.85255370746;8520.93671430294;104396.76930549;942.862154021805;383.512055197639;665.549719034652;…	1	-0.00270961	0.00987869	0.00211787	0.00511695	-0.0116991	-0.0343989	5.60909	6	0.799557	5.77137	6	0.871539	5.57312	6	0.816168	5.61948	6	0.806202	#NUM!	0		5.59111	12	0.809524	5.69542	12	0.837209	5.69023	12	0.839424	5.5963	12	0.816168	0.17835	0.748727	0.658535
FT458	FT458	374.5	534.882			534.881	534.883	372.895	376.033	17	387;1142;2618;4277;5137;5974;7803;8594;9273;10004;10748;13525;14197;15683;16486;17310;18730	59.01426;141.0164;142.975;156.9909;240.9523;254.9684;338.9283|514.566702594409;309.905915512323;1455.55950133613;1987.23532869792;155.28740909202;163.547833832479;343.546674672203	1	-0.0229615	0.0074292	0.0037728	-0.0302756	-0.00387322	-0.0279417	4.64208	4	0.172757	4.82444	5	0.299003	4.51593	2	0.109635	4.65049	4	0.186047	#NUM!	0		4.579	6	0.131783	4.73746	9	0.236988	4.73326	9	0.242525	4.58321	6	0.147287	0.17884	0.747535	0.658535
FT810	FT810	288.767	859.534	PI(16:0e/18-HETE);PI(16:0e/15-HETE);PI(16:0e/12-HETE)	+	859.531	859.536	286.69	290.282	26	689;1413;2150;2896;3698;4663;5419;6361;7250;8142;8850;9528;10293;11003;11721;12267;13057;13813;14464;15187;15986;16798;17621;18254;19042;19714	78.95872;152.9956;223.0012;241.0117;242.0153;243.016;255.2328;256.2356;257.2391;259.0225;277.2161;279.2327;280.2369;281.2483;283.2644;297.0379;303.2328;304.2362;305.2467;315.0486;391.2241;392.2281;393.2302;409.2341;415.2249;417.2406;419.256;435.2512;440.2313;441.2383;553.2783;554.2811;555.2834;571.2888;572.2953;573.2922;575.2613;577.278;578.2826;579.2939;581.3076;595.2895;597.3056;599.3171;602.28…	1	-0.0050689	-0.00332582	0.0207176	0.00156398	0.0253948	0.022741	5.99663	6	0.919158	6.11694	6	0.943522	5.99136	6	0.92691	6.15293	6	0.942414	#NUM!	0		5.99399	12	0.924695	6.13494	12	0.941307	6.05679	12	0.932447	6.07214	12	0.940199	0.179008	0.747127	0.658535
FT048	FT048	401.208	142.02			142.019	142.02	399.244	402.514	26	41;823;1532;2268;3034;3834;4836;5562;6530;7399;8288;8965;9672;10418;11125;11840;12399;13189;13925;14613;15306;16118;16962;17744;18368;19163		0	0.00380356	0.0138589	0.00497036	0.00312713	-0.0023371	-0.00566131	5.32172	6	0.651163	5.37629	6	0.699889	5.35434	6	0.713178	5.32088	6	0.672204	#NUM!	0		5.33803	12	0.6866	5.34859	12	0.687708	5.349	12	0.6866	5.33761	12	0.698782	0.179352	0.746294	0.658535
FT811	FT811	288.767	860.538	PS(18:0/22:4(7Z,10Z,13Z,16Z));PS(18:2(9Z,12Z)/22:2(13Z,16Z))		860.536	860.54	286.69	290.282	26	690;1414;2151;2897;3699;4664;5420;6362;7251;8143;8851;9529;10294;11004;11722;12268;13058;13814;14465;15188;15987;16799;17622;18255;19043;19715		0	-0.00438242	-0.00274318	0.0211791	-0.000131728	0.0253231	0.0189984	5.63574	6	0.810631	5.75888	6	0.866002	5.6263	6	0.83278	5.78884	6	0.866002	#NUM!	0		5.63102	12	0.826135	5.77386	12	0.868217	5.69731	12	0.843854	5.70757	12	0.851606	0.179763	0.745299	0.658535
FT280	FT280	38.2245	340.206			340.204	340.213	37.3485	39.1748	13	2462;3237;4068;5013;5787;7628;9146;9861;11991;14093;15521;17904;19340		0	0.0274034	0.0232587	-0.0292276	-0.137279	0.015057	-0.00249879	5.66412	5	0.822813	5.28963	3	0.655592	5.2017	2	0.627907	5.28305	3	0.654485	#NUM!	0		5.43291	7	0.738649	5.28634	6	0.667774	5.47687	8	0.748616	5.24237	5	0.635659	0.180936	0.742475	0.658535
FT186	FT186	292.053	273.074	(x)-1,2-Propanediol 1-O-b-D-glucopyranoside;1-(2,4,6-Trimeth		273.074	273.075	291.146	292.84	15	160;932;1670;3161;3973;4945;5693;6672;7536;10536;11243;12521;13300;14027;15435		0	-0.0290192	-0.00664931	-0.0836254	-0.0468483	-0.0882157	0.0571784	4.90734	5	0.369878	4.54912	3	0.115172	4.66948	4	0.21041	4.36323	1	0.047619	#NUM!	0		4.78841	9	0.290144	4.45618	4	0.06866	4.72823	8	0.239203	4.51636	5	0.100775	0.180959	0.74242	0.658535
FT552	FT552	373.545	646.876			646.874	646.878	372.653	374.956	25	470;1215;1947;2699;3484;4388;5205;6077;7024;7911;8667;9335;10082;10813;11530;12831;13605;14256;14983;15770;16561;17393;18070;18820;19535	59.01431;156.5146;156.9909;254.968;351.8643;352.9451;450.9218;548.8988|59169.9790988379;2478.17253764488;662988.454844471;135762.508830549;919.05602563163;317852.586295527;140338.580696886;21258.0036343982	1	-0.0597167	0.00186384	0.00465103	0.00694629	0.00174619	0.0142906	5.90658	6	0.893688	5.997	6	0.919158	5.64504	5	0.839424	5.84951	6	0.883721	#NUM!	0		5.77581	11	0.870432	5.92326	12	0.903654	5.95179	12	0.909192	5.74728	11	0.868217	0.181554	0.740993	0.658535
FT341	FT341	34.3225	422.229	LysoPE(0:0/14:1(9Z));LysoPE(14:1(9Z)/0:0);NCGC00380312-01_C2		422.228	422.231	33.1608	35.6732	20	284;1048;1774;2510;3287;4131;5850;6816;7687;8505;10652;11369;12026;12649;13429;15577;16377;17209;17946;19388		0	-0.0109045	0.0403262	-0.0113873	-0.128353	-0.0708015	-0.0612285	5.50703	5	0.758583	5.00452	4	0.462901	5.40616	4	0.735327	5.23053	5	0.61794	#NUM!	0		5.4566	9	0.760797	5.11753	9	0.545958	5.25578	9	0.627907	5.31834	9	0.688815	0.181845	0.740299	0.658535
FT673	FT673	247.088	763.519	DG(11D3/11D5/0:0);DG(11D5/11D3/0:0);DG(11D5/9D5/0:0)		763.516	763.531	246.169	259.599	13	572;1313;3587;4526;7133;8025;10182;10909;11622;13699;16673;18148;18915		0	-0.0393516	-0.0270855	0.0288554	0.0172789	-0.0641326	-0.0186334	4.944	2	0.398671	5.1846	4	0.596899	4.9806	2	0.477298	5.04692	3	0.499446	#NUM!	0		4.9623	4	0.427464	5.11576	7	0.54485	5.0643	6	0.499446	5.01376	5	0.48505	0.18218	0.7395	0.658535
FT434	FT434	438.683	516.055	Fenticonazole nitrate;6-(Methylsulfonyl)hexyl glucosinolate		516.053	516.06	437.692	439.415	15	366;1124;1854;2597;3373;4251;7780;8578;9255;9984;10728;12736;15661;17290;19452	78.95892;96.96946;134.0468;150.9798;174.0878;211.0012;346.0555;347.0583;516.0554;516.0933|3489.41898643911;1635.18261820814;845.937750571042;370.489651639016;253.621814008372;1171.89870038;48116.7101687616;2781.79253011191;531.645194552243;1689.98994554488	1	-0.0367803	0.0553829	0.0169158	-0.000690336	0.0628515	-0.021629	4.68871	4	0.203765	4.90903	5	0.389812	4.48226	1	0.0874862	4.69823	3	0.211517	#NUM!	0		4.58549	5	0.138427	4.80363	8	0.292359	4.79887	9	0.277962	4.59025	4	0.153931	0.183853	0.73553	0.659755
FT702	FT702	113.306	773.534	PG(18:0/18:2(9Z,12Z));PG(18:1(11Z)/18:1(11Z));PG(18:1(11Z)/1		773.533	773.535	112.003	118.23	7	4552;5323;6242;10920;12963;16697;18937	152.9953;171.0059;227.0324;255.2322;278.2213;279.2329;280.2365;280.3878;281.2485;282.2528;283.2639;305.2456;306.2514;307.2639;391.2267;415.2279;417.2399;419.2566;489.2592;491.2781;493.2934;507.2676;509.2893;510.2928;511.3041;771.1168;771.1505;772.5256;773.5365;774.5348|1794.57435623637;654.473256262811;241.007045938892;792.614111415449;87.0599556421212;12830.7946382974;1677.97088177966;78.9405100…	1	-0.0345751	-0.0792332	-0.158136	0.0228402	0.0021822	-0.113932	5.5902	3	0.788483	5.06455	1	0.512735	5.09735	1	0.559247	5.33045	2	0.679956	#NUM!	0		5.34377	4	0.689922	5.1975	3	0.603544	5.32737	4	0.678848	5.2139	3	0.620155	0.184013	0.735151	0.659755
FT731	FT731	253.578	793.578			793.576	793.58	250.514	258.719	26	619;1347;2084;2831;3628;4583;5353;6271;7175;8066;8791;9466;10222;10942;11659;12215;12985;13740;14392;15128;15916;16726;17540;18182;18962;19656		0	0.00360971	-0.00426038	-0.00771424	0.0123238	0.0153968	0.027844	5.86736	6	0.882614	5.79134	6	0.878184	5.86575	6	0.900332	5.87741	6	0.891473	#NUM!	0		5.86656	12	0.898117	5.83437	12	0.885936	5.82935	12	0.882614	5.87158	12	0.893688	0.185772	0.731019	0.663366
FT128	FT128	400.91	223.02	Diphenylsulfoxide;Cysteinyl-Cysteine;Ethyl aconitate		223.019	223.021	399.244	401.962	26	109;887;1614;2340;3112;3919;4903;5641;6611;7485;8345;9023;9730;10483;11198;11894;12473;13254;13989;14678;15386;16188;17029;17799;18438;19224	58.8391;59.01465;141.0169|5052.75047847022;1400712.02091789;242589.777170206	1	0.00493999	0.0180451	0.00192427	0.00583874	-0.0068082	-0.010808	6.18183	6	0.941307	6.24568	6	0.955703	6.20841	6	0.96124	6.16713	6	0.945736	#NUM!	0		6.19512	12	0.956811	6.2064	12	0.952381	6.21376	12	0.952381	6.18777	12	0.953488	0.187435	0.72715	0.666602
FT544	FT544	404.604	622.08			622.079	622.082	403.17	405.619	23	457;1207;1939;2691;3474;4373;6065;7010;7897;8658;9328;10071;10803;11522;12126;12821;13596;14976;15758;16551;17379;18807;19527	59.014;88.0401;130.0618;141.0165;170.0429;194.0543;212.0652;223.0198;294.068;305.0227;316.0501;376.071;387.0258;398.0539;458.0741;540.0764;622.0807|4880.18466137334;3821.1437420224;25007.2245084719;99073.4640612881;5959.14990618843;1787.61376608727;115412.634924934;33762.3145951593;32418.9513786769;36465.7857843603;775.993560723205;45980.5873319785;28007.5189641686;1017.82897688096;51977.13634346…	1	-0.0348021	0.0123489	0.0236369	0.00210936	-0.0122625	-0.0411767	5.35144	5	0.666667	5.49363	6	0.751938	5.34412	5	0.707641	5.32279	5	0.673311	#NUM!	0		5.34778	10	0.693245	5.40821	11	0.722038	5.42253	11	0.723145	5.33345	10	0.694352	0.190305	0.72055	0.673521
FT582	FT582	246.652	699.516	DG(11D3/11D3/0:0);DG(11D3/9D5/0:0);DG(11D5/9D3/0:0)		699.514	699.518	243.231	247.728	25	498;1240;1972;2731;3521;4425;5224;6118;7051;7946;8692;10110;10837;11550;12138;12861;13629;14271;15005;15798;16584;17422;18089;18845;19559		0	-0.00152932	-0.042686	-0.0219758	-0.00396033	-0.00383863	0.0391215	5.11277	6	0.507198	4.93397	5	0.410853	5.08153	6	0.547065	5.11484	6	0.545958	#NUM!	0		5.09715	12	0.530454	5.02441	11	0.490587	5.02337	11	0.468439	5.09819	12	0.547065	0.190907	0.719178	0.673521
FT712	FT712	254.473	778.562	PC(16:0/P-18:1(11Z));PC(16:0/P-18:1(9Z));PC(16:1(9Z)/P-18:0)		778.559	778.575	230.385	259.899	22	600;1334;2063;2816;3610;4561;5333;5334;6252;7155;8777;9449;10205;10925;12204;13722;14376;15112;15898;16706;17522;18945	227.2014;241.2173;255.2327;462.2981;466.3287;480.3086;704.5259;704.5603;718.5402;778.5053;778.5621|246.384321180057;3644.06085963874;14194.7165158375;200.916242858682;196.336617616828;1019.04317867893;18059.2232212574;1907.56657790572;17764.2098298323;1812.15949744859;30598.6062193609	1	0.0193313	-0.021418	-0.0112817	-0.00915792	-0.0262224	-0.0487838	5.16511	6	0.554817	5.04588	5	0.500554	5.18321	4	0.613511	5.08665	4	0.527132	#NUM!	0		5.17416	10	0.586932	5.06627	9	0.518272	5.1055	11	0.52381	5.13493	8	0.576966	0.197499	0.704435	0.687272
FT065	FT065	60.0775	157.123	STD_Nonanoic acid;Oenanthic ether;xi-2-Ethylheptanoic acid	+	157.123	157.124	57.9473	60.8601	24	59;839;1550;2283;3052;3850;4852;5580;6549;7418;8301;8979;10432;11140;11852;12417;13939;14629;15325;16136;16976;17756;18383;19179	157.1232|4436.32271770819	1	0.0236879	0.0136745	-0.032144	0.00641027	0.02085	0.0261003	5.31347	6	0.644518	5.15764	5	0.572536	5.26819	5	0.658915	5.24524	6	0.6268	#NUM!	0		5.29083	11	0.658915	5.20144	11	0.605759	5.23555	11	0.615725	5.25672	11	0.648948	0.197634	0.704138	0.687272
FT336	FT336	459.622	420.017	MMV000858		420.015	420.017	458.912	460.702	4	1770;2505;3282;7683	78.95824;96.95943;96.96957;138.9797;211.0004;322.045|196.737858918485;33.9869959929587;101.551072235759;35.7282434927413;37.9083533412597;1877.21954607171	1	-0.0152245	0.0249767	-0.00757902	-0.00744083	-0.00215189	0.0121097	4.49366	3	0.0830565	4.35408	1	0.0332226	4.30357	0	0.0221484	4.30357	0	0.0232558	#NUM!	0		4.39861	3	0.0365449	4.32882	1	0.0243632	4.42387	4	0.0442968	4.30357	0	0.0232558	0.198015	0.703302	0.687272
FT819	FT819	246.961	867.585	PA(22:5(4Z,7Z,10Z,13Z,16Z)/24:1(15Z));PA(22:5(7Z,10Z,13Z,16Z		867.582	867.593	242.127	249.703	20	697;1423;2904;4671;6369;7258;8150;8858;10301;11012;11728;12274;13065;13821;14472;16808;17630;18261;19052;19721		0	-0.0183714	-0.0385545	0.0375741	-0.0146325	0.0105269	-0.0206881	5.28335	3	0.630122	5.60885	5	0.808416	5.55936	5	0.810631	5.53619	5	0.766334	#NUM!	0		5.42135	8	0.734219	5.57252	10	0.787375	5.4461	8	0.732004	5.54777	10	0.786268	0.198516	0.702205	0.687272
FT795	FT795	66.1031	846.538	PC(17:0/12-HETE)		846.536	846.54	64.9414	67.3767	19	678;1403;2140;3686;4652;5408;6348;7239;8133;10282;10996;11710;13044;13805;15974;16787;17608;19030;19702		0	-0.0456938	-0.0168717	-0.0301423	0.0127248	0.0184067	0.00199148	4.86652	5	0.335548	4.66593	4	0.199336	4.61359	3	0.178295	4.80111	5	0.276855	#NUM!	0		4.74006	8	0.243632	4.73352	9	0.229236	4.76622	9	0.255814	4.70735	8	0.229236	0.198918	0.701327	0.687272
FT620	FT620	70.0634	730.512	PE(16:0/9-HODE)		730.51	730.514	68.9889	72.7666	22	531;1271;2001;2759;4465;5259;6156;7086;7976;8719;10143;10869;11580;12896;13658;14301;15035;15832;16621;17453;18113;19587		0	-0.00144117	-0.039109	-0.0642791	-0.0590382	-0.0361955	0.0783513	5.06411	5	0.47619	4.74945	5	0.249169	4.87061	5	0.3732	4.75987	5	0.248062	#NUM!	0		4.96736	10	0.434109	4.75466	10	0.249169	4.90678	10	0.374308	4.81524	10	0.305648	0.19948	0.7001	0.687272
FT075	FT075	458.852	166.975	STD_Phosphphoenolpyruvat;Oxalacetic acid;2,3-Dihydro-5-methy	+	166.975	166.976	457.974	460.23	20	67;846;2292;3064;3859;4860;5589;6559;7428;8988;9691;10440;11151;11859;13209;13946;14636;15336;16146;18392	62.96403;78.95922|352.650484059162;27095.5761840206	1	0.00567291	-0.00882255	0.00215418	-0.0110052	-0.0668632	-0.0288695	4.81429	5	0.299003	4.9844	5	0.44629	4.96619	5	0.467331	4.73351	3	0.234773	#NUM!	0		4.89024	10	0.365449	4.85895	8	0.316722	4.89934	10	0.366556	4.84985	8	0.333333	0.200403	0.698096	0.687764
FT562	FT562	405.24	663.062	Dictazoline A		663.057	663.065	403.81	406.329	18	480;1223;3496;4398;6085;7034;7926;8671;10091;10822;11536;12841;13613;14989;15780;16570;17402;18829		0	-0.0439091	-0.0311571	0.0208086	0.00877158	-0.0187266	-0.014863	4.69495	3	0.207087	4.86788	5	0.332226	4.79543	4	0.307863	4.80053	4	0.27464	#NUM!	0		4.74519	7	0.246955	4.8342	9	0.307863	4.78142	8	0.265781	4.79798	8	0.295681	0.202956	0.692599	0.69318
FT266	FT266	38.6518	326.188	Penbutolol		326.187	326.188	37.5645	40.202	24	229;992;1725;2451;3225;4048;5006;5769;7610;8448;9135;9846;11306;11983;12587;13367;14084;14786;15509;16316;17139;17895;18555;19329		0	0.0176237	0.00798854	-0.0221467	-0.118892	0.0414365	0.0332592	5.91096	6	0.894795	5.55714	4	0.784053	5.70202	6	0.857143	5.62332	6	0.810631	#NUM!	0		5.80649	12	0.880399	5.59023	10	0.796235	5.73405	10	0.854928	5.66267	12	0.836102	0.203553	0.691323	0.69318
FT903	FT903	559.207	1653.16			1653.16	1653.17	556.573	561.216	16	782;1485;2226;2987;3782;4788;6480;7347;8246;8921;13885;14564;16071;16911;17702;19120	1638.156;1638.486;1646.836;1647.16;1647.496;1647.829;1648.035;1648.166;1648.382;1648.66;1652.487;1652.709;1652.833;1652.922;1653.053;1653.167;1653.268;1653.318;1653.503;1653.644;1653.756;1653.837;1653.95;1654.172|190.80778115549;419.137803900048;427.035811658607;1240.52579947361;826.910253190727;386.157589652566;457.95181038452;129.871568895214;338.372440517696;177.745691182326;225.862811920751;2…	1	-0.058257	1.98085e-05	-0.0018369	-0.0388076	-0.0178172	-0.00177571	5.43663	5	0.719823	5.19249	3	0.606866	5.00596	2	0.491694	5.25979	4	0.642303	#NUM!	0		5.22129	7	0.616833	5.22614	7	0.620155	5.31456	8	0.668882	5.13287	6	0.573643	0.205834	0.686484	0.698251
FT694	FT694	114.395	771.519	PG(16:0/20:3(5Z,8Z,11Z));PG(16:0/20:3(8Z,11Z,14Z));PG(18:0/1		771.518	771.52	112.003	119.532	7	4544;5316;6233;10918;12955;16691;18931	152.9952;171.0058;209.0215;227.0326;255.2322;256.2368;277.2164;278.2206;278.3783;279.2327;280.2369;281.2482;282.2504;283.2643;303.2329;304.236;305.2477;391.2257;415.227;417.2405;465.2585;483.2712;484.2709;485.2777;489.2617;491.277;493.287;507.2731;509.2874;511.2992;515.2757;697.4837;769.139;770.5041;771.5197;772.5207;773.5356|2122.49162883729;629.515431838979;127.795911258994;381.804548508205;238…	1	-0.0388196	-0.0826382	-0.158792	0.0217427	0.00537338	-0.126152	5.59749	3	0.795127	5.08232	1	0.52381	5.09857	1	0.560354	5.35314	2	0.692137	#NUM!	0		5.34803	4	0.694352	5.21773	3	0.613511	5.3399	4	0.685493	5.22585	3	0.6268	0.20909	0.679666	0.699275
FT494	FT494	467.635	566.055			566.05	566.063	466.241	468.735	16	415;1166;1898;2646;3424;4311;5160;6004;6952;7837;8618;9294;10766;11484;12779;15710	78.95887;96.96931;111.0194;138.98;150.9798;158.9251;174.9792;176.9363;192.9903;211.0012;212.0046;241.0117;242.0148;254.0793;260.0246;272.0889;272.9569;273.9604;280.0231;281.0271;304.0598;305.017;306.0213;306.0759;320.9781;321.9815;323.0285;324.0316;384.9837;385.9874;402.9938;403.9979;468.074;564.3042;565.0466;566.052;566.1196|4908.53899178599;2914.03630697928;424.289957728369;682.969354328574;790…	1	-0.061225	0.0636954	-0.0474944	-0.0408872	-0.0430879	0.0251523	5.70784	6	0.839424	5.50796	5	0.76412	5.06571	2	0.530454	4.99145	1	0.454042	#NUM!	0		5.38678	8	0.715393	5.2497	6	0.642303	5.6079	11	0.803987	5.02858	3	0.497231	0.210843	0.67604	0.699275
FT183	FT183	62.8178	271.102	ANGOLENSIN (R);1-(2,6-Dihydroxy-4-methoxyphenyl)-3-phenyl-1-	+	271.098	271.104	45.6394	63.6263	23	158;1667;2384;3158;5691;6669;7533;8384;9076;9777;9778;10533;11239;11933;12518;13297;14025;14720;15433;16239;17077;17835;18485	120.0246;166.0659;173.0517;194.072;199.0551;207.0623;208.0638;214.0784;225.222;227.073;235.0625;236.07;251.0936;253.2169;271.1;271.2277|958.103822844905;2753.90460815106;3070.19169700612;1250.36486812551;5472.77018493341;1374.31522253689;3485.47327325143;7161.11337742776;2242.83130559082;5531.16833791736;876.596893561378;8941.44947118841;7015.6180366652;995.77668347208;80080.8203640141;36463.7096…	1	-0.000221868	0.0099334	0.0161583	0.0378548	-0.0149686	0.013142	4.87083	4	0.341085	5.07932	6	0.520487	5.05655	6	0.521595	5.00315	5	0.465116	#NUM!	0		4.96369	10	0.430786	5.04124	11	0.499446	4.97508	10	0.427464	5.02985	11	0.499446	0.21106	0.675593	0.699275
FT324	FT324	119.111	407.256	DG(8:0/10:0/0:0);DG(8:0/0:0/10:0);DG(10:0/8:0/0:0)		407.255	407.256	114.484	121.834	18	272;1762;3271;4117;5047;5836;6801;7671;11355;12633;14120;14832;15564;16363;17193;17936;18609;19375	78.95914;110.9847;167.0113;239.2376;407.2564|1475.164381654;1578.35013962593;3628.55027741523;4733.05137051519;17574.1823344984	1	-0.021808	-0.037921	-0.0186251	0.0388961	0.035242	0.0290221	4.73389	5	0.24474	4.52966	2	0.100775	4.68352	4	0.223699	4.9177	6	0.387597	#NUM!	0		4.70871	9	0.222591	4.72368	8	0.224806	4.63178	7	0.160576	4.80061	10	0.296788	0.211372	0.674953	0.699275
FT585	FT585	400.347	701.023	6-{6-carboxy-2-[3,4-dihydroxy-5-(3,4,5-trihydroxybenzoyloxy)		701.021	701.025	399.277	401.694	24	500;1242;1974;2733;3523;4427;5226;6120;7053;7948;8694;9372;10112;10839;11552;12863;13631;14273;15007;15800;16586;17424;18847;19561	59.0141;127.001;141.0166;209.0041;223.0196;291.0071;305.0229;373.0104;387.0257;455.0134;469.029;537.0165;551.0313;619.019;633.0345;701.0231|878.34333542432;15949.1394003563;38089.0446291761;10755.4861242068;15458.9053517192;26610.0054095388;25347.478494109;35992.4967406345;23077.6962434135;17132.0894802943;7397.11776276907;20523.6538865777;5566.15072349475;7366.57986874392;1084.46295828935;3516.5…	1	-0.0381384	0.0059211	-0.0209336	0.0227284	0.0121545	0.0213327	5.66911	6	0.826135	5.73567	6	0.856035	5.56367	5	0.813953	5.52537	5	0.76412	#NUM!	0		5.61639	11	0.821705	5.63052	11	0.816168	5.70239	12	0.848283	5.54452	10	0.785161	0.212283	0.673084	0.699275
FT818	FT818	247.088	866.582	PS(16:0/24:1(15Z));PS(16:1(9Z)/24:0);PS(18:0/22:1(13Z))		866.579	866.59	242.127	249.703	21	695;1421;2903;4669;6367;7257;8148;8857;10299;11010;11727;12273;13064;13819;14471;15193;16806;17628;18260;19050;19720	92.02507;135.031;253.2173;255.2327;279.2325;281.2482;283.2638;301.2172;303.2328;305.2475;329.2484;480.3082;506.3264;716.5248;791.5465;792.5571;807.5181;863.9108;866.4698;866.5846;867.5839|2387.40804526119;159734.37651868;3636.48324496237;5789.13948755824;2118.32167943113;8483.68228268858;666.159254716752;1859.82034145225;22944.8278877266;2116.37763380975;8242.35823217138;828.701690673122;3146.728…	1	-0.0108036	-0.0832455	0.0543031	-0.014827	0.0332502	-0.0265196	5.42304	3	0.713178	5.83917	5	0.888151	5.98448	6	0.925803	5.76567	5	0.853821	#NUM!	0		5.70376	9	0.850498	5.80242	10	0.878184	5.6311	8	0.817276	5.87508	11	0.895903	0.213403	0.6708	0.699275
FT574	FT574	255.618	690.507	PC(14:0/15:0);PC(15:0/14:0);PE(14:0/18:0)		690.506	690.509	253.138	261.082	25	491;1233;1966;2722;3512;4413;5218;6103;7045;7937;8684;9360;10103;10831;11546;12853;13623;14267;14997;15789;16577;17412;18083;18838;19552	227.2014;255.2327;452.2778;480.3083;690.5087|23084.4336635379;19603.1264162122;587.22957238557;1466.44953497317;50680.8478159292	1	-0.016393	-0.0015099	-0.0111121	0.00857985	-0.000925	0.0343592	5.08586	6	0.491694	5.0238	6	0.478405	4.9816	5	0.478405	4.99182	6	0.456257	#NUM!	0		5.03373	11	0.483942	5.00781	12	0.472868	5.05483	12	0.492802	4.98671	11	0.468439	0.213567	0.670467	0.699275
FT715	FT715	400.108	783.026			783.024	783.029	399.277	401.03	22	604;1336;2069;2819;3615;4567;5341;6259;7159;8051;8780;9452;10209;10928;11648;12969;13728;15903;16709;17524;18947;19646	127.0007;141.0164;209.004;223.0198;291.0073;305.0233;373.01;387.0252;455.0131;469.0287;537.0167;551.0323;619.0201;633.0366;701.0235;715.0369;783.0289|4567.57807747976;12443.4200395231;3369.91414735019;6426.78583624934;12303.2645987193;13339.6477139438;12018.0439123207;10105.3080529414;11970.3952217226;7403.65285299404;7512.73738578167;2802.50390703384;11061.300802514;2850.77266153729;3584.6823596…	1	-0.0468914	0.0296066	-0.0106944	0.0146568	0.00849489	-0.00285995	5.47202	6	0.743079	5.54223	6	0.778516	5.19319	3	0.623477	5.35841	5	0.696567	#NUM!	0		5.33261	9	0.684385	5.45032	11	0.743079	5.50713	12	0.765227	5.2758	8	0.6567	0.21577	0.666009	0.699275
FT668	FT668	247.088	762.517	PE(18:1(11Z)/P-18:1(11Z));PE(18:1(11Z)/P-18:1(9Z));PE(18:1(9	+	762.515	762.528	246.169	259.599	15	569;1310;3582;4522;7129;8020;10178;10906;11618;12940;13695;16670;17488;18144;18912	140.0111;196.0377;225.1858;227.2014;253.2169;255.2324;257.2268;259.2433;279.2326;281.2484;283.2426;301.2169;303.2329;327.2328;329.2485;434.2656;452.2761;460.2841;476.2772;478.2921;688.4922;688.5442;690.508;744.5287;762.5114;762.5931;764.5261|399.776124787161;447.116918627282;357.720580346411;8135.51264582039;11123.7664031254;3595.66307782059;1505.66782916193;447.751508630046;4262.42730725533;6590…	1	-0.0669858	-0.0346479	0.039171	0.0612359	-0.0412098	-0.0213073	5.12746	2	0.520487	5.44293	4	0.727575	5.28679	3	0.671096	5.40296	4	0.718715	#NUM!	0		5.20713	5	0.609081	5.42295	8	0.724252	5.28519	6	0.650055	5.34488	7	0.700997	0.217875	0.661793	0.699275
FT114	FT114	90.9405	210.008	6-Ethoxy-2-mercaptobenzothiazole;Tricyclazole		210.007	210.009	88.6445	109.391	25	98;878;1603;2328;3099;3100;3905;3906;4893;5628;6599;7472;7473;9720;10473;12463;13244;13976;14668;15377;16178;17020;17788;18425;19215	79.95724;80.96511;106.9805;108.9965;149.9864;210.0077|10671.9355641845;4383.95408665308;2533.17811709507;448.164971074546;9401.41471516287;13277.2454183046	1	-0.102376	-0.0111427	-0.0460487	0.00991323	-0.10012	-0.0180956	5.73824	6	0.850498	5.37647	4	0.700997	5.18773	4	0.619048	5.32381	6	0.674419	#NUM!	0		5.46299	10	0.76412	5.35014	10	0.689922	5.55735	10	0.784053	5.25577	10	0.647841	0.217882	0.661779	0.699275
FT020	FT020	105.345	112.023	2,4-Dimethylthiazole;2,5-Dimethylthiazole;4,5-Dimethylthiazo		112.023	112.023	99.7698	108.727	21	17;800;3805;4806;5538;6502;7368;8263;9647;10393;11098;12373;13165;13901;14587;15282;16090;16932;17720;18342;19137		0	-0.00343616	-0.0502858	0.0203773	0.00633102	-0.00629145	0.0358164	4.62071	3	0.159468	4.77163	5	0.262458	4.86785	5	0.369878	4.8978	6	0.369878	#NUM!	0		4.74428	8	0.245847	4.83472	11	0.30897	4.69617	8	0.211517	4.88283	11	0.378738	0.218137	0.661271	0.699275
FT084	FT084	554.106	173.104	Arginine;STD_L-Arginine;D-Arginine	+	173.104	173.104	551.522	556.608	21	853;1569;3069;3868;5596;6567;7435;8316;9698;10448;11157;12434;13216;13952;14641;15344;16152;16991;17769;18398;19193	131.0824;136.9364|13218.5529813227;4508.67042746996	1	-0.030786	-0.0365888	0.0270107	0.041719	0.00352138	0.00934133	4.75995	4	0.260244	4.93617	5	0.414175	4.93487	5	0.44186	5.02713	6	0.482835	#NUM!	0		4.84741	9	0.335548	4.98165	11	0.454042	4.84806	9	0.328904	4.981	11	0.460687	0.218443	0.660662	0.699275
FT076	FT076	500.788	166.975	STD_Phosphphoenolpyruvat;Oxalacetic acid;2,3-Dihydro-5-methy		166.975	166.975	499.009	502.568	2	8987;10441		0	0.0062189	0.0301782	0.00602498	0.0122963	0.011529	-0.0344468	4.56673	0	0.126246	4.79571	2	0.282392	4.56673	0	0.143965	4.56673	0	0.139535	#NUM!	0		4.56673	0	0.118494	4.68122	2	0.200443	4.68122	2	0.197121	4.56673	0	0.135105	0.221913	0.653818	0.699275
FT728	FT728	253.578	792.574	PE(20:0/P-18:1(11Z));PE(20:0/P-18:1(9Z));PE(20:1(11Z)/P-18:0	+	792.573	792.577	250.514	258.719	26	617;1346;2082;2829;3625;4581;5351;6269;7173;8064;8789;9465;10220;10941;11657;12214;12982;13738;14389;15125;15914;16723;17537;18179;18959;19653	59.01402;87.00849;168.043;224.069;227.2016;253.2171;254.2204;254.4534;255.233;256.236;257.2385;279.2324;281.2483;282.2516;283.2631;329.2483;331.2636;391.2255;462.2986;480.3086;481.3142;647.4686;690.5075;716.3246;716.5236;717.5276;718.5403;719.5455;733.5024;742.5407;790.1278;792.5754|2683.36607737911;2575.51757224044;2868.28343175599;2443.01227227518;2067.71739548972;7293.72024621494;5884.58128107…	1	0.00316232	-0.00343131	-0.00655461	0.0136798	0.0160036	0.0284087	6.19352	6	0.944629	6.12034	6	0.944629	6.18846	6	0.955703	6.20913	6	0.950166	#NUM!	0		6.19099	12	0.953488	6.16473	12	0.946844	6.15693	12	0.943522	6.1988	12	0.959025	0.223548	0.650629	0.699275
FT327	FT327	406.352	416.052	Celecoxib;Metsulfuron-methyl;Gonyautoxin II		416.05	416.053	405.146	407.266	26	275;1039;1765;2498;3274;4120;5049;5840;6806;7675;8496;9177;9898;10645;11358;12022;12637;13419;14122;14834;15567;16366;17197;17938;18612;19378	59.01414;88.04034;141.0166;170.0433;223.0196;252.0466;305.0229;334.0495|13427.5033182311;47104.3156957037;39579.9572679285;123519.915757472;2418.53482689105;11127.4419047744;345.391676576028;5287.79429194089	1	-0.0328568	-0.0110712	0.0157068	0.0108753	-0.00116522	-0.00776283	5.36318	6	0.676633	5.46013	6	0.737542	5.37229	6	0.72093	5.44991	6	0.736434	#NUM!	0		5.36774	12	0.702104	5.45502	12	0.745293	5.41166	12	0.717608	5.4111	12	0.726467	0.223904	0.649937	0.699275
FT049	FT049	401.036	143.021	Niacinamide;2-Acetylpyrazine		143.02	143.021	399.244	401.962	24	42;825;1534;2270;3035;3835;4838;5564;6532;7401;8290;8967;9674;10419;11127;11841;12400;13191;13927;15308;16119;17745;18370;19165		0	0.00423613	0.0242881	-0.00279748	-0.00177513	-0.0260376	-0.00619193	4.62148	6	0.160576	4.67408	6	0.203765	4.61053	5	0.17608	4.56033	5	0.131783	#NUM!	0		4.61601	11	0.159468	4.6172	11	0.158361	4.64778	12	0.17165	4.58543	10	0.149502	0.225401	0.647044	0.699275
FT018	FT018	105.317	111.02	Uracil;4-Carboxypyrazole;Propylene glycol	+	111.02	111.021	99.7698	108.727	26	16;799;1503;2245;3005;3804;4805;5537;6501;7367;8262;8936;9646;10392;11097;11814;12372;13164;13900;14586;15281;16089;16931;17719;18341;19136	68.01416;111.0197|1132.48072481312;21549.1138472551	1	0.00607144	-0.0417473	0.0201214	-0.00152337	-0.0102327	0.0235171	5.94817	6	0.904762	6.07691	6	0.934662	6.20845	6	0.962348	6.19189	6	0.949059	#NUM!	0		6.07831	12	0.937984	6.1344	12	0.940199	6.01254	12	0.924695	6.20017	12	0.960133	0.226945	0.644079	0.699275
FT628	FT628	247.894	738.508	PE(16:1e/8-HETE);PE(16:1e/12-HETE);PE(16:1e/15-HETE)	+	738.507	738.51	244.432	249.908	24	538;1278;2009;2765;3557;4476;5266;6166;7096;7984;8726;10149;10874;11589;12905;13664;14308;15042;15839;16626;17459;18121;18882;19593	140.0115;196.0374;205.1951;253.2169;255.2331;259.2432;277.2172;279.2327;281.2482;285.223;301.2167;302.2195;302.3067;303.2333;304.2364;305.2474;319.2275;434.267;436.2828;452.2785;476.2771;478.2918;482.268;500.2771;664.4875;688.4878;736.2308;738.5102;739.5125;740.5253|1678.71801529646;1669.71929096652;738.419595125571;429.679820195445;36931.5438227475;5945.69832703701;8417.87120132892;16787.9279915…	1	-0.0317917	-0.0556548	-0.0432675	0.0112271	-0.0074114	0.0794437	5.91281	6	0.89701	5.68554	5	0.836102	5.83551	5	0.894795	5.85427	6	0.887043	#NUM!	0		5.87416	11	0.900332	5.7699	11	0.866002	5.79917	11	0.873754	5.84489	11	0.888151	0.227579	0.642867	0.699275
FT464	FT464	404.663	540.077	Ceforanide;Cyanidin 3-O-(6''-malonyl-arabinoside);5-[(6-{[(2		540.075	540.078	403.17	405.935	25	392;1147;1878;2623;3399;4282;5980;6930;7808;8598;9276;10009;10752;11463;12090;12759;13530;14201;14919;15687;16491;17314;18016;18735;19473	59.01404;88.04007;112.0513;130.0618;141.0165;170.043;194.0546;212.0651;223.0196;294.068;305.0228;376.0708;458.0743;540.0767|15105.8078899793;20595.2625965066;962.269175517996;75490.4917709571;143625.445187423;16555.6375523056;3940.04038836376;226978.192864421;22000.0969942708;39548.7976571551;25864.5311018976;65466.4387461281;27282.8392758818;5314.57623891079	1	-0.0211882	0.00914336	0.0283501	0.00299262	-0.00896666	-0.0174108	5.38745	5	0.688815	5.52505	6	0.771872	5.44169	6	0.75526	5.44982	6	0.735327	#NUM!	0		5.41457	11	0.732004	5.48743	12	0.758583	5.45625	11	0.739756	5.44576	12	0.744186	0.228173	0.641736	0.699275
FT772	FT772	405.139	826.068			826.066	826.071	403.81	406.049	14	654;1379;3667;6319;7218;8105;10256;10973;11690;13022;13778;15954;16761;17580	141.0166;170.0429;223.0212;252.0457;305.0219;334.048;387.0276;416.0542;469.0273;498.0522;551.0295;580.0575;633.0556;662.0571;744.0663;826.0644|173.613377293213;181.681054990113;65.3746476220761;123.849925138546;139.186142828893;285.161982834984;173.898017134391;320.532894951694;102.40228856764;322.519899133044;39.5229429572282;201.402226243925;33.8901712364986;332.498156266672;135.484509299886;11…	1	-0.049605	-0.00895798	0.0220589	0.012176	-0.0348296	-0.0165619	4.82701	2	0.303433	5.05055	4	0.503876	4.92048	3	0.429679	4.92852	3	0.399779	#NUM!	0		4.87375	5	0.346622	4.98953	7	0.461794	4.93878	6	0.398671	4.9245	6	0.414175	0.228798	0.640547	0.699275
FT415	FT415	289.788	500.277	STD_Glycocholic acid;STD_Glycohyocholic acid;STD_18:1 Lyso P		500.277	500.278	287.103	291.597	21	351;1108;1837;2580;3355;4227;5931;6887;7762;8568;9242;9970;10711;11433;12072;12718;13496;15645;16446;17278;18694	140.0104;196.0378;214.0489;259.2433;303.233;500.2782|349.638904661512;2385.57694758293;518.113317899861;2000.87519915391;27062.1664695673;22546.0143405477	1	-0.0381779	0.0234655	0.0064197	0.00859838	-0.0163649	-0.0187636	5.21399	5	0.586932	5.32654	6	0.678848	5.12682	4	0.578073	5.14098	4	0.559247	#NUM!	0		5.17041	9	0.580288	5.23376	10	0.6268	5.27027	11	0.634551	5.1339	8	0.575858	0.229825	0.638602	0.699275
FT631	FT631	247.921	739.511	PA(14:0/22:0);PA(16:0/20:0);PA(20:0/16:0)		739.51	739.513	246.727	249.296	12	541;1280;4479;5268;6169;7988;11591;12908;14311;15046;15842;16630		0	-0.000107429	-0.0690415	-0.0858333	-0.014273	-0.0168294	0.0471862	5.29427	3	0.634551	5.00782	1	0.466224	5.44767	4	0.758583	5.15036	2	0.568106	#NUM!	0		5.37097	7	0.705426	5.07909	3	0.522702	5.15104	4	0.55371	5.29902	6	0.681063	0.231801	0.634884	0.699275
FT274	FT274	406.398	334.049	Avenanthramide 1c;(Z)-N-Coumaroyl-5-hydroxyanthranilic acid;		334.048	334.05	405.146	408.396	26	236;998;1729;2458;3232;4058;5009;5779;6753;7618;8455;9142;9855;10604;11313;11988;12594;13374;14089;14795;15517;16324;17148;17901;18563;19336	59.01398;88.04028;141.0163;170.0432;252.0467|11377.9001798428;55270.4580262011;9844.56029542327;48085.7773894809;449.067590668517	1	-0.0320914	-0.0100251	0.015563	0.010042	0.000858413	-0.00657195	5.26899	6	0.621262	5.36287	6	0.693245	5.27654	6	0.663344	5.35546	6	0.694352	#NUM!	0		5.27277	12	0.65227	5.35916	12	0.697674	5.31593	12	0.669989	5.316	12	0.687708	0.232325	0.633904	0.699275
FT002	FT002	56.3083	61.9898	Peroxynitrite		61.9892	61.9919	55.3285	57.8217	19	1488;2229;2990;3785;4791;5521;6482;7350;8249;8923;9631;11081;13887;14570;15266;16073;16915;17705;18325		0	-0.0350757	-0.00523085	-0.0404443	-0.0308293	0.0350003	0.171986	6.66659	6	0.986711	6.2998	5	0.966777	5.73321	3	0.86711	6.21076	5	0.951274	#NUM!	0		6.1999	9	0.959025	6.25528	10	0.963455	6.48319	11	0.977852	5.97198	8	0.921373	0.233505	0.631703	0.699275
FT355	FT355	41.6045	441.107	5-hydroxy-8-(hydroxymethyl)-8-methyl-6-(2-methylpropanoyl)-4		441.105	441.253	37.8833	42.7213	21	1061;1788;2526;3300;4152;5065;5865;6835;8516;9919;10667;11382;12036;12665;13444;14139;14857;15593;16392;17959;19403	96.96002;134.9573;150.9884;159.0843;178.9295;208.9756;219.0508;225.0075;266.9635;277.0383;282.9946;291.0904;293.0703;311.1665;326.967;335.0261;340.9821;351.0566;357.0135;359.1556;409.0449;423.0992;423.7705;425.0766;439.8988;441.1076;441.1783;441.2527;441.3727|14311.661185611;807.811543697404;2823.49426221036;4341.81160196697;381.180867483879;12639.0327707377;3214.16089193878;26714.671169457;3564.…	1	0.0334289	-0.0132505	-0.021829	-0.0351729	-0.0116907	0.0121458	5.51904	6	0.75969	5.29944	4	0.664452	5.59776	6	0.820598	5.33178	4	0.681063	#NUM!	0		5.5584	12	0.79402	5.31561	8	0.676633	5.40924	10	0.715393	5.46477	10	0.75526	0.234479	0.629896	0.699275
FT475	FT475	436.914	554.075	NCGC00380406-01!3-[(2,3,4a,8,12b-pentahydroxy-3-methyl-1,7,1		554.071	554.077	434.913	438.589	11	402;1156;1885;2633;3408;4296;7821;10019;12766;15698;17324	75.00866;78.95878;96.96903;134.0467;135.0294;163.0241;207.0143;211.0007;246.0444;316.0826;346.0554;382.0987;554.0756;554.1295;554.1518|1252.78020904491;1932.97037662344;536.632480505622;526.407615634371;35712.247174193;583.208526564846;15591.5466258813;877.091270169234;175.847429859409;169.125635104479;34224.6074377821;997.496391953374;1045.62362752259;687.651020977523;249.699259137151	1	-0.0485134	0.0440581	-0.0144853	-0.00907723	0.0115924	0.0231141	5.14206	4	0.534884	4.90566	2	0.385382	4.81718	1	0.327796	4.8591	2	0.324474	#NUM!	0		4.97962	5	0.44629	4.88238	4	0.34773	5.02386	6	0.470653	4.83814	3	0.323367	0.235162	0.628633	0.699275
FT604	FT604	253.705	718.537	PC(15:0/16:0);PC(16:0/15:0);PE(14:0/20:0)		718.535	718.539	250.514	258.719	26	518;1258;1991;2748;3540;4448;5243;6140;7073;7964;8707;9390;10130;10856;11568;12148;12883;13645;14288;15020;15819;16605;17439;18101;18862;19575	168.0425;253.2177;254.2215;255.2326;256.2357;257.2379;281.2481;282.2506;283.2566;462.2997;480.3081;718.5394|268.184752047618;649.488184715646;457.03991872869;49748.6846945234;828.530914528591;278.141448450583;1034.38505125584;1380.85088798018;564.492414807475;890.095903394436;2612.79729974606;71144.2952105411	1	0.00731074	-0.00165413	-0.0133039	0.0108599	0.0161309	0.0242841	5.30768	6	0.638981	5.22089	6	0.625692	5.29967	6	0.679956	5.29452	6	0.662237	#NUM!	0		5.30367	12	0.663344	5.25771	12	0.648948	5.26429	12	0.632337	5.29709	12	0.679956	0.23779	0.623806	0.699275
FT249	FT249	39.5383	312.171	Venlafaxine;Venlafaxine;Venlafaxine		312.169	312.177	38.3028	40.4447	25	214;980;1713;2439;3210;4032;4994;5752;7596;8435;9125;9831;10585;11293;11974;12572;13355;14074;14771;15494;16301;17125;17883;18541;19314	98.95572;119.0508;183.0116;184.0149;248.2108;312.173|231.832101520082;56.0310732078449;749.748466102626;870.56651602998;55.7048800898372;5276.79997180959	1	0.0164079	0.00923772	-0.021826	-0.107674	0.0328142	0.00502351	5.83505	6	0.877076	5.56582	5	0.787375	5.65152	6	0.841639	5.58348	6	0.787375	#NUM!	0		5.74329	12	0.860465	5.57465	11	0.78959	5.70044	11	0.847176	5.6175	12	0.827243	0.241726	0.616677	0.699275
FT536	FT536	371.839	615.891			615.889	615.892	370.68	372.874	14	451;2684;4365;6056;7002;7888;8651;10064;10798;11515;14969;15751;16544;18800		0	-0.032105	-0.0190519	0.0032469	-0.0170545	-0.0196833	-0.0114294	4.88688	3	0.362126	5.05788	5	0.507198	4.7694	2	0.282392	4.85967	3	0.325581	#NUM!	0		4.82814	5	0.323367	4.95877	8	0.424142	4.97238	8	0.424142	4.81453	5	0.30454	0.24209	0.616023	0.699275
FT388	FT388	35.5956	473.283	Pubescenol		473.276	473.284	34.5385	36.8771	13	328;1819;3334;4195;10694;12057;12700;14877;15625;16423;17982;18669;19430	205.1594;267.1146;443.2354;457.2512;458.2576;471.8274;473.2828|8730.94432945961;693.675305542439;570.694853171346;10700.5410662095;1640.83988753505;1155.68531838891;296400.15383588	1	0.00704519	-0.00314196	-0.0113333	0.042038	0.0129188	-0.0202248	4.92627	3	0.38206	4.7817	1	0.27464	4.95843	3	0.458472	5.0815	5	0.51938	#NUM!	0		4.94235	6	0.40753	4.9316	6	0.394241	4.85399	4	0.333333	5.01997	8	0.491694	0.242429	0.615416	0.699275
FT361	FT361	446.288	446.018	Carboxycelecoxib;Thiamine pyrophosphate;Glucosinalbin		446.01	446.151	432.795	448.689	20	300;301;1065;1792;2531;3305;4157;4158;5872;6842;7712;8521;9923;10672;11386;12671;13448;17229;18643;19408	74.02478;89.0242;101.0243;104.0351;161.0451;179.0555;221.0663;263.0776;281.0871;341.1089;446.1496|870.611906064603;251.397841722329;459.105536001356;5435.68114718569;2299.49480948662;1314.2346739718;2158.5194635157;418.508470866348;433.772595932328;206.790247919071;456.986311364369	1	-0.060271	0.0131958	-0.00474801	-0.0276356	0.0322498	0.0320304	4.93618	5	0.392027	4.73927	5	0.24474	4.71334	3	0.24474	4.62455	3	0.179402	#NUM!	0		4.82476	8	0.320044	4.68191	8	0.202658	4.83773	10	0.314507	4.66894	6	0.20155	0.242635	0.615047	0.699275
FT478	FT478	435.86	556.165			556.163	556.165	434.185	436.661	11	1158;4300;5150;5994;8608;11473;12098;13543;14210;14932;18022	78.95912;140.0116;152.9954;171.0061;213.3964;214.049;556.1647|11450.579834741;79400.5360538611;32792.0520348184;2605.58089205555;2495.11032802209;708157.773082148;14834.0621655627	1	0.0799726	-0.0427978	-0.0283712	-0.0781878	-0.0367226	0.0918766	5.27963	3	0.627907	5.0004	1	0.460687	5.62134	5	0.831672	5.03172	1	0.486157	#NUM!	0		5.45048	8	0.751938	5.01606	2	0.481728	5.14002	4	0.547065	5.32653	6	0.692137	0.247094	0.607137	0.699275
FT689	FT689	69.5604	770.507	PE(20:4(5Z,8Z,11Z,14Z)/P-18:1(11Z));PE(20:4(5Z,8Z,11Z,14Z)/P		770.505	770.51	67.0207	72.7666	16	585;2051;2806;3598;4540;6229;7142;8036;8767;10194;15095;16687;17506;18159;18928;19634		0	-0.0469827	-0.0323074	-0.00273688	-0.0200534	0.102517	-0.0231137	5.47184	5	0.741971	5.2522	4	0.637874	4.98803	1	0.481728	5.51469	5	0.760797	#NUM!	0		5.22993	6	0.627907	5.38344	9	0.709856	5.36202	9	0.693245	5.25136	6	0.646733	0.247152	0.607036	0.699275
FT843	FT843	247.539	893.598	PC(DiMe(11,3)/DiMe(11,5));PC(DiMe(11,5)/DiMe(11,3));PC(DiMe(		893.597	893.601	245.979	250.315	26	716;1443;2171;2922;3724;4702;5441;6390;7279;8172;8875;9557;10321;11029;11749;12292;13084;13845;14493;15210;16009;16832;17652;18280;19070;19740		0	-0.00344081	-0.00933087	-0.00235449	0.00576115	-0.00398892	0.00640682	5.71447	6	0.841639	5.7759	6	0.874862	5.68632	6	0.852713	5.75676	6	0.850498	#NUM!	0		5.70039	12	0.849391	5.76633	12	0.864895	5.74518	12	0.861573	5.72154	12	0.857143	0.248233	0.60514	0.699275
FT055	FT055	555.249	145.098	STD_Lysine;Lysine;2,6-diaminohexanoic acid	+	145.098	145.098	552.885	557.967	20	47;829;1539;3041;3840;5567;6537;7405;8970;9676;10423;11130;12406;13193;14617;15312;16124;16967;18373;19168	145.0979|1534.86121597643	1	-0.0469634	-0.0290922	0.0141259	0.0438403	-0.00971246	-0.034633	5.01103	4	0.44629	5.18477	5	0.598007	5.08933	4	0.551495	5.17746	5	0.584718	#NUM!	0		5.05018	8	0.500554	5.18112	10	0.594684	5.0979	9	0.51938	5.1334	9	0.574751	0.248674	0.604369	0.699275
FT411	FT411	406.234	498.055	Chondroitin 4-sulfate;2-{4-[(6-carboxy-3,4,5-trihydroxyoxan-		498.053	498.056	405.015	407.266	26	349;1106;1835;2578;3353;4223;5110;5929;6885;7760;8566;9241;9967;10709;11431;12070;12716;13494;14177;14891;15642;16444;17276;17992;18690;19442	59.01407;88.04021;141.0166;170.0433;223.0197;252.0464;305.0227;334.0491;387.025;416.0524;498.0571|13781.131205117;40457.0567055905;86000.1690310726;202028.459830309;11624.7743983054;36337.9935259781;8554.65154172921;47216.7049160285;1054.97170830474;14925.9397838456;614.040262613375	1	-0.03491	-0.0123164	0.0176823	0.0103884	-0.00470362	-0.00925928	5.51932	6	0.760797	5.61858	6	0.811739	5.52266	6	0.79402	5.61273	6	0.800664	#NUM!	0		5.52099	12	0.780731	5.61565	12	0.812846	5.56895	12	0.788483	5.56769	12	0.796235	0.248739	0.604255	0.699275
FT549	FT549	104.168	634.382			634.381	634.384	99.7698	108.727	24	467;1212;2696;3482;4383;5202;6073;7020;7908;8665;9331;10079;10810;11528;12130;12828;13602;14981;15767;16558;17389;18068;18816;19532	111.0195;508.3387;634.3839|4932.18075581941;495.390784005758;1383.5236729958	1	-0.0186492	-0.0195923	0.0377236	-0.00928932	-0.000781121	-0.00306248	4.7696	5	0.266888	4.91247	6	0.393134	4.75172	5	0.260244	4.92344	6	0.397564	#NUM!	0		4.76066	10	0.261351	4.91796	12	0.37763	4.84104	11	0.317829	4.83758	11	0.322259	0.249666	0.60264	0.699275
FT517	FT517	321.879	600.323	JSTX-3;Strychnophylline		600.322	600.325	320.847	324.82	26	435;1186;1918;2666;3444;4342;5177;6032;6982;7868;8638;9314;10048;10786;11499;12116;12800;13572;14234;14956;15734;16529;17357;18046;18781;19509		0	-0.0263431	-0.0367526	0.0259231	0.00742763	0.0222915	0.0113991	5.37936	6	0.685493	5.49157	6	0.750831	5.39807	6	0.730897	5.59696	6	0.797342	#NUM!	0		5.38871	12	0.716501	5.54427	12	0.776301	5.43547	12	0.727575	5.49752	12	0.767442	0.251026	0.600281	0.699275
FT070	FT070	350.704	164.072	STD_L-Phenylalanine;3-Pyridinebutanoic acid;Benzocaine	+	164.071	164.072	347.399	355.123	26	63;843;1556;2288;3058;3856;4856;5585;6554;7424;8305;8983;9688;10436;11147;11856;12422;13206;13943;14633;15331;16141;16981;17760;18388;19185	72.00915;103.055;147.0448;164.0713|3513.29475041567;10073.3258307908;10568.2167821406;2223.85869419239	1	-0.0318282	-0.0114829	0.0160777	0.046001	0.00458774	0.00257114	5.32042	6	0.650055	5.43413	6	0.722038	5.37366	6	0.723145	5.51845	6	0.763012	#NUM!	0		5.34704	12	0.692137	5.47629	12	0.754153	5.37728	12	0.703212	5.44605	12	0.745293	0.25304	0.596811	0.699275
FT397	FT397	270.092	483.272	Lucidenic acid M;5,8-Epoxy-5,8-dihydro-3-hydroxy-8'-apo-b,y-		483.271	483.273	267.522	274.414	19	337;1095;1827;3343;4205;5102;5917;6876;7751;9957;10700;11421;12707;13483;14882;15630;16431;17265;18676	152.9957;227.0329;255.2323;483.1122;483.2718|3132.71915271358;686.868427183128;26133.4306343998;457.037674947333;19154.8179014719	1	-0.0552792	-0.0486005	-0.069441	0.0479408	-0.00488063	-0.0452314	5.41035	5	0.708749	5.18239	4	0.59247	5.20158	4	0.6268	5.28676	4	0.655592	#NUM!	0		5.30597	9	0.666667	5.23457	8	0.627907	5.29637	9	0.65227	5.24417	8	0.638981	0.253873	0.595383	0.699275
FT321	FT321	400.411	389.03	3'-O-Methyl-(-)-epicatechin-7-O-sulphate;{6-hydroxy-3-[3-(3-		389.029	389.031	399.244	401.962	26	269;1034;1759;2492;3268;4108;5041;5829;6797;7666;8491;9172;9893;10639;11350;12015;12632;13413;14116;14827;15559;16359;17187;17933;18606;19373		0	0.00533679	0.0203412	0.000453294	0.00578072	-0.0084492	-0.0122145	5.10945	6	0.502769	5.16759	6	0.581395	5.12576	6	0.576966	5.08161	6	0.520487	#NUM!	0		5.11761	12	0.547065	5.1246	12	0.552602	5.13852	12	0.545958	5.10368	12	0.55371	0.254087	0.595018	0.699275
FT234	FT234	400.411	305.023	2-Chloro-6-O-methylnorlichexanthone;4-Chloro-6-O-methylnorli		305.022	305.024	399.244	401.962	26	199;967;1705;2429;3200;4022;4982;5738;6717;7583;8422;9114;9817;10573;11282;11963;12559;13341;14061;14761;15479;16287;17112;17870;18529;19305	58.83898;59.01467;140.5902;141.0172;223.0198|5427.17357412279;1564417.51424876;4755.24901399321;1314394.16993742;16084.6801541032	1	0.004631	0.0198426	0.000174162	0.00693412	-0.00797768	-0.0127193	6.66724	6	0.988926	6.72576	6	0.988926	6.68187	6	0.990033	6.64265	6	0.987818	#NUM!	0		6.67456	12	0.991141	6.68421	12	0.988926	6.6965	12	0.990033	6.66226	12	0.988926	0.254503	0.594307	0.699275
FT619	FT619	406.483	730.049			730.048	730.052	405.146	407.659	16	1270;3552;4464;6155;7085;7975;8718;10142;10868;12895;13657;15034;15831;16620;17452;18876	127.001;141.0167;156.0267;170.043;223.019;238.0318;252.0456;291.0073;305.0241;320.0338;334.0501;373.0089;402.0361;416.0528;455.0114;484.0367;498.0551;566.045;648.0462|201.602144687928;353.891075414917;117.248756200385;631.858519747834;172.444396441936;114.295913334291;213.618488813441;267.831838456121;220.541541347518;287.398048736023;394.532028254369;230.875110693273;564.905234183425;392.6524862…	1	-0.0435729	-0.0379532	0.0251197	-0.00899299	-0.0103951	-0.0284436	4.54212	3	0.10742	4.70559	5	0.225914	4.59348	3	0.163898	4.62627	4	0.180509	#NUM!	0		4.5678	6	0.120709	4.66593	9	0.188261	4.62386	8	0.151717	4.60988	7	0.162791	0.256516	0.590886	0.699275
FT080	FT080	406.872	170.043	6-Methyladenine;1-Methyladenine;3-Methyladenine		170.043	170.044	405.853	408.396	26	70;849;1563;2295;3066;3863;4863;5592;6562;7431;8312;8990;9694;10444;11154;11860;12430;13212;13949;14639;15340;16149;16987;17764;18395;19190	59.01407;88.04038|7454.10348356824;78368.5898427651	1	-0.0247398	-0.00442072	0.0110789	0.00927764	0.00631924	-0.00113431	5.43214	6	0.716501	5.49893	6	0.754153	5.44011	6	0.753045	5.49688	6	0.751938	#NUM!	0		5.43612	12	0.739756	5.49791	12	0.75969	5.46553	12	0.743079	5.4685	12	0.756368	0.256719	0.590543	0.699275
FT892	FT892	237.074	992.6			992.597	992.602	231.598	239.666	24	761;1478;2208;2966;3760;4752;5493;6452;7330;8222;8914;10365;11066;11793;12339;13128;13880;14548;15257;16056;16878;18318;19109;19781	135.031;303.2331;329.248;436.2839;462.2971;746.5154;747.5183;748.5308;749.532;992.6065;992.6808|336.680215431254;4428.39616994565;1535.81671933127;260.241365517732;742.27367492164;200.110904512758;1027.69273804925;49335.7931375204;242.000051877608;4109.48915545976;201.580293088773	1	0.00612739	-0.0337057	-0.0187002	-0.0300494	-0.0365001	0.0196078	5.01808	6	0.452935	4.8706	5	0.336656	5.07406	6	0.538206	4.90383	5	0.372093	#NUM!	0		5.04607	12	0.498339	4.88722	10	0.355482	4.94434	11	0.404208	4.98894	11	0.470653	0.256877	0.590275	0.699275
FT841	FT841	247.35	892.594	PS(18:1(11Z)/24:1(15Z));PS(18:1(9Z)/24:1(15Z));PS(18:2(9Z,12		892.593	892.596	245.979	250.315	26	715;1442;2170;2921;3723;4701;5440;6389;7278;8171;8874;9556;10320;11028;11748;12291;13083;13844;14492;15209;16008;16831;17651;18279;19069;19739	92.02528;135.031;136.0334;255.233;279.2329;281.2483;329.2493;700.5307;742.5412;818.5711;892.4887;892.5962;893.6017|3182.40224525603;209324.317739224;635.595889530056;2067.15757589917;5998.93430965979;1196.50988004374;966.425928904403;1556.54617875887;35017.3495978972;13686.3032890092;1141.37785709987;291496.843006939;1064.49298388125	1	-0.00381653	-0.0101667	-0.00142628	0.00497099	-0.00417298	0.00669463	5.97999	6	0.916944	6.04094	6	0.92691	5.95287	6	0.919158	6.02619	6	0.92691	#NUM!	0		5.96643	12	0.921373	6.03356	12	0.924695	6.01046	12	0.923588	5.98953	12	0.928018	0.258582	0.587401	0.699275
FT827	FT827	287.454	872.54	PE(DiMe(11,3)/DiMe(11,5));PE(DiMe(11,5)/DiMe(11,3));PE(DiMe(		872.535	872.547	286.046	289.345	13	702;2159;2909;4679;5428;8156;8862;11734;12279;14478;15997;18266;19726		0	0.0356997	0.0135848	-0.0106957	-0.0404779	-0.0123378	0.0536077	4.49858	4	0.0863787	4.34477	2	0.0287929	4.48576	3	0.0885936	4.43479	3	0.0719823	#NUM!	0		4.49217	7	0.0775194	4.38978	5	0.0409745	4.42168	6	0.0420819	4.46027	6	0.0775194	0.25883	0.586986	0.699275
FT516	FT516	321.879	599.32	1-Stearoylglycerophosphoinositol;2-Stearoylglycerophosphoino		599.318	599.322	320.847	324.82	26	434;1185;1917;2665;3443;4341;5176;6031;6981;7867;8637;9313;10047;10785;11498;12115;12799;13571;14233;14955;15733;16528;17356;18045;18780;19508	78.95901;96.96917;152.9957;171.0058;223.0008;241.0118;259.022;281.2484;282.2519;282.3995;283.2646;315.0484;333.0592;419.2564;437.2661;597.4778;599.3218;600.3258|4020.66313921643;866.018885176576;74346.1629884056;982.071748270771;5050.15473795231;80353.527234651;2032.76745477001;1600.75639778676;1207.12817465637;700.745005093785;219683.489489495;55968.9414799039;1957.83161857189;26578.5858789012;2…	1	-0.0271928	-0.0373653	0.0261634	0.00758249	0.0228712	0.0115336	5.90339	6	0.889258	6.01504	6	0.921373	5.92048	6	0.909192	6.12277	6	0.939092	#NUM!	0		5.91194	12	0.906977	6.0689	12	0.932447	5.95922	12	0.914729	6.02163	12	0.933555	0.260392	0.584372	0.699275
FT237	FT237	400.518	306.025	Luteolinidin;3,5,7-trihydroxy-2-(4-hydroxyphenyl)-1λ⁴-chrome		306.024	306.026	399.244	401.962	26	202;970;1708;2432;3203;4024;4985;5741;6720;7586;8425;9117;9820;10576;11285;11966;12562;13344;14065;14764;15482;16290;17115;17873;18532;19308		0	0.00485781	0.0187816	0.000118276	0.00622036	-0.00726467	-0.0117454	5.59223	6	0.791805	5.64672	6	0.820598	5.60741	6	0.82392	5.56883	6	0.779623	#NUM!	0		5.59982	12	0.812846	5.60777	12	0.806202	5.61947	12	0.811739	5.58812	12	0.808416	0.266582	0.574168	0.699275
FT666	FT666	47.111	761.577	DG(20:4(5Z,8Z,11Z,14Z)/24:1(15Z)/0:0);DG(20:4(8Z,11Z,14Z,17Z		761.569	761.583	44.9705	48.3945	26	568;1309;2038;2791;3581;4521;5299;6208;7128;8019;8753;9426;10177;10905;11617;12182;12939;13694;14341;15078;15870;16669;17487;18143;18911;19617	78.95867;122.985;168.0426;255.2315;281.2474;449.3159;616.4688;674.4852;685.4264;687.5465;688.548;701.5564;702.5093;761.5207;761.5822|854.027732284043;268.563791781093;11960.5674092933;357.302317509345;435.308303424745;460.389966760238;1036.73632281166;2674.4382768166;1852.82279189496;474083.593015226;1394.62439882891;492.782175851721;3664.53220492483;4024.78913250209;71077.8589194275	1	0.00995075	0.00518202	0.0096791	0.00487862	0.0325289	0.00179748	5.35007	6	0.664452	5.4213	6	0.72093	5.44874	6	0.760797	5.42883	6	0.726467	#NUM!	0		5.39941	12	0.724252	5.42507	12	0.726467	5.38568	12	0.706534	5.43879	12	0.738649	0.26675	0.573896	0.699275
FT262	FT262	458.617	322.044	Cytidine-5'-monophosphate;CMP;3'-CMP	+	322.044	322.045	457.575	459.557	21	225;988;1721;2447;3219;4044;5003;5763;6741;7606;8445;9130;9841;10593;12582;13363;15505;16312;17135;18551;19325	78.95894;96.96902;110.0354;138.9792;150.9803;211.0009;279.0375;322.0456|3699.25277581149;1349.11297773777;80.360533464625;221.398470245082;146.023467662643;226.431831449234;99.843712162658;2921.14451284693	1	-0.0738745	0.0447343	-0.0195932	-0.0169356	0.00921704	-0.0185471	5.09598	6	0.497231	4.94093	6	0.420819	4.56772	2	0.145072	4.76252	5	0.253599	#NUM!	0		4.83185	8	0.325581	4.85173	11	0.314507	5.01846	12	0.462901	4.66512	7	0.200443	0.267527	0.572632	0.699275
FT073	FT073	283.328	166.017	Homocysteinesulfinic acid;N-Acetyltaurine;Thioguanine		166.017	166.018	277.583	286.969	26	65;845;1559;2291;3061;3858;4858;5587;6557;7427;8308;8986;9690;10439;11150;11858;12426;13208;13945;14635;15334;16145;16984;17762;18391;19188	79.95727;80.965;106.9807;124.0071;166.0175|12881.9825535096;431.142573505871;1249.06637237192;480.138124056683;5033.80729694033	1	-0.0251676	-0.00424738	0.00460388	0.0139703	-0.0195167	0.0234251	5.22016	6	0.590255	5.27848	6	0.650055	5.12686	6	0.579181	5.25008	6	0.631229	#NUM!	0		5.17351	12	0.585825	5.26428	12	0.65227	5.24932	12	0.624585	5.18847	12	0.602436	0.269759	0.569023	0.699275
FT792	FT792	247.724	845.609			845.606	845.611	244.459	252.62	24	676;1401;2885;3684;4650;6346;7237;8131;8839;9515;10279;10994;11709;12257;13041;13803;14451;15177;15972;16784;17606;18241;19027;19701		0	0.0198427	0.00930332	0.0355898	-0.0159314	0.0230873	-0.0156195	5.2047	4	0.579181	5.3449	6	0.685493	5.41979	6	0.744186	5.34885	6	0.688815	#NUM!	0		5.31224	10	0.671096	5.34687	12	0.685493	5.2748	10	0.638981	5.38432	12	0.717608	0.276546	0.558233	0.699275
FT563	FT563	515.528	665.215	STACHYOSE;Tetrasaccharides (Hex-Hex-Hex-Hex);Glycogen	+	665.214	665.216	511.9	519.196	26	481;1224;1954;2709;3499;4399;5212;6086;7036;7927;8672;9345;10093;10823;11537;12133;12842;13614;14262;14990;15781;16571;17403;18075;18831;19543	101.0242;143.0345;161.0452;179.0557;221.0665;263.077;281.0875;341.1088;383.1191;425.1297;443.1396;503.1608;545.1719;587.1821;665.2155|2873.08776829051;1437.32262197964;17468.0105647772;17918.634955195;8181.39517712471;1493.11003766568;4030.5117105824;15259.7093119093;17032.391934214;5672.64500672628;1798.73898460607;7027.37660271314;17673.655703783;4503.3400977411;5177.0159687055	1	-0.0338025	0.0140862	-0.00381351	-0.0269306	-0.0131009	0.0669237	5.34583	6	0.660022	5.21665	6	0.623477	5.16163	6	0.601329	5.09403	6	0.530454	#NUM!	0		5.25373	12	0.638981	5.15534	12	0.570321	5.28124	12	0.645626	5.12783	12	0.568106	0.276647	0.558074	0.699275
FT117	FT117	375.961	212.033	N-Lactoyl ethanolamine phosphate;5-Hydroxyindoleacetic acid;		212.032	212.033	375.14	376.956	22	101;881;2332;3103;3910;5632;6602;7477;8337;9723;10474;11188;12466;13246;13980;14672;15380;16181;17022;17791;18429;19217	59.01409;114.0559|418.316319214506;18679.4004994965	1	-0.0339724	-0.0313354	0.0267483	0.0174154	0.000602645	0.00628784	4.64479	4	0.173865	4.78812	5	0.27907	4.78971	5	0.301218	4.89218	6	0.363234	#NUM!	0		4.71725	9	0.229236	4.84015	11	0.311185	4.71646	9	0.231451	4.84095	11	0.325581	0.277035	0.557465	0.699275
FT720	FT720	290.48	787.53	PG(18:1/13-HODE);PG(18:1/9-HODE)		787.528	787.533	288.275	292.352	26	610;1341;2075;2824;3618;4574;5346;6262;7164;8057;8784;9460;10215;10935;11652;12209;12975;13733;14384;15118;15908;16715;17529;18173;18953;19648		0	0.000590502	0.00671047	-0.00131026	0.0031898	-0.0083153	-0.0295849	5.359	6	0.674419	5.4795	6	0.748616	5.32928	6	0.699889	5.37015	6	0.705426	#NUM!	0		5.34414	12	0.69103	5.42483	12	0.72536	5.41925	12	0.719823	5.34972	12	0.703212	0.279825	0.553113	0.699275
FT278	FT278	502.109	338.988	FRUCTOSE 1,6-BIPHOSPHATE;"FRUCTOSE 1,6-BIPHOSPHATE";Fructose	+	338.987	338.989	499.009	503.632	24	239;1002;1731;2460;3235;4065;5011;5785;6757;7626;8458;9144;9859;10609;11316;12597;13379;14091;14798;15519;16329;17150;18568;19338	78.95909;96.96952;138.9798;150.9803;158.9249;162.9807;168.9898;176.9358;180.9899;204.9888;223.0014;241.0117;338.989|7615.75807018211;11333.9664782878;788.334964441447;840.629681586654;2443.85289013088;116.070391098447;409.202096268002;1511.44917401705;67.9534944027921;140.217588354724;320.991361039383;2364.33927456676;2809.32783773799	1	-0.0561604	-0.0209691	0.00692451	-0.00684037	-0.0434449	-0.0611087	5.257	6	0.614618	5.4649	6	0.740864	5.06319	5	0.527132	5.26622	5	0.646733	#NUM!	0		5.16009	11	0.569214	5.36556	11	0.702104	5.36095	12	0.69103	5.1647	10	0.593577	0.28074	0.551695	0.699275
FT507	FT507	406.026	580.058	Celecoxib glucuronide;Adenosine diphosphate ribose;Phosphori		580.056	580.06	405.015	407.266	26	426;1177;1908;2659;3435;4327;5170;6020;6966;7852;8630;9305;10039;10778;11491;12110;12790;13561;14226;14945;15722;16520;17344;18039;18769;19503	59.01394;88.04026;141.0166;170.0433;223.0199;252.0464;305.0228;334.0496;387.0265;416.0526;498.0556;580.06|3321.50731425778;7545.79101586401;46703.3531513477;90081.2815121803;11730.3845772815;25361.0450922454;13256.8338803383;41155.5299583576;6316.30996316586;34308.3079681619;6748.64956309936;1518.95975175241	1	-0.0378591	-0.0174745	0.0193801	0.00982564	-0.00831622	-0.0105126	5.46803	6	0.740864	5.57259	6	0.78959	5.48152	6	0.777409	5.57409	6	0.782946	#NUM!	0		5.47478	12	0.767442	5.57334	12	0.788483	5.52031	12	0.768549	5.52781	12	0.778516	0.281953	0.549823	0.699275
FT377	FT377	404.939	458.074			458.072	458.075	404.047	405.935	25	315;1079;1806;2545;3322;4177;5892;6858;7730;8535;9214;9938;10682;11401;12045;12685;13462;14152;14868;15612;16412;17241;17972;18658;19419	59.01404;88.04013;112.0512;130.0617;130.0863;141.0165;170.0428;194.0544;212.0652;223.0198;294.068;376.0708;458.074|19843.3524910941;57959.8630742587;2877.00616654952;119901.030284206;869.674840063769;101538.24257867;23447.5291382221;5418.34768499093;277549.043011497;10309.9589541506;32523.8742289633;18253.9544247391;1542.31440390892	1	-0.0238826	0.00935052	0.0269561	0.00276122	-0.0056944	-0.0150828	5.41015	5	0.707641	5.53555	6	0.777409	5.44984	6	0.76412	5.46714	6	0.744186	#NUM!	0		5.42999	11	0.737542	5.50134	12	0.760797	5.47285	11	0.746401	5.45849	12	0.750831	0.285154	0.544921	0.699275
FT265	FT265	38.6518	325.185	4-Dodecylbenzenesulfonic Acid;HYDROQUINIDINE;hydroquinidine	+	325.184	325.187	37.3485	40.202	26	228;991;1724;2450;3224;4047;5005;5768;6745;7609;8447;9134;9845;10596;11305;11982;12586;13366;14083;14785;15508;16315;17138;17894;18554;19328	79.95729;117.0343;118.6917;119.0501;133.0654;155.9882;170.004;182.4559;183.0128;183.6931;183.775;183.8535;184.0196;195.0119;196.0195;197.0278;198.0353;211.0432;212.0508;225.0587;226.0665;239.0744;240.0825;253.0899;254.098;261.222;267.1055;268.114;281.1209;295.1366;309.1526;324.1888;324.224;325.1853;325.7019;325.7636;325.8138;325.8508;325.9612;326.0903;326.1435;326.1975;326.2357;326.3048;326.4064;…	1	0.0129657	0.00883861	-0.0160948	-0.107388	0.024515	0.00746354	6.63627	6	0.984496	6.42141	6	0.975637	6.41747	6	0.976744	6.34864	6	0.974529	#NUM!	0		6.52687	12	0.982281	6.38502	12	0.975637	6.52884	12	0.982281	6.38305	12	0.975637	0.285752	0.544011	0.699275
FT319	FT319	400.411	388.028	Tetraphyllin B sulfate;Cyclothiazide;Progoitrin		388.027	388.029	399.244	401.962	26	268;1033;1758;2491;3267;4106;5040;5828;6795;7665;8490;9171;9892;10638;11349;12014;12631;13411;14115;14826;15558;16358;17186;17932;18604;19372		0	0.0049404	0.0208292	-0.000693015	0.00588474	-0.00800874	-0.012614	5.75936	6	0.85825	5.81454	6	0.883721	5.76854	6	0.882614	5.72535	6	0.843854	#NUM!	0		5.76395	12	0.86711	5.76995	12	0.86711	5.78695	12	0.871539	5.74695	12	0.86711	0.286339	0.543119	0.699275
FT217	FT217	34.9692	293.178	MMV021013;Sodium Tetradecyl Sulfate;Gingerol		293.172	293.181	33.7536	36.6567	22	183;953;1691;2412;3185;4003;4965;5718;7565;8406;9096;9804;10559;11950;12542;13326;14047;15462;16269;17098;17855;19290	79.95726;95.95202;96.6689;96.96024;165.0224;292.283;293.1799;294.1433|23739.8031462789;5225.40454617563;1492.14580558812;475315.594205179;524.501039779025;4423.86642708924;1531329.51249975;1079.85215390684	1	0.015717	0.0752506	-0.0720854	-0.111065	0.0549302	-0.0921366	6.13227	6	0.937984	5.83049	5	0.887043	5.58546	4	0.817276	5.74386	5	0.848283	#NUM!	0		5.85886	10	0.893688	5.78718	10	0.873754	5.98138	11	0.921373	5.66466	9	0.837209	0.287378	0.541547	0.699275
FT427	FT427	454.159	509.101	Dendroamide A;Dendroamide A;trans-Caffeic acid [apiosyl-(1->		509.101	509.102	453.398	455.636	12	360;1117;2590;4242;5114;5945;7773;13502;14181;15654;17286;18702	128.0346;143.0458;175.0184;179.0458;197.0553;204.0331;210.0873;254.078;272.0883;304.0606;306.076;509.1016|992.813087984774;748.432507487587;318.707855711681;284.242348371477;174.900074515813;167.145963039945;175.912571327;591.547947862091;1713.33850353598;4116.13290763086;1002.98147496267;3562.14839241398	1	-0.0377343	-0.0225035	-0.00474442	-0.0706682	-0.0239924	0.00232974	4.60116	4	0.145072	4.39866	1	0.0454042	4.43573	2	0.0675526	4.51885	3	0.114064	#NUM!	0		4.51845	6	0.0919158	4.45875	4	0.0708749	4.49991	5	0.0753045	4.47729	5	0.0852713	0.287706	0.541051	0.699275
FT429	FT429	267.943	509.288	MLS001076292-01!11BETA,17ALPHA,21-TRIHYDROXY-4-PREGNENE-3,20		509.287	509.289	266.303	273.173	21	362;1119;1848;2592;3366;4243;5116;5946;6899;7774;9251;9978;10722;12730;13503;14183;15655;16459;17997;18704;19448	78.95909;152.9955;171.007;227.0325;245.0424;255.2335;279.2331;280.2358;281.2483;417.2409;435.2508;507.7248;509.2876|703.670584481373;15125.3266570396;518.695249708611;4729.33749706814;1132.21764275467;626.064540413574;3813.56324069237;3174.61034759169;142653.835357376;1074.88566318358;341.601839181718;373.68975936605;136484.313689772	1	-0.0746636	0.00386309	-0.0579688	0.0217344	-0.0690413	-0.0404805	5.94997	6	0.905869	5.74284	5	0.860465	5.37612	3	0.72536	5.78424	5	0.863787	#NUM!	0		5.66304	9	0.839424	5.76354	10	0.863787	5.8464	11	0.884828	5.58018	8	0.801772	0.288101	0.540455	0.699275
FT270	FT270	43.9094	331.264	(7Z,10Z,13Z,16Z)-docosatetraenoate;Adrenic acid;1-Hydroxy-1-	+	331.263	331.265	42.6203	45.1255	23	233;996;2455;3229;4053;5776;6751;7615;8452;9140;9853;10602;11310;12592;13372;14088;14792;15513;16321;17144;17898;18560;19333	59.01422;177.0927;205.1248;233.2268;259.2431;287.2738;313.2531;329.2484;330.2505;331.2641|754.388899547959;128.833058045103;129.81338335689;826.241808904635;376.591445920354;4545.60441525562;1265.98242215897;477.866204982081;563.75783663122;159297.985968964	1	-0.0282214	-0.0287827	0.0496587	0.0280765	0.0931322	0.0475137	5.40397	4	0.702104	5.6295	6	0.813953	5.63664	5	0.837209	5.89743	6	0.895903	#NUM!	0		5.52031	9	0.779623	5.76346	12	0.86268	5.51674	10	0.766334	5.76704	11	0.873754	0.28977	0.537947	0.699275
FT112	FT112	441.002	207.014	Garcinia acid;2-Naphthalene sulfonic acid;Pyrocoll		207.014	207.015	436.303	445.663	24	96;876;1601;2325;3097;3902;4891;5626;6596;7470;8333;9718;10469;11184;12461;13241;13974;14664;15374;16176;17018;17786;18422;19213	56.99848;59.01406;75.0088;89.02424;117.019;135.0296|2551.92614023646;4248.89128666812;30196.7728366114;2533.96136289476;1118.45193263921;41880.7841789273	1	-0.0353185	-0.00234396	-0.00885939	0.00308771	-0.00533617	0.0348998	4.96823	6	0.415282	4.83914	5	0.310078	4.83878	5	0.346622	4.90687	6	0.376523	#NUM!	0		4.9035	11	0.374308	4.873	11	0.328904	4.90369	11	0.372093	4.87282	11	0.359911	0.29164	0.535153	0.699275
FT247	FT247	39.4758	311.17	C11-LAS (STANDARD MIX);N-Undecylbenzenesulfonic acid;Methyl	+	311.168	311.172	38.1071	40.4447	26	213;979;1712;2438;3209;4030;4993;5751;6728;7595;8434;9124;9830;10584;11292;11973;12571;13354;14073;14770;15492;16299;17123;17882;18540;19313	79.95726;98.95578;117.0342;118.691;119.0501;133.0655;155.988;170.004;182.4562;183.0126;183.6935;183.7748;183.8538;184.0196;185.0272;195.0115;196.0196;197.0276;198.0353;211.043;212.0507;225.0588;226.0666;239.0744;240.0824;247.2065;253.0901;254.0979;267.1061;268.1135;281.1212;293.0698;295.0871;295.137;310.2165;311.1694;311.6757;311.7367;311.785;311.8196;311.9305;312.0085;312.0559;312.094;312.1649;3…	1	0.0142195	0.0081527	-0.012844	-0.10821	0.0232776	0.00242508	6.60057	6	0.982281	6.38273	6	0.974529	6.39901	6	0.975637	6.34127	6	0.972315	#NUM!	0		6.49979	12	0.981174	6.362	12	0.974529	6.49165	12	0.978959	6.37014	12	0.973422	0.292082	0.534495	0.699275
FT416	FT416	290.729	502.277	Buprenorphine;N-Arachidonoyl tyrosine;Xanthomonic Acid		502.273	502.283	288.506	291.868	17	353;1110;1839;2582;3356;4230;5932;6889;7764;8569;9243;9972;10713;12720;15647;16449;17279	224.0692;227.202;305.2494;452.2783;502.2892|137.776377005906;2219.14357404464;708.442777206733;1983.68899836105;715.696375470895	1	-0.055771	0.0337809	-0.00911937	0.0157429	-0.0146337	-0.0206141	4.8038	5	0.290144	4.92696	6	0.403101	4.48643	1	0.089701	4.61614	3	0.169435	#NUM!	0		4.64511	6	0.181617	4.77155	9	0.269103	4.86538	11	0.33887	4.55128	4	0.125138	0.294037	0.531598	0.699275
FT785	FT785	66.0045	841.504	PG(22:6(4Z,7Z,10Z,13Z,16Z,19Z)/20:4(8Z,11Z,14Z,17Z));PG(20:4		841.502	841.506	64.9414	67.3416	16	668;1394;2132;2877;3678;4639;6334;7230;8122;10269;10985;13033;13795;16773;17596;19019	152.9971;283.2434;301.2173;303.2332;327.2335;329.2479;513.2631;767.5466;841.5057;841.5811;842.5108|107.947171537393;825.527390724665;908.298041262435;3815.87262965693;2153.82911942358;1114.33999466365;116.340708075859;969.065001941499;44303.5580379841;488.030779220486;141.724683037205	1	-0.0768311	-0.0085427	-0.0340625	-0.00938803	0.0171604	-0.0572689	4.88789	5	0.363234	4.68336	4	0.208195	4.49778	2	0.0996678	4.67094	3	0.20155	#NUM!	0		4.69284	7	0.209302	4.67715	7	0.197121	4.78563	9	0.271318	4.58436	5	0.148394	0.295475	0.529479	0.699275
FT784	FT784	245.489	841.577	PG(a-13:0/a-25:0);PG(i-13:0/a-25:0)		841.575	841.58	239.539	249.209	17	669;1395;2133;4640;8123;8834;10270;10986;11702;12253;13034;13796;14443;16774;17597;18234;19020		0	0.00663952	-0.0014818	0.0122727	0.0282448	-0.00904682	0.00535042	5.12623	2	0.518272	5.37011	4	0.697674	5.49599	5	0.780731	5.33837	4	0.684385	#NUM!	0		5.31111	7	0.668882	5.35424	8	0.69546	5.24817	6	0.623477	5.41718	9	0.728682	0.297131	0.527052	0.699275
FT561	FT561	405.907	662.062	6-Sinapoylglucoraphenin		662.059	662.063	404.607	407.095	26	479;1222;1952;2707;3494;4396;5211;6084;7032;7924;8670;9344;10090;10821;11535;12132;12840;13612;14261;14988;15779;16569;17401;18074;18828;19542	59.01399;88.0402;141.0166;170.0432;223.0195;252.0466;305.0228;334.0489;387.0257;416.0524;469.0279;498.0556;551.0332;580.0592;662.0621|1343.4881064818;2892.6826274339;38249.2787952984;60556.8398413654;11087.2272341539;18619.8058252359;19662.8154464613;44556.5580867226;10084.0667299432;35182.893147623;4359.697823951;27661.8617331573;331.993929978216;7903.4801089641;3693.58406535257	1	-0.0421978	-0.0204752	0.0213254	0.0100206	-0.0118287	-0.0119846	5.39196	6	0.693245	5.50539	6	0.760797	5.40645	6	0.736434	5.50327	6	0.756368	#NUM!	0		5.39921	12	0.723145	5.50433	12	0.763012	5.44868	12	0.733112	5.45486	12	0.749723	0.297977	0.525817	0.699275
FT492	FT492	467.352	565.048	Uridine diphosphategalactose;Uridine diphosphate galactose;U	+	565.046	565.05	466.087	468.735	25	413;1164;1897;2645;3423;4309;5159;6003;6949;7835;8616;9293;10027;10764;11483;12777;13548;14218;14938;15708;16508;17332;18028;18754;19492	78.95924;96.96957;111.0197;120.9693;138.9798;150.9797;158.9252;162.9797;164.0351;168.9905;174.9798;176.9357;182.0455;192.9905;204.9906;211.0013;223.0012;241.012;254.9463;259.0227;260.9569;262.0118;272.9571;280.0229;290.9674;302.9674;305.0182;320.9783;322.0395;323.0296;384.9847;402.995;453.0201;467.0708;485.0808;547.0371;563.3101;565.0494|138083.910458662;79747.5527279728;18082.5024646527;3376.185…	1	-0.114666	0.0602252	-0.0309553	-0.0109291	-0.00485148	0.0412163	6.44066	6	0.972315	6.33289	6	0.968992	5.53122	5	0.796235	5.88952	6	0.894795	#NUM!	0		5.98594	11	0.923588	6.1112	12	0.939092	6.38677	12	0.973422	5.71037	11	0.853821	0.298569	0.524955	0.699275
FT318	FT318	400.267	387.026	13alpha-Hydroxydolineone;4,7-dihydroxy-3-[(4-hydroxy-2-oxo-2		387.025	387.027	399.244	401.962	26	267;1032;1757;2490;3266;4105;5039;5827;6794;7664;8489;9170;9891;10637;11348;12013;12630;13410;14114;14825;15557;16357;17185;17931;18603;19371	58.83914;59.01462;140.59;141.0172;141.618;141.6415;141.6869;141.7543;222.3397;223.0204;305.0234;387.0255|3882.86230223018;1071570.81866917;10783.8479204056;3539060.84699151;4861.89999136305;1436.57711193143;2548.83800016613;775.535650092812;1059.66461212586;316469.54587212;104807.246794908;776.461892948205	1	0.00479153	0.0214312	-0.00130917	0.00619621	-0.00893795	-0.0135412	6.72995	6	0.993355	6.7852	6	0.993355	6.73639	6	0.994463	6.69269	6	0.991141	#NUM!	0		6.73317	12	0.99557	6.73894	12	0.992248	6.75758	12	0.993355	6.71454	12	0.993355	0.298617	0.524886	0.699275
FT340	FT340	34.3225	421.226	2-Methylacetophenone;bonactin;NCGC00180835-03!2-[5-[2-[2-[5-		421.221	421.23	33.1608	35.6732	26	283;1047;1773;2507;3284;4129;5055;5849;6815;7685;8504;9181;9905;10651;11367;12025;12647;13428;14128;14843;15576;16375;17208;17945;18621;19387	79.95725;80.72276;80.96527;127.1118;132.9597;183.1389;227.1285;291.0905;293.1784;419.9327;421.2267|2066.78747470077;1206.21178230069;359768.940461406;818.622424779124;1828.34089173926;1827.17831062701;9037.97087518141;5941.61569844768;966.487448397584;3651.37638365738;1224400.29007331	1	-0.0154657	0.0512068	0.001569	-0.130676	-0.0621986	-0.0743685	6.1241	6	0.93577	5.73674	6	0.85825	6.02482	6	0.932447	5.84161	6	0.882614	#NUM!	0		6.07446	12	0.93577	5.78917	12	0.874862	5.93042	12	0.903654	5.93321	12	0.908084	0.29937	0.523792	0.699275
FT151	FT151	68.0276	241.12	Pyroglutamyl-Isoleucine;NCGC00386092-01_C11H18N2O4_;2,6-Di-t	+	241.12	241.121	64.2952	69.0801	26	129;904;1636;2359;3131;3940;4920;5660;6635;7504;8360;9044;9749;10502;11215;11906;12491;13271;14004;14694;15405;16208;17049;17813;18457;19242	59.01395;85.00469;154.1234;155.108;198.1134;241.12;241.217|298.888523245686;814.905879352046;209.197794225966;1281.47085845685;20984.0319965535;55526.1586145079;243.84512244016	1	-0.018542	0.0271454	-0.0326874	-0.017284	-0.0163447	-0.026475	6.54636	6	0.978959	6.35778	6	0.9701	6.52141	6	0.982281	6.21908	6	0.952381	#NUM!	0		6.53389	12	0.984496	6.28843	12	0.967885	6.45207	12	0.975637	6.37025	12	0.974529	0.299743	0.523251	0.699275
FT496	FT496	467.993	567.054	(2-hydroxy-5-{3,5,7-trihydroxy-6-[3,4,5-trihydroxy-6-(hydrox		567.051	567.059	466.816	468.735	6	2648;3425;4313;6005;7839;8619		0	-0.0277644	0.0198176	-0.0091633	-0.0490093	0.0103223	0.013069	5.02206	4	0.45515	4.86435	2	0.327796	4.71527	0	0.246955	4.71527	0	0.221484	#NUM!	0		4.86867	4	0.345515	4.78981	2	0.277962	4.94321	6	0.401993	4.71527	0	0.232558	0.300279	0.522475	0.699275
FT386	FT386	400.267	470.032	Cloxacillin;CloxacillinNa;Cefmetazole		470.03	470.033	399.244	401.962	26	325;1088;1817;2555;3332;4191;5092;5908;6866;7741;8547;9226;9948;10691;11412;12053;12698;13473;14163;14875;15621;16420;17254;17980;18667;19428		0	0.00498878	0.0214498	-0.00172454	0.00580009	-0.00798852	-0.0147351	5.90482	6	0.89258	5.96095	6	0.910299	5.91286	6	0.906977	5.86948	6	0.888151	#NUM!	0		5.90884	12	0.904762	5.91522	12	0.90144	5.93289	12	0.906977	5.89117	12	0.898117	0.30112	0.521261	0.699275
FT105	FT105	233.512	196.028	4-Acetylimidazo[4,5-c]pyridine;3-Hydroxy-2-methylpyridine-4,		196.028	196.029	232.268	237.557	8	870;3891;6584;7459;10463;13232;15366;18414	79.95725;80.96525;136.0067;196.028|771.900541084343;270.173483779927;400.237245576182;455.35699155482	1	-0.0341613	-0.0209815	0.0346405	-0.0133722	-0.0666624	-0.0238736	4.45646	1	0.0653378	4.60077	3	0.14175	4.47011	1	0.0819491	4.56779	2	0.140642	#NUM!	0		4.46328	2	0.0642303	4.58428	5	0.130676	4.52862	4	0.0885936	4.51895	3	0.104097	0.302289	0.519577	0.699275
FT393	FT393	289.612	480.308	LysoPC(15:0);LysoPE(0:0/18:0);LysoPE(18:0/0:0)		480.307	480.31	287.103	291.805	26	332;1092;1822;2563;3338;4201;5099;5913;6872;7746;8552;9230;9954;10697;11417;12060;12703;13479;14168;14879;15628;16427;17260;17984;18673;19433	78.9591;140.0112;152.9948;196.038;214.0478;224.0685;255.2326;281.2482;282.2518;283.2642;480.309|890.43371124461;1312.89176251267;464.241635517207;5916.35856664303;1305.6519178822;1109.5641979292;18380.591743064;683.316575119204;853.074035661314;115276.671877536;66618.0290250589	1	-0.0227575	-0.000584319	0.0111921	0.00780575	0.00747876	-0.000596249	5.53943	6	0.766334	5.60578	6	0.806202	5.46553	6	0.774086	5.59036	6	0.79402	#NUM!	0		5.50248	12	0.776301	5.59807	12	0.800664	5.5726	12	0.791805	5.52794	12	0.779623	0.303835	0.517363	0.699275
FT698	FT698	516.196	773.198	Propionyl-Albicidin;Flavone base + 3O, 2MeO, O-MalonylHex, O		773.197	773.2	514.68	517.329	17	592;1329;3602;4550;5321;7147;8042;8771;9441;10198;10919;11639;12961;14364;15889;16695;17512	254.0767;272.0888;304.0602;306.0765;338.0473;376.0826;378.0978;434.1404;466.1136;468.1292;500.1029;611.1457;653.1564;683.1659;711.194;729.2107;755.1877;773.1997|403.906198318475;2101.23193603002;1325.31382573611;6853.46801457055;765.398509888519;558.339999801092;1118.44270302286;666.54674375294;2060.7548629874;2056.40122466569;456.845878393727;8461.26628279029;664.81063256058;782.229330232718;455…	1	-0.0254801	0.0214587	-0.0139647	0.0278185	-0.0131178	0.0299794	4.62446	3	0.163898	4.7877	6	0.277962	4.56396	3	0.142857	4.52771	3	0.117386	#NUM!	0		4.59421	6	0.148394	4.6577	9	0.181617	4.70608	9	0.223699	4.54583	6	0.122924	0.305125	0.515522	0.699275
FT430	FT430	268.461	510.291	Cytochalasin Ppho;Oxysporidinone_130003;Oxysporidinone_13000		510.29	510.292	266.371	273.173	18	363;1120;1849;2593;3367;4245;5117;5947;6901;7776;9252;9979;10723;12731;13504;15657;16460;18706		0	-0.0583954	-0.00139351	-0.0404804	0.0179475	-0.0512175	-0.0391429	5.36634	6	0.678848	5.25041	5	0.635659	5.01256	2	0.495017	5.18738	3	0.591362	#NUM!	0		5.18945	8	0.599114	5.2189	8	0.615725	5.30838	11	0.664452	5.09997	5	0.54928	0.305175	0.515451	0.699275
FT409	FT409	494.258	497.065	Diosmetin 7-O-beta-D-glucuronopyranoside;3,4,5-trihydroxy-6-		497.064	497.066	492.977	495.326	23	348;1105;1834;2576;3352;4220;5109;5928;6883;7759;8565;9965;10708;11430;12715;13493;14176;14890;15640;16442;17274;18688;19441	70.02979;74.0245;86.0247;97.04059;99.05608;102.0019;105.9963;114.0193;120.0124;126.0437;127.0509;128.035;135.0563;141.0307;141.0664;143.0459;145.0617;145.9912;146.0453;148.0072;151.0508;153.0665;155.0824;158.0092;160.0069;164.0838;166.0981;167.0461;167.0826;169.0615;171.0411;175.0183;176.0014;177.034;179.0458;181.0617;182.0932;184.1096;185.0388;185.056;191.997;192.0771;197.0566;203.0495;208.0722;…	1	-0.0640832	-0.0313269	-0.0110194	-0.0251413	-0.0327482	0.0294799	5.68102	6	0.830565	5.49992	5	0.75526	5.43672	5	0.751938	5.54687	5	0.768549	#NUM!	0		5.55887	11	0.795127	5.52339	10	0.769657	5.59047	11	0.797342	5.4918	10	0.763012	0.308095	0.511316	0.699275
FT709	FT709	237.734	776.559	PE(22:4(7Z,10Z,13Z,16Z)/P-18:1(11Z));PE(22:4(7Z,10Z,13Z,16Z)		776.555	776.561	232.347	239.957	17	598;1331;6247;7152;8776;10203;10924;11645;12202;13719;14373;15109;15896;16703;17520;18167;18943	253.2177;255.2329;285.2589;303.2333;305.2463;328.2401;329.249;330.2517;331.2634;333.2778;357.278;444.2871;446.3029;462.298;464.3139;490.3261;702.5102;702.5457;716.5252;774.1651;776.5609;776.627|1440.41617906821;1037.83759159164;571.815351297437;1156.63722914341;107.369532771952;118.964952563647;10717.8744923376;664.982245758327;7380.26951576459;101.431946105595;127.299724263059;455.441474780662;6…	1	0.0286015	-0.0535182	0.0384501	-0.00090213	-0.0118747	-0.01863	4.96333	1	0.409745	5.11656	4	0.548173	5.36997	5	0.718715	5.36753	5	0.703212	#NUM!	0		5.16665	6	0.575858	5.24204	9	0.636766	5.03995	5	0.483942	5.36875	10	0.709856	0.31103	0.507198	0.699275
FT385	FT385	400.261	469.029	MMV688371;Glucobrassicin;Indolylmethyl glucosinolate		469.028	469.031	399.244	401.382	26	324;1086;1815;2553;3330;4189;5090;5905;6865;7740;8545;9224;9946;10690;11411;12051;12697;13472;14162;14874;15620;16419;17252;17979;18666;19427	58.83915;59.01459;140.5901;141.0173;141.6171;141.6853;222.3402;223.0204;304.0897;305.0235;387.0263;469.0276|3017.92310423034;778327.399453594;16840.231478866;5458511.76216986;4530.81326439178;2810.4468584064;3799.31327881418;968071.19282355;3578.4193129435;1055270.38746215;244303.007858047;4738.75908611953	1	0.00477543	0.0222091	-0.00187747	0.00576612	-0.00893435	-0.0155712	6.80455	6	0.996678	6.86041	6	0.996678	6.80573	6	0.997785	6.76703	6	0.99557	#NUM!	0		6.80514	12	0.998893	6.81372	12	0.99557	6.83248	12	0.996678	6.78638	12	0.996678	0.312617	0.504988	0.699275
FT895	FT895	236.97	995.618			995.615	995.621	231.598	239.666	15	764;4755;5496;6455;7333;10368;11796;12342;13131;13882;14551;15260;16059;16881;19112		0	0.0270791	-0.0531968	-0.0361622	-0.0165988	-0.0338534	-0.00804439	4.55184	3	0.114064	4.38871	2	0.0409745	4.77063	6	0.283499	4.47912	3	0.0908084	#NUM!	0		4.66123	9	0.189369	4.43392	5	0.0620155	4.47027	5	0.0642303	4.62488	9	0.178295	0.313071	0.504357	0.699275
FT879	FT879	373.314	940.811			940.807	940.814	372.653	374.688	16	746;2196;2950;3744;4730;6426;8201;8904;9595;13113;14529;16036;16864;17683;19095;19770	59.01384;156.9906;254.9677;352.9444;450.9213;548.8981;646.8765;744.8535;842.8333;940.8118;1038.787|223.76187572823;15727.5146811755;6772.5689980221;22762.0102874296;20792.8577119912;15391.9695900008;14129.0957258785;8549.9849173608;3901.44252360973;918.386160468208;211.636011104429	1	-0.0439719	0.0233347	-0.0222512	-0.0195861	0.054697	-0.0124767	5.18763	5	0.568106	4.99215	3	0.452935	4.81019	2	0.318937	5.12867	5	0.557032	#NUM!	0		4.99891	7	0.460687	5.06041	8	0.511628	5.08989	8	0.517165	4.96943	7	0.449612	0.314381	0.502544	0.699275
FT788	FT788	246.947	843.595			843.593	843.597	243.066	251.259	24	672;1398;2136;2880;4644;6339;7233;8126;8837;9511;10274;10990;11705;12255;13037;13799;14446;15170;15968;16778;17599;18237;19024;19697		0	0.010924	0.00581783	0.0262069	-0.00793441	0.0281745	-0.0112326	5.29135	4	0.633444	5.44148	6	0.72536	5.4482	6	0.75969	5.44666	6	0.734219	#NUM!	0		5.36977	10	0.704319	5.44407	12	0.739756	5.36641	10	0.697674	5.44743	12	0.746401	0.315134	0.501505	0.699275
FT472	FT472	400.108	553.036	Ceftriaxone;{5-[12-(3,4-dihydroxyphenyl)-8,13-dihydroxy-4-ox		553.034	553.037	399.244	401.946	26	399;1153;1883;2630;3406;4292;5147;5989;6938;7818;8604;9281;10016;10757;11470;12094;12764;13538;14207;14926;15695;16498;17321;18020;18744;19480		0	0.00506171	0.0221365	-0.00236715	0.00586034	-0.00982913	-0.0163944	5.40458	6	0.703212	5.46151	6	0.738649	5.4093	6	0.737542	5.36525	6	0.698782	#NUM!	0		5.40694	12	0.728682	5.41338	12	0.723145	5.43305	12	0.726467	5.38728	12	0.718715	0.315425	0.501103	0.699275
FT602	FT602	252.041	717.527	DG(18:2n6/0:0/22:4n6);PA(15:0/22:0);PA(20:0/17:0)		717.526	717.528	250.107	256.686	23	516;1256;1989;2746;3538;5241;7071;7963;8706;9389;10128;10854;11567;12147;12880;13643;14287;15019;15817;17438;18100;18860;19573		0	0.0203135	0.024034	0.0113782	0.0227235	-0.0110409	0.0306818	5.16198	4	0.54928	5.30733	6	0.667774	5.34104	6	0.702104	5.15648	5	0.572536	#NUM!	0		5.25151	10	0.635659	5.2319	11	0.625692	5.23465	10	0.614618	5.24876	11	0.643411	0.319317	0.495778	0.699275
FT242	FT242	400.518	307.027	cis-Resveratrol 3-sulfate;cis-Resveratrol 4'-sulfate;Resvera		307.026	307.028	399.244	401.962	26	207;972;1710;2434;3206;4027;4988;5744;6724;7590;8429;9119;9825;10578;11289;11968;12566;13347;14067;14767;15487;16294;17119;17877;18535;19309		0	0.00522031	0.0197161	-0.000306338	0.00530817	-0.00702201	-0.0110506	4.94253	6	0.395349	4.99168	6	0.451827	4.94695	6	0.448505	4.91607	6	0.385382	#NUM!	0		4.94474	12	0.409745	4.95387	12	0.417497	4.96711	12	0.419712	4.93151	12	0.419712	0.319421	0.495636	0.699275
FT387	FT387	400.267	471.033	C.I. Food Red 6;[2,2-dimethyl-6-(3,5,7-trihydroxy-4-oxo-4H-c		471.032	471.034	399.244	401.946	26	326;1089;1818;2556;3333;4194;5093;5911;6867;7742;8548;9227;9949;10692;11413;12054;12699;13474;14164;14876;15622;16421;17256;17981;18668;19429		0	0.00502782	0.0206756	-0.00189129	0.00614802	-0.00712167	-0.0134511	5.28006	6	0.629014	5.3327	6	0.682171	5.28524	6	0.669989	5.25177	6	0.635659	#NUM!	0		5.28265	12	0.655592	5.29224	12	0.669989	5.30638	12	0.660022	5.2685	12	0.655592	0.320125	0.494681	0.699275
FT470	FT470	400.108	552.035	Fenticonazole nitrate;2-[({3-[3,4-dihydroxy-5-(3,4,5-trihydr		552.034	552.037	399.244	401.188	26	398;1152;1882;2629;3405;4290;5146;5988;6937;7816;8603;9279;10015;10756;11469;12093;12763;13537;14206;14925;15694;16497;17320;18019;18743;19479		0	0.00492935	0.0229664	-0.002521	0.00506459	-0.00978632	-0.0164773	6.01916	6	0.923588	6.07451	6	0.933555	6.01793	6	0.93134	5.97621	6	0.914729	#NUM!	0		6.01854	12	0.93134	6.02536	12	0.921373	6.04683	12	0.929125	5.99707	12	0.930233	0.320196	0.494584	0.699275
FT279	FT279	38.3093	339.204	(4S,4aR,8aS)-4-[(3R)-3-hydroxy-3-methylpent-4-enyl]-3,4a,8,8	+	339.201	339.224	37.3485	39.5671	16	1003;2461;3236;4066;5012;5786;6758;7627;9145;9860;11990;14092;15520;17151;17903;19339	79.95723;98.95605;119.0499;133.0654;155.9882;163.1131;170.0041;182.4561;183.0126;183.6957;183.7754;184.0193;195.012;196.0194;197.0274;198.0349;211.0432;212.051;225.0588;226.0665;239.0743;240.0823;253.0901;254.0976;267.1053;268.1129;275.2377;281.1211;282.1295;295.1366;309.1523;323.1691;338.1608;339.2012;339.7292;339.79;339.8449;339.9547;339.9919;340.0449;340.1294;340.1801;340.2389;340.2723;340.345…	1	0.0165636	0.0461571	0.0153459	-0.203792	0.0243242	-0.019448	6.24341	5	0.953488	5.80828	4	0.882614	5.42899	2	0.749723	5.8505	4	0.885936	#NUM!	0		5.8362	7	0.887043	5.82939	8	0.884828	6.02584	9	0.92691	5.63974	6	0.833887	0.3218	0.492414	0.699275
FT203	FT203	326.469	282.155	Histidinyl-Lysine;Lysyl-Histidine;Cadralazine		282.155	282.156	324.566	328.052	14	173;944;1682;3172;3989;6688;7553;9793;10548;12531;13314;15450;16257;18503	71.01389;87.00836;88.75724;89.0248|700.377853203155;740.631127114936;836.599334658183;257353.737894413	1	-0.0510823	-0.00423528	0.00374064	0.0524243	-0.0686815	-0.0306917	5.02242	3	0.456257	5.18096	4	0.591362	5.02634	2	0.501661	5.12423	3	0.552602	#NUM!	0		5.02438	5	0.47619	5.1526	7	0.568106	5.10169	7	0.520487	5.07528	5	0.533776	0.321835	0.492367	0.699275
FT390	FT390	483.524	476.044	CDP-glycerol		476.043	476.046	482.259	484.082	13	1090;2559;5095;8549;9228;9951;11414;13476;14878;16424;17258;18670;19431	78.95853;110.0244;128.0347;154.9747;216.0508;240.0509;284.0409;302.0514;320.0617|177.038615569124;1210.63686460946;953.20028517784;1020.92811123246;152.200382848139;4093.27236154704;428.004206438078;2758.4170872441;1052.37444824895	1	0.00761525	-0.00710318	0.0288874	0.00734052	0.0395189	0.0155881	4.31285	2	0.0188261	4.46769	3	0.0675526	4.41852	3	0.0542636	4.45335	4	0.0830565	#NUM!	0		4.36568	5	0.0232558	4.46052	7	0.0730897	4.39027	5	0.0321152	4.43594	7	0.0642303	0.322743	0.491144	0.699275
FT640	FT640	405.325	744.065			744.062	744.067	404.552	406.967	24	547;1286;2017;2773;3564;4488;5274;6178;7104;7995;8733;9411;10156;10881;11597;12915;13671;15053;15849;16639;17466;18127;18888;19600	59.01396;88.04029;141.0167;170.0433;223.02;252.0466;305.0232;334.0495;387.0259;416.0527;469.0292;498.0548;551.0318;580.0591;633.0368;662.063;744.0663|344.804980902795;508.433589892164;19534.1786357349;26433.7619384785;8316.57087737784;11670.9560035574;13674.0284935172;23965.8582309569;12305.109257575;30822.6505006283;4051.73170975475;15994.7917113659;2770.72326407676;19877.9120017685;446.91767337…	1	-0.0619168	-0.0227756	0.0256668	0.0134951	-0.00928626	-0.0114671	5.27099	6	0.623477	5.38972	6	0.706534	5.18841	4	0.620155	5.3808	6	0.707641	#NUM!	0		5.2297	10	0.6268	5.38526	12	0.712071	5.33035	12	0.681063	5.2846	10	0.66113	0.323557	0.490049	0.699275
FT370	FT370	292.84	452.277	LPE 16:0;LysoPE(0:0/16:0);LysoPE(16:0/0:0)	+	452.277	452.279	291.255	295.761	26	307;1072;1798;2538;3314;4166;5075;5882;6849;7720;8529;9208;9930;10677;11394;12041;12678;13455;14145;14864;15604;16406;17235;17967;18650;19413	196.038;227.201;255.2327;452.2784|1539.083603445;1606.57123665557;31614.1699304423;11493.3594379826	1	-0.0377858	-0.0106793	0.0076219	0.0148425	-0.0164838	0.000977946	5.21814	6	0.589147	5.31079	6	0.672204	5.14556	6	0.596899	5.25149	6	0.633444	#NUM!	0		5.18185	12	0.59247	5.28114	12	0.66113	5.26446	12	0.633444	5.19852	12	0.610188	0.325126	0.487949	0.699275
FT012	FT012	310.476	89.025	STD_Lactic acid;Glyceraldehyde;Glyceraldehyde	+	89.0249	89.0256	308.83	311.781	26	10;793;1497;2238;2999;3796;4799;5531;6492;7359;8257;8930;9640;10387;11090;11808;12365;13158;13894;14580;15275;16082;16923;17714;18335;19130	71.01391;87.00877;89.02456|2441.53332137806;768.57430993941;37720.6838049767	1	-0.00524264	1.60548e-05	0.0179089	0.0268778	-0.000233052	0.00344553	5.9682	6	0.913621	6.0509	6	0.930233	6.10993	6	0.946844	6.1155	6	0.937984	#NUM!	0		6.03907	12	0.934662	6.0832	12	0.933555	6.00955	12	0.922481	6.11272	12	0.942414	0.325322	0.487687	0.699275
FT894	FT894	237.074	994.613			994.611	994.616	231.598	239.666	22	763;1480;2968;3761;4754;5495;6454;7332;8224;8916;10367;11795;12341;13130;13881;14550;15259;16058;16880;18320;19111;19782	303.2327;304.2365;305.2453;331.2638;464.3109;748.5273;749.5336;750.5447;751.5496;994.5737;994.6181|1593.98013428134;156.382577045213;123.546780211643;263.029316782101;341.636242079699;395.770717225241;1239.96316535516;15943.4037815337;126.932056638816;100.885986290041;1191.86294578956	1	0.0254428	-0.0523134	-0.0159054	-0.044552	-0.0374976	0.021113	4.86675	5	0.336656	4.68386	4	0.21041	5.05475	6	0.520487	4.81575	5	0.291251	#NUM!	0		4.96075	11	0.424142	4.74981	9	0.245847	4.77531	9	0.262458	4.93525	11	0.423034	0.325636	0.487267	0.699275
FT550	FT550	400.198	635.04	Castacrenin A;Castacrenin B;Castacrenin C		635.037	635.041	399.277	401.188	25	468;1213;1946;2697;3483;4384;5203;6074;7021;7909;8666;9332;10080;10811;11529;12829;13603;14254;14982;15768;16559;17390;18069;18817;19533		0	-0.0250073	0.0160443	-0.00911511	0.0215745	0.00232139	0.0176839	5.44796	6	0.724252	5.50571	6	0.761905	5.30979	5	0.69103	5.40132	6	0.715393	#NUM!	0		5.37887	11	0.709856	5.45352	12	0.744186	5.47683	12	0.747508	5.35555	11	0.705426	0.325876	0.486947	0.699275
FT621	FT621	400.198	731.014			731.011	731.022	399.277	401.188	25	532;1272;2002;2760;3553;4466;5260;6158;7087;7977;8720;9401;10144;10870;11581;12897;13659;14302;15037;15833;16622;17454;18114;18877;19588	141.0168;223.0201;305.0233;387.0259;469.0285;485.0038;551.0347;567.006;633.0342;649.0031;649.0175;731.0105|1810.61299198092;710.107574059698;1730.14280603745;1559.27201110422;993.332260836726;74.1594139520089;461.431729672523;198.454887045091;319.831625314259;51.4713340743583;49.3273980585627;36.4178871679087	1	-0.0334418	0.011271	-0.00146265	0.00678369	-0.00212324	0.000694923	4.98424	6	0.425249	5.03775	6	0.493909	4.82285	5	0.333333	4.90789	6	0.37763	#NUM!	0		4.90354	11	0.375415	4.97282	12	0.444075	5.011	12	0.45515	4.86537	11	0.353267	0.32643	0.48621	0.699275
FT714	FT714	290.118	782.498	PS(16:0/20:4(5Z,8Z,11Z,14Z));PS(16:1(9Z)/20:3(8Z,11Z,14Z));P		782.495	782.5	288.258	291.493	18	603;1335;2068;2818;3614;4566;5340;7158;8050;9451;10208;10927;12968;13727;14381;15902;16708;18946	78.95931;152.9954;255.2322;277.217;279.2318;281.2504;303.2314;391.2276;409.236;413.2097;415.2258;417.2414;431.2206;433.2355;435.2542;439.2147;695.4679;696.4688;782.4303;782.5003|38.8991577200301;473.266303779923;457.499764710568;279.63047023637;1288.6919279429;528.016065901528;135.111279378864;514.522453674149;190.736998365958;260.395108256068;1007.10112846222;323.568977531392;38.4592664234447;28…	1	-0.0258488	0.027621	-0.01694	0.0316109	-0.0651271	-0.0215558	4.7052	5	0.217054	4.86165	5	0.325581	4.5797	3	0.153931	4.56049	3	0.13289	#NUM!	0		4.64245	8	0.178295	4.71107	8	0.218162	4.78342	10	0.267996	4.5701	6	0.140642	0.332247	0.478539	0.699275
FT511	FT511	48.9886	582.38	CerP(d18:1/12:0)		582.374	582.393	46.586	50.5044	19	429;1179;1912;2661;3438;4331;5171;6023;6970;7858;8632;10780;11494;12795;13564;15724;17349;18772;19504	59.01395;152.9956;168.0423;224.0692;242.0797;281.2468;282.2514;282.3977;283.2643;506.7777;507.3274;508.3406;582.3785|1192.10313054843;455.129132007873;751.173980214094;6429.92100488393;1719.57000063806;1032.50275476566;1231.99698747955;398.943558101178;119287.361858452;422.614467207006;375.43932290987;144544.530540649;13951.8634177968	1	-0.0575803	0.0119458	0.00359446	-0.0118198	0.00648386	0.0125234	5.23503	6	0.596899	5.0785	4	0.51938	4.87608	3	0.376523	5.11013	4	0.543743	#NUM!	0		5.05556	9	0.504983	5.09432	8	0.526024	5.15677	10	0.563677	4.99311	7	0.472868	0.332399	0.47834	0.699275
FT755	FT755	290.121	813.547	PG(18:0/18:0);PG(i-12:0/i-24:0);[3-[[2,3-dihydroxypropoxy]-h		813.546	813.549	288.059	291.597	14	2104;2849;4607;5374;6297;7202;9481;10240;12227;13005;13762;15939;16745;18987		0	-0.00627408	-0.0069364	-0.0230581	-0.00570045	-0.0272829	-0.0315738	4.73821	5	0.248062	4.62421	3	0.169435	4.60697	3	0.172757	4.63998	3	0.182724	#NUM!	0		4.67259	8	0.198228	4.6321	6	0.165006	4.68121	8	0.196013	4.62348	6	0.17608	0.335522	0.474279	0.699275
FT368	FT368	59.4655	451.09	NCGC00380244-01!1,5,8-trihydroxy-4-methoxy-3-[(2S,3R,4S,5S,6	+	451.089	451.09	58.4031	62.2573	15	305;1070;1796;2535;3311;5073;7718;9927;11391;12675;13453;14143;15602;16402;17965	112.9876;145.0135;231.0309;245.0471;263.0576;273.0419;283.2624;303.0174;315.0522;359.0423;419.063;451.0908|373.076724271823;1747.64347937418;1812.30995187365;1069.74052178551;360.007876202548;2001.73700090356;291.873658711472;892.325561028593;635.430513833361;1641.9506341294;2119.70878432215;27646.5091353018	1	-0.0168435	0.0143361	-0.0188558	0.0286792	-0.0403268	0.0715831	5.2014	4	0.575858	5.0449	2	0.498339	5.32138	4	0.69546	5.16018	3	0.575858	#NUM!	0		5.26139	8	0.644518	5.10254	5	0.531561	5.12315	6	0.537099	5.24078	7	0.634551	0.337495	0.471733	0.699275
FT700	FT700	69.6279	773.533	PG(18:0/18:2(9Z,12Z));PG(18:1(11Z)/18:1(11Z));PG(18:1(11Z)/1		773.532	773.536	66.2496	72.7666	17	593;2057;2812;3603;7148;8043;8772;9442;10199;11640;13716;14365;15105;15890;17513;18164;19641	152.9955;255.2328;279.2338;280.237;280.3885;281.2487;282.2525;283.2609;307.2632;417.2413;491.2783;509.2901;771.1509;773.5358;774.541|1233.92454415493;142.562973138621;4402.28645593082;2392.58737059106;146.603903245307;60426.4659648641;2499.00136283889;2377.12208384789;157.895906684905;1731.6261378127;2094.50161654402;1055.66880382654;565.737606662765;194280.480475723;318.633133549429	1	0.00113535	0.0332185	0.083544	0.00936284	0.0838874	0.130201	5.31795	3	0.646733	5.5618	5	0.785161	5.50733	4	0.785161	5.59089	4	0.795127	#NUM!	0		5.41264	7	0.730897	5.57634	9	0.790698	5.43988	8	0.72979	5.54911	8	0.788483	0.338589	0.470328	0.699275
FT868	FT868	244.951	918.609	PS(20:2(11Z,14Z)/24:1(15Z));PS(20:3(5Z,8Z,11Z)/24:0);PS(20:3		918.607	918.612	242.587	247.195	26	735;1458;2186;2941;3737;4720;5459;6413;7295;8191;8894;9581;10343;11043;11767;12312;13102;13860;14515;15228;16026;16852;17672;18298;19085;19759	92.02507;135.0308;136.0334;279.2322;281.2482;674.5107;767.5442;768.5556;844.5875;918.5323;918.6108;918.6854;919.6148|1175.83502416187;98788.3242129238;3350.30230045257;1953.02688790426;806.142584554732;638.422936754068;662.37141856102;19562.5309117778;1284.4359505177;804.538313633776;157197.05851128;612.600172006734;1850.85187721731	1	-0.0048362	-0.015283	0.00486545	0.00458921	-0.00566536	0.0166351	5.74643	6	0.852713	5.8005	6	0.881506	5.761	6	0.878184	5.81162	6	0.875969	#NUM!	0		5.75372	12	0.864895	5.80606	12	0.879291	5.77347	12	0.86711	5.78631	12	0.877076	0.33912	0.469647	0.699275
FT797	FT797	249.115	846.61	PE(24:1(15Z)/P-18:1(11Z));PE(24:1(15Z)/P-18:1(9Z));PE(P-18:1		846.598	846.616	245.78	252.62	21	679;1404;2887;3687;7241;8134;8840;10283;10997;11711;12258;13045;13806;14453;15178;15975;16788;17609;18242;19031;19703	87.00821;255.2298;256.2392;280.232;281.2484;283.2639;508.3497;673.4817;716.5139;718.5426;744.5511;771.5701;772.5832;846.5893|110.394284792304;77.7815102541993;35.0369308180007;39.4594676496922;241.184411559269;43.9226167535594;37.9613447784436;39.3245647326694;58.5891381966576;31.5924230380006;222.436087183075;42.0910315687024;1241.72704454236;2110.40872943508	1	0.0251412	0.00377106	0.046366	0.0118719	0.00103585	0.00579546	4.97759	2	0.423034	5.1197	5	0.54928	5.34954	6	0.710963	5.23732	6	0.624585	#NUM!	0		5.16357	8	0.572536	5.17851	11	0.593577	5.04865	7	0.487265	5.29343	12	0.672204	0.339666	0.468948	0.699275
FT638	FT638	249.688	742.539	PC(15:0/18:2(9Z,12Z));PC(18:2(9Z,12Z)/15:0);PE(14:0/22:2(13Z		742.537	742.54	247.897	253.974	26	546;1285;2016;2772;3563;4485;5273;6175;7103;7993;8732;9409;10155;10879;11596;12166;12913;13670;14316;15052;15847;16635;17465;18125;18886;19598	140.0112;196.0379;253.2166;255.2325;279.2327;280.2362;280.3882;281.2483;282.2514;283.2637;306.251;307.2633;458.2648;460.2829;462.2982;476.275;478.2932;479.2967;480.3079;740.2487;741.5239;742.5399;743.5429|1891.06041250877;1866.07208472288;1622.82389135957;12676.8531192835;106615.575874696;8717.02720815828;339.961346152651;132076.804771638;4247.578392766;24926.2135414256;446.389773523242;2806.4613…	1	0.0126362	-0.0201345	-0.0292757	-0.00830529	0.0188895	0.00464611	6.00387	6	0.921373	5.91164	6	0.902547	6.00111	6	0.929125	5.96704	6	0.910299	#NUM!	0		6.00249	12	0.92691	5.93934	12	0.909192	5.95775	12	0.913621	5.98408	12	0.925803	0.340863	0.467421	0.699275
FT587	FT587	269.694	701.512	PA(14:0/22:1(13Z));PA(18:1(11Z)/18:0);PA(18:1(9Z)/18:0)		701.512	701.512	269.694	269.694	1	9374	152.9951;281.2496;282.25;283.2648;284.2665;417.2416;418.2424;419.2563;435.2508;437.2646;649.4051;701.2785;701.3569;701.4076;701.4376;701.5129|178.407076556836;351.306428942584;120.217825315581;744.08623301299;44.000253040258;68.7833939780035;30.9898018034914;272.92396736018;50.9332637495504;155.499068865612;51.4874284940561;53.5039551659338;46.8187512645727;31.2135579828237;39.5752333945723;2212.…	1	0.00210205	0.00809509	0.0024645	0.00213191	0.00448354	-0.00656335	4.88106	0	0.351606	4.93449	1	0.41196	4.88106	0	0.39258	4.88106	0	0.34773	#NUM!	0		4.88106	0	0.35825	4.90778	1	0.369878	4.90778	1	0.376523	4.88106	0	0.371539	0.340893	0.467382	0.699275
FT213	FT213	438.642	288.119	OPHTHALMIC ACID;OPHTHALMIC ACID;Ophthalmic acid	+	288.118	288.119	437.329	439.133	3	9092;17095;19286	74.02462;102.0552;112.0402;115.0878;125.0722;126.0047;128.0348;139.0883;141.0665;145.0605;146.0464;151.0865;159.0775;167.0459;169.0992;195.0774;208.1091;213.0888;226.1201;270.1096;288.1209|272.579171708691;51.7356084868247;31.4848971126807;352.969834828806;103.955688314672;35.9093220503809;362.610878210234;30.7774359742837;244.468184987041;31.4318236683278;39.6771723414702;213.853140811193;563.98…	1	0.00201627	0.00961243	0.0133662	0.00629813	0.0399958	-0.011398	4.77186	0	0.269103	4.84625	1	0.316722	4.77186	0	0.285714	4.88924	2	0.361019	#NUM!	0		4.77186	0	0.27464	4.86774	3	0.323367	4.80905	1	0.290144	4.83055	2	0.3134	0.340893	0.467382	0.699275
FT329	FT329	366.525	417.15	fluticasone 17beta-carboxylic acid;Ochrephilone;MLS000876965		417.15	417.15	364.423	369.289	4	1766;11359;12023;13421	75.00841;85.0292;113.0242;155.046;198.114;241.1191;330.1556;331.1387;373.1614;417.1505|304.034540886922;228.742516295599;333.53262518817;296.303955980707;263.052095807024;2224.55000548722;2113.96585513631;2030.04830148894;3005.52236616884;5805.98135163005	1	0.0140022	0.0058774	0.00304112	-0.00836835	-0.0235068	0.000620419	4.45839	1	0.06866	4.39205	0	0.0420819	4.58967	3	0.161683	4.39205	0	0.0575858	#NUM!	0		4.52403	4	0.0952381	4.39205	0	0.0420819	4.42522	1	0.0454042	4.49086	3	0.0885936	0.340893	0.467382	0.699275
FT292	FT292	49.1913	351.217	Prostaglandin E2;(13E)-11a-Hydroxy-9,15-dioxoprost-13-enoic		351.213	351.217	49.1124	49.9548	3	6768;17162;18578	113.0967;135.0816;163.1123;175.1125;187.1107;189.1283;191.1424;204.1161;206.1311;207.1021;217.1592;233.119;235.1339;255.2326;271.2068;315.1973;333.2072;351.2175;351.3291|69.1599947582482;131.109292637987;124.539684750849;488.308496633228;70.2447843429695;1354.16629135055;94.2748027709172;126.286932544264;67.6844205121483;201.310892683313;212.447529068213;176.734959518778;431.479599264249;1933.563…	1	-0.00815304	-0.00956293	0.0186036	0.015999	-0.000737523	-0.00890387	4.79882	0	0.289037	4.87034	1	0.335548	4.79882	0	0.312292	4.90575	2	0.375415	#NUM!	0		4.79882	0	0.300111	4.88804	3	0.357697	4.83458	1	0.311185	4.85229	2	0.335548	0.340893	0.467382	0.699275
FT298	FT298	77.0219	353.233	NCGC00384809-01!5-[5-hydroxy-3-(hydroxymethyl)pentyl]-8a-(hy	+	353.233	353.233	77.0219	77.0219	1	4083	83.05046;165.1279;171.1009;171.1045;173.1332;181.1232;183.1023;191.1437;193.1236;193.1611;209.1188;219.1763;221.1188;229.1966;235.1358;247.2067;255.2127;263.2023;265.2159;273.0794;273.1882;273.2215;291.1983;299.204;309.2079;317.2113;335.2212;353.2021;353.2338|40.6612707967241;160.82628868599;67.3556981842424;63.6855211466283;37.6617795144909;38.5212532316302;38.7312218590409;57.0309040210589;432.…	1	-0.00871357	-0.00674501	-0.0104139	-0.0136706	-0.000776774	-0.00295401	4.96665	1	0.414175	4.88106	0	0.354374	4.88106	0	0.39258	4.88106	0	0.34773	#NUM!	0		4.92386	1	0.390919	4.88106	0	0.342193	4.92386	1	0.387597	4.88106	0	0.371539	0.340893	0.467382	0.699275
FT487	FT487	248.39	559.304			559.303	559.304	247.721	249.115	5	8611;11478;14936;17328;19488	152.995;227.0325;245.042;287.2761;331.2639;557.583;559.305|565.071541101256;167.436416676196;147.594627925099;234.479497755393;9611.53383440688;95.4170201495344;11246.8912351117	1	0.012358	-0.0206121	0.0311648	0.00944821	0.0830934	0.0324269	4.88106	0	0.351606	4.96424	1	0.430786	5.0791	2	0.542636	5.11882	2	0.54928	#NUM!	0		4.98008	2	0.447398	5.04153	3	0.501661	4.92265	1	0.386489	5.09896	4	0.548173	0.340893	0.467382	0.699275
FT729	FT729	46.6877	792.569	PE(20:0/P-18:1(11Z));PE(20:0/P-18:1(9Z));PE(20:1(11Z)/P-18:0	+	792.556	792.575	45.3144	47.8743	12	616;3626;12983;13739;14390;15126;15915;16724;17538;18180;18960;19654	168.0426;224.0698;253.2165;254.2203;255.2327;256.2355;279.2318;281.2484;303.2343;329.2493;462.2971;480.3091;716.3185;716.5338;717.5291;718.5403;733.5033;742.5381;792.4951;792.5761|203.708088930335;144.917698080826;702.847441231486;672.023899314517;25921.9511922214;372.155116125052;195.53757279582;163.770733414401;256.541903142363;281.067840312141;670.325589028951;1978.43423198242;252.348468484797…	1	0.003185	-0.0349791	0.0159813	0.0608443	0.0464109	0.0215109	4.99749	1	0.439646	4.88106	0	0.354374	5.28844	4	0.672204	5.50901	6	0.757475	#NUM!	0		5.14296	5	0.562569	5.19504	6	0.601329	4.93927	1	0.399779	5.39873	10	0.722038	0.340893	0.467382	0.699275
FT125	FT125	416.274	215.065	4,4`-Thiodianiline;(R)-3-Hydroxy-5-phenylpentanoic acid;2,5-		215.064	215.065	415.468	417.031	3	6607;12470;18433	74.02482;118.0509|3036.16511439179;2984.20356092467	1	-0.0100953	-0.0137777	0.0121414	0.0286743	-0.0192213	-0.0122166	4.74829	0	0.252492	4.82545	1	0.301218	4.79846	1	0.311185	4.84079	1	0.310078	#NUM!	0		4.77338	1	0.276855	4.83312	2	0.306755	4.78687	1	0.272425	4.81963	2	0.30897	0.340893	0.467382	0.699275
FT400	FT400	370.632	484.928	Pesticide4_Fluazinam_C13H4Cl2F6N4O4_2-Pyridinamine, 3-chloro		484.927	484.929	370.59	370.673	2	4208;16434		0	-0.00587738	-0.00897439	-0.0120714	0.000695884	0.00134224	-0.0102655	4.72605	1	0.231451	4.67009	0	0.20155	4.67009	0	0.215947	4.72026	1	0.228128	#NUM!	0		4.69807	1	0.213732	4.69518	1	0.211517	4.69807	1	0.214839	4.69518	1	0.223699	0.340893	0.467382	0.699275
FT610	FT610	45.3122	721.501	[3-[[2,3-dihydroxypropoxy]-hydroxyphosphoryl]oxy-2-hexadecan	+	721.5	721.502	45.2222	45.4022	2	4453;16610	152.9956;171.005;253.2178;254.2195;255.2326;256.2363;391.2261;465.2598;466.2639;483.2736;661.5231;719.2585;720.493;721.5036;721.5903;722.5098|74.2783153750793;40.7321202020455;118.109030822093;102.683045781716;2804.95993091693;53.4538517759643;94.9115521700151;76.2653685129294;30.9025809259651;118.44267185146;77.9477310752782;45.154681940312;40.6743846824611;8802.13083184439;45.2282094123802;52.0…	1	-0.0126936	-0.0242378	-0.0316095	0.0123847	0.00494668	-0.0312489	4.99999	1	0.44186	4.88106	0	0.354374	4.88106	0	0.39258	5.04447	1	0.492802	#NUM!	0		4.94052	1	0.406423	4.96277	1	0.430786	4.94052	1	0.400886	4.96277	1	0.44186	0.340893	0.467382	0.699275
FT636	FT636	274.478	741.551	DG(22:2(13Z,16Z)/22:6(4Z,7Z,10Z,13Z,16Z,19Z)/0:0);DG(22:4(7Z		741.551	741.552	273.207	277.196	6	6173;12165;15050;15846;16633;17463		0	0.0195091	-0.0280994	-0.00704902	-0.0256285	0.0308795	-0.0372947	4.17457	1	0.00775194	4.0614	0	0.00442968	4.2627	2	0.0177187	4.24824	3	0.0143965	#NUM!	0		4.21864	3	0.00885936	4.15482	3	0.0055371	4.11799	1	0.00442968	4.25547	5	0.013289	0.340893	0.467382	0.699275
FT639	FT639	275.166	742.553	PC(15:0/18:2(9Z,12Z));PC(18:2(9Z,12Z)/15:0);PE(14:0/22:2(13Z		742.551	742.554	274.752	275.58	2	6176;16636		0	-0.00169104	-0.0100837	-0.0141708	-0.00203406	0.00806625	-0.0146111	3.92951	1	0.00332226	3.87934	0	0.00221484	3.87934	0	0.00332226	3.93951	1	0.00332226	#NUM!	0		3.90442	1	0.00332226	3.90942	1	0.00221484	3.90442	1	0.00332226	3.90942	1	0.00332226	0.340893	0.467382	0.699275
FT690	FT690	45.2535	770.507	PE(20:4(5Z,8Z,11Z,14Z)/P-18:1(11Z));PE(20:4(5Z,8Z,11Z,14Z)/P		770.507	770.507	45.2222	45.2848	2	6228;16686		0	-0.00537415	-0.030655	-0.0435391	-0.0103911	0.0252396	-0.0437325	5.04264	1	0.464009	4.88106	0	0.354374	4.88106	0	0.39258	5.05485	1	0.504983	#NUM!	0		4.96185	1	0.426357	4.96796	1	0.439646	4.96185	1	0.417497	4.96796	1	0.447398	0.340893	0.467382	0.699275
FT691	FT691	113.202	770.507	PE(20:4(5Z,8Z,11Z,14Z)/P-18:1(11Z));PE(20:4(5Z,8Z,11Z,14Z)/P		770.507	770.507	110.695	114.71	3	6230;12953;18929		0	-0.0192907	-0.0329163	-0.0393555	-0.00125162	0.0255016	-0.0312096	5.07814	1	0.486157	4.88106	0	0.354374	5.05718	1	0.522702	5.02042	1	0.48062	#NUM!	0		5.06766	2	0.517165	4.95074	1	0.415282	4.9796	1	0.431894	5.0388	2	0.507198	0.340893	0.467382	0.699275
FT738	FT738	45.2848	796.522	PE(22:5(4Z,7Z,10Z,13Z,16Z)/P-18:1(11Z));PE(22:5(4Z,7Z,10Z,13		796.522	796.522	45.2848	45.2848	1	6275		0	-0.0036944	-0.0115454	-0.0196849	-0.0340361	0.0146455	-0.0115604	5.00673	1	0.445183	4.88106	0	0.354374	4.88106	0	0.39258	4.88106	0	0.34773	#NUM!	0		4.94389	1	0.408638	4.88106	0	0.342193	4.94389	1	0.403101	4.88106	0	0.371539	0.340893	0.467382	0.699275
FT152	FT152	46.6032	241.12	Pyroglutamyl-Isoleucine;NCGC00386092-01_C11H18N2O4_;2,6-Di-t	+	241.119	241.121	46.2831	46.9233	2	10503;13272	85.00347;155.1079;198.113;223.0272;241.1195;241.2163;241.2223|73.3474527328838;100.650596015856;1889.15246127222;89.4720666037983;4660.43857834043;134.561563688344;43.1473052365902	1	-0.008048	8.89279e-05	0.0114161	-0.00178517	-0.0393754	-0.0362827	4.88106	0	0.351606	5.04218	1	0.497231	5.04586	1	0.513843	4.88106	0	0.34773	#NUM!	0		4.96346	1	0.429679	4.96162	1	0.429679	4.96162	1	0.41639	4.96346	1	0.444075	0.340893	0.467382	0.699275
FT174	FT174	490.021	259.022	STD_Glucose-6-Phosphate;STD_Glucose-1-Phospate;STD_Frct6P	+	259.022	259.022	490.021	490.021	1	1660	78.95903;96.9692;259.0221|1102.31646540818;374.978364746659;383.315647453145	1	-0.00102568	0.00699694	-0.00741379	0.00438891	-0.00197669	0.00332985	4.9353	1	0.388704	4.88106	0	0.354374	4.88106	0	0.39258	4.88106	0	0.34773	#NUM!	0		4.90818	1	0.37763	4.88106	0	0.342193	4.90818	1	0.37763	4.88106	0	0.371539	0.340893	0.467382	0.699275
FT185	FT185	484.422	273.002	D-Glucuronic acid 1-phosphate;Nitrofurantoin;D-Erythro-imida		273.001	273.002	484.082	485.121	3	4944;13299;14723	78.95881;85.02945;96.96937;175.0234|1782.04574223222;33.3798322823924;2116.61288647586;43.4352692651828	1	0.00453552	-0.0144424	-0.0010911	-0.00829417	-0.0152424	0.00833006	4.53726	1	0.10299	4.48511	0	0.0753045	4.61893	2	0.180509	4.48511	0	0.0952381	#NUM!	0		4.5781	3	0.129568	4.48511	0	0.0841639	4.51119	1	0.0808416	4.55202	2	0.126246	0.340893	0.467382	0.699275
FT301	FT301	100.159	354.236	4-[(E)-3-hydroxy-8,10-dimethyl-2-(methylamino)dodec-6-enyl]p		354.236	354.237	100.072	102.239	3	8475;14810;18586		0	0.00173531	-0.0128624	0.0119697	0.00570199	0.00614973	0.000454577	4.5023	0	0.089701	4.56391	1	0.128461	4.55248	1	0.133998	4.57596	1	0.145072	#NUM!	0		4.52739	1	0.0974529	4.56994	2	0.124031	4.53311	1	0.0908084	4.56422	2	0.133998	0.340893	0.467382	0.699275
FT305	FT305	475.103	362.048	Alpha-hydroxymidazolam;4-hydroxymidazolam;Guanosine monophos		362.048	362.049	474.683	475.471	3	1019;7648;19358		0	-0.0218321	0.00336598	0.0271449	-0.0293063	-0.00527874	-0.00883326	3.80073	0	0.00221484	3.97431	1	0.00332226	3.80073	0	0.00221484	3.8509	1	0.00221484	#NUM!	0		3.80073	0	0.00221484	3.91261	2	0.00332226	3.88752	1	0.00221484	3.82582	1	0.00221484	0.340893	0.467382	0.699275
FT571	FT571	255.342	688.491	PC(14:1(9Z)/15:0);PC(15:0/14:1(9Z));PE(14:0/18:1(11Z))		688.491	688.492	252.315	258.368	2	3509;12850	227.2025;253.2173;255.233;281.2496;688.4929|55.832645994974;344.726594470005;114.991292757347;36.7072449387024;867.740345755089	1	-0.00596001	0.00723418	-0.00730623	0.0135374	0.00262126	0.00572757	4.67086	1	0.187154	4.61956	0	0.161683	4.66973	1	0.213732	4.61956	0	0.17165	#NUM!	0		4.67029	2	0.197121	4.61956	0	0.159468	4.64521	1	0.170543	4.64464	1	0.188261	0.340893	0.467382	0.699275
FT686	FT686	113.202	769.504	PG(16:0/20:4(5Z,8Z,11Z,14Z));PG(16:1(9Z)/20:3(5Z,8Z,11Z));PG		769.504	769.504	110.695	114.71	3	6226;12950;18925	152.9956;171.0064;205.1958;227.0335;253.2184;255.2328;257.2361;259.2429;277.2175;279.233;281.2474;285.2199;301.2151;302.2175;303.2335;305.2454;391.2245;409.2385;415.2262;417.2401;439.2229;465.2625;483.2721;487.2456;489.2627;507.273;509.2856;513.2659;531.2721;695.465;767.1268;769.5059;769.5733;770.4673;770.5044;771.5171;773.5442|710.938041423778;220.908556736597;118.179474097602;170.395619970441;1…	1	-0.025708	-0.0440171	-0.0499162	0.00153817	0.0321013	-0.0418396	5.13358	1	0.524917	4.88106	0	0.354374	5.11282	1	0.568106	5.07602	1	0.513843	#NUM!	0		5.1232	2	0.550388	4.97854	1	0.45072	5.00732	1	0.451827	5.09442	2	0.541528	0.340893	0.467382	0.699275
FT724	FT724	255.773	789.549	PA(22:1(13Z)/19:2(10Z,13Z));SM(d18:0/20:2(11Z,14Z))		789.547	789.551	254.861	256.686	2	7168;15121		0	-0.00535262	-0.0161524	0.0251626	0.0188543	-0.0329762	-0.00371526	4.15534	0	0.0055371	4.32544	1	0.0221484	4.20551	1	0.00664452	4.15534	0	0.00775194	#NUM!	0		4.18043	1	0.00664452	4.24039	1	0.0121816	4.24039	1	0.00885936	4.18043	1	0.00775194	0.340893	0.467382	0.699275
FT817	FT817	244.753	864.57	PS(16:1(9Z)/24:1(15Z));PS(18:0/22:2(13Z,16Z));PS(18:1(11Z)/2		864.569	864.57	244.672	244.834	2	1419;11008	135.03;253.2156;255.2275;279.2325;281.2509;301.2159;303.2318;714.4933;790.5359;864.4474;864.5663|258.908396604841;38.8488200077234;45.7274562067369;49.470414574634;42.3543779696615;40.90979446853;146.594939808222;38.2540814338654;924.300767731341;42.077427843742;1514.88986052504	1	-0.00372996	0.00672776	-6.55251e-05	0.00675964	-0.0129136	-0.025175	4.88106	0	0.351606	4.96755	1	0.435216	4.88106	0	0.39258	4.88106	0	0.34773	#NUM!	0		4.88106	0	0.35825	4.92431	1	0.385382	4.92431	1	0.388704	4.88106	0	0.371539	0.340893	0.467382	0.699275
FT389	FT389	49.8729	473.235	Rubraflavone B;(E)-5-hydroxy-N-[3-[5-[3-[[(E)-5-hydroxy-3-me		473.234	473.236	48.5571	51.1887	2	5094;14165	182.1185;225.1238;473.2361|80.0939263913065;842.498443478048;471.266619642762	1	0.0132237	-0.00383467	-0.0232732	-0.000631624	-0.011511	0.0174235	4.59231	1	0.138427	4.50461	0	0.0874862	4.55478	1	0.136213	4.50461	0	0.10742	#NUM!	0		4.57355	2	0.128461	4.50461	0	0.0963455	4.54846	1	0.0963455	4.5297	1	0.109635	0.340893	0.467382	0.699275
FT414	FT414	494.829	499.064	Quercetin 3-galactoside;Myricetin 7-rhamnoside;Myricitrin		499.064	499.064	494.682	494.976	2	4225;18692		0	-0.00814059	-0.0103026	-0.00353725	-0.00341774	-0.00338888	-0.00804811	4.72733	1	0.233666	4.66966	0	0.200443	4.66966	0	0.211517	4.71983	1	0.225914	#NUM!	0		4.6985	1	0.214839	4.69474	1	0.209302	4.6985	1	0.215947	4.69474	1	0.222591	0.340893	0.467382	0.699275
FT421	FT421	502.916	505.988	Adenosine triphosphate;dGTP;2-hydroxy-dATP		505.988	505.988	502.916	502.916	1	9246	78.9596;96.96965;110.024;128.0354;134.0462;158.925;174.9789;176.9362;184.9855;238.8931;240.0506;272.9571;302.052;320.064;328.0452;408.0119;426.0232;487.9817;504.4396;505.9893|131.15907376126;35.0941909872063;110.967394166421;78.4281667339897;141.00338704372;1743.84889571466;36.7483234433962;178.980017308635;159.91619000138;127.297616173176;249.342165890292;398.012146553722;153.136129002419;93.376…	1	0.0037438	0.0144175	0.00438933	0.00379699	0.00798528	-0.0116895	4.88106	0	0.351606	4.97622	1	0.44186	4.88106	0	0.39258	4.88106	0	0.34773	#NUM!	0		4.88106	0	0.35825	4.92864	1	0.390919	4.92864	1	0.393134	4.88106	0	0.371539	0.340893	0.467382	0.699275
FT490	FT490	248.101	560.307	NCGC00380724-01_C28H47NO8_(3R,5R,6S,7S,9R,11E,13S,14R)-14-Et		560.306	560.308	247.073	249.115	4	8614;11481;17331;19491		0	0.00274936	-0.00115497	0.0204564	0.00400203	0.0545377	0.0177887	4.55802	0	0.119601	4.61174	1	0.147287	4.60819	1	0.174972	4.73534	2	0.236988	#NUM!	0		4.5831	1	0.13732	4.67354	3	0.193798	4.58488	1	0.119601	4.67177	3	0.204873	0.340893	0.467382	0.699275
FT583	FT583	268.477	699.496	PA(18:0/18:2(9Z,12Z));PA(18:1(11Z)/18:1(11Z));PA(18:1(11Z)/1		699.496	699.496	268.477	268.477	1	9370	78.95984;152.9949;279.2328;280.2357;281.2479;282.2577;283.2641;415.2227;417.2423;419.2585;433.2342;435.2506;437.2677;509.3443;649.3905;649.4215;699.372;699.4089;699.4989|32.9144897503369;301.799294368077;150.286773723784;32.4132621668582;1298.51066067365;52.3306493470614;492.595249553926;54.8935214720245;623.35118640539;288.72628838962;31.5399928758325;174.753012975933;155.499632870112;37.9985812…	1	0.00348013	0.0134021	0.0040802	0.00352957	0.00742289	-0.0108662	4.88106	0	0.351606	4.96952	1	0.436323	4.88106	0	0.39258	4.88106	0	0.34773	#NUM!	0		4.88106	0	0.35825	4.92529	1	0.387597	4.92529	1	0.390919	4.88106	0	0.371539	0.340893	0.467382	0.699275
FT736	FT736	45.2848	795.519	PG(16:0/22:5(4Z,7Z,10Z,13Z,16Z));PG(16:0/22:5(7Z,10Z,13Z,16Z		795.519	795.519	45.2848	45.2848	1	6273	255.2338;256.2364;259.245;279.2321;281.2494;283.2663;303.2338;305.2504;329.248;331.2671;721.5546;795.5235;795.6307;795.6603|142.114516953406;30.9941246883682;40.6640815765172;260.481639263708;541.90029480819;32.5875605298734;654.792716434775;177.969897460829;143.334667570318;50.5633394500251;171.860523399437;7987.96204116197;82.7144866671574;47.4926358691391	1	-0.00542317	-0.016948	-0.0288963	-0.0499631	0.0214988	-0.01697	5.06553	1	0.478405	4.88106	0	0.354374	4.88106	0	0.39258	4.88106	0	0.34773	#NUM!	0		4.9733	1	0.438538	4.88106	0	0.342193	4.9733	1	0.425249	4.88106	0	0.371539	0.340893	0.467382	0.699275
FT037	FT037	405.388	130.061	Beta-Guanidinopropionic acid;Creatine;1,2,5-Trimethyl-1H-pyr	+	130.061	130.061	405.388	405.388	1	9662	88.04049|1159.0461434109	1	-0.00159171	-1.82765e-05	0.00328659	0.00160165	0.000288879	0.00150842	4.6494	0	0.178295	4.69958	1	0.220377	4.6494	0	0.196013	4.6494	0	0.184939	#NUM!	0		4.6494	0	0.184939	4.67449	1	0.196013	4.67449	1	0.192691	4.6494	0	0.191584	0.340893	0.467382	0.699275
FT079	FT079	475.171	168.991	STD_Malic acid ;STD_L-malic acid;D-Glyceraldehyde 3-phosphat		168.991	168.991	475.171	475.171	1	3861		0	-0.00510762	-0.00395371	-0.00610432	-0.00801329	-0.000455321	-0.00173155	4.27708	1	0.0110742	4.2269	0	0.00885936	4.2269	0	0.0110742	4.2269	0	0.0121816	#NUM!	0		4.25199	1	0.00996678	4.2269	0	0.00996678	4.25199	1	0.0110742	4.2269	0	0.00996678	0.340893	0.467382	0.699275
FT094	FT094	335.562	186.045	chondroitin sulfate E (GalNAc4,6diS-GlcA), precursor 5a;1-(M		186.045	186.045	335.376	335.749	2	1581;11868		0	0.0103438	0.00945086	-0.00475114	-0.00192723	-0.00636659	-0.0108639	4.38008	1	0.03433	4.3299	0	0.0243632	4.38082	1	0.0387597	4.3299	0	0.0332226	#NUM!	0		4.38045	2	0.0310078	4.3299	0	0.0254707	4.35499	1	0.0254707	4.35536	1	0.0310078	0.340893	0.467382	0.699275
FT103	FT103	491.655	195.051	D-GULONIC ACID GAMA-LACTONE;Galactonic acid;Gluconic acid	+	195.051	195.051	491.655	491.655	1	5616	59.01347;75.00869;78.95858;129.0185;195.0507|55.7246968224824;146.549604345131;43.2000318913403;32.5116041177523;71.9154811379639	1	-0.001475	-0.00460954	-0.00785925	-0.013589	0.00584727	-0.00461551	4.651	1	0.180509	4.60083	0	0.142857	4.60083	0	0.16722	4.60083	0	0.159468	#NUM!	0		4.62592	1	0.166113	4.60083	0	0.147287	4.62592	1	0.155039	4.60083	0	0.158361	0.340893	0.467382	0.699275
FT120	FT120	90.2073	212.004	Indoxyl sulfate;Carmustine		212.004	212.004	90.2073	90.2073	1	3104		0	-0.00382398	0.00674516	-0.00208848	0.00320009	-0.000359445	0.00455751	4.64517	1	0.174972	4.595	0	0.139535	4.595	0	0.165006	4.595	0	0.153931	#NUM!	0		4.62008	1	0.161683	4.595	0	0.143965	4.62008	1	0.146179	4.595	0	0.155039	0.340893	0.467382	0.699275
FT156	FT156	100.595	242.176	N-Undecanoylglycine		242.176	242.176	99.0985	102.092	2	5664;17817	181.1587;224.1658;225.1492;242.1758|289.692178337165;88.22964905346;639.594322666427;602.637669762866	1	0.00567099	-0.00458356	0.00155148	-0.0136346	0.0082454	0.00656069	4.48317	1	0.0786268	4.433	0	0.0598007	4.433	0	0.0631229	4.5137	1	0.110742	#NUM!	0		4.45808	1	0.0598007	4.47335	1	0.0808416	4.45808	1	0.0598007	4.47335	1	0.0830565	0.340893	0.467382	0.699275
FT158	FT158	323.657	243.062	Pseudouridine;STD_Uridine;Pseudouridine	+	243.062	243.062	323.657	323.657	1	9051	140.0357;153.0294|40.51233315937;375.947065817719	1	0.00197388	0.00760148	0.00231422	0.00200192	0.00421015	-0.00616314	4.28014	0	0.0121816	4.33031	1	0.0254707	4.28014	0	0.0188261	4.28014	0	0.0199336	#NUM!	0		4.28014	0	0.013289	4.30522	1	0.0177187	4.30522	1	0.0166113	4.28014	0	0.0166113	0.340893	0.467382	0.699275
FT220	FT220	66.2758	294.179	N-Isobutyl-2,4,8,10,12-tetradecapentaenamide		294.178	294.18	66.2297	66.3219	2	9099;12544		0	-0.000113425	0.00794439	-0.00295126	0.0124553	0.00725382	-0.0050764	4.38109	0	0.0354374	4.43126	1	0.0586932	4.43218	1	0.0609081	4.38109	0	0.055371	#NUM!	0		4.40664	1	0.0431894	4.40618	1	0.047619	4.40618	1	0.0398671	4.40664	1	0.0498339	0.340893	0.467382	0.699275
FT248	FT248	116.926	311.222	FA 18:2+2O;FA 18:2+2O;13-L-Hydroperoxylinoleic acid	+	311.222	311.222	116.926	116.926	1	10583	183.0112;249.2217;267.2316;293.2135;311.1697;311.2245|31.8881917266026;796.182732751026;35.7808844713531;441.107827967724;115.088018898621;706.06161599263	1	-0.00081602	0.00308638	-0.00222294	0.00516146	-0.00347603	-0.0124812	4.66996	0	0.186047	4.72013	1	0.233666	4.66996	0	0.214839	4.66996	0	0.199336	#NUM!	0		4.66996	0	0.196013	4.69505	1	0.21041	4.69505	1	0.21041	4.66996	0	0.203765	0.340893	0.467382	0.699275
FT256	FT256	43.871	319.23	5,6-Epoxy-8,11,14-eicosatrienoic acid;8,9-Epoxyeicosatrienoi		319.23	319.23	43.871	43.871	1	4039	79.95734;210.9724;318.2519;319.0993;319.137;319.2317;325.1848|678.808705279808;39.1289798147227;46.5560640397598;36.0913469437492;128.082672980466;5234.99373922737;37.9525483744032	1	-0.00510762	-0.00395371	-0.00610432	-0.00801329	-0.000455321	-0.00173155	4.83354	1	0.310078	4.78336	0	0.275748	4.78336	0	0.291251	4.78336	0	0.265781	#NUM!	0		4.80845	1	0.307863	4.78336	0	0.27464	4.80845	1	0.287929	4.78336	0	0.280177	0.340893	0.467382	0.699275
FT273	FT273	103.039	333.207	NCGC00380721-01_C20H30O4_2-Hydroxy-4,5',8a'-trimethyl-1'-oxo	+	333.206	333.208	101.706	105.837	6	4057;14793;15515;17147;17900;19335	175.1131;189.1274;235.1344;271.2069;315.1971;333.2072|148.349622732259;365.265235041264;242.687013333972;1072.01813749713;466.812015124486;1028.81813635646	1	0.00322856	-0.0182581	0.0225414	-0.00253163	0.0539952	0.0101391	4.70991	1	0.221484	4.65974	0	0.192691	4.73279	1	0.251384	4.98369	4	0.448505	#NUM!	0		4.72135	2	0.231451	4.82172	4	0.302326	4.68483	1	0.200443	4.85824	5	0.344408	0.340893	0.467382	0.699275
FT285	FT285	436.303	344.998	O-Ethyl S,S-diphenyl phosphorodithioate;PRZ_M325;Diflubenzur		344.998	344.998	436.303	436.303	1	3242		0	-0.00382398	0.00674516	-0.00208848	0.00320009	-0.000359445	0.00455751	4.39772	1	0.0387597	4.34754	0	0.0299003	4.34754	0	0.0265781	4.34754	0	0.0387597	#NUM!	0		4.37263	1	0.0254707	4.34754	0	0.03433	4.37263	1	0.0287929	4.34754	0	0.0287929	0.340893	0.467382	0.699275
FT362	FT362	409.38	446.072	MMV671636;Se-Adenosylselenomethionine		446.072	446.072	409.38	409.38	1	6841		0	-0.00251147	-0.00227534	0.00708393	0.0050232	-0.0110059	-0.00137533	4.21284	0	0.00885936	4.26301	1	0.0110742	4.21284	0	0.00996678	4.21284	0	0.00996678	#NUM!	0		4.21284	0	0.00775194	4.23792	1	0.0110742	4.23792	1	0.00775194	4.21284	0	0.00885936	0.340893	0.467382	0.699275
FT405	FT405	52.5759	489.21	Methyl cellulose;Ethyl cellulose;NCGC00380952-01_C26H34O9_(1	+	489.21	489.21	52.5759	52.5759	1	5107	182.1184;225.1233;241.1197;283.263;489.2089;489.2504|42.0348528557099;608.400007893667;45.7525214221846;51.0070402140741;85.6521044285159;33.5173180685274	1	0.00397159	-0.000979828	-0.0112125	-0.000768222	-0.00506093	0.00524683	4.61404	1	0.153931	4.56387	0	0.127353	4.56387	0	0.14175	4.56387	0	0.136213	#NUM!	0		4.58896	1	0.142857	4.56387	0	0.121816	4.58896	1	0.122924	4.56387	0	0.13289	0.340893	0.467382	0.699275
FT418	FT418	517.857	503.16	STD_Raffinose;Raffinose;Maltotriose	+	503.16	503.16	517.857	517.857	1	7766	179.0566;221.0669;341.1102;383.1168|171.225886701239;103.888993496059;31.0960720528556;120.287790117891	1	-0.00562538	0.000526581	0.00473167	-0.00727698	-0.00157684	-0.000296891	4.40493	0	0.0420819	4.45511	1	0.0620155	4.40493	0	0.0454042	4.40493	0	0.0664452	#NUM!	0		4.40493	0	0.0409745	4.43002	1	0.0586932	4.43002	1	0.0487265	4.40493	0	0.047619	0.340893	0.467382	0.699275
FT455	FT455	268.295	532.28	Vicriviroc Malate;Cytochalasin Ppho		532.28	532.281	265.968	270.623	2	5135;16483		0	0.00367612	-0.0084666	-0.0198445	0.0150349	-0.00202616	-0.00842359	4.57886	1	0.13289	4.52869	0	0.0996678	4.52869	0	0.116279	4.61099	1	0.166113	#NUM!	0		4.55378	1	0.111849	4.56984	1	0.122924	4.55378	1	0.100775	4.56984	1	0.138427	0.340893	0.467382	0.699275
FT463	FT463	436.303	538.084	Pyranodelphinin B;4beta-(2-Aminoethylthio)epicatechin 3-gall		538.084	538.084	436.303	436.303	1	3398		0	-0.00382398	0.00674516	-0.00208848	0.00320009	-0.000359445	0.00455751	4.47151	1	0.076412	4.42134	0	0.0520487	4.42134	0	0.0564784	4.42134	0	0.06866	#NUM!	0		4.44643	1	0.0575858	4.42134	0	0.0520487	4.44643	1	0.0564784	4.42134	0	0.0575858	0.340893	0.467382	0.699275
FT476	FT476	400.131	554.041			554.04	554.043	399.244	401.018	2	4294;12095		0	0.019465	0.0025277	-0.00152017	-0.021041	-0.0103302	-0.0320736	4.26982	1	0.00996678	4.21965	0	0.00775194	4.33044	1	0.0254707	4.21965	0	0.0110742	#NUM!	0		4.30013	2	0.0166113	4.21965	0	0.00885936	4.24474	1	0.00996678	4.27505	1	0.0155039	0.340893	0.467382	0.699275
FT489	FT489	269.457	560.306	NCGC00380724-01_C28H47NO8_(3R,5R,6S,7S,9R,11E,13S,14R)-14-Et		560.306	560.306	269.457	269.457	1	3419		0	-0.00382398	0.00674516	-0.00208848	0.00320009	-0.000359445	0.00455751	4.63587	1	0.169435	4.5857	0	0.13289	4.5857	0	0.157254	4.5857	0	0.148394	#NUM!	0		4.61078	1	0.156146	4.5857	0	0.133998	4.61078	1	0.13732	4.5857	0	0.150609	0.340893	0.467382	0.699275
FT622	FT622	436.503	731.077	NCGC00384909-01!;NCGC00384909-01!;(1S,11R,14R)-14-(hydroxyme		731.077	731.077	436.503	436.503	1	7978		0	-0.00562538	0.000526581	0.00473167	-0.00727698	-0.00157684	-0.000296891	4.16928	0	0.00664452	4.21945	1	0.00664452	4.16928	0	0.0055371	4.16928	0	0.00885936	#NUM!	0		4.16928	0	0.0055371	4.19437	1	0.00775194	4.19437	1	0.00664452	4.16928	0	0.0055371	0.340893	0.467382	0.699275
FT699	FT699	496.651	773.222	NCGC00169403-02_C35H44O18_beta-D-Glucopyranoside, (1aS,1bS,2		773.222	773.222	496.651	496.651	1	2056		0	-0.000948762	0.00647225	-0.00685784	0.00405979	-0.00182846	0.00308015	4.41842	1	0.0454042	4.36825	0	0.0365449	4.36825	0	0.0332226	4.36825	0	0.0498339	#NUM!	0		4.39334	1	0.0332226	4.36825	0	0.0376523	4.39334	1	0.03433	4.36825	0	0.0332226	0.340893	0.467382	0.699275
FT757	FT757	277.328	814.541	PE(20:2(11Z,14Z)/22:6(4Z,7Z,10Z,13Z,16Z,19Z));PE(20:3(5Z,8Z,		814.541	814.541	277.328	277.328	1	6298		0	-0.001475	-0.00460954	-0.00785925	-0.013589	0.00584727	-0.00461551	4.4014	1	0.0398671	4.35123	0	0.0310078	4.35123	0	0.0287929	4.35123	0	0.0398671	#NUM!	0		4.37631	1	0.0276855	4.35123	0	0.0354374	4.37631	1	0.0299003	4.35123	0	0.0299003	0.340893	0.467382	0.699275
FT796	FT796	107.513	846.549	PC(17:0/12-HETE);PC(18:0/18-HETE);PC(18:0/20-HETE)		846.549	846.549	107.513	107.513	1	7240	189.1295;233.1177;255.2316;271.2068;315.1959;333.2076;351.2176;480.3093;846.4394;846.5543;846.6313|59.8161147824271;69.4083417299282;51.1076006701899;281.666340482707;410.264529102275;403.895618364177;469.09858321161;177.117257570825;36.7383834802013;714.406575904439;36.7427242705844	1	-0.00251147	-0.00227534	0.00708393	0.0050232	-0.0110059	-0.00137533	4.46133	0	0.0708749	4.5115	1	0.0919158	4.46133	0	0.0753045	4.46133	0	0.0885936	#NUM!	0		4.46133	0	0.0620155	4.48641	1	0.0852713	4.48641	1	0.0708749	4.46133	0	0.0797342	0.340893	0.467382	0.699275
FT813	FT813	258.043	861.552	PI(16:0/20:2(11Z,14Z));PI(18:0/18:2(9Z,12Z));PI(18:1(11Z)/18		861.552	861.552	258.043	258.043	1	7253		0	-0.00251147	-0.00227534	0.00708393	0.0050232	-0.0110059	-0.00137533	4.50844	0	0.0941307	4.55861	1	0.121816	4.50844	0	0.10299	4.50844	0	0.109635	#NUM!	0		4.50844	0	0.0841639	4.53352	1	0.105205	4.53352	1	0.0919158	4.50844	0	0.0963455	0.340893	0.467382	0.699275
FT838	FT838	291.984	890.512			890.512	890.512	291.984	291.984	1	9553		0	0.00197388	0.00760148	0.00231422	0.00200192	0.00421015	-0.00616314	4.44322	0	0.0586932	4.49339	1	0.0775194	4.44322	0	0.06866	4.44322	0	0.0775194	#NUM!	0		4.44322	0	0.055371	4.46831	1	0.0786268	4.46831	1	0.0631229	4.44322	0	0.0664452	0.340893	0.467382	0.699275
FT840	FT840	291.984	891.523	Oscillaxanthin;PG(22:5(4Z,7Z,10Z,13Z,16Z)/22:5(4Z,7Z,10Z,13Z		891.523	891.523	291.984	291.984	1	9554		0	0.00197388	0.00760148	0.00231422	0.00200192	0.00421015	-0.00616314	4.76778	0	0.263566	4.81795	1	0.296788	4.76778	0	0.281285	4.76778	0	0.256921	#NUM!	0		4.76778	0	0.27021	4.79286	1	0.282392	4.79286	1	0.275748	4.76778	0	0.266888	0.340893	0.467382	0.699275
FT842	FT842	291.984	892.528			892.528	892.528	291.984	291.984	1	9555		0	0.00197388	0.00760148	0.00231422	0.00200192	0.00421015	-0.00616314	4.47649	0	0.0775194	4.52667	1	0.0974529	4.47649	0	0.0863787	4.47649	0	0.089701	#NUM!	0		4.47649	0	0.0708749	4.50158	1	0.0930233	4.50158	1	0.076412	4.47649	0	0.0841639	0.340893	0.467382	0.699275
FT855	FT855	281.978	903.578			903.578	903.578	281.978	281.978	1	9566		0	0.00197388	0.00760148	0.00231422	0.00200192	0.00421015	-0.00616314	4.6492	0	0.177187	4.69937	1	0.219269	4.6492	0	0.194906	4.6492	0	0.183832	#NUM!	0		4.6492	0	0.183832	4.67428	1	0.194906	4.67428	1	0.190476	4.6492	0	0.190476	0.340893	0.467382	0.699275
FT864	FT864	290.717	915.524	Maduramicin;Vinaginsenoside R16;Vinaginsenoside R17		915.524	915.524	290.717	290.717	1	9577		0	0.00197388	0.00760148	0.00231422	0.00200192	0.00421015	-0.00616314	4.49536	0	0.0852713	4.54553	1	0.111849	4.49536	0	0.0974529	4.49536	0	0.10299	#NUM!	0		4.49536	0	0.0786268	4.52045	1	0.0996678	4.52045	1	0.0863787	4.49536	0	0.0908084	0.340893	0.467382	0.699275
FT867	FT867	291.06	917.541			917.539	917.542	290.137	291.984	2	9579;12310	283.2622;917.3307;917.3987;917.4497;917.543|31.1707126777151;30.5965343854496;40.7968910692944;30.598660478654;2769.53453294956	1	0.0138188	0.0107258	0.00452395	-0.0042779	-0.000549923	-0.0207891	4.55199	0	0.115172	4.60216	1	0.145072	4.60539	1	0.17165	4.55199	0	0.122924	#NUM!	0		4.57869	1	0.130676	4.57708	1	0.128461	4.57708	1	0.115172	4.57869	1	0.145072	0.340893	0.467382	0.699275
FT646	FT646	45.2222	745.503	PG(16:0/18:2(9Z,12Z));PG(16:1(9Z)/18:1(11Z));PG(16:1(9Z)/18:		745.502	745.504	43.5542	45.63	7	550;2019;4494;5277;10885;15057;16644	78.9588;152.9955;171.006;209.0212;227.0316;251.2028;253.2172;254.221;254.4572;255.233;256.2354;257.2388;261.2217;277.2173;278.2206;278.3783;279.2331;280.2367;281.2483;282.2507;283.262;284.2665;303.2334;389.2101;391.2253;409.2328;415.2238;417.2414;463.2462;465.2622;481.2562;481.3097;483.2723;485.2773;489.2607;491.2768;507.272;509.2868;671.4641;685.5362;743.2059;743.268;744.4985;744.5228;745.5053;7…	1	-0.0102365	-0.04031	-0.155505	0.0706221	-0.0220838	-0.0858645	5.57461	3	0.779623	5.15872	1	0.574751	5.1092	1	0.565891	5.17703	1	0.58361	#NUM!	0		5.3419	4	0.687708	5.16788	2	0.581395	5.36667	4	0.698782	5.14312	2	0.582503	0.342861	0.464882	0.699275
FT019	FT019	252.426	112.051	STD_Creatinine	+	112.051	112.052	234.332	255.055	28	18;801;1505;2246;3006;3007;3806;4807;4808;5539;6503;7369;8264;8937;9648;10394;11099;11815;12374;13166;13902;14588;15283;16091;16933;17721;18343;19138	112.0513|7204.84554537623	1	0.0138139	0.0484038	-0.027277	-0.00811018	-0.00558068	-0.00572753	5.20332	6	0.576966	5.10407	6	0.537099	5.06118	6	0.526024	4.91947	6	0.390919	#NUM!	0		5.13225	12	0.55371	5.01177	12	0.477298	5.1537	12	0.557032	4.99033	12	0.471761	0.343784	0.463715	0.699275
FT317	FT317	129.676	383.243	NCGC00347582-02![4,5-dihydroxy-3,4-bis(hydroxymethyl)-4a,8,8		383.242	383.244	125.668	138.11	20	266;1031;3265;4102;5826;6792;7662;8488;9890;10636;11347;12011;12627;14824;15555;16356;17183;17930;18602;19369	83.04992;105.0709;163.1125;187.1489;189.1284;205.1595;215.1076;233.1182;245.191;271.2066;283.1546;297.1863;315.1966;333.2071;351.2169;365.2321;383.2437;383.2789|1612.31082879677;407.587867708054;745.091578469808;7435.80768076829;1945.77385000347;3267.83558668894;2867.16906354407;1854.32468352804;2372.77301595309;2621.29640988243;1140.82718046306;581.229331275009;7537.59292165588;2787.31597099306;…	1	-0.0212105	-0.0412366	0.0354827	-0.00259942	0.0753947	-6.00107e-05	4.76365	3	0.261351	4.977	5	0.442968	4.93049	4	0.438538	5.18027	6	0.586932	#NUM!	0		4.84707	7	0.334441	5.07863	11	0.521595	4.87032	8	0.339978	5.05538	10	0.51938	0.345153	0.461988	0.699275
FT869	FT869	245.432	919.613			919.611	919.616	243.066	247.195	26	736;1459;2187;2942;3738;4721;5460;6414;7296;8192;8895;9582;10344;11044;11768;12313;13103;13861;14516;15229;16027;16853;17673;18299;19086;19760		0	-0.00496595	-0.0149651	0.00527713	0.00257719	-0.00591328	0.0153537	5.44988	6	0.726467	5.50538	6	0.75969	5.45679	6	0.767442	5.51614	6	0.761905	#NUM!	0		5.45334	12	0.756368	5.51076	12	0.76412	5.47763	12	0.749723	5.48647	12	0.761905	0.345191	0.461941	0.699275
FT354	FT354	287.227	437.286	Oryzarol;beta-Carotinal;Apo-8'-lycopenal		437.285	437.287	285.177	289.136	24	295;1059;1787;2525;3299;4150;5064;5863;6833;7704;8514;9197;9918;10666;11381;12664;14138;14854;15591;16391;17224;17957;18636;19400		0	-0.0270752	0.00307934	0.00182205	0.022503	0.0331232	0.0159072	5.11003	6	0.503876	5.16184	6	0.579181	4.92675	4	0.435216	5.18092	6	0.58804	#NUM!	0		5.01839	10	0.471761	5.17138	12	0.590255	5.13593	12	0.542636	5.05383	10	0.516058	0.34632	0.460522	0.699275
FT705	FT705	68.7134	774.537	PE(20:2(11Z,14Z)/P-18:1(11Z));PE(20:2(11Z,14Z)/P-18:1(9Z));P		774.536	774.54	66.2496	70.3871	9	3605;8045;8774;9445;11643;14369;15893;17516;19644		0	0.00833952	0.0185337	0.0365189	0.0100927	0.0832323	0.0559232	4.97099	1	0.417497	5.10707	3	0.541528	5.10591	2	0.562569	5.28183	3	0.653378	#NUM!	0		5.03845	3	0.48948	5.19445	6	0.600221	5.03903	4	0.479513	5.19387	5	0.609081	0.346944	0.459741	0.699275
FT155	FT155	68.0276	242.122	Agomelatine;Procarbazine;Dioscorine		242.122	242.124	64.2952	69.0801	26	131;906;1638;2361;3133;3941;4922;5662;6637;7506;8362;9046;9751;10504;11216;11908;12492;13273;14006;14696;15407;16209;17051;17816;18462;19245		0	-0.0166718	0.0255362	-0.0279293	-0.0153486	-0.0161557	-0.0258269	5.61108	6	0.800664	5.45278	6	0.733112	5.60647	6	0.822813	5.31894	6	0.671096	#NUM!	0		5.60878	12	0.817276	5.38586	12	0.713178	5.53193	12	0.772979	5.4627	12	0.754153	0.347204	0.459415	0.699275
FT074	FT074	253.256	166.017	Homocysteinesulfinic acid;N-Acetyltaurine;Thioguanine		166.017	166.018	251.916	255.329	8	66;1560;3062;4859;5588;6558;8309;15335	79.95741;106.9808;166.0176|2464.75224427202;201.575242034207;1091.56837108091	1	-0.0103131	0.0243772	-0.025567	0.00164244	-0.0365383	0.0398768	4.59969	4	0.142857	4.43025	2	0.0575858	4.24328	0	0.013289	4.35582	1	0.0431894	#NUM!	0		4.42148	4	0.047619	4.39303	3	0.0442968	4.51497	6	0.0841639	4.29955	1	0.0199336	0.347463	0.459092	0.699275
FT366	FT366	443.106	449.113	(±)-Flufenprox;N-desalkyl delavirdine;Miscanthoside		449.112	449.114	442.553	443.89	5	3307;5069;7714;13450;14141		0	-0.00100291	0.00565624	-0.0129262	-0.00810021	-0.0236249	0.0285665	4.89474	2	0.365449	4.77764	1	0.27021	4.85832	2	0.362126	4.72747	0	0.232558	#NUM!	0		4.87653	4	0.349945	4.75255	1	0.246955	4.83619	3	0.312292	4.7929	2	0.290144	0.348439	0.457874	0.699275
FT097	FT097	38.2368	187.007	p-Toluenesulfonic acid;p-Cresol sulfate;Benzyl sulfate	+	187.007	187.008	35.551	41.0903	26	83;863;1583;2310;3080;3883;4879;5607;6578;7448;8323;9001;9707;10457;11168;11870;12445;13226;13964;14651;15356;16162;17003;17779;18410;19202	77.03953;79.95722;80.96509;95.95224;105.0343;106.042;107.0501;187.0068|6420.7167069947;37194.4738486695;8495.83113472487;64690.1793800505;3861.49287328975;4252.95812529359;145812.802251767;140949.96840797	1	-0.00506957	0.0578611	-0.0113325	-0.0276328	0.0179192	0.031931	5.83575	6	0.878184	5.69422	6	0.839424	5.61281	6	0.826135	5.51311	6	0.75969	#NUM!	0		5.72428	12	0.856035	5.60367	12	0.805094	5.76498	12	0.864895	5.56296	12	0.79402	0.349469	0.456591	0.699275
FT723	FT723	290.674	789.548	PA(22:1(13Z)/19:2(10Z,13Z))		789.547	789.567	275.58	293.122	29	612;1343;2077;2078;2826;3621;4576;5348;6264;7167;8059;8786;9462;10217;10938;11654;12211;12977;13735;14386;15120;15910;16717;16718;17532;18175;18176;18955;19650		0	0.00492282	-0.0142246	-0.0163975	0.00182802	-0.00354108	-0.0162089	5.59153	6	0.78959	5.51942	6	0.770764	5.61857	6	0.829457	5.58563	6	0.788483	#NUM!	0		5.60505	12	0.815061	5.55252	12	0.777409	5.55547	12	0.781838	5.6021	12	0.818383	0.350997	0.454696	0.699275
FT157	FT157	228.734	243.062	STD_Uridine;Uridine (Not validated);URIDINE	+	243.062	243.063	217.545	235.969	26	133;909;1640;2363;3136;3944;4925;5665;6642;7508;8363;9050;9755;10507;11219;11910;12495;13276;14008;14698;15410;16211;17053;17818;18465;19246	66.03498;82.02974;110.0244;111.0197;122.0246;124.04;140.035;152.035;200.0557;243.0621|2334.43337529612;7283.78849808239;13060.9929572193;1098.71841074821;2455.81997550774;636.936910255431;1580.48232548618;2884.03520114253;2436.49736822796;923.759131638805	1	-0.0124439	-0.028912	0.0038084	-0.0303638	-0.0655121	0.0171014	6.02266	6	0.924695	5.88157	6	0.895903	6.04068	6	0.939092	5.90594	6	0.898117	#NUM!	0		6.03167	12	0.932447	5.89376	12	0.89701	5.95212	12	0.910299	5.97331	12	0.922481	0.351878	0.453608	0.699275
FT104	FT104	286.772	196.028	4-Acetylimidazo[4,5-c]pyridine;3-Hydroxy-2-methylpyridine-4,		196.028	196.029	270.092	289.511	22	89;869;1591;2317;3088;3890;4884;4885;5617;6583;7457;9009;9712;9713;10462;11175;12452;13231;13969;15365;16168;18415	79.95724;80.96495;106.9809;124.0068;152.0022;196.0283|4265.30646178037;393.519997723028;480.862119135872;4861.30198190685;1185.89091837784;3330.71608145647	1	-0.0512981	-0.0079322	-0.0181172	0.0308789	-0.0878673	-0.043463	4.7783	6	0.275748	4.91567	5	0.395349	4.69776	4	0.23588	4.71997	3	0.227021	#NUM!	0		4.73803	10	0.239203	4.81782	8	0.299003	4.84699	11	0.325581	4.70887	7	0.230343	0.352092	0.453343	0.699275
FT379	FT379	428.419	460.166	3-cis-Hydroxyglipizide;4-trans-Hydroxyglipizide;Morphine-3-g		460.165	460.167	417.031	431.36	17	318;1081;1809;4181;5082;5895;7732;8537;9216;10685;11404;12046;12688;13465;14154;17973;19421	74.02463;113.024;118.0505;161.0455|1867.13288511068;1254.25040377922;11198.6446457456;2147.52318395922	1	0.0345377	0.0221679	-0.00394912	-0.0293492	-0.0218506	0.00703141	4.63917	4	0.170543	4.80118	4	0.289037	4.87993	5	0.379845	4.54302	2	0.121816	#NUM!	0		4.75955	9	0.260244	4.6721	6	0.190476	4.72017	8	0.233666	4.71148	7	0.231451	0.353023	0.452197	0.699275
FT410	FT410	462.41	497.1	Artomunoxanthentrione epoxide;N,N'-Bis(gamma-glutamyl)cystin		497.098	497.1	461.499	463.499	6	2577;6884;9966;15641;16443;18689	114.056;128.035;143.0454;160.0062;175.0175;179.0452;192.0333;197.0566;210.0896;254.0783;272.0885;304.0612;306.0768;338.0494;497.1023|229.111462657938;364.597560974416;360.456646170276;70.2821491151099;185.24697493516;184.738969738174;520.106737374567;77.9958089962975;90.295186785977;276.428723122893;675.337141724961;2096.72601222002;138.445192593474;72.7477614192935;1829.40842036789	1	-0.0124038	-0.0086158	0.0147452	0.0196869	-0.0228688	-0.0099399	4.69107	1	0.20598	4.80129	2	0.290144	4.6409	0	0.188261	4.81324	3	0.290144	#NUM!	0		4.66599	1	0.190476	4.80726	5	0.296788	4.74618	3	0.246955	4.72707	3	0.236988	0.353134	0.45206	0.699275
FT469	FT469	400.017	551.032	[5-(3-{[3,4-dihydroxy-5-(hydroxymethyl)oxolan-2-yl]oxy}-5,7-		551.03	551.034	397.803	401.163	26	397;1151;1881;2628;3404;4289;5145;5987;6936;7815;8602;9278;10014;10755;11468;12092;12762;13536;14205;14924;15693;16496;17319;18018;18742;19478	59.01455;140.59;141.0172;141.6167;141.6872;222.3407;223.0204;304.0898;305.0237;385.8392;387.0266;469.0293;551.0319|266548.64148503;11828.607032743;3885723.85676984;1568.84549833649;1105.61202443067;3980.28317594645;1099472.58976423;5558.168066876;1663109.33833267;3986.58945655182;1091249.70466409;175371.879632236;22504.8757357099	1	0.00466518	0.0237956	-0.00312626	0.00586364	-0.00969927	-0.0173478	6.84254	6	0.998893	6.89653	6	0.998893	6.83914	6	0.998893	6.79757	6	0.996678	#NUM!	0		6.84084	12	1	6.84705	12	0.996678	6.86953	12	0.998893	6.81836	12	0.998893	0.35341	0.451721	0.699275
FT656	FT656	239.494	752.553	PC(15:0/P-18:0);PE(18:0/P-18:0);PE(20:0/P-16:0)		752.548	752.555	232.85	241.675	25	558;1300;2029;2783;3574;4511;5289;6197;7119;8009;8744;10170;10899;11608;12176;12930;13683;14330;15068;15860;16660;17479;18136;18904;19612		0	0.018787	-0.0523155	-0.00650002	-0.0162179	-0.00952408	0.01069	5.28602	6	0.631229	5.15962	5	0.576966	5.49272	6	0.778516	5.42734	6	0.723145	#NUM!	0		5.38937	12	0.717608	5.29348	11	0.671096	5.22282	11	0.605759	5.46003	12	0.751938	0.353601	0.451486	0.699275
FT303	FT303	464.167	356.992			356.99	356.993	462.822	466.111	25	254;1018;1746;2479;3255;4088;5027;5810;6778;7647;8477;9163;9880;10625;11334;12615;13394;14104;14812;15540;16344;17172;17921;18588;19357	78.95896;79.9572;96.96032;138.9799;168.9903;199.0013;241.0112;259.0223;356.9892|6083.6717072908;559.935367412277;44818.3111987436;1163.48139064244;776.453435993693;1348.68643135042;756.272988261077;19257.1041758457;582.423776967414	1	-0.0349939	-0.0699172	0.03293	-0.0134399	-0.0030419	0.0284339	5.12422	6	0.516058	5.28292	6	0.651163	5.18008	5	0.611296	5.40455	6	0.719823	#NUM!	0		5.15215	11	0.568106	5.34374	12	0.682171	5.20357	12	0.594684	5.29232	11	0.671096	0.355926	0.44864	0.702298
FT077	FT077	525.121	168.043	Phosphodimethylethanolamine;L-2-Amino-5-hydroxypentanoic aci		168.042	168.043	520.026	529.439	22	68;847;1561;2293;3065;3860;4861;5590;6560;7429;8310;9692;10442;11152;12428;13210;13947;14637;15338;16147;16985;18393	78.95896|9272.06849194895	1	-0.0603992	-0.0205016	-0.0280839	0.00348468	-0.0374407	0.0169508	5.63631	6	0.811739	5.50525	5	0.758583	5.39109	5	0.72979	5.36683	4	0.700997	#NUM!	0		5.5137	11	0.777409	5.43604	9	0.736434	5.57078	11	0.78959	5.37896	9	0.716501	0.357143	0.447158	0.703125
FT548	FT548	400.017	634.04			634.038	634.041	397.803	401.163	26	466;1211;1945;2695;3481;4382;5201;6072;7019;7907;8664;9330;10078;10809;11527;12129;12827;13601;14253;14980;15766;16557;17388;18067;18815;19531		0	0.00490373	0.0244129	-0.00362421	0.00624698	-0.0097492	-0.017995	6.03696	6	0.928018	6.09253	6	0.939092	6.03358	6	0.936877	5.99104	6	0.916944	#NUM!	0		6.03527	12	0.933555	6.04178	12	0.92691	6.06474	12	0.934662	6.01231	12	0.93134	0.358325	0.445723	0.703614
FT209	FT209	418.091	286.06	cycloguanil;Albendazole;NCGC00160205-01!N-methyl-2,4-Dihydro		286.06	286.061	409.849	419.934	25	178;948;1687;2405;3179;3995;4961;5711;6697;7559;8399;9091;9797;10554;11262;12536;13320;14043;14740;15456;16263;17093;17850;18509;19284	79.9574;80.96507;106.9807;108.9964;123.6327;124.0071;136.007;137.9864;138.0226;166.0177;196.028;286.0598|75960.1420029431;36057.5554526177;1223.81444977832;1153.91762263798;1172.71324948444;318288.215130262;32327.1092379782;3079.09017378009;1431.53134185222;217825.399308909;3243.59295165744;15160.7757209078	1	-0.0473231	-0.000946379	-0.013825	-0.00890241	0.00706584	0.063727	5.92721	6	0.899225	5.8435	6	0.889258	5.67419	5	0.848283	5.78244	6	0.861573	#NUM!	0		5.8007	11	0.878184	5.81297	12	0.880399	5.88536	12	0.891473	5.72831	11	0.861573	0.358987	0.444922	0.703614
FT581	FT581	246.517	698.513	PE(16:1(9Z)/P-18:1(11Z));PE(16:1(9Z)/P-18:1(9Z));PE(18:2(9Z,		698.512	698.515	242.047	247.728	26	497;1239;1971;2730;3520;4424;5223;6117;7050;7945;8691;9369;10109;10836;11549;12137;12860;13628;14270;15004;15797;16583;17421;18088;18844;19558	196.0374;239.2384;253.2167;255.2325;279.2326;281.2479;307.264;418.2718;436.2827;460.2832;696.3591;698.5145|532.082951026302;430.996734223828;3535.89979344298;6569.30688251798;98221.8965584752;4190.72299573225;540.092072181289;4252.05794421318;11555.2634523701;586.985569399485;468.736269365877;164135.092616733	1	0.000973188	-0.0275632	-0.0186463	0.000194814	0.00509525	0.0275844	5.46352	6	0.736434	5.38836	6	0.705426	5.42237	6	0.746401	5.46228	6	0.740864	#NUM!	0		5.44295	12	0.745293	5.42532	12	0.727575	5.42594	12	0.724252	5.44233	12	0.740864	0.361501	0.441891	0.706949
FT589	FT589	246.811	702.536	PC(15:0/P-16:0);PE(16:0/P-18:0);PE(18:0/P-16:0)		702.534	702.538	244.359	249.209	20	503;2736;4430;5229;6123;7056;7951;8697;10115;11555;12866;13634;14275;15009;15803;16589;17427;18092;18850;19564		0	0.00561044	-0.0682531	-0.0240852	-0.0105548	0.0199103	0.0582585	4.78749	4	0.280177	4.61574	4	0.155039	4.88116	5	0.404208	4.91395	6	0.38206	#NUM!	0		4.83432	9	0.328904	4.76485	10	0.262458	4.70161	8	0.218162	4.89756	11	0.392027	0.363066	0.440014	0.706949
FT674	FT674	277.025	763.585	DG(20:3(5Z,8Z,11Z)/24:1(15Z)/0:0);DG(20:3(8Z,11Z,14Z)/24:1(1		763.568	763.593	274.636	279.847	18	573;1314;2042;2794;4527;6213;8026;8757;11623;12185;13700;14345;15082;15874;16674;17492;18916;19621		0	0.0116877	-0.0206178	0.00951975	-0.0372254	0.0301569	0.00255021	4.74755	4	0.251384	4.62287	2	0.16722	4.89249	5	0.409745	4.85181	5	0.321152	#NUM!	0		4.82002	9	0.314507	4.73734	7	0.234773	4.68521	6	0.20155	4.87215	10	0.358804	0.36334	0.439686	0.706949
FT809	FT809	287.95	858.524	PS(18:0/22:5(7Z,10Z,13Z,16Z,19Z));PE(DiMe(11,3)/MonoMe(11,5)		858.523	858.527	285.697	290.282	26	688;1412;2149;2895;3697;4662;5418;6360;7249;8141;8849;9527;10292;11002;11720;12266;13056;13812;14463;15186;15985;16797;17620;18253;19041;19713		0	-0.00356887	-0.00418957	0.0130777	0.00592184	0.00435455	0.0407836	5.89895	6	0.888151	5.96206	6	0.911406	5.93151	6	0.911406	6.00319	6	0.921373	#NUM!	0		5.91523	12	0.910299	5.98262	12	0.915836	5.93051	12	0.904762	5.96735	12	0.920266	0.364752	0.438002	0.706949
FT794	FT794	373.34	845.835			845.831	845.838	372.148	374.956	17	677;1402;2886;3685;4651;6347;7238;8132;9516;10281;10995;13043;13804;15973;16786;17607;19029		0	-0.0552863	0.0126323	0.0147956	-0.00473105	-0.0189951	-0.0462721	4.54365	4	0.108527	4.6797	5	0.207087	4.34755	2	0.0276855	4.49118	4	0.0996678	#NUM!	0		4.4456	6	0.0564784	4.58544	9	0.13289	4.61168	9	0.139535	4.41936	6	0.055371	0.365147	0.437532	0.706949
FT222	FT222	39.7565	297.156	Auraptene;C10-LAS (TENTATIVE);8-(4-hydroxyphenyl)-3-methoxy-	+	297.153	297.16	38.7637	41.6134	23	187;958;2418;3190;4008;4971;5725;7571;8410;9102;9808;11270;11955;12547;13330;14050;14748;15467;16274;17101;17858;18518;19294	79.95734;119.0499;133.0654;149.0091;155.9882;170.004;182.4559;183.0126;184.0196;195.012;196.0196;197.0275;198.035;211.0433;212.0508;225.0584;226.0669;233.1908;239.0744;240.0824;253.0899;254.0976;264.9842;267.1058;281.0158;296.2445;297.0454;297.1536;298.0247;298.1247;298.1559;325.1838|12840.0898792659;104528.603890099;4108.16542413191;1847.17334909073;9371.33908087778;35944.8027730206;6015.8099485…	1	0.01803	-0.00909398	-0.000587815	-0.142632	0.0540539	0.0257457	5.97953	5	0.915836	5.65383	4	0.82392	5.89681	6	0.904762	5.8075	6	0.873754	#NUM!	0		5.93817	11	0.916944	5.73066	10	0.853821	5.81668	9	0.879291	5.85216	12	0.889258	0.365497	0.437116	0.706949
FT676	FT676	54.9602	764.554	PC(16:0/P-18:1(11Z));PC(16:0/P-18:1(9Z));PC(16:1(9Z)/P-18:0)		764.553	764.557	53.4445	56.6805	26	576;1317;2045;2797;3590;4530;5305;6216;7136;8028;8760;9431;10185;10911;11626;12187;12943;13703;14348;15084;15876;16676;17494;18150;18918;19623	61.98851;227.2013;241.1191;255.2325;281.2479;303.2326;616.473;687.5451;690.5089;690.5589;764.5559|6507.12290569661;3618.45721898619;7231.73759195357;3291.93928862569;864.734277924512;2197.58418673533;804.727651667281;23753.873089311;13165.0892538539;2417.79370166939;78932.5777514395	1	0.00907509	0.00624575	-0.0137332	-0.0166381	0.0165853	0.00874757	5.1401	6	0.528239	5.08077	6	0.521595	5.1877	6	0.61794	5.04524	6	0.493909	#NUM!	0		5.1639	12	0.573643	5.06301	12	0.51495	5.11044	12	0.526024	5.11647	12	0.562569	0.366452	0.435983	0.70705
FT679	FT679	244.951	766.539	PE(18:0e/12-HEPE);PE(18:1e/11,12-EET);PE(18:1e/12-HETE)	+	766.538	766.541	240.699	247.654	26	579;1320;2048;2800;3594;4533;5309;6219;7138;8031;8762;9433;10188;10913;11630;12190;12946;13706;14351;15088;15880;16679;17497;18153;18921;19626	140.0114;196.0379;205.1954;227.2029;228.2032;253.2171;255.2329;256.2368;259.2428;277.2175;279.2324;281.2482;282.2514;283.264;285.2228;301.2173;302.2207;302.3065;303.2332;304.2358;305.2478;307.2643;329.2483;330.2514;331.2633;452.2776;462.2982;478.293;479.2965;480.3087;482.2675;500.2779;679.1629;691.5124;692.514;716.5248;723.1513;764.1764;765.5221;766.5415;767.5419|2492.63281674932;2858.13998151556…	1	0.011354	-0.0359562	-0.0207968	-0.00583525	0.00542726	0.0203935	6.13132	6	0.936877	6.04596	6	0.928018	6.23596	6	0.966777	6.15565	6	0.943522	#NUM!	0		6.18364	12	0.951274	6.10081	12	0.936877	6.08864	12	0.939092	6.1958	12	0.956811	0.367153	0.435153	0.70705
FT854	FT854	240.918	903.615	TG(14:1(9Z)/18:4(6Z,9Z,12Z,15Z)/22:6(4Z,7Z,10Z,13Z,16Z,19Z))		903.612	903.618	239.885	243.348	12	725;6398;8883;10330;11756;13093;14502;15217;16841;17661;18287;19747		0	0.0172667	-0.0253093	0.00835815	0.0194038	0.0647654	0.0410184	4.4276	1	0.0487265	4.52987	2	0.101883	4.65297	4	0.197121	4.67517	4	0.203765	#NUM!	0		4.54029	5	0.10299	4.60252	6	0.149502	4.47874	3	0.0653378	4.66407	8	0.199336	0.368944	0.43304	0.70895
FT160	FT160	228.657	244.065	Proflavine;4-(Methylnitrosamino)-1-(1-oxido-3-pyridinyl)-1-b		244.065	244.066	218.981	235.969	23	134;910;1642;2364;3137;3945;4926;5666;6644;7509;8364;9756;10509;11220;11911;12496;13277;14009;14699;15411;16212;17819;18466		0	-0.0124833	-0.0237353	0.000479031	-0.0311566	-0.080322	0.0141357	5.05926	6	0.472868	4.9468	5	0.423034	5.07993	6	0.545958	4.88841	4	0.359911	#NUM!	0		5.0696	12	0.521595	4.91761	9	0.376523	5.00303	11	0.448505	4.98417	10	0.465116	0.370409	0.431318	0.709302
FT766	FT766	250.533	819.594	DG(11D5/13D5/0:0);DG(13D5/11D5/0:0);DG(13M5/13M5/0:0)		819.592	819.595	247.073	255.329	26	647;1372;2114;2858;3659;4618;5383;6310;7211;8099;8813;9490;10250;10967;11683;12234;13014;13771;14421;15154;15947;16755;17572;18212;18998;19678		0	0.0129191	0.0170553	-0.00366364	0.00599964	0.0038053	0.00998519	5.77263	6	0.864895	5.71067	6	0.844961	5.75583	6	0.875969	5.7283	6	0.846069	#NUM!	0		5.76423	12	0.868217	5.71948	12	0.847176	5.74165	12	0.85825	5.74207	12	0.864895	0.37076	0.430907	0.709302
FT219	FT219	35.3876	294.181	N-Isobutyl-2,4,8,10,12-tetradecapentaenamide		294.177	294.182	33.7536	36.6567	18	185;955;1693;2414;3187;4005;4967;5719;7567;8408;9098;9806;10560;11952;15464;16271;17099;19292		0	0.00744963	0.0471526	-0.0489467	-0.0815555	0.0382488	-0.0939375	5.30549	6	0.637874	5.12166	5	0.552602	4.81072	1	0.321152	4.96953	4	0.436323	#NUM!	0		5.0581	7	0.509413	5.0456	9	0.504983	5.21358	11	0.598007	4.89013	5	0.387597	0.371855	0.429627	0.709302
FT232	FT232	509.445	304.06	2-{[hydroxy(2,3,4-trimethoxyphenyl)methylidene]amino}acetic		304.06	304.061	509.218	510.028	4	2427;4019;10570;13339		0	-0.0144094	0.00371204	-0.00970468	-0.025142	-0.0107094	-0.0122673	4.51583	2	0.0985604	4.40668	1	0.0487265	4.40245	1	0.0431894	4.35228	0	0.0420819	#NUM!	0		4.45914	3	0.0609081	4.37948	1	0.0398671	4.46126	3	0.0609081	4.37737	1	0.0376523	0.372343	0.429056	0.709302
FT100	FT100	85.0006	194.012			194.012	194.013	83.782	90.8014	23	87;866;1589;2314;3084;3887;4882;5614;6581;7453;8327;9008;9710;10461;11174;12449;13229;13966;14655;15362;16165;17782;18412	79.95714;80.96512;124.0068;194.0125|4211.85800455489;1049.51395887762;5374.55703275609;4320.40831160562	1	-0.0462893	0.0080213	-0.0280738	-0.0106649	-0.0692177	-0.0047528	5.11094	6	0.506091	5.19048	6	0.605759	4.84175	5	0.348837	4.84242	4	0.312292	#NUM!	0		4.97635	11	0.44186	5.01645	10	0.482835	5.15071	12	0.552602	4.84209	9	0.328904	0.375732	0.425122	0.714214
FT352	FT352	287.369	436.283	PE(P-16:0e/0:0);Phosphatidylethanolamine lyso alkenyl 16;3-h		436.282	436.284	285.145	289.136	26	293;1057;1785;2523;3297;4148;5062;5861;6830;7702;8512;9194;9915;10664;11378;12034;12661;13440;14136;14852;15589;16388;17221;17953;18634;19397	78.95899;122.001;140.0116;152.9951;196.0378;237.2225;239.238;375.2302;436.283|6478.45096688261;354.661303820594;7459.47203595425;915.118154492606;15381.4750016524;996.012603471377;16197.6553413829;4101.94279362707;95907.5673874653	1	-0.023953	0.000680979	0.0086078	0.0152462	0.0232704	0.0118851	5.72094	6	0.846069	5.77339	6	0.872647	5.61295	6	0.827243	5.79493	6	0.869324	#NUM!	0		5.66694	12	0.841639	5.78416	12	0.872647	5.74716	12	0.86268	5.70394	12	0.850498	0.377214	0.423412	0.715074
FT447	FT447	406.276	527.077	NCGC00380901-01_C23H24O10S_;NCGC00380901-01_C23H24O10S_;Prot		527.071	527.08	405.146	407.266	19	378;1135;3386;4267;5964;6916;7794;8588;9995;10741;11455;12746;13519;14910;15673;16475;17302;18722;19462	88.04032;141.0166;170.0429;199.07;252.0472;281.0728;281.1109;334.0484;363.0761;363.1102;445.0767|888.244140207058;537.168111330402;3316.27023082823;2130.07805034748;409.862697086919;397.3006906476;342.045312195867;323.369802284986;724.784208757072;86.6251707643414;310.212827094421	1	-0.0459106	-0.0409163	0.0195315	0.00615496	0.0169267	-0.0109833	4.75786	3	0.256921	4.90187	5	0.383167	4.87019	4	0.372093	4.93448	5	0.405316	#NUM!	0		4.81402	7	0.310078	4.91817	10	0.378738	4.82986	8	0.306755	4.90233	9	0.394241	0.377806	0.422732	0.715074
FT238	FT238	440.457	306.077	Glutathione (reduced);Glutathionate(1-);Glutathione	+	306.076	306.077	439.371	441.67	11	205;3205;6721;8426;9822;11286;12563;15485;16291;17116;17874	58.02985;74.02446;86.02415;87.05614;99.05589;112.0397;123.056;127.051;128.035;135.0561;137.0703;141.0662;143.0459;145.061;146.0451;153.0668;155.0809;160.0067;166.0981;167.0464;167.0821;177.0331;179.0455;181.0618;184.109;185.0565;192.0783;197.058;198.0868;210.0876;242.0784;254.0777;272.0887;288.0655;306.0771|349.720755793262;448.463652598186;97.0797004754644;208.935560386332;658.978160271787;84.65…	1	-0.0122208	-0.00545601	0.0283903	0.11016	0.026315	0.0785576	4.59536	1	0.140642	4.79898	3	0.287929	4.84806	2	0.358804	4.97147	4	0.437431	#NUM!	0		4.72171	3	0.232558	4.88522	7	0.352159	4.69717	4	0.212625	4.90976	6	0.398671	0.379796	0.42045	0.716411
FT510	FT510	405.946	581.059	[(3,4,5-trihydroxy-6-{1,2,6-trihydroxy-3-[hydroxy(3,4,5-trih		581.057	581.062	404.939	407.095	20	428;1178;2660;3437;4329;6022;6968;7856;8631;10042;10779;12112;12794;13563;14947;15723;16523;17348;18040;18770		0	-0.0517814	-0.0307121	0.0353988	-0.00479737	-0.0189994	-0.0441708	4.65179	4	0.181617	4.81218	5	0.295681	4.68423	4	0.224806	4.82749	5	0.300111	#NUM!	0		4.66801	8	0.192691	4.81983	10	0.301218	4.73198	9	0.24031	4.75586	9	0.258029	0.380136	0.420061	0.716411
FT547	FT547	400.017	633.036			633.034	633.037	397.803	401.163	26	465;1210;1942;2694;3479;4380;5199;6071;7018;7906;8662;9329;10076;10808;11525;12128;12825;13600;14251;14979;15763;16555;17387;18065;18814;19530	59.01442;140.59;141.0173;142.0198;222.3408;223.0204;304.0904;305.0239;306.0258;385.8388;387.0267;388.0274;467.5872;469.0301;551.0328;633.0362;715.0409|115580.378097325;8796.63798645441;2685646.08881166;794.400240784981;3241.23823775019;805329.187885989;6436.17643280707;1825979.01140614;1603.7552480409;4615.78865069478;1269591.56472893;1330.78671786682;2844.04420291204;813305.147968933;197578.1932…	1	0.00430503	0.0252524	-0.00435884	0.00649076	-0.0100737	-0.0187274	6.80562	6	0.997785	6.85951	6	0.99557	6.7944	6	0.996678	6.75437	6	0.994463	#NUM!	0		6.80001	12	0.997785	6.80694	12	0.994463	6.83256	12	0.997785	6.77438	12	0.99557	0.382667	0.417179	0.719642
FT163	FT163	435.137	253.05	5-L-Glutamyl-taurine;5,7-Dihydroxyflavone;3-hydroxy-2-(4-hyd	+	253.049	253.05	433.763	436.341	19	137;913;1646;3140;3949;5669;6648;7513;8368;9760;11223;12498;14703;15414;16218;17056;17821;18469;19249	79.9571;80.96511;106.9802;124.007;178.0178;179.0247;180.0326;191.0493;192.0335;195.0443;208.0282;209.0599;235.0388;253.0501|4629.58670285583;283.809751916912;634.328160891426;13204.1823834804;1400.27542257232;216.454324301911;385.743512173239;760.025039016956;280.371494380925;1376.36034781923;446.424003835652;393.261435392871;975.069949609535;2242.88217123107	1	-0.0288674	-0.0218199	0.0160357	0.0293869	0.0234676	0.0286067	4.77521	4	0.272425	4.91261	4	0.394241	4.77865	3	0.289037	4.95291	6	0.427464	#NUM!	0		4.77693	7	0.281285	4.93276	10	0.398671	4.84391	8	0.320044	4.86578	9	0.354374	0.383681	0.41603	0.720014
FT180	FT180	302.008	269.078	Pterocarpan base + 1O, 1MeO;(+)-cis-5,6-Dihydro-5-hydroxy-4-	+	269.078	269.079	300.805	303.692	19	156;929;1665;2383;3157;3969;4943;5689;6667;7531;9776;10530;11237;12515;13295;14719;16238;18484;19267	92.02514;108.0201;109.0232;135.0309;136.0335;137.0351;269.0781|578.360879020504;735.179640238866;176.680385686166;12187.2296573305;5014.49217837219;4805.35672580508;5351.31758075411	1	-0.0461819	-0.0269717	-0.0299645	0.00417749	-0.0405793	-0.0122986	4.86369	6	0.332226	4.74256	4	0.245847	4.68963	4	0.229236	4.57851	3	0.147287	#NUM!	0		4.77666	10	0.27907	4.66054	7	0.183832	4.80312	10	0.282392	4.63407	7	0.180509	0.38672	0.412603	0.724177
FT808	FT808	287.95	857.52	PI(16:0/20:4(5Z,8Z,11Z,14Z));PI(16:0/20:4(8Z,11Z,14Z,17Z));P		857.518	857.522	286.38	290.282	26	687;1411;2148;2894;3696;4661;5417;6359;7248;8140;8848;9526;10291;11001;11719;12265;13055;13811;14462;15185;15984;16796;17619;18252;19040;19712	78.95915;152.9955;205.1961;223.0012;241.0118;255.2331;259.0219;259.2421;277.2171;279.2329;281.2485;297.0377;303.2333;315.0485;375.231;391.2257;409.2346;413.2084;415.2243;417.2407;439.2247;553.2787;571.2897;575.2617;577.2781;579.2945;595.2882;597.3032;601.2798;619.2897;695.4644;813.56;854.8757;854.945;856.5148;857.5222;858.529;858.8339;859.0027;859.0414;859.1707;859.3406;859.5331;861.5449|532.1796…	1	-0.00405938	-0.00518072	0.0136292	0.00668732	0.00408206	0.0428246	6.20561	6	0.946844	6.26833	6	0.96124	6.2386	6	0.967885	6.31691	6	0.967885	#NUM!	0		6.2221	12	0.960133	6.29262	12	0.968992	6.23697	12	0.953488	6.27776	12	0.967885	0.38759	0.411627	0.724268
FT858	FT858	286.467	911.566	PI(18:0/22:5(4Z,7Z,10Z,13Z,16Z));PI(18:0/22:5(7Z,10Z,13Z,16Z		911.564	911.574	283.914	288.977	25	728;1452;2179;2934;3733;4714;5454;6406;7291;8185;8887;9574;10336;11760;12305;13095;13854;14508;15221;16020;16845;17665;18291;19079;19752	152.9954;223.0009;241.0114;281.2469;283.2643;297.0396;303.232;329.2489;419.2566;436.2875;445.2692;579.2956;581.3108;599.328;607.3215;627.2976;885.5546;908.7277;908.7645;911.5687;912.5755|85.3855235933821;90.5138326190638;834.906702268746;187.534811408696;827.919597198652;72.5452399551273;148.06017692066;502.3074620546;525.452512227747;93.1949082635242;126.12449461252;233.012857967287;763.67921505…	1	0.0318863	-0.00881132	0.00384787	-0.0190271	0.027331	0.00738584	5.12408	6	0.51495	5.02324	5	0.47619	5.26432	6	0.657807	5.2232	6	0.609081	#NUM!	0		5.1942	12	0.603544	5.12322	11	0.551495	5.07366	11	0.502769	5.24376	12	0.637874	0.388863	0.410203	0.72511
FT762	FT762	250.584	818.591	PS(18:0/20:0);PS(14:0/24:0);PS(16:0/22:0)		818.589	818.592	247.073	255.329	26	645;1370;2112;2856;3657;4616;5381;6308;7209;8097;8811;9488;10248;10965;11681;12232;13012;13769;14419;15152;15945;16753;17569;18210;18995;19676	59.01395;87.00843;168.043;224.0699;253.217;255.2328;256.2364;257.2386;279.2327;280.2362;281.2488;282.2516;283.2631;462.2992;480.3093;481.3112;482.3155;488.3129;506.3249;673.4829;716.5245;742.2584;742.5404;743.5441;744.5568;745.5597;759.519;766.5414;768.5556;816.061;818.5018;818.5919|1003.31931738574;1454.30099576576;1089.65611826572;1080.47648023389;2427.81827843493;50217.8554720379;3026.08554660…	1	0.0131556	0.016705	-0.00303267	0.00583917	0.00364031	0.00978867	6.0815	6	0.932447	6.02179	6	0.922481	6.0685	6	0.944629	6.03778	6	0.929125	#NUM!	0		6.075	12	0.936877	6.02978	12	0.923588	6.05164	12	0.930233	6.05314	12	0.936877	0.390711	0.408144	0.727019
FT591	FT591	404.571	704.084			704.082	704.086	403.655	405.619	18	505;1246;1978;3526;4432;6125;7059;7953;9376;10116;10842;12868;13636;15011;15805;16591;17428;18851	59.01396;88.04023;130.0618;141.0165;170.0428;194.0543;212.0652;223.0197;294.0679;305.0227;316.0502;376.0708;387.0258;398.0521;458.074;469.0288;480.0549;540.0778;622.0809;644.0638;704.0856|1760.56045132839;716.969040918945;8545.89363463039;59276.9339061217;2273.29672586588;512.47863271937;57415.95823918;19722.6784960137;15320.2562317844;42595.8285870102;710.391988767083;37960.0090837181;21823.2935…	1	-0.0573389	-0.0031637	0.0094662	0.0244843	-0.0305325	-0.0502486	5.23972	4	0.603544	5.37678	5	0.702104	5.14208	3	0.59247	5.22362	4	0.610188	#NUM!	0		5.1909	7	0.601329	5.3002	9	0.672204	5.30825	9	0.663344	5.18285	7	0.601329	0.392519	0.406139	0.727514
FT333	FT333	386.768	419.064	Propoxycarbazone;Thamnolic acid;3,4,5-trihydroxy-6-{[4-metho		419.063	419.065	385.188	388.166	23	279;1043;1768;2502;3279;4125;5051;5844;6811;7680;8499;9901;11362;12642;13424;14125;14838;15572;16371;17202;17941;18617;19381	84.99291;112.9878;145.0139;171.0101;231.0314;273.0414;288.0299;299.0221;303.0524;331.0485;359.0424;387.038;419.0637|6539.06224731562;17092.5830509567;54671.8412965917;2017.46873071788;6033.54224636341;788.268265705;1507.66853795478;1375.18645831567;792.47898881307;907.282853702415;36718.3458382693;1592.41699194097;100903.449568452	1	-0.0287028	-0.0510446	0.0111773	0.0126157	0.0394557	0.0699268	5.3461	6	0.66113	5.2023	4	0.613511	5.46483	5	0.771872	5.48996	6	0.750831	#NUM!	0		5.40546	11	0.726467	5.34613	10	0.684385	5.2742	10	0.635659	5.47739	11	0.758583	0.393574	0.404974	0.727514
FT515	FT515	322.77	598.308	Shearinine D_130028;Shearinine D_130028;NCGC00180336-03!16-b		598.306	598.309	320.945	324.82	19	433;1184;4340;5175;6030;6980;7866;8636;10046;11497;13570;14232;14954;15732;16527;17355;18044;18779;19507		0	-0.0166177	-0.0505698	0.0395458	-0.0141869	-0.00394321	0.0221661	4.83488	3	0.312292	4.96506	4	0.433001	4.91735	4	0.427464	5.11742	6	0.547065	#NUM!	0		4.87612	7	0.348837	5.04124	10	0.500554	4.89997	7	0.367663	5.01738	10	0.488372	0.393632	0.40491	0.727514
FT372	FT372	433.36	453.101	Apiosylglucosyl 4-hydroxybenzoate;Licoagroside B;Licoagrosid		453.1	453.102	431.909	435.007	21	309;1074;1800;2540;3316;4168;5077;5884;6851;7722;8531;9210;9932;10679;11396;12680;13457;14147;17237;17969;19415	78.95896;110.985;161.045;179.056;221.0664;453.1012;453.1703|19665.5851317548;36185.8057645847;3976.14739549338;2609.41211736457;4890.10366880023;12781.6219319693;5143.47275001152	1	-0.0208308	0.00579956	-0.03332	-0.0820998	-0.00431835	0.0873197	5.35168	6	0.668882	5.20279	6	0.614618	5.11349	4	0.570321	4.811	3	0.286822	#NUM!	0		5.23258	10	0.629014	5.00689	9	0.471761	5.27723	12	0.642303	4.96224	7	0.438538	0.39467	0.403765	0.727514
FT708	FT708	254.706	776.546	PS(15:0/20:0);PS(20:0/15:0);PC(16:1(9Z)/P-18:1(11Z))		776.544	776.547	251.825	257.478	15	597;2061;3607;4558;5330;7151;8046;8775;9447;10202;10923;13718;14371;15107;15895	227.201;239.2008;241.2166;253.2169;255.2323;267.2329;281.2481;480.3081;702.5092;702.5443;716.5247;717.4807;776.5477|682.681942357377;716.537955091367;672.043656321114;7249.62456969066;3883.03569799818;268.356044673862;518.133834075354;433.568719325058;10862.1694295568;2193.98024621525;16869.2706373505;281.867683893847;14658.559660919	1	-0.0282565	0.0230179	0.00253317	0.00541611	-0.0842697	0.020353	4.75004	4	0.253599	4.90852	6	0.388704	4.56134	3	0.139535	4.3694	1	0.0520487	#NUM!	0		4.65569	7	0.187154	4.63896	7	0.173865	4.82928	10	0.305648	4.46537	4	0.0819491	0.396012	0.402292	0.727514
FT823	FT823	66.0045	870.538	Phosphatidylserine 19;3-O-Sulfogalactosylceramide (d18:1/20:		870.535	870.54	64.9414	67.3416	14	2156;3707;4676;6372;7261;8153;10305;11016;13068;13826;15994;16813;17634;19056		0	-0.0581221	-0.0157868	-0.0250787	0.00134843	0.0185726	-0.0338066	4.70579	4	0.219269	4.55201	4	0.118494	4.45613	2	0.0719823	4.63069	4	0.181617	#NUM!	0		4.58096	6	0.135105	4.59135	8	0.140642	4.6289	8	0.157254	4.54341	6	0.121816	0.396716	0.40152	0.727514
FT172	FT172	473.101	259.023	STD_Frct6P;STD_Glucose-6-Phosphate;STD_Glucose-1-Phospate	+	259.022	259.024	471.357	473.973	26	147;922;1659;2376;3151;3961;4937;5678;6658;7523;8376;9065;9770;10522;11232;11924;12509;13288;14019;14712;15424;16230;17066;17830;18478;19258	78.95934;96.96969;138.98;168.9905;199.0015;259.0224|135278.076985738;117884.389729532;10861.4256477613;2140.03291765028;3939.27206994811;7825.19943577649	1	-0.029603	-0.0647973	0.0343576	-0.0172035	-0.0142897	0.00812366	5.75007	6	0.854928	5.89811	6	0.898117	5.8271	6	0.893688	6.00431	6	0.922481	#NUM!	0		5.78859	12	0.872647	5.95121	12	0.912514	5.82409	12	0.881506	5.91571	12	0.902547	0.398454	0.399622	0.727514
FT601	FT601	400.017	717.043			717.04	717.045	397.803	401.163	26	515;1255;1988;2745;3537;4445;5240;6136;7070;7962;8705;9388;10127;10853;11566;12146;12879;13642;14286;15018;15816;16602;17437;18099;18858;19572		0	0.00386628	0.0248612	-0.00450414	0.00564038	-0.00931516	-0.0187414	5.4612	6	0.733112	5.51288	6	0.767442	5.44922	6	0.763012	5.40964	6	0.722038	#NUM!	0		5.45521	12	0.758583	5.46126	12	0.748616	5.48704	12	0.753045	5.42943	12	0.735327	0.399495	0.398489	0.727514
FT033	FT033	403.184	127.001	Glyceric acid;L-Glyceric acid;D-2,3-Dihydroxypropanoic acid		127.001	127.001	400.601	406.049	21	28;811;1517;2256;3017;3817;4820;5549;6516;7381;8948;10403;11109;11826;12385;13177;13912;14599;15294;16103;17730		0	0.0103633	0.00886152	-0.0196787	-0.0189435	-0.0419817	-0.01152	4.9196	6	0.37763	4.82422	4	0.297896	5.00869	6	0.492802	4.71706	3	0.223699	#NUM!	0		4.96415	12	0.431894	4.77064	7	0.267996	4.87191	10	0.342193	4.86287	9	0.349945	0.399588	0.398388	0.727514
FT642	FT642	405.215	745.066	NCGC00384909-01!;NCGC00384909-01!;(1S,11R,14R)-14-(hydroxyme		745.059	745.069	403.655	406.329	13	1288;4492;6182;7107;7998;10884;11599;12918;13673;15055;15851;17468;18891		0	-0.034478	-0.0358472	0.0250105	-0.0059145	-0.0266725	-0.0166015	4.60316	2	0.148394	4.72838	3	0.239203	4.76508	4	0.276855	4.69484	3	0.208195	#NUM!	0		4.68412	6	0.202658	4.71161	6	0.219269	4.66577	5	0.186047	4.72996	7	0.24031	0.399606	0.398368	0.727514
FT681	FT681	244.951	767.543	PA(14:0/24:0);PA(16:0/22:0);PA(18:0/20:0)		767.541	767.544	240.699	247.654	26	580;1321;2049;2801;3595;4534;5310;6221;7139;8032;8763;9435;10189;10914;11631;12192;12947;13707;14353;15089;15881;16680;17499;18154;18922;19628		0	0.0131551	-0.0359887	-0.0205323	-0.0067066	0.00505146	0.0192929	5.78597	6	0.868217	5.7041	6	0.843854	5.90097	6	0.905869	5.81076	6	0.874862	#NUM!	0		5.84347	12	0.888151	5.75743	12	0.861573	5.74503	12	0.860465	5.85586	12	0.891473	0.40005	0.397885	0.727514
FT898	FT898	410.622	1420.8			1420.79	1420.8	409.694	411.742	13	775;1482;2217;2980;3772;5505;7342;9620;11071;12349;13140;14556;16899	126.9045;1069.679;1164.974;1175.85;1186.71;1250.856;1251.863;1261.738;1292.889;1292.987;1293.891;1303.756;1303.824;1304.771;1360.776;1360.828;1378.791;1379.814;1416.397;1420.8;1420.913;1421.808|16250.3582480851;316.63347001504;80.4539771257623;467.651263753123;1384.04235797414;113.141071161681;110.207288754782;714.683616119555;7155.81524406898;99.8948574800579;311.902241444477;6523.42781626492;10…	1	0.040196	0.0757807	-0.10117	0.0697362	-0.0608074	-0.0471383	5.50384	4	0.757475	5.2639	3	0.640089	5.40068	3	0.732004	5.01329	1	0.477298	#NUM!	0		5.45226	7	0.75526	5.13859	4	0.562569	5.38387	7	0.705426	5.20698	4	0.616833	0.402023	0.395749	0.728458
FT554	FT554	373.162	647.885			647.879	647.888	372.148	373.561	14	472;1217;2701;4390;5207;7025;7913;9337;10084;11531;14257;15772;16563;18822		0	-0.0312976	-0.00517606	0.0109985	-0.0027456	-0.0534311	-0.00287076	4.96914	3	0.41639	5.12902	4	0.555925	4.82757	2	0.335548	4.98343	3	0.447398	#NUM!	0		4.89836	5	0.370986	5.05622	7	0.51052	5.04908	7	0.488372	4.9055	5	0.397564	0.402643	0.395079	0.728458
FT419	FT419	68.224	505.227	Aluminum dimerumic acid [M+Al-2H];Dimerum acid [M-H2+Fe];2-(		505.226	505.228	64.688	69.0801	16	355;1112;1843;2585;3359;4233;5935;7767;9245;10716;11437;12073;12722;13498;14894;16451	198.1135;241.1191;277.2177;306.106;505.2274|1144.53180382522;11071.2445132162;302.757461663944;504.829704307406;7243.94841757039	1	-0.0133572	0.0330822	-0.034456	-0.00736339	-0.0367861	-0.04514	4.77467	5	0.27021	4.61234	3	0.148394	4.82894	5	0.33887	4.39265	1	0.0586932	#NUM!	0		4.8018	10	0.303433	4.50249	4	0.0941307	4.6935	8	0.208195	4.61079	6	0.16722	0.403047	0.394644	0.728458
FT526	FT526	456.255	608.08			608.078	608.081	455.257	458.262	22	444;1195;2676;3456;4355;5185;6048;6994;7878;8646;9319;10056;10792;11507;12807;13581;15743;16537;17367;18053;18792;19517		0	-0.0630532	0.00912473	0.0212117	-0.00874132	0.00923225	0.00801786	5.47856	5	0.746401	5.60495	6	0.805094	5.24032	3	0.645626	5.5008	6	0.754153	#NUM!	0		5.35944	8	0.698782	5.55287	12	0.779623	5.54175	11	0.776301	5.37056	9	0.713178	0.405855	0.39163	0.732032
FT599	FT599	400.019	716.043			716.041	716.045	399.277	401.163	25	513;1253;1986;2743;3535;4443;5238;6134;7068;7960;8703;9386;10125;10851;11564;12877;13640;14284;15016;15814;16600;17435;18097;18856;19570		0	-0.0462462	0.0120993	-0.0148258	0.0339329	0.0105033	0.0442438	6.02776	6	0.925803	6.07923	6	0.936877	5.78611	5	0.888151	5.97443	6	0.913621	#NUM!	0		5.90694	11	0.903654	6.02683	12	0.922481	6.05349	12	0.93134	5.88027	11	0.89701	0.411104	0.386048	0.739988
FT177	FT177	35.5791	266.151	Dezocine;Lysyl-Valine;Valyl-Lysine		266.151	266.152	34.5385	36.9701	24	152;926;1662;2379;3154;3966;4940;5683;6664;7528;8379;9071;9773;10526;11928;12512;13291;14022;14715;15429;16234;17071;17832;19263		0	0.0224619	0.0483463	-0.0414563	-0.0688261	0.0301194	-0.085735	5.57134	6	0.775194	5.39894	6	0.715393	5.23352	5	0.638981	5.32966	5	0.677741	#NUM!	0		5.40243	11	0.72536	5.3643	11	0.700997	5.48514	12	0.751938	5.28159	10	0.660022	0.413621	0.383397	0.740945
FT551	FT551	400.454	636.045	O-acetyl-ADP-ribose		636.04	636.048	399.415	404.687	17	469;1214;2698;4385;5204;6075;7910;9333;10081;10812;12830;13604;14255;15769;16560;18818;19534		0	-0.0216711	-0.000667353	-0.0168641	-0.00085643	-0.022296	-0.0349135	4.49943	4	0.0874862	4.62348	4	0.168328	4.51409	3	0.108527	4.5275	4	0.116279	#NUM!	0		4.50676	7	0.0830565	4.57549	8	0.126246	4.56146	8	0.106312	4.5208	7	0.106312	0.413868	0.383138	0.740945
FT442	FT442	68.1491	521.201	Isolariciresinol 9-O-beta-D-glucoside;Icariside E5;(7'R,8'R)		521.2	521.202	64.688	69.0801	13	373;1130;1860;2605;3380;4260;7788;10735;11450;12078;12741;13514;16470	198.1133;241.1193;521.2002|350.538022546682;4692.25207669885;1043.60008613119	1	-0.0152967	0.0391431	-0.0236679	0.00184659	-0.0447684	-0.0288462	4.55732	4	0.117386	4.40615	2	0.047619	4.53616	4	0.121816	4.25869	1	0.0188261	#NUM!	0		4.54674	8	0.108527	4.33242	3	0.0276855	4.48174	6	0.06866	4.39742	5	0.0409745	0.414249	0.382739	0.740945
FT850	FT850	290.336	901.546	PI(18:0/14,15-EET);PI(18:0/8,9-EET);PI(18:0/12-HETE)	+	901.544	901.551	287.63	292.352	19	722;2928;3729;4709;5447;6395;7285;8178;9564;10327;11034;12299;13091;13850;14499;16014;16838;17658;19074	319.2282;901.5488;901.6362|75.2060772847813;8660.74793330238;60.6677646033404	1	-0.00530588	0.0114839	-0.00991855	-0.00963089	-0.0419925	-0.073656	4.50853	5	0.0952381	4.63214	5	0.173865	4.54661	4	0.13289	4.35655	4	0.0442968	#NUM!	0		4.52757	9	0.0985604	4.49434	9	0.089701	4.57033	10	0.112957	4.45158	8	0.0708749	0.41526	0.38168	0.740945
FT812	FT812	288.767	861.55	PI(16:0/20:2(11Z,14Z));PI(18:0/18:2(9Z,12Z));PI(18:1(11Z)/18		861.548	861.552	286.69	290.282	26	691;1415;2152;2898;3700;4665;5421;6363;7252;8144;8852;9530;10295;11005;11723;12269;13059;13815;14466;15189;15988;16800;17623;18256;19044;19716	152.9957;223.0013;241.0114;242.0152;255.2321;259.0221;279.2326;280.2362;281.2485;282.2516;283.2642;297.0375;305.2482;307.2617;315.0478;391.2258;415.226;417.2408;418.2439;419.2559;435.2509;437.266;553.2775;555.2817;577.2774;578.2796;579.2944;580.2981;581.3095;597.3059;599.3215;858.893;858.9467;859.5364;860.5391;861.5524;862.5566;863.5662|3426.27123917094;3996.77661855084;18844.3159570781;442.65917…	1	0.00623579	-0.00726368	0.0179261	0.000699254	0.0391964	0.0125831	5.91189	6	0.895903	6.00679	6	0.920266	5.94844	6	0.916944	6.10371	6	0.934662	#NUM!	0		5.93017	12	0.913621	6.05525	12	0.930233	5.95934	12	0.915836	6.02608	12	0.934662	0.415836	0.381077	0.740945
FT632	FT632	518.62	740.188	Malvidin 3-(6-malonylglucoside) 5-glucoside;[(6-{[5,7-dihydr		740.187	740.19	517.281	520.026	14	542;1281;2768;3560;4480;5269;7099;7989;8729;9407;11592;13667;14312;15843	128.0349;143.0458;160.0063;175.0179;179.0461;185.0559;197.0564;210.0883;239.0677;254.078;272.0885;286.0501;288.0664;304.0607;306.0766;314.099;332.0918;338.0493;339.131;365.1091;383.1207;397.0803;399.0979;401.1308;415.092;417.1081;433.1032;435.119;449.0817;467.0906;482.1015;593.136;611.1454;704.1678;722.1774;737.9043;740.1898|9248.80668619818;2727.25087883446;878.615559202028;925.588420063576;1654…	1	-0.0222875	0.0177466	-0.00351232	-0.0411212	-0.0510728	0.0499419	5.15099	4	0.542636	5.02631	4	0.48062	4.98688	3	0.48062	4.8424	1	0.311185	#NUM!	0		5.06894	7	0.51938	4.93435	5	0.399779	5.08865	8	0.516058	4.91464	4	0.406423	0.422116	0.374568	0.750618
FT029	FT029	236.942	124.991	2-Hydroxyethanesulfonate;Ethyl hydrogen sulfate		124.991	124.991	229.874	240.427	26	25;808;1514;2253;3014;3814;4816;5547;6511;7377;8273;8946;9656;10401;11107;11824;12381;13174;13909;14597;15290;16099;16942;17728;18351;19148	79.95733;81.9529;94.98067;124.9912|11344.5227355792;1434.72959249822;1167.15129813335;2046.35176442144	1	-0.00621377	-0.0119176	0.00173302	0.00578879	-0.0317646	0.0105377	5.0119	6	0.447398	4.93735	6	0.41639	5.0349	6	0.506091	5.03993	6	0.490587	#NUM!	0		5.0234	12	0.475083	4.98864	12	0.460687	4.97462	12	0.426357	5.03742	12	0.504983	0.423095	0.373562	0.750844
FT482	FT482	266.101	557.287	4-({5-[5-hydroxy-3-({[(2Z)-2-methylbut-2-enoyl]oxy}methyl)pe		557.287	557.289	264.877	270.693	11	406;1889;3412;4303;5153;7827;9285;10023;12770;15700;16503	152.9955;227.0333;285.2571;329.2484;465.2424;557.2883|1053.43666812324;324.725595619867;506.176416410344;6696.36356167748;143.448864573429;14304.0109620628	1	-0.0376064	0.0209068	-0.0466415	0.0282611	-0.012292	0.00664228	5.08287	4	0.488372	4.94039	3	0.418605	4.79747	1	0.310078	4.9205	2	0.393134	#NUM!	0		4.94017	5	0.404208	4.93044	5	0.393134	5.01163	7	0.457364	4.85899	3	0.345515	0.425022	0.371588	0.751774
FT231	FT231	482.975	304.057	2-{[hydroxy(2,3,4-trimethoxyphenyl)methylidene]amino}acetic		304.056	304.06	481.571	483.975	22	197;965;1703;2426;3198;4020;4980;5736;6715;7581;8420;9112;9815;10571;11280;12557;13338;14759;15477;16285;17110;18527		0	-0.0452283	0.000538675	-0.00898057	0.00412805	-0.0180737	0.00429756	4.79315	6	0.285714	4.74834	6	0.248062	4.59832	4	0.166113	4.62153	4	0.174972	#NUM!	0		4.69573	10	0.211517	4.68493	10	0.20598	4.77074	12	0.260244	4.60992	8	0.163898	0.425904	0.370689	0.751774
FT559	FT559	441.833	649.071	7,8,8,12,13,22-hexahydroxy-19-(hydroxymethyl)-3,6,16-trioxo-		649.07	649.076	441.792	442.512	3	2705;3489;7918		0	-0.0135919	0.0172656	-0.000374079	-0.0115925	-0.000324448	0.00829546	4.73349	2	0.242525	4.65315	1	0.186047	4.60298	0	0.169435	4.60298	0	0.160576	#NUM!	0		4.66823	2	0.193798	4.62806	1	0.161683	4.69332	3	0.20598	4.60298	0	0.159468	0.426705	0.369872	0.751774
FT837	FT837	247.073	890.579	PS(18:2(9Z,12Z)/24:1(15Z));PS(18:3(6Z,9Z,12Z)/24:0);PS(18:3(		890.577	890.581	245.979	248.336	21	713;1441;2168;2919;4699;6387;7277;8169;8872;10318;11026;11746;13081;13842;14490;15207;16829;17649;18277;19067;19737	135.0307;740.5258;816.5574;890.5808;890.65|15028.5282029926;2708.761945847;1439.75144990226;19899.5261363672;453.48409503971	1	-0.0224918	-0.0320683	0.00876094	0.00780101	0.0139382	-0.00451289	5.17689	4	0.560354	5.28691	5	0.654485	5.22036	5	0.633444	5.24928	5	0.630122	#NUM!	0		5.19863	9	0.605759	5.2681	10	0.654485	5.2319	9	0.612403	5.23482	10	0.632337	0.427028	0.369543	0.751774
FT596	FT596	400.017	715.039	[2,6-dihydroxy-4-({[5-hydroxy-2-(hydroxymethyl)-4,6-bis(3,4,		715.037	715.041	397.803	401.163	26	510;1251;1983;2740;3532;4440;5236;6132;7066;7957;8701;9383;10122;10848;11562;12143;12874;13638;14282;15014;15812;16598;17432;18095;18854;19567	59.01424;140.5902;141.0172;142.02;222.3404;223.0204;224.0228;304.0904;305.0239;306.0247;385.8389;387.0268;388.028;467.5883;469.0299;470.03;549.3379;551.0331;552.0348;631.0873;633.0368;634.0386;715.0404;716.0431;797.0429;879.0486;961.0534|46463.874423513;6456.24152210217;1969599.25087238;1201.13531475532;3545.955756374;889354.989487614;693.011923742711;6026.71568358583;1778940.56516989;2784.475527…	1	0.00419822	0.0265479	-0.00559811	0.006855	-0.010762	-0.0203492	6.74145	6	0.994463	6.79209	6	0.994463	6.72341	6	0.992248	6.6841	6	0.990033	#NUM!	0		6.73243	12	0.994463	6.73809	12	0.991141	6.76677	12	0.994463	6.70376	12	0.991141	0.427979	0.368578	0.751947
FT644	FT644	249.775	745.558	PA(15:0/24:0);PA(19:0/20:0);PA(20:0/19:0)		745.556	745.559	247.897	253.974	23	551;1290;2776;4495;6184;7108;8000;8735;9414;10159;10887;11601;12169;12920;13675;14320;15058;15852;16645;17470;18129;18893;19603		0	0.0218521	-0.040299	0.0153973	-0.0210415	0.0389117	-0.0192863	4.97361	3	0.421927	5.10459	6	0.538206	5.3229	6	0.696567	5.23259	6	0.620155	#NUM!	0		5.14825	9	0.565891	5.16859	12	0.58361	5.0391	9	0.48062	5.27774	12	0.657807	0.430796	0.365729	0.755391
FT683	FT683	246.652	768.551	PC(15:0/18:0);PC(18:0/15:0);PE(14:0/22:0)		768.549	768.552	241.987	249.655	25	582;1322;2050;2803;3596;4536;5312;6223;7140;8033;8764;10191;10915;11633;12194;12949;13708;14355;15091;15882;16682;17503;18156;18923;19630		0	0.0170201	-0.0640544	-0.0213241	-0.0266234	-0.000844579	0.0241284	5.46548	6	0.738649	5.31008	5	0.671096	5.64817	6	0.840532	5.55547	6	0.774086	#NUM!	0		5.55682	12	0.792913	5.43278	11	0.735327	5.38778	11	0.709856	5.60182	12	0.817276	0.433952	0.362559	0.759415
FT046	FT046	496.94	140.012	O-Phosphoethanolamine;STD_L-Serine;1,2-Diacylglycerol-LD-PI-	+	140.011	140.012	494.231	500.701	25	39;821;1530;2266;3032;3832;4834;5560;6528;7397;8286;8963;9670;10416;11123;12397;13187;13923;14611;15304;16116;16960;17742;18366;19161	62.96424;78.95938|7608.13108791931;257999.929850922	1	-0.0559892	-0.0164435	-0.000610557	0.00304142	-0.00385072	0.00923928	5.57217	6	0.777409	5.48312	6	0.749723	5.33829	5	0.700997	5.5525	6	0.771872	#NUM!	0		5.45523	11	0.75969	5.51781	12	0.767442	5.52764	12	0.771872	5.4454	11	0.743079	0.435718	0.360794	0.760876
FT768	FT768	252.003	820.59	PE(18:4(6Z,9Z,12Z,15Z)/24:1(15Z));PE(20:0/22:5(4Z,7Z,10Z,13Z		820.584	820.594	248.846	255.329	26	649;1374;2116;2860;3661;4620;5385;6312;7213;8101;8815;9492;10252;10969;11685;12236;13016;13773;14423;15156;15949;16757;17574;18214;19000;19680	87.0082;115.0408;255.2322;256.2357;281.2469;282.2516;283.2597;690.5062;718.5412;743.5557;745.5605;746.5656;802.4968;820.5057;820.5743|215.552692404253;88.0365088894145;340.49000975905;32.3415749417677;132.710353841856;100.416991974726;55.2565037951354;99.5470035561311;367.074150991743;55.0928790108173;75.8554278199881;1364.58661035376;42.9260663682726;147.899458759048;3190.42493437598	1	0.016348	0.0150683	-0.00614327	0.00591576	0.00744413	0.0115891	5.44941	6	0.72536	5.39285	6	0.707641	5.45493	6	0.766334	5.40463	6	0.72093	#NUM!	0		5.45217	12	0.754153	5.39874	12	0.719823	5.42113	12	0.722038	5.42978	12	0.736434	0.436992	0.359526	0.760876
FT428	FT428	400.91	509.02	m-Trigallic acid;Flufenoxuron		509.019	509.023	399.802	401.946	16	361;1118;1847;2591;5115;8573;9250;9977;10721;11441;12074;12729;14182;16458;17996;19447		0	0.0360499	0.0346324	-0.00896281	0.0177811	0.00400619	-0.000418313	4.37233	3	0.0321152	4.47886	4	0.0719823	4.46569	4	0.0786268	4.37035	3	0.0531561	#NUM!	0		4.41901	7	0.0454042	4.42461	7	0.0542636	4.4256	7	0.0465116	4.41802	7	0.0542636	0.437374	0.359147	0.760876
FT675	FT675	247.051	764.534	PC(15:0/P-18:1(11Z));PC(15:0/P-18:1(9Z));PE(18:0/P-18:1(11Z)	+	764.525	764.545	239.539	261.082	28	575;1316;2043;2044;2796;3589;4529;5303;5304;6215;7134;7135;8027;8759;10184;10910;11625;12186;12942;13702;14347;15083;15875;16675;17493;18149;18917;19622	59.01383;140.0116;168.0426;196.0377;205.1961;224.0682;227.2014;253.2166;255.2327;257.2274;259.2429;279.2323;281.2485;283.2641;285.2587;301.217;302.2209;303.2331;304.2366;305.2478;329.2487;331.2637;345.2435;434.2669;452.278;460.2829;462.299;478.2933;480.3091;482.2677;500.2776;688.3809;690.5093;705.4714;714.5094;762.1653;764.5275;764.5455;765.5265;766.5398|1005.15017636257;1827.80483208749;767.2703…	1	-0.0223188	-0.0552395	-0.015323	-0.0122505	0.00046741	0.0445761	6.21948	6	0.950166	6.02448	5	0.923588	6.2699	6	0.968992	6.28188	6	0.96567	#NUM!	0		6.24469	12	0.964563	6.15318	11	0.943522	6.12198	11	0.941307	6.27589	12	0.966777	0.438696	0.357837	0.761672
FT486	FT486	266.095	559.303			559.302	559.304	264.774	269.457	9	410;1894;3415;5155;7830;9290;12773;15703;16505	152.9955;227.0308;287.2726;329.2475;330.2485;331.2632;391.1379;467.2581;509.3429;559.3034|500.599463924588;108.453209564921;52.7936345490843;44.2987507876524;55.0750496225305;3673.08805058643;33.2986548729195;85.5276821104098;81.6966316241974;6284.68725597245	1	-0.0165469	0.0251399	-0.0302807	0.0268473	-0.0116768	0.00911171	5.0348	3	0.461794	4.92753	2	0.404208	4.86165	1	0.365449	4.96063	2	0.430786	#NUM!	0		4.94822	4	0.414175	4.94408	4	0.409745	4.98116	5	0.433001	4.91114	3	0.399779	0.441746	0.354828	0.765461
FT677	FT677	247.077	765.537	PA(15:0/24:1(15Z));PA(24:1(15Z)/15:0);1-O-beta-D-Glucopyrano		765.528	765.548	240.804	261.082	26	577;1318;2046;2798;3591;4532;5306;5307;6217;7137;8029;8761;10186;10912;11628;12188;12944;13704;14349;15085;15877;16677;17495;18151;18919;19624		0	-0.018727	-0.0474628	-0.0141568	-0.0111085	0.00557108	0.0369987	5.88692	6	0.885936	5.73522	5	0.854928	5.94476	6	0.913621	5.96075	6	0.908084	#NUM!	0		5.91584	12	0.911406	5.84799	11	0.889258	5.81107	11	0.877076	5.95276	12	0.916944	0.444098	0.352522	0.767027
FT271	FT271	464.651	333.059	1-(sn-Glycero-3-phospho)-1D-myo-inositol;6-(4-ethenyl-2-hydr		333.058	333.06	463.407	465.879	17	234;997;2456;3230;4055;6752;7616;8453;9854;11311;13373;15514;16322;17146;17899;18561;19334	78.9592;96.96953;150.9804;152.9959;171.0061;223.0013;241.012;259.0225;333.0599|21836.9072725946;4287.12090928719;560.650801723733;49463.5550933388;6073.06826166747;820.286854686459;44056.4925290726;2599.33676566595;85526.8289017358	1	-0.0456733	-0.00741965	0.0705338	-0.000131727	0.000294364	0.0287293	5.15153	3	0.543743	5.29813	4	0.660022	5.05907	2	0.52381	5.47181	6	0.745293	#NUM!	0		5.1053	5	0.537099	5.38497	10	0.710963	5.22483	7	0.606866	5.26544	8	0.65227	0.444462	0.352166	0.767027
FT721	FT721	290.723	788.545	2-amino-3-[hydroxy-[3-octadecanoyloxy-2-[octadec-11-enoyl]ox	+	788.543	788.547	288.275	292.911	26	611;1342;2076;2825;3619;4575;5347;6263;7165;8058;8785;9461;10216;10936;11653;12210;12976;13734;14385;15119;15909;16716;17530;18174;18954;19649	78.95893;152.9956;281.2481;282.2515;283.2643;284.2675;417.2406;418.2445;419.2569;420.2598;421.2643;435.2524;437.2669;438.271;699.3553;699.4974;700.5032;701.5138;702.5159;744.5287;786.11;788.5463;789.5504|1746.33416899599;16713.2901110269;29935.2054026335;1482.33280840828;74168.3031398159;1787.6940935673;15264.2196361522;878.042108320241;69454.1380566208;1725.07956802608;554.353975004108;3089.7915…	1	0.0039668	-0.0120965	-0.0151612	0.000841363	-0.00375014	-0.0173881	5.93649	6	0.90144	5.87747	6	0.893688	5.946	6	0.914729	5.93039	6	0.902547	#NUM!	0		5.94124	12	0.918051	5.90393	12	0.899225	5.90698	12	0.89701	5.9382	12	0.911406	0.445258	0.351388	0.767027
FT038	FT038	351.78	131.09	2-Heptanethiol;Heptane-1-thiol		131.09	131.091	350.096	353.681	20	32;814;1521;2259;3022;3821;4826;5554;6520;7385;8954;11113;12388;13181;14604;15297;16107;16949;18358;19155		0	-0.0449956	-0.0146977	-0.00116987	0.0360963	0.00032987	0.0084095	4.71177	6	0.224806	4.58728	3	0.13732	4.65714	4	0.20155	4.77758	5	0.260244	#NUM!	0		4.68446	10	0.203765	4.68243	8	0.203765	4.64953	9	0.172757	4.71736	9	0.233666	0.447059	0.349635	0.767565
FT814	FT814	288.767	862.554	PS(18:1(11Z)/22:2(13Z,16Z));PS(18:1(9Z)/22:2(13Z,16Z));PS(18		862.552	862.556	286.69	290.282	26	692;1416;2153;2899;3701;4666;5422;6364;7254;8145;8853;9531;10296;11006;11724;12270;13060;13816;14467;15190;15989;16801;17624;18257;19045;19717		0	0.00744594	-0.00686749	0.0168704	-6.02304e-05	0.0384788	0.0101076	5.583	6	0.782946	5.67092	6	0.82835	5.62093	6	0.830565	5.77003	6	0.857143	#NUM!	0		5.60196	12	0.813953	5.72048	12	0.848283	5.62696	12	0.815061	5.69548	12	0.846069	0.447311	0.34939	0.767565
FT176	FT176	35.6125	265.148	Dodecyl sulfate;zinniol;STROBILACTONE A	+	265.148	265.15	34.5385	36.9701	26	151;925;1661;2378;3153;3965;4939;5682;6663;7527;8378;9069;9772;10525;11234;11927;12511;13290;14021;14714;15428;16233;17070;17831;18481;19262	79.95766;95.95201;96.66875;96.96051;97.51513;97.57298;109.9679;165.0224;179.0385;264.3379;265.1488;265.6163;265.6742;265.7168;265.7509;265.8562;265.9657;266.0129;266.0659;266.0963;266.1598;266.2528|69307.5466404956;16142.2040898789;3343.10673780919;1159052.32695015;829.728148007763;829.627831362053;380.194431301982;1169.85119580214;477.231496019807;7111.70627494146;2588083.90205873;510.1613142125…	1	0.0250303	0.0505337	-0.0459764	-0.0669938	0.0348606	-0.0924757	6.46433	6	0.973422	6.299	6	0.96567	6.11254	6	0.947951	6.23362	6	0.954596	#NUM!	0		6.28844	12	0.967885	6.26631	12	0.96567	6.38167	12	0.972315	6.17308	12	0.952381	0.454013	0.342931	0.77624
FT110	FT110	72.7431	205.035	2-Methylcitric acid;Homocitric acid;Methylisocitric acid		205.035	205.036	68.096	73.5135	14	2323;3095;3899;5625;6595;7469;8331;12460;14662;15372;16174;17016;18421;19211	59.0139;71.01379;87.00877;115.0026;124.9876;205.1597|978.475261557539;493.698613205515;443.99973479482;410.166998743559;162.82123701895;150.72583547697	1	-0.0334239	-0.024287	0.00325809	-0.00557502	0.0655411	-0.00638493	4.6649	4	0.184939	4.55056	3	0.116279	4.51694	2	0.111849	4.72375	5	0.230343	#NUM!	0		4.59092	6	0.143965	4.63716	8	0.170543	4.60773	7	0.136213	4.62035	7	0.172757	0.454127	0.342823	0.77624
FT311	FT311	232.491	373.124	N-[(5-Hydroxy-2-pyridinyl)methyl]adenosine;Coriandrone D;NCG		373.124	373.125	225.661	237.198	17	261;1751;2484;3259;4095;5033;5818;6786;7656;9885;11340;12006;12624;14109;14820;15549;16352	129.0552;243.0621|17755.9426584707;417.366010351998	1	0.00319435	-0.0184838	-0.0343469	-0.00016361	-0.0302064	0.0184851	4.8284	6	0.30454	4.72542	3	0.23588	4.92847	5	0.436323	4.59291	2	0.152824	#NUM!	0		4.87844	11	0.353267	4.65916	5	0.182724	4.77691	9	0.263566	4.76069	7	0.259136	0.455076	0.341916	0.776357
FT053	FT053	358.746	145.014	STD_Ketoglutarat;3-Oxoglutaric acid;Di-2-propenyl disulfide,		145.014	145.014	357.064	360.63	12	45;827;1537;2272;3039;3837;6535;7403;12404;15310;16122;18371	71.01412;87.00831|121.902633639836;369.988726815282	1	-0.0431017	0.00835279	-0.00234557	0.01755	-0.0390954	-0.0119333	4.6784	4	0.192691	4.56338	2	0.126246	4.45712	1	0.0730897	4.6081	3	0.162791	#NUM!	0		4.56776	5	0.119601	4.58574	5	0.136213	4.62089	6	0.148394	4.53261	4	0.114064	0.457713	0.339407	0.77935
FT153	FT153	323.335	242.078	STD_M088REF_Cytidine;Cytarabine;Cytarabine	+	242.077	242.079	322.297	324.241	22	132;907;3942;4923;5663;6638;7507;9048;9752;10505;11217;11909;12493;13274;14007;14697;15408;16210;17052;17815;18460;19244	81.04571;109.0404|472.661271578216;1302.42290356941	1	0.0102887	-0.0591151	0.0085398	-0.000158073	-0.0416702	-0.0257971	4.57165	3	0.127353	4.70009	5	0.221484	4.93732	6	0.444075	4.81072	6	0.284607	#NUM!	0		4.75448	9	0.253599	4.7554	11	0.250277	4.63587	8	0.165006	4.87402	12	0.361019	0.463198	0.334233	0.785668
FT300	FT300	36.0521	354.204	Pipercide;4-(dimethylamino)-4-hydroxy-3-methyl-1,2-diphenylb		354.203	354.21	35.1215	37.9127	13	252;1016;2476;4086;5024;5805;8474;9877;10622;12000;15537;16342;19355		0	0.0216771	0.00996614	-0.05885	-0.0892335	0.0103206	-0.091493	4.91359	4	0.374308	4.70017	3	0.222591	4.53138	1	0.118494	4.66878	3	0.197121	#NUM!	0		4.72249	5	0.234773	4.68447	6	0.204873	4.80688	7	0.285714	4.60008	4	0.157254	0.463206	0.334226	0.785668
FT109	FT109	457.168	203.067	L-beta-aspartyl-L-alanine;gamma-Glutamylglycine;Alanyl-Aspar		203.067	203.068	455.85	458.262	19	94;874;1600;2321;3093;3898;5624;6593;7466;8330;9716;10468;11182;13240;14661;15371;17015;18419;19210	74.02473;82.02964;84.04551;85.04073;111.0559;112.0278;113.0353;113.072;128.035;141.0664;167.0459;185.0564|19404.57446676;3758.17243410526;2021.9818909387;2820.46630776047;840.736589364912;672.359905354892;1657.75167918718;1162.23924427638;21578.3141766737;22929.6312357544;1446.11413222991;9728.25074248069	1	-0.0557119	-0.0134748	0.0151306	-0.0587087	-0.00797105	-0.00713733	5.05427	5	0.471761	4.93574	5	0.413068	4.78356	3	0.292359	4.83915	4	0.30897	#NUM!	0		4.91891	8	0.385382	4.88745	9	0.356589	4.99501	10	0.442968	4.81136	7	0.301218	0.468844	0.328971	0.793705
FT101	FT101	447.547	194.946	cis-2-Chloro-4-carboxymethylenebut-2-en-1,4-olide		194.946	195.051	429.413	449.078	22	88;867;868;1590;2315;2316;3085;3086;3888;5615;6582;7454;7455;9711;12450;12451;13230;15363;16166;16167;17010;18413	59.01415;75.00868;195.0504|359.031721319749;851.652714544715;670.357986828715	1	-0.0961014	-0.0189947	-0.00346744	-0.0153298	-0.0644038	-0.0296113	5.12252	5	0.512735	4.93651	3	0.415282	4.7378	2	0.256921	4.96193	4	0.431894	#NUM!	0		4.93016	7	0.396456	4.94922	7	0.413068	5.02951	8	0.473976	4.84986	6	0.334441	0.471954	0.3261	0.797439
FT468	FT468	373.142	549.907			549.905	549.911	372.148	373.52	13	396;1150;1880;2627;3403;4287;5986;6935;7814;10013;13534;15692;18740		0	-0.0488362	0.00159011	0.0120327	-0.0339799	-0.0502161	-0.00197526	5.12229	5	0.511628	5.02125	3	0.472868	4.84579	1	0.355482	4.9229	2	0.396456	#NUM!	0		4.98404	6	0.45072	4.97207	5	0.44186	5.07177	8	0.501661	4.88435	3	0.379845	0.473176	0.324977	0.797976
FT116	FT116	90.2073	211.01	Nitroxoline;4-Nitroquinoline 1-oxide;Ureidosuccinic acid		211.01	211.01	90.1767	92.9348	3	2330;3101;7474		0	-0.0173181	0.020939	-0.000237909	-0.00986159	-0.00127096	0.0110418	4.46777	2	0.0753045	4.37528	1	0.0376523	4.31193	0	0.0243632	4.31193	0	0.0243632	#NUM!	0		4.38985	2	0.0321152	4.3436	1	0.0321152	4.42153	3	0.0409745	4.31193	0	0.0243632	0.475682	0.322683	0.800671
FT568	FT568	278.291	687.545	Faradiol myristate;Glycerol 1,2-didodecanoate 3-tetradecanoa		687.543	687.546	275.893	281.586	26	486;1229;1960;2717;3506;4407;5215;6097;7041;7931;8679;9355;10099;10827;11542;12134;12847;13619;14264;14994;15785;16574;17407;18079;18835;19548	78.95907;168.0428;449.3146;598.46;616.4709;685.4274;687.5463;688.5489|6609.23742497398;42297.6066678115;2081.56997800379;444.838325752494;2023.31354440188;2705.77676060149;784187.714856523;1484.45803265254	1	0.0114385	0.00269796	-0.00587799	-0.00588736	0.0307941	0.012983	5.5924	6	0.792913	5.54392	6	0.779623	5.63122	6	0.836102	5.59515	6	0.796235	#NUM!	0		5.61181	12	0.818383	5.56954	12	0.784053	5.56816	12	0.787375	5.61318	12	0.826135	0.476831	0.321635	0.800748
FT129	FT129	41.6045	223.029	(-)-3-Cyanomethyl-3-hydroxy-1H-indol-2(3H)-one;methyl quinox		223.028	223.033	38.7052	42.9721	17	888;1615;2341;4904;6612;8346;9024;9731;11199;11895;12474;13990;14679;15387;17800;18439;19225	74.99059;149.0089;206.9963;223.0277|1511.42705158066;2402.17739997274;1025.47421677405;10175.8246079236	1	0.0398491	0.0222933	0.0290369	0.0240494	0.0143801	0.053849	5.08623	3	0.492802	5.22106	4	0.6268	5.29831	5	0.678848	5.20174	4	0.601329	#NUM!	0		5.19227	8	0.602436	5.2114	8	0.610188	5.15364	7	0.555925	5.25002	9	0.645626	0.478217	0.320375	0.800748
FT572	FT572	435.735	689.175	C.I. Acid Green 3;NCGC00169930-02_C30H38O16_(1aS,1bS,2S,5aR,		689.174	689.178	434.609	436.661	14	489;1232;1963;2720;3510;4410;6100;7934;8682;9358;10830;12851;15788;17410		0	-0.0519689	0.0573704	-0.028961	-0.0292673	0.030879	-0.00450412	5.18682	5	0.566999	5.05654	4	0.506091	4.76383	1	0.275748	4.78926	2	0.266888	#NUM!	0		4.97532	6	0.439646	4.9229	6	0.383167	5.12168	9	0.535991	4.77654	3	0.276855	0.479625	0.319098	0.800748
FT015	FT015	462.449	96.9619	1,2-Dichloroethane;Sulfate		96.9613	96.9624	460.054	464.561	26	13;796;1500;2241;3002;3799;4803;5534;6496;7362;8260;8933;9643;10390;11093;11811;12369;13161;13898;14583;15278;16085;16926;17717;18338;19133		0	-0.00327388	0.0114534	0.00395686	0.00467772	-0.0065758	0.00429609	5.90365	6	0.890365	5.93041	6	0.904762	5.91954	6	0.908084	5.87606	6	0.890365	#NUM!	0		5.91159	12	0.905869	5.90324	12	0.898117	5.91703	12	0.899225	5.8978	12	0.899225	0.479957	0.318798	0.800748
FT722	FT722	253.974	788.543	2-amino-3-[hydroxy-[3-octadecanoyloxy-2-[octadec-11-enoyl]ox	+	788.542	788.545	251.964	256.686	4	3620;7166;10937;17531	227.2014;251.2022;253.2168;255.2333;279.2331;281.2482;283.2431;283.2639;303.2323;327.2334;329.2467;419.2576;437.2672;452.281;478.2909;701.5124;714.5096;716.5253;788.5424|915.531485241829;608.646760714386;2688.03359678442;470.949602122374;2697.54447765829;677.43022776551;213.699773310893;456.582716442685;71.8312284918738;784.268965360585;195.524541907554;475.751688862556;190.119650194151;168.29225…	1	-0.0187298	0.0132937	0.0162564	0.0336884	0.00650379	-0.0233902	4.9733	1	0.419712	5.09237	2	0.529347	4.88106	0	0.39258	4.99944	1	0.462901	#NUM!	0		4.92718	1	0.394241	5.0459	3	0.506091	5.03283	3	0.475083	4.94025	1	0.425249	0.480451	0.318351	0.800748
FT521	FT521	482.467	604.098			604.071	604.122	479.419	489.016	21	438;1189;2671;3449;4347;5180;6040;8641;9316;10051;11502;12802;13576;14238;14959;15737;16532;17361;18048;18785;19512	124.007;143.0457;195.0442;221.0239;221.0601;253.0328;254.0782;272.0886;297.0218;299.0377;304.0613;330.9723;331.0097;338.0482;475.0638;479.0898;586.0953;604.1055|8140.71787040124;949.805152492496;3197.23078137475;3241.95171055839;78485.4130933074;945.420147840018;650.591580538109;5520.73811763723;1862.42183304969;1246.63051890527;1910.17491099223;798.951665812922;3748.26582492944;5909.84468917391;…	1	-0.0212538	-0.00804894	-0.0021773	-0.02436	0.0671242	0.0251565	5.24357	5	0.605759	5.06561	3	0.513843	5.12901	5	0.582503	5.2314	6	0.619048	#NUM!	0		5.18629	10	0.596899	5.14851	9	0.566999	5.15459	8	0.560354	5.18021	11	0.600221	0.481401	0.317493	0.800748
FT009	FT009	88.5256	80.9174			80.9173	80.9176	86.7866	94.3736	26	7;790;1494;2235;2996;3793;4797;5528;6489;7356;8255;8928;9637;10385;11087;11805;12362;13155;13892;14576;15272;16079;16921;17710;18332;19128		0	0.00595949	0.0250449	-0.0211168	0.00197534	0.0227261	-0.0266474	6.29416	6	0.964563	6.23774	6	0.953488	6.19226	6	0.957918	6.25738	6	0.960133	#NUM!	0		6.24321	12	0.963455	6.24756	12	0.959025	6.26595	12	0.959025	6.22482	12	0.962348	0.482083	0.316878	0.800748
FT420	FT420	483.524	506.055	desbutyl-lumefantrine		506.054	506.056	481.978	485.272	11	356;1113;2586;3361;4236;5938;6894;7769;10717;15650;18698	78.95876;96.96914;110.0244;111.0088;128.0345;172.0624;184.9854;196.0619;216.0505;240.0509;284.0409;302.0515;320.0622|525.695806568443;740.841585697613;1699.25110671585;174.290402410519;1408.05456221962;218.828269908632;5721.21445631275;369.151389692531;302.956836490155;6431.4834963957;545.531344880118;5564.99720048437;3071.40518236872	1	-0.0539124	-0.00369811	0.0159347	-0.0151201	-0.0684033	-0.0500661	4.68472	4	0.20155	4.83661	3	0.305648	4.41567	0	0.0509413	4.66192	2	0.193798	#NUM!	0		4.55019	4	0.110742	4.74927	5	0.24474	4.76066	7	0.253599	4.53879	2	0.119601	0.486406	0.313001	0.80641
FT360	FT360	471.036	445.048	Cefuroxime;CDP-Ethanolamine;BL V		445.043	445.052	470.173	471.357	5	1791;6839;9203;12669;15595	78.95915;96.96947;110.0367;138.9796;150.98;158.925;163.0543;174.98;176.9366;181.0621;183.9568;184.9846;192.9898;201.9677;211.0017;219.9791;254.9489;272.9573;279.0409;286.0275;304.0336;322.0448;334.0106;340.9929;347.0391;347.0576;365.9942;384.0013;402.0474;427.0401;443.6594;443.6757;445.0536|4407.29362250278;803.845448849335;121.717659741786;177.979070657578;83.442396060201;2354.7077666412;32.2488…	1	-0.010759	0.0146568	0.00169707	0.0394783	-0.0258	0.00353131	4.9529	1	0.404208	5.05049	2	0.502769	4.99035	1	0.482835	4.9654	1	0.434109	#NUM!	0		4.97162	2	0.437431	5.00795	3	0.473976	5.00169	3	0.447398	4.97788	2	0.457364	0.488327	0.311289	0.808076
FT529	FT529	487.33	610.112	2-amino-4-[(2-{[1-carboxy-2-(6,7-dimethoxy-2H-1,3-benzodioxo		610.111	610.165	485.272	497.985	10	3458;3460;4357;5186;6051;9320;10057;10794;11510;15745	124.007;166.0176;208.0279;225.0517;250.0396;253.0463;268.0483;271.0568;272.0882;304.0603;305.0437;306.0754;338.0486;610.1142;610.1666|1342.37208686921;3626.32826899385;574.319456179443;528.737600893568;620.772092504851;1248.09510643939;1166.83441214954;918.336632226448;510.205224398214;205.51353583129;358.268931418024;501.000334723932;306.855593036931;4756.42985539297;25795.4838853849	1	-0.0199288	0.0265222	-0.0325343	-0.00743102	-0.0066991	0.0235912	4.68048	4	0.193798	4.52013	3	0.0963455	4.36749	1	0.0321152	4.32368	1	0.0310078	#NUM!	0		4.52399	5	0.0941307	4.42191	4	0.0531561	4.60031	7	0.127353	4.34559	2	0.0276855	0.489633	0.31013	0.808651
FT179	FT179	301.993	268.077	3-(4-hydroxyphenyl)-N-(4-oxobutyl)prop-2-enimidic acid;Ferul		268.076	268.078	300.3	303.124	26	155;928;1664;2382;3156;3968;4942;5687;6666;7530;8382;9074;9775;10529;11236;11931;12514;13293;14024;14718;15431;16237;17075;17834;18483;19266		0	-0.0192169	-0.0238056	-0.0153588	-0.00683435	-0.0471744	0.0120323	5.70574	6	0.838317	5.61685	6	0.810631	5.67036	6	0.846069	5.58092	6	0.785161	#NUM!	0		5.68805	12	0.847176	5.59888	12	0.801772	5.66129	12	0.82835	5.62564	12	0.829457	0.491153	0.308784	0.808651
FT617	FT617	244.996	728.555	PC(15:0/P-18:1(11Z));PC(15:0/P-18:1(9Z));PE(18:0/P-18:1(11Z)		728.546	728.559	239.576	247.035	23	529;1268;2757;4462;5256;6152;7973;8716;9399;10140;10866;11578;12156;12893;13655;14298;15031;15829;16617;17450;18111;18873;19585	267.2345;269.2501;279.2328;280.2349;281.2477;282.2535;308.2684;309.2803;436.2835;446.302;464.3132;726.3193;728.4632;728.5284;728.5599|188.995653093866;68.3777144911659;685.20024948142;108.513277342263;2003.94890530997;33.943797304164;33.9957236615646;356.552532309772;31.6510968083207;96.0371492607578;148.747651376391;34.03171357877;54.5311793197016;1528.2728315549;4613.69051533129	1	0.0287933	-0.0485089	-0.0263419	-0.0294612	0.0159862	-0.00562266	4.91298	4	0.3732	4.79215	5	0.281285	5.07873	6	0.541528	5.00788	6	0.471761	#NUM!	0		4.99585	10	0.457364	4.90002	11	0.366556	4.85257	9	0.331118	5.04331	12	0.512735	0.492596	0.307509	0.808651
FT207	FT207	482.564	284.041	Ascorbalamic acid;Gemcitabine;CGS 15943		284.04	284.041	481.571	483.794	13	1685;2403;3177;5709;6694;7556;9089;12534;14738;16260;17090;18506;19282	110.0238;152.0719;196.0612|420.764092958635;384.284200265284;171.511175443437	1	-0.0299719	0.00303842	-0.00351048	0.0218996	0.040913	-0.0205276	4.59485	4	0.139535	4.49301	3	0.076412	4.42346	2	0.0575858	4.57019	4	0.14175	#NUM!	0		4.50915	6	0.0874862	4.5316	7	0.104097	4.54393	7	0.0952381	4.49682	6	0.0919158	0.492919	0.307224	0.808651
FT570	FT570	278.291	688.548			688.547	688.55	275.893	281.586	26	488;1231;1962;2719;3508;4409;5217;6099;7043;7933;8681;9357;10101;10829;11544;12135;12849;13621;14265;14995;15787;16575;17409;18081;18837;19550		0	0.0120461	0.00237044	-0.00589934	-0.00578219	0.0300904	0.0122806	5.22241	6	0.59247	5.17575	6	0.58804	5.2642	6	0.6567	5.22736	6	0.614618	#NUM!	0		5.2433	12	0.631229	5.20156	12	0.606866	5.19908	12	0.591362	5.24578	12	0.641196	0.493573	0.306648	0.808651
FT007	FT007	88.5256	78.9194			78.9193	78.9196	86.7866	94.3736	26	4;787;1492;2232;2993;3789;4794;5524;6486;7353;8252;8926;9634;10383;11084;11803;12359;13152;13890;14573;15269;16076;16918;17708;18328;19125		0	0.0061312	0.0248372	-0.0208626	0.00164869	0.0228665	-0.0267244	6.29117	6	0.962348	6.2365	6	0.952381	6.19156	6	0.956811	6.25542	6	0.957918	#NUM!	0		6.24137	12	0.962348	6.24596	12	0.957918	6.26384	12	0.957918	6.22349	12	0.96124	0.494176	0.306119	0.808651
FT870	FT870	245.471	920.624	PS(20:1(11Z)/24:1(15Z));PS(20:2(11Z,14Z)/24:0);PS(22:0/22:2(		920.622	920.627	243.066	247.195	26	737;1460;2189;2944;3739;4722;5461;6415;7297;8194;8896;9584;10345;11046;11769;12314;13104;13862;14517;15230;16028;16855;17674;18300;19087;19761	92.02519;135.0309;136.0336;279.2327;281.2483;769.5586;770.5712;920.5146;920.626;920.7066|773.393097930918;81749.966448209;2773.78275707303;1271.22581597366;1154.74120157102;665.576032786544;16718.0781260135;993.988048702215;136939.215912664;596.033444696815	1	0.00886064	-0.0137507	0.00368208	-0.00174695	-0.0109448	0.00745619	5.6387	6	0.812846	5.68127	6	0.833887	5.70156	6	0.856035	5.69334	6	0.839424	#NUM!	0		5.67013	12	0.842746	5.68731	12	0.833887	5.65998	12	0.827243	5.69745	12	0.847176	0.498527	0.302311	0.814261
FT404	FT404	32.5458	489.277	Ubiquinone-4;13'-Carboxy-alpha-tocotrienol;Ceanothenic acid		489.274	489.277	30.3863	33.0953	12	344;3347;4215;8560;12713;13490;14888;16438;17271;17990;18683;19438	251.0474;267.079;268.0869;283.1106;489.2742|919.69719354737;4748.07165101864;1736.99043261791;124380.331708209;14626.0172550204	1	-0.00756507	-0.0179039	0.0148728	0.0237749	0.0465956	0.0165073	4.61582	2	0.155039	4.5281	1	0.0985604	4.6559	3	0.200443	4.81895	5	0.293466	#NUM!	0		4.63586	5	0.172757	4.67353	6	0.192691	4.57196	3	0.114064	4.73742	8	0.246955	0.501291	0.29991	0.816772
FT678	FT678	276.856	765.567	SM(d18:0/18:1(11Z));SM(d18:0/18:1(9Z));stearoyl sphingomyeli		765.566	765.569	275.209	280.36	22	578;1319;2047;2799;3592;5308;6218;8030;9432;10187;11629;12189;12945;13705;14350;15086;15878;16678;17496;18152;18920;19625	168.0427;303.2327;687.5434;689.5512;690.554;691.5564;713.5621;715.5781;765.3777;765.4252;765.4624;765.5283;765.5688|1093.74838183836;165.652531020623;697.538552759693;232.115902719283;258.831456857911;1792.84004636967;4657.78272113328;51385.0574338296;207.280850491611;249.209914326411;214.279394416144;927.026934379063;11254.8914296545	1	0.0388388	-0.000830536	-0.00502624	0.0086385	0.042608	0.00853507	4.95233	5	0.403101	4.84024	3	0.311185	5.15666	6	0.599114	5.10438	6	0.534884	#NUM!	0		5.05449	11	0.502769	4.97231	9	0.442968	4.89628	8	0.359911	5.13052	12	0.570321	0.501916	0.299369	0.816772
FT861	FT861	243.435	914.579	PE(DiMe(11,5)/MonoMe(13,5));PE(DiMe(13,5)/MonoMe(11,5));PE(M		914.577	914.582	240.803	245.418	23	731;1454;2182;2937;3734;4716;6409;7292;8187;8890;10339;11039;11763;13098;13856;14511;15224;16023;16848;17668;18294;19082;19755	135.0308;722.5144;764.5262;914.5124;914.5798;914.6534|8771.2772367743;988.106236316071;1744.61061979777;513.614725077366;13657.5103600266;541.240085642909	1	-0.0385382	-0.0326559	0.0234297	0.00949605	-0.00788076	0.0156478	5.01377	5	0.45072	5.11041	5	0.54485	5.07779	5	0.540421	5.16486	6	0.578073	#NUM!	0		5.04578	10	0.497231	5.13763	11	0.561462	5.06209	10	0.496124	5.12133	11	0.563677	0.504356	0.297262	0.818778
FT824	FT824	287.028	871.542	PGP(a-13:0/i-24:0);PGP(i-12:0/a-25:0);PGP(i-13:0/i-24:0)		871.522	871.549	285.108	289	25	701;1429;2158;2908;3709;4678;5427;6374;7262;8154;8861;9537;10307;11733;12278;13070;13829;14476;15196;15996;16815;17637;18265;19057;19725	241.0119;269.2481;303.2349;305.246;365.3378;403.2648;405.2386;405.2807;567.2917;567.3113;585.3037;784.5891;797.638;797.6561;827.5193;868.8418;871.5443;871.6762;872.5459|178.830942806188;184.87212441041;293.435092546105;32.3579402672976;35.3998045449543;40.5728472957321;164.948732185405;30.5056903809259;168.427815533323;42.1080118735063;54.9898708110277;70.7412246965077;38.0412566165887;90.3488381…	1	0.0213002	-0.0162653	0.00810427	-0.0132457	-0.00235498	0.0360738	4.94803	6	0.401993	4.88301	5	0.368771	5.12237	6	0.573643	5.00686	6	0.468439	#NUM!	0		5.0352	12	0.48505	4.94494	11	0.410853	4.91552	11	0.38206	5.06462	12	0.527132	0.505886	0.295947	0.818778
FT030	FT030	370.187	126.003	2-Acetylthiazole		126.003	126.004	369.059	371.383	13	3015;3815;5548;6513;7379;8274;9657;12382;13175;14598;16101;16943;18352	81.95347;126.0033|8361.98448617657;2004.85779023145	1	-0.0343565	-0.0266607	0.0167037	0.0114258	0.00929197	-0.0042133	4.75825	3	0.258029	4.85334	4	0.322259	4.7854	3	0.293466	4.75686	3	0.245847	#NUM!	0		4.77183	6	0.273533	4.8051	7	0.294574	4.8058	7	0.284607	4.77113	6	0.271318	0.5062	0.295678	0.818778
FT781	FT781	289.329	838.554	Phosphatidylethanolamine alkenyl 20;Phosphatidylethanolamine		838.55	838.56	286.69	291.597	25	664;1391;2130;2874;3676;4636;5401;6331;7228;8118;8830;9506;10266;10983;11699;12251;13031;13790;14439;15964;16770;17592;18231;19015;19693		0	0.00360761	0.0110729	-0.0073098	-0.00317348	-0.00850899	0.0124154	5.13245	6	0.52381	5.08948	6	0.527132	5.07368	5	0.537099	5.15009	6	0.566999	#NUM!	0		5.10306	11	0.534884	5.11978	12	0.548173	5.11097	12	0.527132	5.11188	11	0.557032	0.507635	0.294448	0.818778
FT872	FT872	245.452	922.637	PE-NMe2(22:6(4Z,7Z,10Z,13Z,16Z,19Z)/24:1(15Z));PE-NMe2(24:1(		922.634	922.639	243.719	248.002	25	739;1462;2191;2946;3741;4724;5463;6417;8196;8898;9586;10347;11048;11771;12316;13106;13864;14519;15232;16030;16857;17676;18302;19089;19763		0	0.0232847	-0.0123665	-0.0109052	-0.0121652	0.00798756	0.00951726	5.15751	6	0.545958	5.09054	5	0.528239	5.29719	6	0.675526	5.22673	6	0.612403	#NUM!	0		5.22735	12	0.623477	5.15863	11	0.574751	5.12402	11	0.538206	5.26196	12	0.651163	0.507791	0.294315	0.818778
FT426	FT426	268.79	508.276	Beauverolide I;Beauverolide I		508.275	508.277	267.048	269.556	6	4241;5943;10720;12728;16456;18701		0	-0.0138428	-0.0246693	-0.0283401	0.0219407	0.00521534	-0.0456481	4.92955	2	0.386489	4.87166	1	0.337763	4.87449	1	0.375415	5.00759	2	0.470653	#NUM!	0		4.90202	3	0.3732	4.93962	3	0.406423	4.90061	3	0.368771	4.94104	3	0.427464	0.511004	0.291576	0.819792
FT569	FT569	435.834	688.172	2-amino-4-({1-[(carboxymethyl)-C-hydroxycarbonimidoyl]-2-[(4		688.171	688.174	434.609	436.661	22	487;1230;1961;2718;3507;4408;5216;6098;7042;7932;8680;9356;10100;10828;11543;12848;13620;15786;17408;18080;18836;19549	78.95898;96.96934;134.0467;138.9797;150.9798;192.9904;211.001;344.9956;346.0559;347.06;688.1723;688.3119|19948.2779716402;6349.99265290938;4513.71674203364;723.826206998528;3643.52297083633;2099.93183298094;16593.9888652273;3209.90169685351;961945.453181891;579.100823016182;25031.2292990517;987.256334105086	1	-0.0923182	0.0963397	-0.0111886	-0.063764	0.0636577	0.0519879	5.74879	6	0.853821	5.6021	6	0.801772	5.00426	3	0.48948	5.25775	5	0.637874	#NUM!	0		5.37653	9	0.706534	5.42993	11	0.733112	5.67545	12	0.833887	5.13101	8	0.572536	0.511338	0.291292	0.819792
FT890	FT890	239.1	968.606			968.597	968.621	234.174	241.484	26	758;1476;2207;2963;3757;4746;5485;6442;7322;8217;8913;9608;10362;11065;11790;12336;13125;13878;14542;15253;16050;16875;17695;18316;19108;19780		0	0.00365529	-0.0247158	-0.00792551	-0.0173118	-0.0150146	0.00914887	4.92816	6	0.383167	4.87318	6	0.339978	4.99544	6	0.488372	4.9141	6	0.383167	#NUM!	0		4.9618	12	0.425249	4.89364	12	0.362126	4.90067	12	0.369878	4.95477	12	0.431894	0.5123	0.290475	0.819792
FT467	FT467	469.034	549.063	NCGC00385232-01!(2S,3R,4R)-3,4-bis[[(E)-3-(3,4-dihydroxyphen		549.062	549.066	467.492	469.864	20	395;1149;4286;5144;5985;6934;7813;8601;10012;10754;11467;13533;14204;14923;15691;16495;17318;18017;18739;19477	78.95899;96.96944;138.9795;168.9906;199.0013;229.013;259.0222;271.0237;271.0575;289.0333;428.024;430.0322;549.0624|1796.89005368899;12760.9229100243;1483.37767966978;1596.58854809152;9296.20640560562;463.196070116645;13431.1281864382;389.441572061727;899.513462343586;68399.6691844648;416.260828160159;1314.84009919394;7983.67099419907	1	-0.0284141	-0.0997316	0.0285168	-0.0208532	-0.0354447	0.00638631	4.86297	3	0.330011	5.03166	5	0.488372	5.03672	4	0.507198	5.16451	6	0.576966	#NUM!	0		4.94985	7	0.415282	5.09808	11	0.528239	4.94731	8	0.40753	5.10062	10	0.550388	0.512363	0.290422	0.819792
FT459	FT459	301.655	535.154	Fluticasone propionate;Fluticasone propionate (Flonase, Vera		535.153	535.155	300.3	303.124	25	388;1143;1875;2619;3395;4278;5138;5975;6926;7804;8595;10005;10749;11459;12087;12755;13526;14198;14915;15684;16487;17311;18013;18731;19470	134.6233;135.031;177.0415;266.2573;267.0739|714.017695456877;301482.628595597;1106.50578182004;4242.81159796558;1123792.01511655	1	-0.0316366	-0.0517877	-0.0188274	-0.0159072	-0.0609413	0.0283125	5.59775	6	0.796235	5.47035	5	0.745293	5.55583	6	0.808416	5.44642	6	0.733112	#NUM!	0		5.57679	12	0.800664	5.45838	11	0.746401	5.53405	11	0.775194	5.50113	12	0.770764	0.513067	0.289826	0.819792
FT178	FT178	301.993	267.074	STD_Inosine;Inosine;INOSINE	+	267.073	267.075	300.3	303.124	26	153;927;1663;2380;3155;3967;4941;5684;6665;7529;8380;9072;9774;10527;11235;11929;12513;13292;14023;14716;15430;16235;17072;17833;18482;19264	65.01456;65.99858;79.03;80.02541;92.02546;106.0406;108.0203;133.0152;134.023;134.6226;135.0316;135.6184;135.6862;147.0306;149.0464;177.0416;201.0412;231.0517;249.0626;266.2584;267.0739|14363.3261132957;10693.3090068588;873.555492798843;45531.2056692391;194857.274055378;1723.96844577598;267795.411254118;4739.94210317278;16391.6241419019;13702.1914891837;4230695.8853252;2656.7252690853;1644.8238692…	1	-0.0239036	-0.0282647	-0.0165641	-0.00815409	-0.052398	0.010021	6.65344	6	0.985604	6.5609	6	0.984496	6.59712	6	0.987818	6.51336	6	0.980066	#NUM!	0		6.62528	12	0.988926	6.53713	12	0.983389	6.60717	12	0.984496	6.55524	12	0.985604	0.518939	0.284884	0.824641
FT456	FT456	267.943	533.287	1-Stearoylglycerophosphoglycerol;2-Stearoylglycerophosphogly		533.286	533.288	265.771	271.931	13	385;1873;3393;4276;5136;5973;6925;7801;10002;12753;15681;16484;18729	152.9956;227.0325;253.0298;256.2365;279.233;305.248;481.3104;533.287|1103.15988018334;257.073677883976;128.555209245638;451.886624843576;658.355729062384;10818.6867708543;829.876408748245;13678.6213128842	1	-0.0504723	-0.0112964	-0.0333868	0.0281454	-0.0348909	-0.00943262	4.90722	5	0.368771	4.79587	3	0.283499	4.58796	1	0.160576	4.79107	3	0.267996	#NUM!	0		4.74759	6	0.249169	4.79347	6	0.283499	4.85155	8	0.330011	4.68952	4	0.219269	0.520518	0.283564	0.824641
FT615	FT615	243.13	726.543	PE(18:1(11Z)/P-18:1(11Z));PE(18:1(11Z)/P-18:1(9Z));PE(18:1(9		726.541	726.545	238.171	246.153	26	527;1266;1999;2755;3549;4458;5252;6148;7082;7971;8714;9397;10138;10864;11576;12154;12891;13653;14296;15029;15827;16615;17448;18109;18871;19583	279.2328;280.236;281.2484;282.2516;305.248;306.2521;307.2631;436.2826;444.2882;446.3039;462.2985;464.3149;724.3068;726.5455;726.6007|20455.2083327665;1276.20905728126;28483.5212794517;304.080656473445;1389.67295146307;1453.34345653974;4473.21715030676;318.269106760522;1268.731302828;790.085718997676;3074.83469138264;2373.61814817647;296.799205834213;97708.2712867618;233.165255984511	1	0.0163533	-0.0350462	-0.0160093	-0.0108005	-0.00167047	0.000900752	5.33164	6	0.653378	5.26434	6	0.642303	5.42845	6	0.747508	5.38348	6	0.708749	#NUM!	0		5.38005	12	0.713178	5.32391	12	0.678848	5.29799	12	0.653378	5.40596	12	0.724252	0.521893	0.282418	0.824641
FT733	FT733	252.512	794.577	PC(15:0/22:4(7Z,10Z,13Z,16Z));PC(22:4(7Z,10Z,13Z,16Z)/15:0);		794.571	794.58	245.831	258.719	25	621;1348;2086;2832;3630;4585;5354;7178;8068;8792;9467;10223;10943;11660;12216;12987;13741;14393;15130;15917;16728;17542;18184;18964;19657	255.2342;256.2352;279.2321;281.2487;283.2653;287.2739;303.233;305.2468;329.2486;330.2507;331.2638;332.2644;480.3079;508.3425;510.3014;719.5445;720.5485;742.537;744.5587;794.5095;794.571|124.406471090818;49.8600504019578;52.049703818443;107.062446307;506.88154965359;35.6707733026155;416.57381323117;47.0659643098543;68.7396831231126;62.7247606964829;1222.19352629974;39.897777638248;79.3340149938103…	1	0.0224409	-0.00693554	0.0176203	0.0263407	0.00684835	0.0224083	5.33314	5	0.654485	5.39964	6	0.716501	5.60787	6	0.825028	5.55378	6	0.772979	#NUM!	0		5.47051	11	0.765227	5.47671	12	0.75526	5.36639	11	0.696567	5.58082	12	0.802879	0.522685	0.28176	0.824641
FT261	FT261	34.3867	321.21	NCGC00380425-01!1-(3,5-dihydroxyphenyl)-12-hydroxytridecan-2	+	321.208	321.21	34.3579	35.3855	3	5762;10592;11981	79.9575;95.95338;96.66899;96.96043;265.1485;320.2285;321.1168;321.2113;321.2514|387.676779903634;55.9379980379816;36.4192585796758;9172.69604112996;179.347097714125;177.762994377588;42.2397340906741;40625.2827380728;34.7046667723447	1	0.00860849	-0.00813187	-0.0250907	-0.0464986	0.00979827	-0.0450193	4.87015	1	0.339978	4.75741	1	0.251384	4.77132	1	0.284607	4.70724	0	0.219269	#NUM!	0		4.82073	2	0.315615	4.73232	1	0.228128	4.81378	2	0.293466	4.73928	1	0.249169	0.523318	0.281234	0.824641
FT534	FT534	508.974	614.146	2-amino-4-({1-[(carboxymethyl)-C-hydroxycarbonimidoyl]-2-{[3		614.144	614.147	508.291	510.243	17	450;1201;1930;2682;3466;4362;5191;7000;7884;8650;10062;11514;12813;14245;15749;16543;17372		0	-0.0464965	0.0206576	-0.0200253	0.0300646	-0.0270326	0.0523904	5.14046	5	0.529347	5.0194	4	0.471761	4.88793	3	0.40753	4.94338	3	0.414175	#NUM!	0		5.01419	8	0.469546	4.98139	7	0.452935	5.07993	9	0.511628	4.91565	6	0.40753	0.524537	0.280224	0.824641
FT834	FT834	286.691	887.561	PI(16:0/20:0);PI(18:0/18:0);PI(20:0/16:0)		887.559	887.564	285.108	289	26	710;1439;2166;2916;3720;4695;5437;6384;7274;8166;8869;9550;10315;11024;11743;12288;13078;13839;14487;15204;16005;16826;17645;18274;19064;19734		0	0.0353873	-0.0118695	0.00192463	-0.00823942	0.0222818	0.0105698	5.77416	6	0.866002	5.72148	6	0.848283	5.96525	6	0.922481	5.90993	6	0.899225	#NUM!	0		5.8697	12	0.899225	5.8157	12	0.881506	5.74782	12	0.863787	5.93759	12	0.910299	0.524873	0.279946	0.824641
FT272	FT272	62.9509	333.207	NCGC00380721-01_C20H30O4_2-Hydroxy-4,5',8a'-trimethyl-1'-oxo	+	333.206	333.208	61.5993	63.457	16	235;1728;2457;3231;4056;5778;7617;8454;9141;10603;11312;12593;14794;15516;16323;18562	57.03482;59.01401;109.0656;113.0969;121.0656;135.0812;137.097;161.097;163.1126;173.0973;175.1126;185.1167;189.1281;191.144;204.1155;206.1312;207.1024;209.1183;217.1234;219.1027;221.1185;235.134;271.207;289.2177;297.1867;315.1969;333.2074;333.276|949.792975583395;295.870264707218;2026.35301299853;3977.5639544928;963.255779145974;606.380856077509;1014.28769798337;500.414683838835;2799.552848532;260…	1	-0.0441435	-0.00701273	-0.0399805	0.013724	0.0142447	-0.000311646	5.08843	5	0.493909	4.9778	4	0.444075	4.96774	3	0.470653	4.9768	3	0.440753	#NUM!	0		5.02809	8	0.478405	4.9773	7	0.449612	5.03311	9	0.47619	4.97227	6	0.451827	0.525263	0.279623	0.824641
FT244	FT244	444.72	308.098	N-Acetylneuraminic acid;N-Acetyl-a-neuraminic acid;N-Acetyln		308.096	308.099	442.851	447.07	26	209;975;1711;2435;3208;4028;4990;5745;6726;7593;8431;9120;9827;10579;11290;11970;12569;13350;14070;14768;15490;16295;17120;17879;18537;19310	102.0558;128.035;146.0457;200.0564;218.0669;308.098|5572.74705448758;13861.9373870053;24295.5764676017;2724.06063799264;2342.62897336845;443.300273873297	1	-0.0222209	-0.00950937	0.00870488	-0.0210065	-0.0123771	0.0152858	5.12707	6	0.51938	5.1897	6	0.603544	5.07974	6	0.54485	5.14715	6	0.564784	#NUM!	0		5.10341	12	0.535991	5.16842	12	0.582503	5.15838	12	0.565891	5.11345	12	0.560354	0.525373	0.279532	0.824641
FT438	FT438	473.716	519.052	Hamamelitannin;1,2-Digalloyl-beta-D-glucopyranose;1,6-Digall		519.051	519.053	472.756	475.171	22	370;1127;2601;4256;5124;5956;6907;7785;8581;9259;9987;10733;11447;13510;14187;14901;15665;16467;17295;18004;18713;19454	78.95912;96.96955;138.98;168.9904;199.0013;223.0015;241.0119;258.2313;259.023;338.9888;519.0527|20936.9796468601;103355.270428688;17023.5453967197;22818.3677307563;40733.894567595;4899.82602054739;4245.4412464302;1513.22841451075;450064.006228964;2410.46845816095;47996.5158388801	1	-0.0299594	-0.111608	0.0452338	-0.0220654	-0.0127652	0.00781748	5.40161	4	0.698782	5.57499	6	0.79402	5.60128	4	0.821705	5.87026	6	0.889258	#NUM!	0		5.50145	8	0.775194	5.72262	12	0.850498	5.4883	10	0.754153	5.73577	10	0.863787	0.526377	0.278703	0.824641
FT284	FT284	401.462	345.016	6-Chlorocatechin;De-O-methylsterigmatocystin;Aurantricholide		345.014	345.019	399.802	403.327	20	1735;2467;3244;4073;5017;6763;8462;9150;9865;10612;11321;11994;12602;13383;14098;15526;17156;17908;18573;19344		0	0.0194544	0.0270387	0.0178605	0.0144065	-0.00520779	0.0130108	4.52151	5	0.100775	4.58817	5	0.138427	4.5879	5	0.159468	4.55593	5	0.129568	#NUM!	0		4.5547	10	0.112957	4.57205	10	0.125138	4.55484	10	0.101883	4.57192	10	0.14175	0.527838	0.277499	0.824641
FT111	FT111	121.581	205.035	2-Methylcitric acid;Homocitric acid;Methylisocitric acid		205.035	205.035	118.223	124.663	10	2324;3096;3900;7468;8332;11183;14663;15373;17017;19212	59.01403;71.01394;74.00094;89.02409;115.0028|293.392614171911;153.945051764293;188.22841354397;77.7094201716359;119.770258732143	1	-0.0145701	-0.00306483	0.0169106	-0.0200125	0.057435	0.0401285	4.70674	3	0.220377	4.62202	2	0.165006	4.6451	2	0.191584	4.73317	3	0.233666	#NUM!	0		4.67592	5	0.200443	4.6776	5	0.199336	4.66438	5	0.182724	4.68914	5	0.218162	0.528851	0.276667	0.824641
FT710	FT710	237.317	777.563	PG(18:0/18:0);PG(i-12:0/i-24:0);[3-[[2,3-dihydroxypropoxy]-h		777.56	777.565	230.385	240.19	15	599;1333;5331;6250;10204;11646;12203;13721;14374;15110;15897;16705;17521;18168;18944		0	0.026266	-0.0412649	0.00504603	-0.00804023	-0.00336628	-0.00303293	4.86579	2	0.333333	4.79762	1	0.286822	5.09115	5	0.55371	5.05688	5	0.508306	#NUM!	0		4.97847	7	0.444075	4.92725	6	0.388704	4.8317	3	0.310078	5.07402	10	0.532669	0.529182	0.276395	0.824641
FT835	FT835	287.047	888.564	PS(18:3(6Z,9Z,12Z)/24:1(15Z));PS(18:3(9Z,12Z,15Z)/24:1(15Z))		888.562	888.568	285.108	289	26	711;1440;2167;2917;3721;4697;5438;6385;7276;8167;8870;9551;10316;11025;11744;12289;13079;13840;14488;15205;16006;16827;17647;18275;19066;19735		0	0.035328	-0.0101266	0.0021155	-0.0105338	0.0184066	0.00744636	5.24007	6	0.604651	5.18935	6	0.602436	5.42106	6	0.745293	5.35724	6	0.69546	#NUM!	0		5.33057	12	0.683278	5.2733	12	0.655592	5.21471	12	0.599114	5.38915	12	0.72093	0.529191	0.276387	0.824641
FT142	FT142	43.2001	233.102	Mepirizole;Cysteinyl-Isoleucine;Cysteinyl-Leucine		233.098	233.104	41.3346	44.0603	13	122;1628;8357;10492;11210;12485;13263;13998;16201;17044;17810;18451;19237	74.99054;118.9621;132.9781;134.9934;143.0531;149.0093;151.0402;159.0842;215.0562;217.072;233.1033;233.1543|4242.1868641324;3985.35957373784;726.467098970262;5256.93159373522;3117.2337005121;29897.2614482564;1249.72691711858;834.049480270369;1361.91013283536;51960.2484178164;21819.6188311176;2504.90012102357	1	0.00548869	-0.00180462	0.0123561	0.0612254	0.036515	0.0130774	4.99379	1	0.437431	5.11487	2	0.545958	5.22751	4	0.635659	5.39421	5	0.713178	#NUM!	0		5.11065	5	0.540421	5.25454	7	0.644518	5.05433	3	0.491694	5.31086	9	0.6866	0.530363	0.275427	0.825009
FT707	FT707	409.921	774.853			774.85	774.854	408.396	411.007	17	596;2060;2814;3606;5327;7150;9446;10201;10922;11644;12201;12966;14370;15894;16700;17518;19645		0	0.0402438	0.0523886	-0.0663732	0.0695599	0.00109251	0.00701059	5.31052	4	0.642303	5.17042	4	0.584718	5.34152	4	0.703212	5.15566	4	0.571429	#NUM!	0		5.32602	8	0.678848	5.16304	8	0.579181	5.24047	8	0.616833	5.24859	8	0.642303	0.531966	0.274116	0.826046
FT001	FT001	37.3506	57.9765			57.9763	57.9766	35.9473	39.1748	26	1;784;1487;2228;2989;3784;4790;5520;6481;7349;8248;8922;9630;10380;11080;11800;12356;13149;13886;14569;15265;16072;16914;17704;18324;19122		0	0.00262574	0.0428167	0.00854152	-0.011481	-0.0124095	0.0158221	6.12051	6	0.934662	6.02922	6	0.924695	6.06502	6	0.943522	5.96534	6	0.909192	#NUM!	0		6.09276	12	0.943522	5.99728	12	0.920266	6.07487	12	0.936877	6.01518	12	0.932447	0.533592	0.272791	0.827114
FT832	FT832	286.691	885.551	PI(18:1e/20-HETE);PI(16:0/22:4(10Z,13Z,16Z,19Z));PI(16:0/22:	+	885.549	885.554	284.457	289	26	708;1437;2164;2914;3718;4693;5435;6382;7272;8164;8867;9548;10313;11022;11741;12286;13076;13836;14485;15202;16003;16824;17643;18272;19062;19732	78.95908;152.9955;171.0054;205.1952;223.0014;241.0119;242.0145;243.016;255.2321;256.2361;259.0224;259.2431;281.2481;282.2516;282.3989;283.2643;285.2228;297.038;302.3103;303.2333;304.2354;305.2464;315.0485;329.2501;330.2512;331.2629;391.2254;392.2276;393.2315;417.2405;417.9675;418.2438;419.2567;437.2669;439.2248;441.2401;467.2513;553.2787;554.2828;555.2826;571.2911;579.2943;579.5175;580.2971;581.3…	1	0.035625	-0.0124562	0.00154451	-0.00586953	0.0268422	0.0129134	6.52221	6	0.976744	6.4692	6	0.978959	6.71686	6	0.991141	6.67056	6	0.988926	#NUM!	0		6.61954	12	0.986711	6.56988	12	0.984496	6.4957	12	0.980066	6.69371	12	0.990033	0.539195	0.268254	0.834105
FT413	FT413	405.969	499.056	Sorafenib;[3-(3-{[3,4-dihydroxy-5-(hydroxymethyl)oxolan-2-yl		499.05	499.058	404.607	406.967	23	350;1107;1836;2579;3354;4226;5930;6886;7761;8567;9969;10710;11432;12071;12717;13495;14892;15644;16445;17277;17993;18693;19443		0	-0.0284103	-0.0154822	0.0248988	0.00449917	-0.00321745	-0.0144338	4.76395	5	0.262458	4.83836	5	0.30897	4.8291	5	0.339978	4.89753	6	0.368771	#NUM!	0		4.79652	10	0.297896	4.86794	11	0.324474	4.80115	10	0.27907	4.86331	11	0.351052	0.539993	0.267612	0.834105
FT634	FT634	277.801	740.541	Phosphatidylethanolamine alkyl 18;Phosphatidylcholine alkyl		740.538	740.552	274.752	280.668	11	2013;3561;4482;5271;6171;8731;10152;11594;12163;12910;15048		0	0.0285905	0.0610345	-0.062848	0.023408	0.00567433	0.0894973	4.81099	5	0.294574	4.54844	2	0.114064	4.84795	4	0.357697	4.02024	0	0.00442968	#NUM!	0		4.82947	9	0.324474	4.28434	2	0.0155039	4.67972	7	0.194906	4.4341	4	0.0620155	0.541942	0.266047	0.834562
FT626	FT626	278.291	737.537	SM(d18:0/16:1(9Z));Palmitoyl sphingomyelin;Sphingomyelin d18		737.536	737.539	275.893	281.586	26	536;1276;2007;2763;3555;4473;5264;6164;7093;7983;8724;9404;10147;10872;11587;12160;12903;13662;14306;15041;15837;16625;17457;18119;18879;19591	78.95911;122.9849;168.0431;449.3151;598.4606;616.4708;678.4632;685.4269;685.53;686.5324;687.5475;688.5507;688.8967;689.024;689.1715;689.5524;735.2673;737.4524;737.539|7743.22800489231;314.465062695496;75608.9776961687;3442.51938103978;1113.81213564827;4576.14084476971;4203.36927854784;7065.46191947922;72325.4567772743;1354.34601167294;2856147.28827734;3842.21921278005;3361.28702877293;1607.980279…	1	0.0119739	0.00549331	-0.00511584	-0.00546714	0.0312898	0.0156162	6.2774	6	0.959025	6.2385	6	0.954596	6.30749	6	0.972315	6.2688	6	0.962348	#NUM!	0		6.29245	12	0.968992	6.25365	12	0.96124	6.25795	12	0.956811	6.28814	12	0.9701	0.542181	0.265855	0.834562
FT566	FT566	443.918	671.086	Methyl 3,4,6-tri-O-galloyl-beta-D-glucopyranoside;Methyl 2,3		671.077	671.093	441.833	444.72	14	1227;1957;2712;3502;4402;6089;8676;9347;10095;10826;13617;18077;18832;19545	78.95888;96.96929;135.0304;138.9799;150.979;192.9905;211.0015;280.023;322.0393;323.0285;324.0319;346.0562;347.0394;402.9943;427.006;671.0769|2588.88697536936;1507.72370092896;209.262607493038;277.388943694187;737.874788403202;430.569896844831;4054.26433205018;2108.63438114512;313.475380212077;76699.7396335957;2322.46455380673;637.64114190559;42584.3965234167;1569.14254015435;1193.94023137888;1841…	1	-0.0431248	0.110076	-0.00704068	-0.0542646	0.0424017	-0.0138461	5.46076	5	0.732004	5.25101	4	0.636766	4.60343	1	0.170543	4.79313	3	0.269103	#NUM!	0		5.0321	6	0.481728	5.02207	7	0.48948	5.35589	9	0.689922	4.69828	4	0.224806	0.543696	0.264644	0.835361
FT630	FT630	277.998	739.539	DG(22:4(7Z,10Z,13Z,16Z)/22:5(4Z,7Z,10Z,13Z,16Z)/0:0);DG(22:4		739.537	739.541	275.893	281.586	26	540;1279;2011;2767;3559;4478;5267;6168;7098;7987;8728;9406;10150;10876;11590;12162;12907;13666;14310;15045;15841;16629;17461;18122;18884;19595	78.95865;168.0427;616.4677;680.4681;685.4273;687.4347;687.5467;688.5485;689.5593;739.5441|686.588296139045;7843.57767882708;225.741173354277;472.142929346478;559.080071160588;163.33420597316;164959.909336293;2708.80636513069;118878.05076733;34854.7974022663	1	0.0111549	0.00410601	-0.0048316	-0.00576489	0.0314701	0.0152867	5.94327	6	0.903654	5.90465	6	0.90144	5.9726	6	0.924695	5.93821	6	0.904762	#NUM!	0		5.95794	12	0.920266	5.92143	12	0.902547	5.92396	12	0.902547	5.95541	12	0.918051	0.544595	0.263926	0.835361
FT257	FT257	370.727	319.961	xanthurenic acid 8-O-sulfate		319.96	319.962	370.039	372.007	24	221;985;1716;2444;3215;4040;4999;5759;6736;7602;8441;9837;10589;11299;12578;13360;14078;14777;15501;16308;17131;17889;18547;19321	59.01426;79.95735;106.9807;123.6333;124.0072;221.9839|390.559806405714;9713.77387326229;269.636838860891;473.79697991874;122062.345395988;1408.13012376061	1	-0.0369412	-0.00378224	-0.00799064	0.00914567	-0.00766501	0.0233433	5.01212	6	0.448505	4.95111	5	0.426357	4.86695	5	0.368771	4.93649	6	0.409745	#NUM!	0		4.93954	11	0.401993	4.9438	11	0.408638	4.98161	11	0.434109	4.90172	11	0.393134	0.547066	0.26196	0.835689
FT082	FT082	417.031	171.038	Hydantoin-5-propionic acid;L-alpha-Amino-5-oxo-2(5H)-isoxazo		171.038	171.039	416.274	417.71	19	72;851;1565;2297;3865;5594;6563;7432;8992;9695;10446;12432;13213;15341;16151;16988;17766;18396;19192	74.0249|51781.003068044	0.952381	-0.0564467	-0.00880984	0.0232587	0.00177429	-0.0244278	-0.0429461	4.8479	4	0.322259	4.94754	5	0.424142	4.6871	2	0.228128	4.98085	6	0.445183	#NUM!	0		4.7675	6	0.269103	4.96419	11	0.434109	4.89772	9	0.363234	4.83398	8	0.317829	0.547385	0.261707	0.835689
FT275	FT275	62.9036	335.222	NCGC00347775-02!(Z)-5-[(1S,2R,4aR,8aR)-5-(hydroxymethyl)-1,2	+	335.217	335.223	60.4808	63.5408	12	237;999;3233;4060;5780;6754;7621;8456;9856;13375;16326;18565	113.0969;137.098;163.113;183.102;191.1435;209.1182;221.118;235.1334;273.2221;317.2115;335.0784;335.2223;335.2575;335.2963|200.6917990719;243.962292305523;218.796449753462;199.160051324114;742.95110670279;734.387038692905;949.926955907436;1545.62529419299;903.44261602452;1631.92639197305;304.093463797585;9272.55457679552;714.577355783015;203.478820946168	1	-0.0469574	-0.0168334	0.0144278	-0.0288865	-0.0200007	-0.0145077	4.69759	3	0.209302	4.80668	4	0.291251	4.51397	1	0.10742	4.62271	2	0.177187	#NUM!	0		4.60578	4	0.152824	4.7147	6	0.220377	4.75214	7	0.249169	4.56834	3	0.136213	0.547777	0.261396	0.835689
FT893	FT893	237.179	993.603			993.601	993.606	231.598	239.666	19	762;1479;2967;4753;5494;6453;7331;8223;8915;10366;11794;12340;13129;14549;15258;16057;16879;18319;19110		0	0.0084741	-0.0341338	-0.0166587	-0.0261966	-0.0208967	0.0153269	4.73546	4	0.245847	4.65153	4	0.183832	4.79155	5	0.302326	4.67981	4	0.204873	#NUM!	0		4.7635	9	0.264673	4.66567	8	0.186047	4.69349	8	0.207087	4.73568	9	0.245847	0.548674	0.260686	0.835689
FT253	FT253	287.028	314.122	Neosaxitoxin;N'-Hydroxysaxitoxin;N-(1-Deoxy-1-fructosyl)leuc		314.121	314.123	284.457	289	23	218;983;1715;2443;3213;4035;4997;5756;6732;7599;9127;9833;10587;11296;12575;13357;14077;14774;15498;16304;17128;18544;19318		0	-0.0390145	0.000386908	-0.0202873	0.00269149	-0.0221869	-0.00889305	4.9595	6	0.40753	4.89291	5	0.376523	4.79508	5	0.305648	4.85145	5	0.320044	#NUM!	0		4.87729	11	0.351052	4.87218	10	0.326689	4.92621	11	0.392027	4.82326	10	0.310078	0.549546	0.259996	0.835689
FT401	FT401	430.859	487.178	Staurosporine;8-Butanoylneosolaniol;8-Isobutanoylneosolaniol		487.177	487.179	429.726	432.894	26	341;1099;1830;2570;3346;4212;5104;5922;6879;7755;8557;9235;9960;10703;11424;12065;12710;13487;14171;14884;15633;16436;17268;17987;18681;19436	59.01404;71.01383;73.02946;84.04497;89.02423;97.02932;101.0242;109.0404;113.024;115.0399;119.0346;127.051;128.0349;131.0346;143.0346;144.6225;145.0617;161.0453;179.0558;221.0665;263.0772;281.088;341.109;487.1775;487.215|4652.65458585575;3626.49861475905;4842.10648100614;1027.10063515494;10089.577234283;3606.88078462687;13471.8905513082;9524.11681509942;5038.41510278363;869.30153260103;6803.857948…	1	0.0163588	0.0117683	-0.0209223	-0.0293774	0.0311707	0.0929789	5.96501	6	0.911406	5.86977	6	0.89258	6.02662	6	0.934662	5.82565	6	0.880399	#NUM!	0		5.99581	12	0.925803	5.84771	12	0.888151	5.91739	12	0.900332	5.92613	12	0.904762	0.552534	0.257641	0.838786
FT090	FT090	383.817	180.066	Tyrosine (Not validated);3-Hydroxyphenylalanine;3-Amino-3-(4	+	180.066	180.067	381.848	385.268	12	80;858;3077;3877;6572;7443;11163;12441;15350;16158;16999;18405	119.0496;163.0399;180.0661|332.356509909538;348.007885260425;217.459671413047	1	-0.0392168	-0.0168503	0.0136668	0.043452	-0.0215877	-0.00570723	4.46537	2	0.0730897	4.55305	2	0.119601	4.5107	2	0.106312	4.66458	4	0.194906	#NUM!	0		4.48803	4	0.0741971	4.60882	6	0.152824	4.50921	4	0.0786268	4.58764	6	0.152824	0.555113	0.255618	0.839952
FT853	FT853	283.914	902.571	PS(18:3(6Z,9Z,12Z)/24:1(15Z));PS(18:3(9Z,12Z,15Z)/24:1(15Z))		902.566	902.573	281.978	285.592	3	2176;9565;12300	279.2333;281.2494;520.3022;697.4867;740.5215;781.5269;782.5357;866.5415;902.4742;902.5777;902.6769;903.5629|704.308476658284;326.598804872472;51.8464431323537;35.5725677553437;544.844416751152;80.0167196757002;3889.00922776705;39.6504136296244;57.7453649086976;7170.94636249324;35.4098433290346;45.5496906156895	1	0.0262089	0.0337101	0.00372554	-0.00169602	0.00144262	-0.0410168	4.44432	1	0.0598007	4.53639	1	0.10742	4.49136	1	0.0941307	4.39415	0	0.0598007	#NUM!	0		4.46784	2	0.0675526	4.46527	1	0.0741971	4.49035	2	0.0730897	4.44275	1	0.0653378	0.555206	0.255546	0.839952
FT381	FT381	285.776	462.297	Perindopril Erbumine (Aceon);Phosphatidylethanolamine lyso a		462.289	462.299	283.218	287.802	23	320;1083;1811;2548;3325;5084;5897;6861;7734;8539;9218;9942;10687;11405;12047;12691;14156;14870;15616;16414;17244;17974;19423	78.95886;140.0111;196.0378;265.2529;267.1138;374.186;401.2452;424.2244;462.2983|2366.90470300861;3138.37363052741;6694.59525755017;4587.96715011783;740.680131815009;858.466037261971;1635.71791188408;813.496951432808;49548.6896044086	1	-0.00381655	0.0218588	0.00193058	0.0163268	0.0290661	0.0227753	5.23914	5	0.601329	5.30985	6	0.669989	5.18259	5	0.612403	5.2515	5	0.634551	#NUM!	0		5.21086	10	0.613511	5.28067	11	0.660022	5.27449	11	0.636766	5.21705	10	0.623477	0.556936	0.254195	0.841126
FT499	FT499	302.022	573.111	NCGC00385638-01!2,2'-bis(3,4-dihydroxyphenyl)-3',4,5',6-tetr	+	573.109	573.113	301.053	303.692	18	419;1170;2651;3429;4319;5164;6011;6958;7844;10032;11488;12783;13555;14222;14944;16514;18032;18759	135.0307;267.0735;268.076;269.0775;305.047;573.1103;573.2977|21636.2754226002;124063.16927987;1260.96262272291;1673.10558633766;3115.26137615152;26793.2176029604;784.099451656471	1	-0.0174375	-0.0370461	-0.0101792	-0.000799275	-0.0412205	0.0312303	4.70245	5	0.215947	4.61438	3	0.151717	4.71386	5	0.245847	4.57506	3	0.143965	#NUM!	0		4.70815	10	0.221484	4.59472	6	0.142857	4.65841	8	0.180509	4.64446	8	0.186047	0.55826	0.253164	0.841684
FT891	FT891	239.82	970.634	PE(DiMe(13,5)/DiMe(13,5));PE-NMe(13D5/13M5);PE-NMe(13M5/13D5		970.622	970.637	235.537	242.972	18	760;1477;2964;4748;5487;6444;7324;8219;10364;11792;12337;13126;13879;14544;15255;16052;16876;18317	135.0307;281.2486;724.5252;725.5237;726.5465;764.542;766.5367;820.5939;970.6431|666.839301830893;101.65023320709;31.7237877349044;129.250866232724;1963.18761902591;32.5879666175297;30.2997916357299;209.804829620452;1743.26751587021	1	0.0144578	-0.0306146	-0.00890197	-0.0357217	-0.0434876	0.0186266	4.61893	4	0.157254	4.53865	3	0.108527	4.80928	6	0.317829	4.55588	3	0.128461	#NUM!	0		4.71411	10	0.227021	4.54727	6	0.109635	4.57879	7	0.117386	4.68258	9	0.209302	0.561102	0.250958	0.844525
FT115	FT115	72.374	211.018	Zonisamide;Herniarin;10-Hydroxy-2,8-decadiene-4,6-diynoic ac		211.017	211.019	71.353	76.8237	23	99;879;1604;2329;3907;5630;6601;7475;8335;9014;9722;11186;11883;12464;13245;13977;14669;15378;16179;17021;17789;18426;19216	79.95713;131.0611;147.056;211.018|320.993906512232;4133.96545322264;3660.69215219526;4798.15705767703	1	0.0118864	-0.0147712	0.030049	0.00435927	0.0119564	0.0332042	4.58483	4	0.136213	4.67524	5	0.204873	4.844	6	0.353267	4.86253	6	0.328904	#NUM!	0		4.71441	10	0.228128	4.76889	11	0.266888	4.63004	9	0.159468	4.85327	12	0.336656	0.564819	0.248091	0.844867
FT871	FT871	245.51	921.628	PC(DiMe(11,3)/DiMe(13,5));PC(DiMe(11,5)/DiMe(11,5));PC(DiMe(		921.627	921.631	243.066	247.195	26	738;1461;2190;2945;3740;4723;5462;6416;7298;8195;8897;9585;10346;11047;11770;12315;13105;13863;14518;15231;16029;16856;17675;18301;19088;19762		0	0.0104665	-0.013981	0.00234836	-0.00302208	-0.0119888	0.00634385	5.34275	6	0.657807	5.38211	6	0.703212	5.4125	6	0.738649	5.39361	6	0.712071	#NUM!	0		5.37762	12	0.708749	5.38786	12	0.714286	5.36243	12	0.694352	5.40306	12	0.723145	0.564995	0.247955	0.844867
FT750	FT750	290.484	808.509	PS(18:0/18:2(9Z,12Z));PS(18:1(9Z)/18:1(9Z));PS(18:2(9Z,12Z)/		808.507	808.513	288.275	292.059	25	634;1359;2098;2844;3645;4601;5367;6290;7196;8084;8801;9476;10235;10953;11670;12222;13000;13756;14406;15932;16740;17556;18198;18981;19665		0	-0.0290697	0.0268999	0.00561754	0.0067415	-0.0579383	0.0495758	5.39911	6	0.697674	5.46357	6	0.739756	5.25366	5	0.653378	5.3282	6	0.676633	#NUM!	0		5.32639	11	0.679956	5.39589	12	0.717608	5.43134	12	0.72536	5.29093	11	0.669989	0.565016	0.247939	0.844867
FT161	FT161	267.137	251.078	Deoxyinosine;Nebularine;1-(3-(Trifluoromethyl)phenyl)piperaz		251.078	251.079	264.853	269.42	21	135;911;1644;2366;3138;3947;4929;5667;6646;7511;8366;9053;9758;11912;14012;14701;15412;16216;17054;18467;19247	92.02577;108.0199;135.0308;161.0465;251.0784|556.895374787312;885.742970040562;18925.2393458826;2284.10145880436;3605.6414331079	1	0.020084	0.013847	0.00245679	-0.0113246	0.0314849	-0.0127572	4.84604	6	0.317829	4.77517	5	0.266888	4.70742	3	0.241417	4.82672	5	0.297896	#NUM!	0		4.77673	9	0.280177	4.80095	10	0.290144	4.81061	11	0.291251	4.76707	8	0.265781	0.566117	0.247094	0.844867
FT778	FT778	289.794	835.534	PI(16:0/18:1(11Z));PI(16:0/18:1(9Z));PI(16:1(9Z)/18:0)		835.533	835.536	287.63	291.597	26	660;1388;2126;2869;3673;4632;5398;6327;7225;8114;8827;9502;10263;10979;11696;12248;13028;13787;14435;15165;15961;16766;17589;18228;19012;19689	78.95881;152.9955;223.0011;241.0115;242.0151;243.0164;253.2169;255.2328;256.2364;257.2396;259.0221;279.2322;280.2364;281.2483;282.2528;283.2645;284.2664;297.0375;315.0478;329.2506;391.2254;392.2274;393.2305;409.2356;415.2254;416.2278;417.2402;418.2455;419.2552;420.26;435.252;437.2656;551.2632;552.2708;553.2784;554.2806;555.285;571.2883;572.2897;573.2937;578.2821;579.2926;581.3071;597.3022;673.481…	1	-0.013713	-0.00298461	0.0107749	0.0146487	-0.00150261	0.0480271	6.15548	6	0.939092	6.21028	6	0.950166	6.14097	6	0.949059	6.25594	6	0.959025	#NUM!	0		6.14822	12	0.947951	6.23311	12	0.956811	6.18288	12	0.947951	6.19845	12	0.957918	0.566118	0.247093	0.844867
FT118	FT118	405.118	212.065	4-Hydroxycitrulline;Pelletierine Hydrochloride;5-Methoxytryp		212.064	212.066	404.121	406.329	26	102;880;1606;2333;3105;3911;4895;5633;6603;7478;8338;9016;9724;10475;11189;11885;12467;13247;13979;14671;15381;16182;17023;17792;18428;19218	59.01398;88.04038;112.0511;130.0617|1710.76651252584;206727.469826069;3195.14195797056;23614.3455980956	1	-0.0243287	0.00752563	0.00843275	0.00169511	-0.00173736	-0.0027168	5.42282	6	0.712071	5.4579	6	0.736434	5.37177	6	0.719823	5.40283	6	0.717608	#NUM!	0		5.3973	12	0.719823	5.43036	12	0.734219	5.44036	12	0.730897	5.3873	12	0.719823	0.569004	0.244885	0.847705
FT682	FT682	276.666	767.568	PA(22:1(13Z)/19:2(10Z,13Z));PA(15:0/24:0);PA(19:0/20:0)		767.566	767.572	274.636	280.36	16	581;2802;4535;5311;6222;9436;10190;11632;12193;12948;14354;15090;16681;17501;18155;19629	168.0428;304.2377;679.1662;680.1615;715.5776;716.5855;717.4177;717.5301;717.5456;717.5887;767.3926;767.4338;767.4941;767.5569;767.5803;767.6081|97.1252656704479;38.1776985029092;37.2965290518778;76.8432808429225;3221.23167650225;40.5636605266182;31.5679930460192;227.380955740296;58.2552101594331;1807.09788818122;72.2934987678627;72.2957016384953;250.711656754612;881.607773761567;114.673530774024;…	1	0.0515233	-0.0171273	-0.0242396	-0.00157386	0.0716668	0.00230759	4.60118	4	0.146179	4.50029	2	0.0841639	4.79158	5	0.303433	4.69769	4	0.21041	#NUM!	0		4.69638	9	0.212625	4.59899	6	0.146179	4.55074	6	0.0974529	4.74463	9	0.251384	0.570112	0.24404	0.847705
FT627	FT627	278.291	738.54	PC(14:0/P-18:0);PC(16:0/P-16:0);PC(P-16:0/16:0)		738.539	738.542	275.893	281.586	26	537;1277;2008;2764;3556;4475;5265;6165;7095;7985;8725;9405;10148;10873;11588;12161;12904;13663;14307;15043;15838;16627;17458;18120;18881;19592		0	0.0119573	0.00555891	-0.00506072	-0.00513414	0.0299025	0.0155635	5.91526	6	0.898117	5.8799	6	0.894795	5.94809	6	0.915836	5.90517	6	0.89701	#NUM!	0		5.93167	12	0.914729	5.89254	12	0.895903	5.89758	12	0.894795	5.92663	12	0.905869	0.570932	0.243416	0.847705
FT396	FT396	370.321	482.931	discorhabdin C isomer (+2);3-dihydro-7,8-dehydrodiscorhabdin		482.93	482.932	369.096	371.547	16	336;1826;2567;3342;4204;5916;6875;7750;8554;9956;11420;12706;13482;16430;17264;18675	79.95733;123.6331;124.0072;221.9842;286.9781|3032.96561362405;589.867060554592;202788.318068274;8892.17990232176;57429.692061895	1	-0.0589521	-0.00026169	-0.00687473	0.0102433	0.000282097	0.0215644	5.3641	5	0.677741	5.26829	4	0.646733	5.1646	3	0.603544	5.14891	3	0.565891	#NUM!	0		5.26435	8	0.647841	5.2086	7	0.609081	5.31619	9	0.671096	5.15675	6	0.58804	0.571865	0.242707	0.847705
FT833	FT833	286.691	886.556	PE(DiMe(11,3)/MonoMe(13,5));PE(DiMe(11,5)/MonoMe(11,5));PE(D		886.554	886.558	284.457	289	26	709;1438;2165;2915;3719;4694;5436;6383;7273;8165;8868;9549;10314;11023;11742;12287;13077;13838;14486;15203;16004;16825;17644;18273;19063;19733		0	0.0356876	-0.0118905	0.00182074	-0.00589905	0.026669	0.0120516	6.19845	6	0.945736	6.15059	6	0.945736	6.39308	6	0.974529	6.34585	6	0.973422	#NUM!	0		6.29576	12	0.971207	6.24822	12	0.960133	6.17452	12	0.945736	6.36946	12	0.972315	0.57397	0.241111	0.84831
FT597	FT597	435.989	715.101	{5-[12-(3,4-dihydroxyphenyl)-13-hydroxy-4-oxo-8-{[3,4,5-trih		715.099	715.101	434.913	437.294	8	1984;2741;3533;9384;10123;10849;12875;17433	78.95869;96.97067;192.9889;211.0002;312.9494;346.0558;429.9927;448.0036;715.1014;715.2384;715.3604|189.881069824456;30.6728828298588;36.2547272013387;161.416196220824;260.991064942809;7468.33538623291;311.60218107687;4055.20118887792;7871.89646057739;36.0228854153775;54.0378716072155	1	-0.024052	0.0682754	-0.0219095	0.0434808	0.0405098	-0.00766359	4.6887	3	0.202658	4.57099	3	0.130676	4.4321	1	0.0598007	4.42972	1	0.0708749	#NUM!	0		4.5604	4	0.116279	4.50036	4	0.0919158	4.62984	6	0.158361	4.43091	2	0.0598007	0.574196	0.24094	0.84831
FT727	FT727	252.168	791.563	DG(11D3/13D5/0:0);DG(11D5/11D5/0:0);DG(11M5/13M5/0:0)		791.56	791.565	249.205	257.426	26	615;1345;2081;2828;3624;4579;5350;6267;7172;8063;8788;9464;10219;10940;11656;12213;12980;13737;14388;15124;15913;16721;17535;18178;18958;19652		0	-0.0197342	0.00321746	-0.00203472	0.016426	0.000282218	0.0296873	5.86341	6	0.881506	5.82706	6	0.884828	5.75803	6	0.877076	5.82409	6	0.878184	#NUM!	0		5.81072	12	0.882614	5.82557	12	0.883721	5.84523	12	0.883721	5.79106	12	0.879291	0.578157	0.237955	0.852481
FT024	FT024	379.56	116.072	STD_L-Valine;STD_Betaine ;L-Norvaline	+	116.071	116.072	377.735	380.886	26	21;804;1510;2249;3010;3809;4811;5542;6506;7373;8267;8941;9651;10397;11102;11819;12377;13169;13905;14591;15286;16094;16936;17724;18346;19141	116.0714|4121.36168964213	1	-0.0129918	0.000274558	-0.000234994	0.0276873	0.000469952	0.00984014	5.25752	6	0.615725	5.29279	6	0.6567	5.30042	6	0.681063	5.30949	6	0.668882	#NUM!	0		5.27897	12	0.653378	5.30114	12	0.674419	5.27516	12	0.640089	5.30495	12	0.683278	0.579426	0.237002	0.852481
FT122	FT122	435.918	214.049	Glucosamine;Fructosamine;beta-D-Glucosamine		214.048	214.05	433.994	437.294	21	104;1609;2335;3108;3914;4899;5635;6606;7480;9019;9726;10477;11192;11887;13249;13983;14675;16185;17025;17795;18432	78.72286;78.95923;96.96938;140.0117;152.9955;171.006;214.0487|705.609024304079;238680.192258569;1060.62475806311;130283.540431734;39681.3333327198;3270.51273052175;85519.0527261202	1	0.0266471	-0.0287834	-0.0345733	0.010627	-0.0575829	0.000594062	5.54787	6	0.770764	5.4427	5	0.726467	5.56024	5	0.811739	5.29097	4	0.657807	#NUM!	0		5.55405	11	0.790698	5.36683	9	0.703212	5.49528	11	0.756368	5.42561	9	0.734219	0.580328	0.236326	0.852481
FT383	FT383	35.6125	465.304	Cholesterol sulfate;Sorbitan stearate;1-eicosanoyl-glycero-3		465.3	465.311	34.5385	39.1748	26	322;1085;1813;2551;3327;4184;5086;5900;6864;7737;8541;9221;9945;10689;11407;12049;12694;13468;14158;14872;15618;16417;17247;17976;18663;19425	96.95999;463.8744;465.3049|92713.7068821916;4599.17594124425;1302889.72699417	0.914894	0.0260733	-0.0194783	-0.0121273	-0.00508427	0.0285874	0.0820445	5.64982	6	0.815061	5.57437	6	0.792913	5.80141	6	0.890365	5.70213	6	0.841639	#NUM!	0		5.72561	12	0.85825	5.63825	12	0.818383	5.6121	12	0.807309	5.75177	12	0.870432	0.581468	0.235474	0.852481
FT804	FT804	451.971	854.877			854.875	854.879	450.074	453.022	18	684;2145;3693;5414;7244;8845;9523;10288;10998;11717;13052;14459;15981;16793;17616;18249;19037;19709	126.9046;854.8806;1186.718;1303.76;1348.774;1454.942;1455.943;1465.811;1466.817;1540.839;1582.856;1583.862|87834.510586973;526.741039735089;1368.81988051541;1401.29688475349;1357.26542783682;3806.7588333771;1252.75949437405;3853.18180113708;1328.36440632223;1073.97588659428;20724.8131749524;8897.67676906174	1	0.0406838	0.027794	-0.0416381	0.111077	0.0136641	0.102945	4.80664	3	0.291251	4.9622	5	0.429679	4.92444	3	0.431894	5.02875	6	0.483942	#NUM!	0		4.86554	6	0.3433	4.99547	11	0.465116	4.88442	8	0.352159	4.9766	9	0.454042	0.581852	0.235188	0.852481
FT664	FT664	290.333	759.513			759.509	759.519	288.258	291.868	15	2036;2788;5296;6207;7125;8016;10174;11614;12179;13691;14338;15075;15867;16666;18908	136.9654;152.9955;255.2336;256.2342;281.2477;283.2634;391.2273;417.2393;418.243;419.2561;420.2496;435.2488;437.2675;672.4671;673.4883;701.5148;759.5195|136.124763373529;188.646109563668;51.1072918492914;35.0367753806609;298.597071667047;848.697349564549;41.6277174641891;199.471913101635;39.5978244825073;850.807345942493;31.0642923537443;36.8822663489482;181.318063987032;309.632619422746;63.356630…	1	0.0244721	-0.045474	-0.0184045	-0.0138408	-0.0470035	0.014154	4.94279	4	0.396456	4.85018	3	0.320044	5.13756	5	0.589147	4.8717	3	0.335548	#NUM!	0		5.04018	9	0.491694	4.86094	6	0.317829	4.89649	7	0.361019	5.00463	8	0.479513	0.5833	0.234108	0.852491
FT243	FT243	410.449	308.042	Pomalidomide;Pomalidomide;1-(4-(trifluoromethyl)phenyl)isoqu		308.041	308.042	409.555	412.736	9	208;974;3207;7592;9826;12568;13349;15489;18536	124.0067;129.9574;187.9994;199.9986;218.0104|367.641637994066;201.77540039565;959.587914888482;348.23424849189;722.388739045725	1	-0.0372172	0.00561716	0.0209183	0.00142766	-0.0333405	0.00783461	4.44679	1	0.0620155	4.53392	2	0.106312	4.53422	2	0.120709	4.45498	2	0.0841639	#NUM!	0		4.4905	3	0.076412	4.49445	4	0.0908084	4.49035	3	0.0741971	4.4946	4	0.089701	0.583792	0.233742	0.852491
FT364	FT364	465.212	448.112	Crizotinib (PF-02341066);Crizotinib (PF-02341066);MMV007133		448.112	448.113	464.181	465.879	3	4161;5875;8523	124.0071;136.0079;166.018;180.0329;208.0285;250.0393;268.0496;313.9782;448.1141|694.662517385641;125.340570011055;961.495668718022;33.8870997730396;191.036070038083;224.08232830705;237.639672340299;46.2425421438184;3425.44635292493	1	-0.00879431	-0.00714594	-0.0123939	-0.0344024	0.0123603	0.0024032	4.54708	2	0.111849	4.47757	1	0.0708749	4.4021	0	0.0420819	4.4021	0	0.0653378	#NUM!	0		4.47459	2	0.0697674	4.43984	1	0.0642303	4.51233	3	0.0819491	4.4021	0	0.0442968	0.586514	0.231722	0.853199
FT857	FT857	286.046	910.56	PS(22:2(13Z,16Z)/22:5(4Z,7Z,10Z,13Z,16Z));PS(22:2(13Z,16Z)/2		910.553	910.578	279.029	287.802	23	727;2178;2933;3732;4713;5453;6405;8184;8886;9572;10335;11037;11759;12304;13853;14507;15220;16019;16844;17664;18290;19078;19751	303.2327;329.2474;748.5301;790.5417;790.584;910.4721;910.5846;911.5826|955.799094121525;338.35013029115;1029.15514954282;4825.85834207298;112.631934787311;137.169372612357;10269.2951899488;114.377879917538	1	0.0379201	0.0125013	-0.00224887	-0.036606	0.0180532	-0.0168862	4.92889	6	0.384275	4.86309	5	0.326689	4.92437	5	0.430786	4.93569	6	0.408638	#NUM!	0		4.92663	11	0.393134	4.89939	11	0.365449	4.89599	11	0.358804	4.93003	11	0.417497	0.587622	0.230902	0.853199
FT068	FT068	435.297	161.046	3-Hydroxymethylglutaric acid;2-Hydroxyadipic acid;3-Hydroxya	+	161.045	161.046	432.894	436.503	26	62;842;1555;2286;3056;3854;4855;5583;6553;7423;8304;8982;9687;10435;11145;11855;12421;13205;13942;14632;15330;16140;16980;17759;18387;19184	161.0449|714.712716742967	1	-0.0105262	-0.00484987	-0.00504935	-0.0114776	-0.000278223	0.0257705	5.38902	6	0.689922	5.35618	6	0.689922	5.34376	6	0.706534	5.33518	6	0.683278	#NUM!	0		5.36639	12	0.700997	5.34568	12	0.683278	5.3726	12	0.700997	5.33947	12	0.699889	0.587804	0.230768	0.853199
FT108	FT108	227.406	200.056	7-Aminomethyl-7-carbaguanine;Glucosamine;Fructosamine		200.056	200.056	217.545	235.969	20	92;872;2320;3092;3896;4889;5623;6589;7464;8329;9715;11179;11879;12457;13237;14659;15369;16172;17785;18418		0	-0.0151356	-0.0286011	0.0159196	-0.0415813	-0.0660963	0.00880822	4.83193	5	0.307863	4.74558	4	0.246955	4.8606	5	0.363234	4.72313	4	0.229236	#NUM!	0		4.84627	10	0.333333	4.73436	8	0.230343	4.78876	9	0.273533	4.79187	9	0.289037	0.588208	0.230469	0.853199
FT754	FT754	289.801	812.543	PS(18:0/18:0);PS(14:0/22:0);PS(16:0/20:0)		812.54	812.545	288.059	291.597	25	638;1363;2102;2848;3649;4606;5373;6296;7201;8089;8805;9480;10239;10957;11674;12226;13004;13761;14412;15938;16744;17561;18202;18986;19669	152.9955;279.2338;281.2495;283.2636;284.2664;305.2486;307.2657;419.2568;420.2585;437.266;441.2416;443.2534;445.271;725.5131;740.5231;768.5192;812.5447|1317.83681020899;182.877111806431;331.776310681494;4805.74985356171;307.883447151428;1809.83617992734;275.948745021026;4493.20897618828;298.562835452981;1671.32624341785;1002.36103865676;219.775936845917;220.274829333039;16689.6175655794;403.192986…	1	-0.00662697	0.00882122	-0.00991279	0.000285591	-0.019163	-0.00343581	5.13203	6	0.521595	5.1103	6	0.543743	5.04453	5	0.512735	5.10713	6	0.539313	#NUM!	0		5.08828	11	0.528239	5.10872	12	0.538206	5.12117	12	0.534884	5.07583	11	0.535991	0.590384	0.228865	0.853199
FT651	FT651	45.2222	747.518	PG(16:0/18:1(11Z));PG(16:0/18:1(9Z));PG(16:1(9Z)/18:0)		747.517	747.521	42.8681	45.7871	11	1294;2023;4503;5282;10162;10891;11603;14324;15063;16651;19605	78.9585;152.9957;168.0425;171.0063;209.0219;227.0325;253.2169;254.2212;254.4531;255.233;256.2365;257.2379;279.233;280.2359;280.3905;281.2491;282.2512;283.2614;301.2158;302.2215;303.2328;304.2359;327.2339;328.2357;391.2253;392.2272;393.2307;409.237;417.2412;419.2553;461.2859;465.2619;466.2671;467.2689;483.2727;484.2761;485.278;491.2767;493.2953;509.2878;511.296;673.4821;673.5291;687.5463;715.4959;…	1	0.026447	-0.0584436	-0.117197	0.0789401	-0.00889008	0.0143377	5.58399	3	0.784053	5.34473	2	0.684385	5.52497	3	0.795127	5.35297	2	0.69103	#NUM!	0		5.55448	6	0.791805	5.34885	4	0.688815	5.46436	5	0.741971	5.43897	5	0.739756	0.590561	0.228735	0.853199
FT260	FT260	60.3812	321.243	(1R,4aS,5R,8aS)-5-(5-hydroxy-3-methylpentyl)-1,4a-dimethyl-6	+	321.242	321.244	59.1304	61.5993	19	224;1720;3218;4043;5002;6740;7605;8444;9840;11302;12581;14081;14781;15504;16311;17134;17892;18550;19324	167.1072;169.0869;181.1227;197.1179;221.1548;303.2327;321.2434|698.748490072241;402.5675748936;373.312102746439;825.386291764443;501.605337320251;5288.78016001022;18151.0483657311	1	-0.00262635	-0.0203904	0.00604981	0.0372937	0.0236547	0.0618307	4.71099	4	0.223699	4.78456	4	0.276855	4.79939	4	0.3134	4.91394	6	0.380952	#NUM!	0		4.75519	8	0.254707	4.84925	10	0.3134	4.74778	8	0.248062	4.85667	10	0.341085	0.592368	0.227408	0.853199
FT805	FT805	405.774	855.085			855.076	855.095	404.956	406.901	4	4658;6356;7245;8137		0	-0.0231573	-0.0124727	0.00607846	-0.0320108	-0.0151051	-0.0104826	4.56527	2	0.125138	4.64365	2	0.179402	4.45214	0	0.0708749	4.45214	0	0.0819491	#NUM!	0		4.5087	2	0.0863787	4.54789	2	0.110742	4.60446	4	0.13289	4.45214	0	0.0719823	0.593107	0.226867	0.853199
FT435	FT435	371.157	516.917			516.916	516.919	370.451	372.165	14	367;1855;2598;3375;4253;5954;6905;7781;9985;10729;12738;15663;16465;18711		0	-0.0437623	0.0122268	-0.0240572	0.0115688	-0.0210798	-0.0179632	4.73022	5	0.239203	4.66571	4	0.198228	4.45901	1	0.0741971	4.55253	3	0.125138	#NUM!	0		4.59462	6	0.149502	4.60912	7	0.153931	4.69796	9	0.213732	4.50577	4	0.0941307	0.593145	0.226839	0.853199
FT010	FT010	406.872	88.0404	STD_L-Alanine;STD_ß-Alanin;STD_D-Alanine	+	88.04	88.0407	405.853	408.396	26	9;791;1496;2236;2997;3794;4798;5529;6490;7357;8256;8929;9638;10386;11089;11807;12363;13156;13893;14578;15273;16081;16922;17712;18334;19129	88.04036|1896.03143601758	1	-0.0163165	0.00181258	0.00268952	0.0051717	0.0156427	0.00790941	5.1451	6	0.539313	5.16562	6	0.580288	5.13569	6	0.585825	5.1596	6	0.574751	#NUM!	0		5.14039	12	0.561462	5.16261	12	0.578073	5.15536	12	0.562569	5.14764	12	0.585825	0.59395	0.22625	0.853199
FT849	FT849	283.914	900.555	PE(DiMe(11,3)/MonoMe(13,5));PE(DiMe(11,5)/MonoMe(11,5));PE(D		900.554	900.559	281.978	285.592	3	2175;9563;12298	255.2318;277.22;279.2325;281.2452;303.2334;738.5102;780.5188;850.535;900.456;900.5638;900.6488;900.6806|147.941918739969;40.6480661854175;286.975228883838;36.7067987656924;486.6948774848;568.505053200147;3674.28487451946;44.1925524683256;30.3139813548341;6967.99555552088;30.3172268756953;40.4235967599107	1	0.0247709	0.0305751	0.00269995	-0.00212001	7.33204e-05	-0.0377912	4.44703	1	0.0631229	4.51958	1	0.0952381	4.49106	1	0.0930233	4.39686	0	0.0609081	#NUM!	0		4.46904	2	0.06866	4.45822	1	0.0697674	4.48331	2	0.0697674	4.44396	1	0.0675526	0.596253	0.22457	0.855114
FT060	FT060	289.454	152.002	3-Sulfinoalanine;3-Sulfinato-L-alaninate;3-SULFINO-L-ALANINE		152.002	152.004	279.136	294.611	25	53;834;1543;2277;3046;3844;4846;5573;6542;7411;8297;8974;9680;10427;11136;12412;13196;13934;14624;15318;16131;16971;17752;18378;19174	79.95726;80.96504;106.9804;152.0017|8767.7349654814;450.457412707374;995.029775614515;2143.70279890015	1	-0.045287	-0.00309415	-0.0103725	-0.0078969	-0.0289997	-0.00287129	5.22103	6	0.591362	5.26472	6	0.644518	5.02035	5	0.499446	5.10703	6	0.538206	#NUM!	0		5.12069	11	0.548173	5.18588	12	0.596899	5.24287	12	0.61794	5.06369	11	0.524917	0.600408	0.221553	0.859676
FT633	FT633	249.601	740.523	PE(16:0e/12-HETE);PC(15:0/18:3(6Z,9Z,12Z));PC(15:0/18:3(9Z,1	+	740.522	740.526	247.897	252.62	25	543;1282;2012;2769;4481;5270;6170;7100;7990;8730;9408;10151;10877;11593;12164;12909;13668;14313;15047;15844;16631;17462;18123;18885;19596	140.0114;196.0378;227.2007;253.2171;255.2325;256.2358;277.217;278.3781;279.2331;280.236;281.2485;283.2636;303.233;304.2356;305.2474;452.2786;458.2674;460.283;476.2775;478.2936;690.5076;738.2402;740.5254;742.5392|3293.3530119744;3514.67014382019;434.607531365015;1382.92408396455;9678.89700022588;1890.41786669354;9070.11569386835;860.780081637657;269001.607644304;2089.82580786257;109254.465016322;2…	1	0.0125391	-0.0361991	-0.0170617	-0.00773136	0.0251459	-0.00251359	5.86084	5	0.880399	5.97094	6	0.916944	5.96525	6	0.923588	6.01044	6	0.923588	#NUM!	0		5.91304	11	0.909192	5.99069	12	0.918051	5.91589	11	0.898117	5.98784	12	0.92691	0.604167	0.218843	0.863655
FT189	FT189	477.527	275.089	STD_Anserine;gamma-Glutamylglutamic acid;Glutamylglutamic ac		275.088	275.089	474.163	479.149	17	162;934;2389;3976;4947;5695;6675;7540;8387;10539;11245;11934;13303;14029;14727;18490;19271	82.02977;84.04531;102.0558;127.051;128.0351;146.0456;151.0874;169.0976;195.0773;213.0879;239.0672;257.0781;275.0886|904.27977963509;2075.04006291892;27438.6857343967;7780.67093489133;90778.6007043166;57073.9595348895;1073.23456939826;3541.31200790315;7309.87470101712;2127.1993171583;4914.6752420007;3064.68429418102;6304.24814085379	1	-0.0105331	-0.0340004	-0.00489268	-0.0848273	-0.0277309	-0.0180991	5.25195	4	0.611296	5.15469	4	0.568106	5.23835	5	0.644518	4.98634	2	0.451827	#NUM!	0		5.24515	9	0.632337	5.07051	6	0.520487	5.20332	8	0.59247	5.11235	7	0.559247	0.60605	0.217492	0.864945
FT309	FT309	42.1101	367.092	Mytilin A;Shinorine;(2,3-diphenylcyclopropyl)methyl Phenyl S		367.089	367.096	40.202	43.7066	18	259;1024;1749;2482;5031;6782;8481;9167;11337;12619;13399;14107;14815;15545;17177;17924;18593;19363	59.01407;134.9569;150.9885;208.976;217.0719;219.0512;223.0279;225.0086;266.9633;268.9806;275.0615;277.038;282.9947;291.0906;293.0697;307.1218;335.0262;349.0775;351.0572;365.9652;366.233;367.0892;367.1572;367.2275;367.3574|853.174706486871;1005.52699585018;1602.16899635948;1128.84077316713;521.555276482735;3467.20136081856;5878.13030219838;214.67384682133;3833.14259801197;307.891886896482;235.9567…	1	0.0157914	-0.00546024	0.0316533	0.0212834	0.0150722	0.0590913	4.96521	3	0.410853	5.03496	3	0.490587	5.19781	5	0.624585	5.18416	5	0.589147	#NUM!	0		5.08151	8	0.526024	5.10956	8	0.539313	5.00009	6	0.44629	5.19099	10	0.605759	0.607919	0.216154	0.866211
FT440	FT440	473.818	520.055			520.054	520.056	472.946	475.171	15	371;1128;4257;6908;7786;9988;11448;13511;14188;14902;15666;16468;17296;18714;19455		0	-0.0268929	-0.0695953	0.0410437	-0.000138852	-0.0104906	-0.000512701	4.68421	1	0.200443	4.781	3	0.272425	4.93103	4	0.440753	4.99709	5	0.460687	#NUM!	0		4.80762	5	0.305648	4.88904	8	0.358804	4.73261	4	0.241417	4.96406	9	0.445183	0.614378	0.211564	0.874002
FT508	FT508	489.938	580.036	{[6-({2-[3,5-dihydroxy-4-(sulfooxy)phenyl]-7-hydroxy-5-oxo-5		580.03	580.093	482.472	491.736	15	2658;3434;4326;6019;6965;7853;8629;9304;10777;11492;13562;14227;14946;16521;17345	110.0244;128.0348;196.0621;216.0512;240.0508;259.0225;284.0406;302.0515;320.062|1636.99518433582;1757.96183610735;571.210892386713;309.349328905301;8654.25112952429;1126.80787250954;737.775838109894;6547.34016037797;3183.60627364188	1	-0.0594448	0.0307158	0.0202456	-0.0591026	0.0266602	-0.0217535	5.25883	4	0.616833	5.39636	5	0.712071	4.96353	4	0.465116	4.86085	2	0.327796	#NUM!	0		5.11118	8	0.543743	5.12861	7	0.554817	5.3276	9	0.679956	4.91219	6	0.401993	0.61618	0.210292	0.875055
FT725	FT725	252.041	790.56	PS(18:0/18:0);PS(14:0/22:0);PS(16:0/20:0)		790.549	790.562	241.794	257.426	27	613;1344;2079;2827;3622;4577;5349;6265;7170;8061;8787;9463;10218;10939;11655;12212;12978;13736;14387;15122;15123;15912;16719;17533;18177;18956;19651	59.01396;168.0429;224.0694;227.2018;253.2175;254.2204;255.2329;279.2327;280.2363;281.2484;283.2639;285.2579;303.2328;327.2324;329.2484;331.2643;452.2785;460.2833;462.2979;478.2942;480.3093;506.3225;645.4509;703.521;714.3164;714.505;715.5143;716.5267;717.5259;718.5407;730.5529;731.4888;740.5259;788.116;790.561;790.6318|2007.49819051521;2198.68634620939;2090.06559878858;6843.65029499599;145229.9430…	1	-0.0209957	0.00305963	-0.00170241	0.0171157	0.000637431	0.0295509	6.18879	6	0.943522	6.15576	6	0.946844	6.07529	6	0.945736	6.15245	6	0.941307	#NUM!	0		6.13204	12	0.945736	6.1541	12	0.944629	6.17228	12	0.944629	6.11387	12	0.943522	0.618059	0.20897	0.875055
[truncated: 281 more rows]
[truncated: 27 more columns]

## Sheet: Table 3
Feature number	V1	V2	p value	Compund name	direction	m.Z	ms2 annotation
FT196	2.34411	0.280565	0.000189996		bottom	280.237
FT431	2.34134	0.302277	0.00011891	Alpha-D-Glucose	top	513.121
FT194	2.32842	0.158965	0.000233427	Linoleic acid	bottom	279.233	+
FT208	2.30561	0.531044	0.000388128		bottom	284.267
FT206	2.29964	0.638512	0.000407389	Ethyl hexadecanoate	bottom	283.265	+
FT061	2.22774	0.385568	0.000843513	Phosphoglycolic acid	bottom	154.975
FT875	2.201	0.627439	0.000618462		bottom	928.63
FT026	2.19931	0.321137	0.000767124	2-Hydroxybenzaldehyde	bottom	121.029	+
FT851	2.1504	0.743884	0.00586261	Triparinarin	bottom	901.602
[truncated: 73 more rows]

## Sheet: Table 2
	V1	V2					VIP >1 Upper lobe
FT196	2.34411	0.280565
[truncated: 623 more rows]

## Sheet: Expression
ID	QC1	QC2	X01	X02	X03	X04	X05	X06	X07	X08	X09	X10	X11	X12	X13	X14	X15	X16	X17	X18	X19	X20	X21	X22	X23	X24
[truncated: 903 more rows]

[truncated: 2 more sheets: Table 5, Table 4]
